# Supplementary material for: Fish nursery value of algae habitats in temperate coastal reefs
Source: PeerJ. 2019 May 15;7:e6797. doi: 10.7717/peerj.6797 (PMC6525592; doi:10.7717/peerj.6797)
Supplement: Dataset S1 — All data collected during dive transects: habitat descriptors over transects, algae morphotype cover, fish abundances and estimated sizes. [file peerj-07-6797-s002.xlsx]

## Sheet: Location_Posi
Date	Campaign	Location	Station name	Station	Transects	Lat grados	Lat_mins	Lat_decimals	Long grados	Long_mins	Long_decimals
2014-06-01	1	Mallorca	Cala Egos	1	A	39	33.126	39.5521	2	22.063	2.36772
2014-06-01	1	Mallorca	Cala Egos	1	B	39	32.939	39.549	2	22.096	2.36827
2014-06-02	1	Mallorca	Es Total	2	A	39	33.323	39.5554	2	21.621	2.36035
2014-06-02	1	Mallorca	Es Total	2	B	39	33.431	39.5572	2	21.458	2.35763
2014-06-03	1	Mallorca	Es Bacs	3	A	39	35.924	39.5987	2	21.292	2.35487
2014-06-03	1	Mallorca	Es Bacs	3	B	39	35.824	39.5971	2	21.198	2.3533
2014-06-04	1	Mallorca	St Elm	4	A	39	33.936	39.5656	2	20.845	2.34742
2014-06-04	1	Mallorca	St Elm	4	B	39	34.067	39.5678	2	20.909	2.34848
2014-06-05	1	Mallorca	Cala Llump	5	A	39	31.705	39.5284	2	23.296	2.38827
2014-06-05	1	Mallorca	Cala Llump	5	B	39	31.833	39.5305	2	23.334	2.3889
2014-06-06	1	Mallorca	Es Malgrat	6	A	39	30.022	39.5004	2	27.273	2.45455
2014-06-06	1	Mallorca	Es Malgrat	6	B	39	29.928	39.4988	2	27.108	2.4518
2014-06-07	1	Mallorca	Es Queixal	7	A	39	31.667	39.5278	2	25.242	2.4207
2014-06-07	1	Mallorca	Es Queixal	7	B	39	31.419	39.5237	2	25.297	2.42162
2014-06-08	1	Mallorca	Cala Rafeubetx	8	A	39	28.347	39.4725	2	29.19	2.4865
2014-06-08	1	Mallorca	Cala Rafeubetx	8	B	39	28.322	39.472	2	29.448	2.4908
2014-06-24	2	Menorca	Ref_Integral	9	A	40	3.431	40.0572	3	59.31	3.9885
2014-06-24	2	Menorca	Ref_Integral	9	B	40	3.488	40.0581	3	59.539	3.99232
2014-06-25	2	Menorca	Ref_Partial	10	A	40	5.047	40.0841	4	5.951	4.09918
2014-06-25	2	Menorca	Ref_Partial	10	B	40	4.761	40.0793	4	5.751	4.09585
2014-06-26	2	Menorca	Ref_Partial 2	11	A	40	2.823	40.047	4	9.912	4.1652
2014-06-26	2	Menorca	Ref_Partial 2	11	B	40	3.015	40.0502	4	10.027	4.16712
2014-06-27	2	Menorca	Mongopre	12	A	40	0.155	40.0026	4	13.191	4.21985
2014-06-27	2	Menorca	Mongopre	12	B	40	0.501	40.0084	4	12.755	4.21258
2014-06-28	2	Menorca	Vernis	13	A	40	4.254	40.0709	4	4.691	4.07818
2014-06-28	2	Menorca	Vernis	13	B	40	4.281	40.0714	4	5.035	4.08392
2014-06-29	2	Menorca	Font	14	A	39	49.73	39.8288	4	12.73	4.21217
2014-06-29	2	Menorca	Font	14	B	39	49.272	39.8212	4	13.465	4.22442
2014-06-30	2	Menorca	La_Mola	15	A	39	52.329	39.8721	4	19.081	4.31802
2014-06-30	2	Menorca	La_Mola	15	B	39	52.305	39.8717	4	18.712	4.31187
2014-07-01	2	Menorca	Es Grau	16	A	39	57.794	39.9632	4	15.88	4.26467
2014-07-01	2	Menorca	Es Grau	16	B	39	57.895	39.9649	4	15.646	4.26077
2014-09-02	3	Menorca	Es_Caragol	17	A	39	48.558	39.8093	4	15.247	4.25412
2014-09-02	3	Menorca	Es_Caragol	17	B	39	48.809	39.8135	4	14.964	4.2494
2014-09-03	3	Menorca	Punta_Prima	18	A	39	49.302	39.8217	4	17.699	4.29498
2014-09-03	3	Menorca	Punta_Prima	18	B	39	49.483	39.8247	4	17.778	4.2963
2014-09-04	3	Menorca	Sas_piedras_blaves	19	A	39	52.787	39.8798	4	19.11	4.3185
2014-09-04	3	Menorca	Sas_piedras_blaves	19	B	39	52.89	39.8815	4	18.861	4.31435
2014-09-05	3	Menorca	Punta_Galera	20	A	39	56.791	39.9465	4	17.166	4.2861
2014-09-05	3	Menorca	Punta_Galera	20	B	39	56.7	39.945	4	16.938	4.2823
2014-09-06	3	Menorca	Isla_Colon	21	A	39	57.9	39.965	4	16.774	4.27957
2014-09-06	3	Menorca	Isla_Colon	21	B	39	57.715	39.9619	4	16.89	4.2815
2014-09-07	3	Menorca	Illes_de_ses_Peques	22	A	39	59.172	39.9862	4	15.794	4.26323
2014-09-07	3	Menorca	Illes_de_ses_Peques	22	B	39	59.172	39.9862	4	15.57	4.2595
2014-09-08	3	Menorca	Punta_Talonger	23	A	40	2.163	40.0361	4	10.319	4.17198
2014-09-08	3	Menorca	Punta_Talonger	23	B	40	2.165	40.0361	4	10.12	4.16867
2014-09-09	3	Menorca	Fornells	24	A	40	3.726	40.0621	4	7.733	4.12888
2014-09-09	3	Menorca	Fornells	24	B	40	3.837	40.0639	4	7.86	4.131
2014-09-16	4	Mallorca	Es Ratjoli	25	A	39	36.854	39.6142	2	23.091	2.38485
2014-09-16	4	Mallorca	Es Ratjoli	25	B	39	37.05	39.6175	2	23.529	2.39215
2014-09-17	4	Mallorca	Es Pitxat	26	A	39	33.771	39.5628	2	21.296	2.35493
2014-09-17	4	Mallorca	Es Pitxat	26	B	39	33.663	39.5611	2	21.348	2.3558
2014-09-18	4	Mallorca	Dragonera tramuntana	27	A	39	35.702	39.595	2	20.197	2.33662
2014-09-18	4	Mallorca	Dragonera tramuntana	27	B	39	35.445	39.5907	2	20.147	2.33578
2014-09-19	4	Mallorca	Calla Lump	28	A	39	31.77	39.5295	2	23.335	2.38892
2014-09-19	4	Mallorca	Calla Lump	28	B	39	31.607	39.5268	2	23.279	2.38798
2014-09-20	4	Mallorca	Es Total	29	A	39	33.221	39.5537	2	21.756	2.3626
2014-09-20	4	Mallorca	Es Total	29	B	39	33.271	39.5545	2	21.618	2.3603
2014-09-21	4	Mallorca	El Toro	30	A	39	27.964	39.4661	2	28.471	2.47452
2014-09-21	4	Mallorca	El Toro	30	B	39	27.802	39.4634	2	28.341	2.47235
2014-09-22	4	Mallorca	Malgrat North	31	A	39	29.971	39.4995	2	27.039	2.45065
2014-09-22	4	Mallorca	Malgrat North	31	B	39	30.054	39.5009	2	27.2	2.45333
2014-09-23	4	Mallorca	Calla Llebeig (Dragonera)	32	A	39	34.541	39.5757	2	19.006	2.31677
2014-09-23	4	Mallorca	Calla Llebeig (Dragonera)	32	B	39	34.404	39.5734	2	18.485	2.30808

## Sheet: Fish visual census
Date	Campaign	Location	Station name	Observer	Station	Site	Transect	Species	No	Size
2014-06-02	1	Mallorca	Egos	Olga	1	A	1	C.julis	1	10
2014-06-02	1	Mallorca	Egos	Olga	1	A	1	C.julis	1	10
2014-06-02	1	Mallorca	Egos	Olga	1	A	1	C.julis	1	8
2014-06-02	1	Mallorca	Egos	Olga	1	A	1	C.julis	1	8
2014-06-02	1	Mallorca	Egos	Olga	1	A	1	C.julis	1	6
2014-06-02	1	Mallorca	Egos	Olga	1	A	1	D.annularis	1	14
2014-06-02	1	Mallorca	Egos	Olga	1	A	1	D.annularis	1	14
2014-06-02	1	Mallorca	Egos	Olga	1	A	1	D.annularis	1	10
2014-06-02	1	Mallorca	Egos	Olga	1	A	1	D.annularis	1	10
2014-06-02	1	Mallorca	Egos	Olga	1	A	1	D.annularis	1	10
2014-06-02	1	Mallorca	Egos	Olga	1	A	1	D.sargus	1	14
2014-06-02	1	Mallorca	Egos	Olga	1	A	1	D.sargus	1	14
2014-06-02	1	Mallorca	Egos	Olga	1	A	1	D.vulgaris	1	12
2014-06-02	1	Mallorca	Egos	Olga	1	A	1	D.vulgaris	1	4
2014-06-02	1	Mallorca	Egos	Olga	1	A	1	D.vulgaris	1	3
2014-06-02	1	Mallorca	Egos	Olga	1	A	1	S.scriba	1	14
2014-06-02	1	Mallorca	Egos	Olga	1	A	1	S.scriba	1	12
2014-06-02	1	Mallorca	Egos	Olga	1	A	1	S.scriba	1	8
2014-06-02	1	Mallorca	Egos	Olga	1	A	1	S.scriba	1	8
2014-06-02	1	Mallorca	Egos	Olga	1	A	1	S.tinca	1	14
2014-06-02	1	Mallorca	Egos	Olga	1	A	1	S.tinca	1	12
2014-06-02	1	Mallorca	Egos	Olga	1	A	2	C.julis	1	10
2014-06-02	1	Mallorca	Egos	Olga	1	A	2	C.julis	1	6
2014-06-02	1	Mallorca	Egos	Olga	1	A	2	C.julis	1	6
2014-06-02	1	Mallorca	Egos	Olga	1	A	2	D.annularis	1	12
2014-06-02	1	Mallorca	Egos	Olga	1	A	2	D.annularis	1	10
2014-06-02	1	Mallorca	Egos	Olga	1	A	2	D.vulgaris	1	12
2014-06-02	1	Mallorca	Egos	Olga	1	A	2	D.vulgaris	1	12
2014-06-02	1	Mallorca	Egos	Olga	1	A	2	D.vulgaris	1	10
2014-06-02	1	Mallorca	Egos	Olga	1	A	2	O.melanura	1	8
2014-06-02	1	Mallorca	Egos	Olga	1	A	2	O.melanura	1	8
2014-06-02	1	Mallorca	Egos	Olga	1	A	2	O.melanura	1	8
2014-06-02	1	Mallorca	Egos	Olga	1	A	2	O.melanura	1	8
2014-06-02	1	Mallorca	Egos	Olga	1	A	2	O.melanura	1	8
2014-06-02	1	Mallorca	Egos	Olga	1	A	2	O.melanura	1	8
2014-06-02	1	Mallorca	Egos	Olga	1	A	2	O.melanura	1	8
2014-06-02	1	Mallorca	Egos	Olga	1	A	2	O.melanura	1	8
2014-06-02	1	Mallorca	Egos	Olga	1	A	2	O.melanura	1	8
2014-06-02	1	Mallorca	Egos	Olga	1	A	2	O.melanura	1	8
2014-06-02	1	Mallorca	Egos	Olga	1	A	2	O.melanura	1	8
2014-06-02	1	Mallorca	Egos	Olga	1	A	2	O.melanura	1	8
2014-06-02	1	Mallorca	Egos	Olga	1	A	2	O.melanura	1	8
2014-06-02	1	Mallorca	Egos	Olga	1	A	2	O.melanura	1	8
2014-06-02	1	Mallorca	Egos	Olga	1	A	2	O.melanura	1	8
2014-06-02	1	Mallorca	Egos	Olga	1	A	2	O.melanura	1	8
2014-06-02	1	Mallorca	Egos	Olga	1	A	2	O.melanura	1	8
2014-06-02	1	Mallorca	Egos	Olga	1	A	2	O.melanura	1	8
2014-06-02	1	Mallorca	Egos	Olga	1	A	2	O.melanura	1	8
2014-06-02	1	Mallorca	Egos	Olga	1	A	2	O.melanura	1	8
2014-06-02	1	Mallorca	Egos	Olga	1	A	2	O.melanura	1	8
2014-06-02	1	Mallorca	Egos	Olga	1	A	2	O.melanura	1	8
2014-06-02	1	Mallorca	Egos	Olga	1	A	2	O.melanura	1	8
2014-06-02	1	Mallorca	Egos	Olga	1	A	2	O.melanura	1	8
2014-06-02	1	Mallorca	Egos	Olga	1	A	2	O.melanura	1	8
2014-06-02	1	Mallorca	Egos	Olga	1	A	2	O.melanura	1	8
2014-06-02	1	Mallorca	Egos	Olga	1	A	2	O.melanura	1	8
2014-06-02	1	Mallorca	Egos	Olga	1	A	2	O.melanura	1	8
2014-06-02	1	Mallorca	Egos	Olga	1	A	2	O.melanura	1	8
2014-06-02	1	Mallorca	Egos	Olga	1	A	2	O.melanura	1	8
2014-06-02	1	Mallorca	Egos	Olga	1	A	2	O.melanura	1	8
2014-06-02	1	Mallorca	Egos	Olga	1	A	2	O.melanura	1	8
2014-06-02	1	Mallorca	Egos	Olga	1	A	2	O.melanura	1	8
2014-06-02	1	Mallorca	Egos	Olga	1	A	2	O.melanura	1	8
2014-06-02	1	Mallorca	Egos	Olga	1	A	2	O.melanura	1	8
2014-06-02	1	Mallorca	Egos	Olga	1	A	2	O.melanura	1	8
2014-06-02	1	Mallorca	Egos	Olga	1	A	2	O.melanura	1	8
2014-06-02	1	Mallorca	Egos	Olga	1	A	2	O.melanura	1	8
2014-06-02	1	Mallorca	Egos	Olga	1	A	2	O.melanura	1	8
2014-06-02	1	Mallorca	Egos	Olga	1	A	2	O.melanura	1	8
2014-06-02	1	Mallorca	Egos	Olga	1	A	2	O.melanura	1	8
2014-06-02	1	Mallorca	Egos	Olga	1	A	2	O.melanura	1	8
2014-06-02	1	Mallorca	Egos	Olga	1	A	2	O.melanura	1	8
2014-06-02	1	Mallorca	Egos	Olga	1	A	2	O.melanura	1	8
2014-06-02	1	Mallorca	Egos	Olga	1	A	2	O.melanura	1	8
2014-06-02	1	Mallorca	Egos	Olga	1	A	2	O.melanura	1	8
2014-06-02	1	Mallorca	Egos	Olga	1	A	2	O.melanura	1	8
2014-06-02	1	Mallorca	Egos	Olga	1	A	2	O.melanura	1	8
2014-06-02	1	Mallorca	Egos	Olga	1	A	2	O.melanura	1	8
2014-06-02	1	Mallorca	Egos	Olga	1	A	2	O.melanura	1	8
2014-06-02	1	Mallorca	Egos	Olga	1	A	2	S.ocellatus	1	8
2014-06-02	1	Mallorca	Egos	Olga	1	A	2	S.ocellatus	1	6
2014-06-02	1	Mallorca	Egos	Olga	1	A	2	S.roisali	1	8
2014-06-02	1	Mallorca	Egos	Olga	1	A	2	S.salpa	1	12
2014-06-02	1	Mallorca	Egos	Olga	1	A	2	S.salpa	1	12
2014-06-02	1	Mallorca	Egos	Olga	1	A	2	S.salpa	1	12
2014-06-02	1	Mallorca	Egos	Olga	1	A	2	S.salpa	1	12
2014-06-02	1	Mallorca	Egos	Olga	1	A	2	S.salpa	1	12
2014-06-02	1	Mallorca	Egos	Olga	1	A	2	S.salpa	1	12
2014-06-02	1	Mallorca	Egos	Olga	1	A	2	S.salpa	1	12
2014-06-02	1	Mallorca	Egos	Olga	1	A	2	S.salpa	1	12
2014-06-02	1	Mallorca	Egos	Olga	1	A	2	S.scriba	1	14
2014-06-02	1	Mallorca	Egos	Olga	1	A	2	S.tinca	1	12
2014-06-02	1	Mallorca	Egos	Olga	1	A	2	S.tinca	1	12
2014-06-02	1	Mallorca	Egos	Olga	1	A	3	C.julis	1	8
2014-06-02	1	Mallorca	Egos	Olga	1	A	3	C.julis	1	6
2014-06-02	1	Mallorca	Egos	Olga	1	A	3	C.julis	1	6
2014-06-02	1	Mallorca	Egos	Olga	1	A	3	D.annularis	1	14
2014-06-02	1	Mallorca	Egos	Olga	1	A	3	D.annularis	1	12
2014-06-02	1	Mallorca	Egos	Olga	1	A	3	D.sargus	1	14
2014-06-02	1	Mallorca	Egos	Olga	1	A	3	D.sargus	1	10
2014-06-02	1	Mallorca	Egos	Olga	1	A	3	D.vulgaris	1	12
2014-06-02	1	Mallorca	Egos	Olga	1	A	3	D.vulgaris	1	12
2014-06-02	1	Mallorca	Egos	Olga	1	A	3	D.vulgaris	1	4
2014-06-02	1	Mallorca	Egos	Olga	1	A	3	S.ocellatus	1	8
2014-06-02	1	Mallorca	Egos	Olga	1	A	3	S.ocellatus	1	6
2014-06-02	1	Mallorca	Egos	Olga	1	A	3	S.ocellatus	1	6
2014-06-02	1	Mallorca	Egos	Olga	1	A	3	S.ocellatus	1	6
2014-06-02	1	Mallorca	Egos	Olga	1	A	3	S.roisali	1	6
2014-06-02	1	Mallorca	Egos	Olga	1	A	3	S.scriba	1	14
2014-06-02	1	Mallorca	Egos	Olga	1	A	3	S.scriba	1	12
2014-06-02	1	Mallorca	Egos	Olga	1	A	3	S.scriba	1	12
2014-06-02	1	Mallorca	Egos	Olga	1	A	3	S.scriba	1	12
2014-06-02	1	Mallorca	Egos	Olga	1	A	3	T.pavo	1	10
2014-06-02	1	Mallorca	Egos	Joan	1	B	4	C.julis	1	10
2014-06-02	1	Mallorca	Egos	Joan	1	B	4	C.julis	1	6
2014-06-02	1	Mallorca	Egos	Joan	1	B	4	D.annularis	1	8
2014-06-02	1	Mallorca	Egos	Joan	1	B	4	D.annularis	1	6
2014-06-02	1	Mallorca	Egos	Joan	1	B	4	D.sargus	1	14
2014-06-02	1	Mallorca	Egos	Joan	1	B	4	D.sargus	1	14
2014-06-02	1	Mallorca	Egos	Joan	1	B	4	D.sargus	1	12
2014-06-02	1	Mallorca	Egos	Joan	1	B	4	D.sargus	1	12
2014-06-02	1	Mallorca	Egos	Joan	1	B	4	D.vulgaris	1	12
2014-06-02	1	Mallorca	Egos	Joan	1	B	4	D.vulgaris	1	12
2014-06-02	1	Mallorca	Egos	Joan	1	B	4	D.vulgaris	1	10
2014-06-02	1	Mallorca	Egos	Joan	1	B	4	D.vulgaris	1	4
2014-06-02	1	Mallorca	Egos	Joan	1	B	4	O.melanura	1	8
2014-06-02	1	Mallorca	Egos	Joan	1	B	4	O.melanura	1	8
2014-06-02	1	Mallorca	Egos	Joan	1	B	4	O.melanura	1	8
2014-06-02	1	Mallorca	Egos	Joan	1	B	4	O.melanura	1	8
2014-06-02	1	Mallorca	Egos	Joan	1	B	4	O.melanura	1	8
2014-06-02	1	Mallorca	Egos	Joan	1	B	4	O.melanura	1	8
2014-06-02	1	Mallorca	Egos	Joan	1	B	4	O.melanura	1	8
2014-06-02	1	Mallorca	Egos	Joan	1	B	4	O.melanura	1	8
2014-06-02	1	Mallorca	Egos	Joan	1	B	4	O.melanura	1	8
2014-06-02	1	Mallorca	Egos	Joan	1	B	4	O.melanura	1	8
2014-06-02	1	Mallorca	Egos	Joan	1	B	4	O.melanura	1	8
2014-06-02	1	Mallorca	Egos	Joan	1	B	4	O.melanura	1	8
2014-06-02	1	Mallorca	Egos	Joan	1	B	4	O.melanura	1	8
2014-06-02	1	Mallorca	Egos	Joan	1	B	4	O.melanura	1	8
2014-06-02	1	Mallorca	Egos	Joan	1	B	4	O.melanura	1	8
2014-06-02	1	Mallorca	Egos	Joan	1	B	4	O.melanura	1	8
2014-06-02	1	Mallorca	Egos	Joan	1	B	4	O.melanura	1	8
2014-06-02	1	Mallorca	Egos	Joan	1	B	4	O.melanura	1	8
2014-06-02	1	Mallorca	Egos	Joan	1	B	4	O.melanura	1	8
2014-06-02	1	Mallorca	Egos	Joan	1	B	4	O.melanura	1	8
2014-06-02	1	Mallorca	Egos	Joan	1	B	4	O.melanura	1	8
2014-06-02	1	Mallorca	Egos	Joan	1	B	4	O.melanura	1	8
2014-06-02	1	Mallorca	Egos	Joan	1	B	4	O.melanura	1	8
2014-06-02	1	Mallorca	Egos	Joan	1	B	4	O.melanura	1	8
2014-06-02	1	Mallorca	Egos	Joan	1	B	4	O.melanura	1	8
2014-06-02	1	Mallorca	Egos	Joan	1	B	4	O.melanura	1	8
2014-06-02	1	Mallorca	Egos	Joan	1	B	4	O.melanura	1	8
2014-06-02	1	Mallorca	Egos	Joan	1	B	4	O.melanura	1	8
2014-06-02	1	Mallorca	Egos	Joan	1	B	4	O.melanura	1	8
2014-06-02	1	Mallorca	Egos	Joan	1	B	4	O.melanura	1	8
2014-06-02	1	Mallorca	Egos	Joan	1	B	4	S.cabrilla	1	14
2014-06-02	1	Mallorca	Egos	Joan	1	B	4	S.cabrilla	1	12
2014-06-02	1	Mallorca	Egos	Joan	1	B	4	S.cabrilla	1	12
2014-06-02	1	Mallorca	Egos	Joan	1	B	4	S.cabrilla	1	12
2014-06-02	1	Mallorca	Egos	Joan	1	B	4	S.cabrilla	1	12
2014-06-02	1	Mallorca	Egos	Joan	1	B	4	S.cabrilla	1	12
2014-06-02	1	Mallorca	Egos	Joan	1	B	4	S.cabrilla	1	10
2014-06-02	1	Mallorca	Egos	Joan	1	B	4	S.ocellatus	1	6
2014-06-02	1	Mallorca	Egos	Joan	1	B	4	S.ocellatus	1	6
2014-06-02	1	Mallorca	Egos	Joan	1	B	4	S.ocellatus	1	6
2014-06-02	1	Mallorca	Egos	Joan	1	B	4	S.roisali	1	10
2014-06-02	1	Mallorca	Egos	Joan	1	B	4	S.roisali	1	8
2014-06-02	1	Mallorca	Egos	Joan	1	B	4	S.salpa	1	12
2014-06-02	1	Mallorca	Egos	Joan	1	B	4	S.salpa	1	10
2014-06-02	1	Mallorca	Egos	Joan	1	B	4	S.tinca	1	14
2014-06-02	1	Mallorca	Egos	Joan	1	B	4	S.tinca	1	12
2014-06-02	1	Mallorca	Egos	Joan	1	B	4	T.pavo	1	12
2014-06-02	1	Mallorca	Egos	Joan	1	B	4	T.pavo	1	10
2014-06-02	1	Mallorca	Egos	Joan	1	B	5	C.julis	1	12
2014-06-02	1	Mallorca	Egos	Joan	1	B	5	C.julis	1	10
2014-06-02	1	Mallorca	Egos	Joan	1	B	5	C.julis	1	8
2014-06-02	1	Mallorca	Egos	Joan	1	B	5	C.julis	1	6
2014-06-02	1	Mallorca	Egos	Joan	1	B	5	C.julis	1	6
2014-06-02	1	Mallorca	Egos	Joan	1	B	5	C.julis	1	6
2014-06-02	1	Mallorca	Egos	Joan	1	B	5	C.julis	1	6
2014-06-02	1	Mallorca	Egos	Joan	1	B	5	D.sargus	1	14
2014-06-02	1	Mallorca	Egos	Joan	1	B	5	D.vulgaris	1	10
2014-06-02	1	Mallorca	Egos	Joan	1	B	5	D.vulgaris	1	10
2014-06-02	1	Mallorca	Egos	Joan	1	B	5	D.vulgaris	1	8
2014-06-02	1	Mallorca	Egos	Joan	1	B	5	D.vulgaris	1	8
2014-06-02	1	Mallorca	Egos	Joan	1	B	5	D.vulgaris	1	4
2014-06-02	1	Mallorca	Egos	Joan	1	B	5	D.vulgaris	1	3
2014-06-02	1	Mallorca	Egos	Joan	1	B	5	O.melanura	1	8
2014-06-02	1	Mallorca	Egos	Joan	1	B	5	O.melanura	1	8
2014-06-02	1	Mallorca	Egos	Joan	1	B	5	O.melanura	1	8
2014-06-02	1	Mallorca	Egos	Joan	1	B	5	O.melanura	1	8
2014-06-02	1	Mallorca	Egos	Joan	1	B	5	O.melanura	1	8
2014-06-02	1	Mallorca	Egos	Joan	1	B	5	O.melanura	1	8
2014-06-02	1	Mallorca	Egos	Joan	1	B	5	O.melanura	1	8
2014-06-02	1	Mallorca	Egos	Joan	1	B	5	O.melanura	1	8
2014-06-02	1	Mallorca	Egos	Joan	1	B	5	O.melanura	1	8
2014-06-02	1	Mallorca	Egos	Joan	1	B	5	O.melanura	1	8
2014-06-02	1	Mallorca	Egos	Joan	1	B	5	S.mediterraneus	1	12
2014-06-02	1	Mallorca	Egos	Joan	1	B	5	S.ocellatus	1	8
2014-06-02	1	Mallorca	Egos	Joan	1	B	5	S.ocellatus	1	6
2014-06-02	1	Mallorca	Egos	Joan	1	B	5	S.ocellatus	1	6
2014-06-02	1	Mallorca	Egos	Joan	1	B	5	S.roisali	1	18
2014-06-02	1	Mallorca	Egos	Joan	1	B	5	S.roisali	1	10
2014-06-02	1	Mallorca	Egos	Joan	1	B	5	S.roisali	1	10
2014-06-02	1	Mallorca	Egos	Joan	1	B	5	S.tinca	1	12
2014-06-02	1	Mallorca	Egos	Joan	1	B	5	S.tinca	1	12
2014-06-02	1	Mallorca	Egos	Joan	1	B	5	S.tinca	1	10
2014-06-02	1	Mallorca	Egos	Joan	1	B	6	C.julis	1	12
2014-06-02	1	Mallorca	Egos	Joan	1	B	6	C.julis	1	8
2014-06-02	1	Mallorca	Egos	Joan	1	B	6	C.julis	1	8
2014-06-02	1	Mallorca	Egos	Joan	1	B	6	C.julis	1	8
2014-06-02	1	Mallorca	Egos	Joan	1	B	6	C.julis	1	8
2014-06-02	1	Mallorca	Egos	Joan	1	B	6	C.julis	1	6
2014-06-02	1	Mallorca	Egos	Joan	1	B	6	D.sargus	1	14
2014-06-02	1	Mallorca	Egos	Joan	1	B	6	D.vulgaris	1	12
2014-06-02	1	Mallorca	Egos	Joan	1	B	6	D.vulgaris	1	10
2014-06-02	1	Mallorca	Egos	Joan	1	B	6	D.vulgaris	1	4
2014-06-02	1	Mallorca	Egos	Joan	1	B	6	O.melanura	1	8
2014-06-02	1	Mallorca	Egos	Joan	1	B	6	O.melanura	1	8
2014-06-02	1	Mallorca	Egos	Joan	1	B	6	O.melanura	1	8
2014-06-02	1	Mallorca	Egos	Joan	1	B	6	O.melanura	1	8
2014-06-02	1	Mallorca	Egos	Joan	1	B	6	O.melanura	1	8
2014-06-02	1	Mallorca	Egos	Joan	1	B	6	O.melanura	1	8
2014-06-02	1	Mallorca	Egos	Joan	1	B	6	O.melanura	1	8
2014-06-02	1	Mallorca	Egos	Joan	1	B	6	O.melanura	1	8
2014-06-02	1	Mallorca	Egos	Joan	1	B	6	O.melanura	1	8
2014-06-02	1	Mallorca	Egos	Joan	1	B	6	O.melanura	1	8
2014-06-02	1	Mallorca	Egos	Joan	1	B	6	O.melanura	1	8
2014-06-02	1	Mallorca	Egos	Joan	1	B	6	O.melanura	1	8
2014-06-02	1	Mallorca	Egos	Joan	1	B	6	O.melanura	1	8
2014-06-02	1	Mallorca	Egos	Joan	1	B	6	O.melanura	1	8
2014-06-02	1	Mallorca	Egos	Joan	1	B	6	O.melanura	1	8
2014-06-02	1	Mallorca	Egos	Joan	1	B	6	O.melanura	1	8
2014-06-02	1	Mallorca	Egos	Joan	1	B	6	O.melanura	1	8
2014-06-02	1	Mallorca	Egos	Joan	1	B	6	O.melanura	1	8
2014-06-02	1	Mallorca	Egos	Joan	1	B	6	O.melanura	1	8
2014-06-02	1	Mallorca	Egos	Joan	1	B	6	O.melanura	1	8
2014-06-02	1	Mallorca	Egos	Joan	1	B	6	S.ocellatus	1	8
2014-06-02	1	Mallorca	Egos	Joan	1	B	6	S.ocellatus	1	8
2014-06-02	1	Mallorca	Egos	Joan	1	B	6	S.ocellatus	1	6
2014-06-02	1	Mallorca	Egos	Joan	1	B	6	S.ocellatus	1	6
2014-06-02	1	Mallorca	Egos	Joan	1	B	6	S.ocellatus	1	6
2014-06-02	1	Mallorca	Egos	Joan	1	B	6	S.roisali	1	10
2014-06-02	1	Mallorca	Egos	Joan	1	B	6	S.roisali	1	10
2014-06-02	1	Mallorca	Egos	Joan	1	B	6	S.roisali	1	8
2014-06-02	1	Mallorca	Egos	Joan	1	B	6	S.roisali	1	8
2014-06-02	1	Mallorca	Egos	Joan	1	B	6	S.scriba	1	12
2014-06-02	1	Mallorca	Egos	Joan	1	B	6	S.scriba	1	8
2014-06-02	1	Mallorca	Egos	Joan	1	B	6	S.tinca	1	10
2014-06-02	1	Mallorca	Egos	Joan	1	B	6	S.tinca	1	8
2014-06-02	1	Mallorca	Egos	Joan	1	B	6	S.tinca	1	6
2014-06-02	1	Mallorca	Egos	Joan	1	B	6	T.pavo	1	10
2014-06-03	1	Mallorca	Total	Olga	2	A	1	C.julis	1	14
2014-06-03	1	Mallorca	Total	Olga	2	A	1	C.julis	1	12
2014-06-03	1	Mallorca	Total	Olga	2	A	1	C.julis	1	8
2014-06-03	1	Mallorca	Total	Olga	2	A	1	D.annularis	1	14
2014-06-03	1	Mallorca	Total	Olga	2	A	1	D.annularis	1	14
2014-06-03	1	Mallorca	Total	Olga	2	A	1	D.annularis	1	10
2014-06-03	1	Mallorca	Total	Olga	2	A	1	D.annularis	1	14
2014-06-03	1	Mallorca	Total	Olga	2	A	1	D.sargus	1	20
2014-06-03	1	Mallorca	Total	Olga	2	A	1	D.sargus	1	20
2014-06-03	1	Mallorca	Total	Olga	2	A	1	D.vulgaris	1	20
2014-06-03	1	Mallorca	Total	Olga	2	A	1	D.vulgaris	1	12
2014-06-03	1	Mallorca	Total	Olga	2	A	1	L.merula	1	16
2014-06-03	1	Mallorca	Total	Olga	2	A	1	S.mediterraneus	1	8
2014-06-03	1	Mallorca	Total	Olga	2	A	1	S.melanocercus	1	6
2014-06-03	1	Mallorca	Total	Olga	2	A	1	S.ocellatus	1	8
2014-06-03	1	Mallorca	Total	Olga	2	A	1	S.ocellatus	1	8
2014-06-03	1	Mallorca	Total	Olga	2	A	1	S.ocellatus	1	8
2014-06-03	1	Mallorca	Total	Olga	2	A	1	S.roisali	1	10
2014-06-03	1	Mallorca	Total	Olga	2	A	1	S.smaris	1	10
2014-06-03	1	Mallorca	Total	Olga	2	A	1	S.smaris	1	10
2014-06-03	1	Mallorca	Total	Olga	2	A	1	S.smaris	1	10
2014-06-03	1	Mallorca	Total	Olga	2	A	1	S.smaris	1	10
2014-06-03	1	Mallorca	Total	Olga	2	A	1	S.tinca	1	14
2014-06-03	1	Mallorca	Total	Olga	2	A	1	S.tinca	1	14
2014-06-03	1	Mallorca	Total	Olga	2	A	1	S.tinca	1	14
2014-06-03	1	Mallorca	Total	Olga	2	A	1	S.tinca	1	10
2014-06-03	1	Mallorca	Total	Olga	2	A	1	S.tinca	1	10
2014-06-03	1	Mallorca	Total	Olga	2	A	2	C.julis	1	12
2014-06-03	1	Mallorca	Total	Olga	2	A	2	C.julis	1	10
2014-06-03	1	Mallorca	Total	Olga	2	A	2	C.julis	1	6
2014-06-03	1	Mallorca	Total	Olga	2	A	2	C.julis	1	6
2014-06-03	1	Mallorca	Total	Olga	2	A	2	C.julis	1	6
2014-06-03	1	Mallorca	Total	Olga	2	A	2	C.julis	1	6
2014-06-03	1	Mallorca	Total	Olga	2	A	2	C.julis	1	6
2014-06-03	1	Mallorca	Total	Olga	2	A	2	D.annularis	1	14
2014-06-03	1	Mallorca	Total	Olga	2	A	2	D.vulgaris	1	16
2014-06-03	1	Mallorca	Total	Olga	2	A	2	S.ocellatus	1	8
2014-06-03	1	Mallorca	Total	Olga	2	A	2	S.ocellatus	1	8
2014-06-03	1	Mallorca	Total	Olga	2	A	2	S.ocellatus	1	8
2014-06-03	1	Mallorca	Total	Olga	2	A	2	S.ocellatus	1	6
2014-06-03	1	Mallorca	Total	Olga	2	A	2	S.ocellatus	1	6
2014-06-03	1	Mallorca	Total	Olga	2	A	2	S.ocellatus	1	6
2014-06-03	1	Mallorca	Total	Olga	2	A	2	S.scriba	1	14
2014-06-03	1	Mallorca	Total	Olga	2	A	2	S.scriba	1	14
2014-06-03	1	Mallorca	Total	Olga	2	A	2	S.smaris	1	8
2014-06-03	1	Mallorca	Total	Olga	2	A	2	S.smaris	1	8
2014-06-03	1	Mallorca	Total	Olga	2	A	2	S.smaris	1	8
2014-06-03	1	Mallorca	Total	Olga	2	A	2	S.smaris	1	8
2014-06-03	1	Mallorca	Total	Olga	2	A	2	S.smaris	1	8
2014-06-03	1	Mallorca	Total	Olga	2	A	2	S.smaris	1	8
2014-06-03	1	Mallorca	Total	Olga	2	A	2	S.smaris	1	8
2014-06-03	1	Mallorca	Total	Olga	2	A	2	S.smaris	1	8
2014-06-03	1	Mallorca	Total	Olga	2	A	2	S.smaris	1	8
2014-06-03	1	Mallorca	Total	Olga	2	A	2	S.smaris	1	8
2014-06-03	1	Mallorca	Total	Olga	2	A	2	S.smaris	1	8
2014-06-03	1	Mallorca	Total	Olga	2	A	2	S.smaris	1	8
2014-06-03	1	Mallorca	Total	Olga	2	A	2	S.smaris	1	8
2014-06-03	1	Mallorca	Total	Olga	2	A	2	S.smaris	1	8
2014-06-03	1	Mallorca	Total	Olga	2	A	2	S.smaris	1	8
2014-06-03	1	Mallorca	Total	Olga	2	A	2	S.smaris	1	8
2014-06-03	1	Mallorca	Total	Olga	2	A	2	S.smaris	1	8
2014-06-03	1	Mallorca	Total	Olga	2	A	2	S.smaris	1	8
2014-06-03	1	Mallorca	Total	Olga	2	A	2	S.smaris	1	8
2014-06-03	1	Mallorca	Total	Olga	2	A	2	S.smaris	1	8
2014-06-03	1	Mallorca	Total	Olga	2	A	2	S.smaris	1	8
2014-06-03	1	Mallorca	Total	Olga	2	A	2	S.smaris	1	8
2014-06-03	1	Mallorca	Total	Olga	2	A	2	S.smaris	1	8
2014-06-03	1	Mallorca	Total	Olga	2	A	2	S.smaris	1	8
2014-06-03	1	Mallorca	Total	Olga	2	A	2	S.smaris	1	8
2014-06-03	1	Mallorca	Total	Olga	2	A	2	S.smaris	1	8
2014-06-03	1	Mallorca	Total	Olga	2	A	2	S.smaris	1	8
2014-06-03	1	Mallorca	Total	Olga	2	A	2	S.smaris	1	8
2014-06-03	1	Mallorca	Total	Olga	2	A	2	S.smaris	1	8
2014-06-03	1	Mallorca	Total	Olga	2	A	2	S.smaris	1	8
2014-06-03	1	Mallorca	Total	Olga	2	A	2	S.smaris	1	8
2014-06-03	1	Mallorca	Total	Olga	2	A	2	S.smaris	1	8
2014-06-03	1	Mallorca	Total	Olga	2	A	2	S.smaris	1	8
2014-06-03	1	Mallorca	Total	Olga	2	A	2	S.smaris	1	8
2014-06-03	1	Mallorca	Total	Olga	2	A	2	S.smaris	1	8
2014-06-03	1	Mallorca	Total	Olga	2	A	2	S.smaris	1	8
2014-06-03	1	Mallorca	Total	Olga	2	A	2	S.smaris	1	8
2014-06-03	1	Mallorca	Total	Olga	2	A	2	S.smaris	1	8
2014-06-03	1	Mallorca	Total	Olga	2	A	2	S.smaris	1	8
2014-06-03	1	Mallorca	Total	Olga	2	A	2	S.tinca	1	26
2014-06-03	1	Mallorca	Total	Olga	2	A	2	S.tinca	1	14
2014-06-03	1	Mallorca	Total	Olga	2	A	2	S.tinca	1	10
2014-06-03	1	Mallorca	Total	Olga	2	A	2	T.pavo	1	6
2014-06-03	1	Mallorca	Total	Olga	2	A	2	T.pavo	1	6
2014-06-03	1	Mallorca	Total	Olga	2	A	3	C.julis	1	10
2014-06-03	1	Mallorca	Total	Olga	2	A	3	C.julis	1	8
2014-06-03	1	Mallorca	Total	Olga	2	A	3	C.julis	1	8
2014-06-03	1	Mallorca	Total	Olga	2	A	3	C.julis	1	6
2014-06-03	1	Mallorca	Total	Olga	2	A	3	D.annularis	1	8
2014-06-03	1	Mallorca	Total	Olga	2	A	3	D.sargus	1	14
2014-06-03	1	Mallorca	Total	Olga	2	A	3	D.sargus	1	14
2014-06-03	1	Mallorca	Total	Olga	2	A	3	D.vulgaris	1	14
2014-06-03	1	Mallorca	Total	Olga	2	A	3	D.vulgaris	1	12
2014-06-03	1	Mallorca	Total	Olga	2	A	3	D.vulgaris	1	12
2014-06-03	1	Mallorca	Total	Olga	2	A	3	D.vulgaris	1	12
2014-06-03	1	Mallorca	Total	Olga	2	A	3	D.vulgaris	1	10
2014-06-03	1	Mallorca	Total	Olga	2	A	3	L.merula	1	14
2014-06-03	1	Mallorca	Total	Olga	2	A	3	S.mediterraneus	1	10
2014-06-03	1	Mallorca	Total	Olga	2	A	3	S.melanocercus	1	10
2014-06-03	1	Mallorca	Total	Olga	2	A	3	S.ocellatus	1	8
2014-06-03	1	Mallorca	Total	Olga	2	A	3	S.ocellatus	1	8
2014-06-03	1	Mallorca	Total	Olga	2	A	3	S.ocellatus	1	6
2014-06-03	1	Mallorca	Total	Olga	2	A	3	S.ocellatus	1	6
2014-06-03	1	Mallorca	Total	Olga	2	A	3	S.roisali	1	8
2014-06-03	1	Mallorca	Total	Olga	2	A	3	S.scriba	1	14
2014-06-03	1	Mallorca	Total	Olga	2	A	3	S.tinca	1	18
2014-06-03	1	Mallorca	Total	Olga	2	A	3	S.tinca	1	16
2014-06-03	1	Mallorca	Total	Olga	2	A	3	S.tinca	1	16
2014-06-03	1	Mallorca	Total	Olga	2	A	3	S.tinca	1	14
2014-06-03	1	Mallorca	Total	Olga	2	A	3	S.tinca	1	12
2014-06-03	1	Mallorca	Total	Olga	2	A	3	S.tinca	1	12
2014-06-03	1	Mallorca	Total	Joan	2	B	4	C.julis	1	12
2014-06-03	1	Mallorca	Total	Joan	2	B	4	C.julis	1	10
2014-06-03	1	Mallorca	Total	Joan	2	B	4	C.julis	1	6
2014-06-03	1	Mallorca	Total	Joan	2	B	4	C.julis	1	6
2014-06-03	1	Mallorca	Total	Joan	2	B	4	D.annularis	1	10
2014-06-03	1	Mallorca	Total	Joan	2	B	4	D.annularis	1	10
2014-06-03	1	Mallorca	Total	Joan	2	B	4	D.sargus	1	14
2014-06-03	1	Mallorca	Total	Joan	2	B	4	D.vulgaris	1	12
2014-06-03	1	Mallorca	Total	Joan	2	B	4	D.vulgaris	1	10
2014-06-03	1	Mallorca	Total	Joan	2	B	4	L.viridis	1	12
2014-06-03	1	Mallorca	Total	Joan	2	B	4	S.maena	1	8
2014-06-03	1	Mallorca	Total	Joan	2	B	4	S.maena	1	8
2014-06-03	1	Mallorca	Total	Joan	2	B	4	S.maena	1	8
2014-06-03	1	Mallorca	Total	Joan	2	B	4	S.maena	1	8
2014-06-03	1	Mallorca	Total	Joan	2	B	4	S.maena	1	8
2014-06-03	1	Mallorca	Total	Joan	2	B	4	S.maena	1	8
2014-06-03	1	Mallorca	Total	Joan	2	B	4	S.mediterraneus	1	8
2014-06-03	1	Mallorca	Total	Joan	2	B	4	S.melanocercus	1	6
2014-06-03	1	Mallorca	Total	Joan	2	B	4	S.ocellatus	1	8
2014-06-03	1	Mallorca	Total	Joan	2	B	4	S.ocellatus	1	6
2014-06-03	1	Mallorca	Total	Joan	2	B	4	S.ocellatus	1	6
2014-06-03	1	Mallorca	Total	Joan	2	B	4	S.ocellatus	1	6
2014-06-03	1	Mallorca	Total	Joan	2	B	4	S.ocellatus	1	6
2014-06-03	1	Mallorca	Total	Joan	2	B	4	S.ocellatus	1	6
2014-06-03	1	Mallorca	Total	Joan	2	B	4	S.roisali	1	8
2014-06-03	1	Mallorca	Total	Joan	2	B	4	S.roisali	1	8
2014-06-03	1	Mallorca	Total	Joan	2	B	4	S.roisali	1	8
2014-06-03	1	Mallorca	Total	Joan	2	B	4	S.rostratus	1	10
2014-06-03	1	Mallorca	Total	Joan	2	B	4	S.rostratus	1	8
2014-06-03	1	Mallorca	Total	Joan	2	B	4	S.salpa	1	8
2014-06-03	1	Mallorca	Total	Joan	2	B	4	S.salpa	1	8
2014-06-03	1	Mallorca	Total	Joan	2	B	4	S.scriba	1	12
2014-06-03	1	Mallorca	Total	Joan	2	B	4	S.scriba	1	12
2014-06-03	1	Mallorca	Total	Joan	2	B	4	S.scriba	1	10
2014-06-03	1	Mallorca	Total	Joan	2	B	4	S.tinca	1	18
2014-06-03	1	Mallorca	Total	Joan	2	B	4	S.tinca	1	14
2014-06-03	1	Mallorca	Total	Joan	2	B	4	S.tinca	1	12
2014-06-03	1	Mallorca	Total	Joan	2	B	4	S.tinca	1	8
2014-06-03	1	Mallorca	Total	Joan	2	B	4	T.pavo	1	10
2014-06-03	1	Mallorca	Total	Joan	2	B	4	T.pavo	1	8
2014-06-03	1	Mallorca	Total	Joan	2	B	4	T.pavo	1	6
2014-06-03	1	Mallorca	Total	Joan	2	B	4	T.pavo	1	6
2014-06-03	1	Mallorca	Total	Joan	2	B	5	C.julis	1	12
2014-06-03	1	Mallorca	Total	Joan	2	B	5	C.julis	1	8
2014-06-03	1	Mallorca	Total	Joan	2	B	5	C.julis	1	8
2014-06-03	1	Mallorca	Total	Joan	2	B	5	C.julis	1	8
2014-06-03	1	Mallorca	Total	Joan	2	B	5	C.julis	1	8
2014-06-03	1	Mallorca	Total	Joan	2	B	5	C.julis	1	6
2014-06-03	1	Mallorca	Total	Joan	2	B	5	C.julis	1	6
2014-06-03	1	Mallorca	Total	Joan	2	B	5	C.julis	1	6
2014-06-03	1	Mallorca	Total	Joan	2	B	5	D.annularis	1	10
2014-06-03	1	Mallorca	Total	Joan	2	B	5	D.annularis	1	8
2014-06-03	1	Mallorca	Total	Joan	2	B	5	D.sargus	1	12
2014-06-03	1	Mallorca	Total	Joan	2	B	5	D.sargus	1	10
2014-06-03	1	Mallorca	Total	Joan	2	B	5	D.vulgaris	1	10
2014-06-03	1	Mallorca	Total	Joan	2	B	5	D.vulgaris	1	10
2014-06-03	1	Mallorca	Total	Joan	2	B	5	D.vulgaris	1	10
2014-06-03	1	Mallorca	Total	Joan	2	B	5	D.vulgaris	1	10
2014-06-03	1	Mallorca	Total	Joan	2	B	5	S.melanocercus	1	8
2014-06-03	1	Mallorca	Total	Joan	2	B	5	S.ocellatus	1	10
2014-06-03	1	Mallorca	Total	Joan	2	B	5	S.ocellatus	1	8
2014-06-03	1	Mallorca	Total	Joan	2	B	5	S.ocellatus	1	8
2014-06-03	1	Mallorca	Total	Joan	2	B	5	S.ocellatus	1	6
2014-06-03	1	Mallorca	Total	Joan	2	B	5	S.ocellatus	1	6
2014-06-03	1	Mallorca	Total	Joan	2	B	5	S.ocellatus	1	6
2014-06-03	1	Mallorca	Total	Joan	2	B	5	S.ocellatus	1	6
2014-06-03	1	Mallorca	Total	Joan	2	B	5	S.roisali	1	6
2014-06-03	1	Mallorca	Total	Joan	2	B	5	S.roisali	1	6
2014-06-03	1	Mallorca	Total	Joan	2	B	5	S.rostratus	1	10
2014-06-03	1	Mallorca	Total	Joan	2	B	5	S.scriba	1	12
2014-06-03	1	Mallorca	Total	Joan	2	B	5	S.tinca	1	14
2014-06-03	1	Mallorca	Total	Joan	2	B	5	S.tinca	1	12
2014-06-03	1	Mallorca	Total	Joan	2	B	5	S.tinca	1	8
2014-06-03	1	Mallorca	Total	Joan	2	B	5	S.tinca	1	8
2014-06-03	1	Mallorca	Total	Joan	2	B	5	S.tinca	1	8
2014-06-03	1	Mallorca	Total	Joan	2	B	5	S.tinca	1	8
2014-06-03	1	Mallorca	Total	Joan	2	B	5	S.tinca	1	8
2014-06-03	1	Mallorca	Total	Joan	2	B	5	S.tinca	1	8
2014-06-03	1	Mallorca	Total	Joan	2	B	5	S.tinca	1	6
2014-06-03	1	Mallorca	Total	Joan	2	B	5	S.tinca	1	14
2014-06-03	1	Mallorca	Total	Joan	2	B	5	T.pavo	1	10
2014-06-03	1	Mallorca	Total	Joan	2	B	5	T.pavo	1	8
2014-06-03	1	Mallorca	Total	Joan	2	B	6	C.julis	1	10
2014-06-03	1	Mallorca	Total	Joan	2	B	6	C.julis	1	10
2014-06-03	1	Mallorca	Total	Joan	2	B	6	C.julis	1	8
2014-06-03	1	Mallorca	Total	Joan	2	B	6	C.julis	1	8
2014-06-03	1	Mallorca	Total	Joan	2	B	6	C.julis	1	8
2014-06-03	1	Mallorca	Total	Joan	2	B	6	C.julis	1	8
2014-06-03	1	Mallorca	Total	Joan	2	B	6	C.julis	1	8
2014-06-03	1	Mallorca	Total	Joan	2	B	6	C.julis	1	8
2014-06-03	1	Mallorca	Total	Joan	2	B	6	C.julis	1	6
2014-06-03	1	Mallorca	Total	Joan	2	B	6	C.julis	1	6
2014-06-03	1	Mallorca	Total	Joan	2	B	6	D.sargus	1	22
2014-06-03	1	Mallorca	Total	Joan	2	B	6	D.vulgaris	1	14
2014-06-03	1	Mallorca	Total	Joan	2	B	6	D.vulgaris	1	14
2014-06-03	1	Mallorca	Total	Joan	2	B	6	D.vulgaris	1	12
2014-06-03	1	Mallorca	Total	Joan	2	B	6	D.vulgaris	1	12
2014-06-03	1	Mallorca	Total	Joan	2	B	6	D.vulgaris	1	12
2014-06-03	1	Mallorca	Total	Joan	2	B	6	D.vulgaris	1	12
2014-06-03	1	Mallorca	Total	Joan	2	B	6	D.vulgaris	1	12
2014-06-03	1	Mallorca	Total	Joan	2	B	6	D.vulgaris	1	12
2014-06-03	1	Mallorca	Total	Joan	2	B	6	L.viridis	1	18
2014-06-03	1	Mallorca	Total	Joan	2	B	6	S.cabrilla	1	14
2014-06-03	1	Mallorca	Total	Joan	2	B	6	S.ocellatus	1	8
2014-06-03	1	Mallorca	Total	Joan	2	B	6	S.ocellatus	1	6
2014-06-03	1	Mallorca	Total	Joan	2	B	6	S.ocellatus	1	6
2014-06-03	1	Mallorca	Total	Joan	2	B	6	S.ocellatus	1	6
2014-06-03	1	Mallorca	Total	Joan	2	B	6	S.ocellatus	1	6
2014-06-03	1	Mallorca	Total	Joan	2	B	6	S.ocellatus	1	6
2014-06-03	1	Mallorca	Total	Joan	2	B	6	S.ocellatus	1	6
2014-06-03	1	Mallorca	Total	Joan	2	B	6	S.roisali	1	10
2014-06-03	1	Mallorca	Total	Joan	2	B	6	S.rostratus	1	12
2014-06-03	1	Mallorca	Total	Joan	2	B	6	S.tinca	1	20
2014-06-03	1	Mallorca	Total	Joan	2	B	6	S.tinca	1	14
2014-06-03	1	Mallorca	Total	Joan	2	B	6	S.tinca	1	10
2014-06-03	1	Mallorca	Total	Joan	2	B	6	O.melanura	1	8
2014-06-03	1	Mallorca	Total	Joan	2	B	6	O.melanura	1	8
2014-06-03	1	Mallorca	Total	Joan	2	B	6	O.melanura	1	8
2014-06-03	1	Mallorca	Total	Joan	2	B	6	O.melanura	1	8
2014-06-03	1	Mallorca	Total	Joan	2	B	6	O.melanura	1	8
2014-06-03	1	Mallorca	Total	Joan	2	B	6	T.pavo	1	8
2014-06-04	1	Mallorca	Es_Baccs	Olga	3	A	1	C.julis	1	14
2014-06-04	1	Mallorca	Es_Baccs	Olga	3	A	1	C.julis	1	12
2014-06-04	1	Mallorca	Es_Baccs	Olga	3	A	1	C.julis	1	8
2014-06-04	1	Mallorca	Es_Baccs	Olga	3	A	1	C.julis	1	8
2014-06-04	1	Mallorca	Es_Baccs	Olga	3	A	1	C.julis	1	6
2014-06-04	1	Mallorca	Es_Baccs	Olga	3	A	1	C.julis	1	6
2014-06-04	1	Mallorca	Es_Baccs	Olga	3	A	1	C.julis	1	6
2014-06-04	1	Mallorca	Es_Baccs	Olga	3	A	1	D.sargus	1	12
2014-06-04	1	Mallorca	Es_Baccs	Olga	3	A	1	D.sargus	1	12
2014-06-04	1	Mallorca	Es_Baccs	Olga	3	A	1	D.vulgaris	1	12
2014-06-04	1	Mallorca	Es_Baccs	Olga	3	A	1	D.vulgaris	1	12
2014-06-04	1	Mallorca	Es_Baccs	Olga	3	A	1	O.melanura	1	10
2014-06-04	1	Mallorca	Es_Baccs	Olga	3	A	1	O.melanura	1	10
2014-06-04	1	Mallorca	Es_Baccs	Olga	3	A	1	S.ocellatus	1	8
2014-06-04	1	Mallorca	Es_Baccs	Olga	3	A	1	S.ocellatus	1	6
2014-06-04	1	Mallorca	Es_Baccs	Olga	3	A	1	S.ocellatus	1	6
2014-06-04	1	Mallorca	Es_Baccs	Olga	3	A	1	S.ocellatus	1	6
2014-06-04	1	Mallorca	Es_Baccs	Olga	3	A	1	S.ocellatus	1	6
2014-06-04	1	Mallorca	Es_Baccs	Olga	3	A	1	S.roisali	1	10
2014-06-04	1	Mallorca	Es_Baccs	Olga	3	A	1	S.roisali	1	6
2014-06-04	1	Mallorca	Es_Baccs	Olga	3	A	1	S.roisali	1	6
2014-06-04	1	Mallorca	Es_Baccs	Olga	3	A	1	S.scriba	1	12
2014-06-04	1	Mallorca	Es_Baccs	Olga	3	A	1	S.scriba	1	10
2014-06-04	1	Mallorca	Es_Baccs	Olga	3	A	1	T.pavo	1	6
2014-06-04	1	Mallorca	Es_Baccs	Olga	3	A	2	C.julis	1	12
2014-06-04	1	Mallorca	Es_Baccs	Olga	3	A	2	C.julis	1	10
2014-06-04	1	Mallorca	Es_Baccs	Olga	3	A	2	C.julis	1	10
2014-06-04	1	Mallorca	Es_Baccs	Olga	3	A	2	C.julis	1	8
2014-06-04	1	Mallorca	Es_Baccs	Olga	3	A	2	D.annularis	1	8
2014-06-04	1	Mallorca	Es_Baccs	Olga	3	A	2	D.puntazzo	1	16
2014-06-04	1	Mallorca	Es_Baccs	Olga	3	A	2	D.sargus	1	18
2014-06-04	1	Mallorca	Es_Baccs	Olga	3	A	2	D.sargus	1	14
2014-06-04	1	Mallorca	Es_Baccs	Olga	3	A	2	M.surmuletus	1	18
2014-06-04	1	Mallorca	Es_Baccs	Olga	3	A	2	M.surmuletus	1	16
2014-06-04	1	Mallorca	Es_Baccs	Olga	3	A	2	S.ocellatus	1	10
2014-06-04	1	Mallorca	Es_Baccs	Olga	3	A	2	S.ocellatus	1	10
2014-06-04	1	Mallorca	Es_Baccs	Olga	3	A	2	S.ocellatus	1	8
2014-06-04	1	Mallorca	Es_Baccs	Olga	3	A	2	S.ocellatus	1	6
2014-06-04	1	Mallorca	Es_Baccs	Olga	3	A	2	S.ocellatus	1	6
2014-06-04	1	Mallorca	Es_Baccs	Olga	3	A	2	S.ocellatus	1	6
2014-06-04	1	Mallorca	Es_Baccs	Olga	3	A	2	S.ocellatus	1	6
2014-06-04	1	Mallorca	Es_Baccs	Olga	3	A	2	S.ocellatus	1	6
2014-06-04	1	Mallorca	Es_Baccs	Olga	3	A	2	S.ocellatus	1	4
2014-06-04	1	Mallorca	Es_Baccs	Olga	3	A	2	S.rostratus	1	10
2014-06-04	1	Mallorca	Es_Baccs	Olga	3	A	2	S.salpa	1	16
2014-06-04	1	Mallorca	Es_Baccs	Olga	3	A	2	S.salpa	1	16
2014-06-04	1	Mallorca	Es_Baccs	Olga	3	A	2	S.salpa	1	14
2014-06-04	1	Mallorca	Es_Baccs	Olga	3	A	2	S.salpa	1	12
2014-06-04	1	Mallorca	Es_Baccs	Olga	3	A	2	S.salpa	1	12
2014-06-04	1	Mallorca	Es_Baccs	Olga	3	A	2	S.salpa	1	12
2014-06-04	1	Mallorca	Es_Baccs	Olga	3	A	2	S.salpa	1	12
2014-06-04	1	Mallorca	Es_Baccs	Olga	3	A	2	S.salpa	1	12
2014-06-04	1	Mallorca	Es_Baccs	Olga	3	A	2	S.salpa	1	10
2014-06-04	1	Mallorca	Es_Baccs	Olga	3	A	2	S.salpa	1	10
2014-06-04	1	Mallorca	Es_Baccs	Olga	3	A	2	S.scriba	1	14
2014-06-04	1	Mallorca	Es_Baccs	Olga	3	A	2	S.tinca	1	16
2014-06-04	1	Mallorca	Es_Baccs	Olga	3	A	2	S.tinca	1	14
2014-06-04	1	Mallorca	Es_Baccs	Olga	3	A	2	S.tinca	1	14
2014-06-04	1	Mallorca	Es_Baccs	Olga	3	A	2	S.tinca	1	12
2014-06-04	1	Mallorca	Es_Baccs	Olga	3	A	2	S.tinca	1	12
2014-06-04	1	Mallorca	Es_Baccs	Olga	3	A	2	S.tinca	1	8
2014-06-04	1	Mallorca	Es_Baccs	Olga	3	A	2	S.tinca	1	8
2014-06-04	1	Mallorca	Es_Baccs	Olga	3	A	2	S.tinca	1	8
2014-06-04	1	Mallorca	Es_Baccs	Olga	3	A	2	S.tinca	1	10
2014-06-04	1	Mallorca	Es_Baccs	Olga	3	A	2	S.tinca	1	10
2014-06-04	1	Mallorca	Es_Baccs	Olga	3	A	2	S.tinca	1	10
2014-06-04	1	Mallorca	Es_Baccs	Olga	3	A	2	S.tinca	1	10
2014-06-04	1	Mallorca	Es_Baccs	Olga	3	A	3	C.julis	1	14
2014-06-04	1	Mallorca	Es_Baccs	Olga	3	A	3	C.julis	1	14
2014-06-04	1	Mallorca	Es_Baccs	Olga	3	A	3	C.julis	1	12
2014-06-04	1	Mallorca	Es_Baccs	Olga	3	A	3	D.annularis	1	10
2014-06-04	1	Mallorca	Es_Baccs	Olga	3	A	3	D.vulgaris	1	12
2014-06-04	1	Mallorca	Es_Baccs	Olga	3	A	3	D.vulgaris	1	12
2014-06-04	1	Mallorca	Es_Baccs	Olga	3	A	3	D.vulgaris	1	4
2014-06-04	1	Mallorca	Es_Baccs	Olga	3	A	3	D.vulgaris	1	3
2014-06-04	1	Mallorca	Es_Baccs	Olga	3	A	3	O.melanura	1	8
2014-06-04	1	Mallorca	Es_Baccs	Olga	3	A	3	O.melanura	1	8
2014-06-04	1	Mallorca	Es_Baccs	Olga	3	A	3	O.melanura	1	8
2014-06-04	1	Mallorca	Es_Baccs	Olga	3	A	3	O.melanura	1	8
2014-06-04	1	Mallorca	Es_Baccs	Olga	3	A	3	O.melanura	1	8
2014-06-04	1	Mallorca	Es_Baccs	Olga	3	A	3	O.melanura	1	8
2014-06-04	1	Mallorca	Es_Baccs	Olga	3	A	3	O.melanura	1	8
2014-06-04	1	Mallorca	Es_Baccs	Olga	3	A	3	O.melanura	1	8
2014-06-04	1	Mallorca	Es_Baccs	Olga	3	A	3	O.melanura	1	8
2014-06-04	1	Mallorca	Es_Baccs	Olga	3	A	3	O.melanura	1	8
2014-06-04	1	Mallorca	Es_Baccs	Olga	3	A	3	O.melanura	1	8
2014-06-04	1	Mallorca	Es_Baccs	Olga	3	A	3	O.melanura	1	8
2014-06-04	1	Mallorca	Es_Baccs	Olga	3	A	3	O.melanura	1	8
2014-06-04	1	Mallorca	Es_Baccs	Olga	3	A	3	O.melanura	1	8
2014-06-04	1	Mallorca	Es_Baccs	Olga	3	A	3	S.ocellatus	1	8
2014-06-04	1	Mallorca	Es_Baccs	Olga	3	A	3	S.ocellatus	1	8
2014-06-04	1	Mallorca	Es_Baccs	Olga	3	A	3	S.ocellatus	1	8
2014-06-04	1	Mallorca	Es_Baccs	Olga	3	A	3	S.ocellatus	1	8
2014-06-04	1	Mallorca	Es_Baccs	Olga	3	A	3	S.ocellatus	1	6
2014-06-04	1	Mallorca	Es_Baccs	Olga	3	A	3	S.ocellatus	1	6
2014-06-04	1	Mallorca	Es_Baccs	Olga	3	A	3	S.ocellatus	1	6
2014-06-04	1	Mallorca	Es_Baccs	Olga	3	A	3	S.ocellatus	1	6
2014-06-04	1	Mallorca	Es_Baccs	Olga	3	A	3	S.melanocercus	1	6
2014-06-04	1	Mallorca	Es_Baccs	Olga	3	A	3	S.ocellatus	1	6
2014-06-04	1	Mallorca	Es_Baccs	Olga	3	A	3	S.rostratus	1	10
2014-06-04	1	Mallorca	Es_Baccs	Olga	3	A	3	S.scriba	1	18
2014-06-04	1	Mallorca	Es_Baccs	Olga	3	A	3	S.scriba	1	14
2014-06-04	1	Mallorca	Es_Baccs	Olga	3	A	3	S.tinca	1	10
2014-06-04	1	Mallorca	Es_Baccs	Olga	3	A	3	S.tinca	1	6
2014-06-04	1	Mallorca	Es_Baccs	Joan	3	B	4	C.julis	1	10
2014-06-04	1	Mallorca	Es_Baccs	Joan	3	B	4	C.julis	1	10
2014-06-04	1	Mallorca	Es_Baccs	Joan	3	B	4	C.julis	1	8
2014-06-04	1	Mallorca	Es_Baccs	Joan	3	B	4	C.julis	1	6
2014-06-04	1	Mallorca	Es_Baccs	Joan	3	B	4	D.vulgaris	1	12
2014-06-04	1	Mallorca	Es_Baccs	Joan	3	B	4	D.vulgaris	1	10
2014-06-04	1	Mallorca	Es_Baccs	Joan	3	B	4	D.vulgaris	1	4
2014-06-04	1	Mallorca	Es_Baccs	Joan	3	B	4	D.vulgaris	1	4
2014-06-04	1	Mallorca	Es_Baccs	Joan	3	B	4	D.vulgaris	1	3
2014-06-04	1	Mallorca	Es_Baccs	Joan	3	B	4	S.cantharus	1	14
2014-06-04	1	Mallorca	Es_Baccs	Joan	3	B	4	S.cantharus	1	14
2014-06-04	1	Mallorca	Es_Baccs	Joan	3	B	4	S.mediterraneus	1	6
2014-06-04	1	Mallorca	Es_Baccs	Joan	3	B	4	S.ocellatus	1	10
2014-06-04	1	Mallorca	Es_Baccs	Joan	3	B	4	S.ocellatus	1	8
2014-06-04	1	Mallorca	Es_Baccs	Joan	3	B	4	S.ocellatus	1	6
2014-06-04	1	Mallorca	Es_Baccs	Joan	3	B	4	S.ocellatus	1	6
2014-06-04	1	Mallorca	Es_Baccs	Joan	3	B	4	S.ocellatus	1	6
2014-06-04	1	Mallorca	Es_Baccs	Joan	3	B	4	S.ocellatus	1	6
2014-06-04	1	Mallorca	Es_Baccs	Joan	3	B	4	S.ocellatus	1	6
2014-06-04	1	Mallorca	Es_Baccs	Joan	3	B	4	S.ocellatus	1	6
2014-06-04	1	Mallorca	Es_Baccs	Joan	3	B	4	S.ocellatus	1	6
2014-06-04	1	Mallorca	Es_Baccs	Joan	3	B	4	S.roisali	1	6
2014-06-04	1	Mallorca	Es_Baccs	Joan	3	B	4	S.scriba	1	14
2014-06-04	1	Mallorca	Es_Baccs	Joan	3	B	4	S.scriba	1	12
2014-06-04	1	Mallorca	Es_Baccs	Joan	3	B	4	S.scriba	1	10
2014-06-04	1	Mallorca	Es_Baccs	Joan	3	B	4	S.scriba	1	8
2014-06-04	1	Mallorca	Es_Baccs	Joan	3	B	4	S.tinca	1	10
2014-06-04	1	Mallorca	Es_Baccs	Joan	3	B	4	S.tinca	1	8
2014-06-04	1	Mallorca	Es_Baccs	Joan	3	B	4	S.tinca	1	8
2014-06-04	1	Mallorca	Es_Baccs	Joan	3	B	5	C.julis	1	12
2014-06-04	1	Mallorca	Es_Baccs	Joan	3	B	5	C.julis	1	10
2014-06-04	1	Mallorca	Es_Baccs	Joan	3	B	5	C.julis	1	8
2014-06-04	1	Mallorca	Es_Baccs	Joan	3	B	5	C.julis	1	6
2014-06-04	1	Mallorca	Es_Baccs	Joan	3	B	5	D.sargus	1	35
2014-06-04	1	Mallorca	Es_Baccs	Joan	3	B	5	D.sargus	1	25
2014-06-04	1	Mallorca	Es_Baccs	Joan	3	B	5	D.vulgaris	1	12
2014-06-04	1	Mallorca	Es_Baccs	Joan	3	B	5	D.vulgaris	1	12
2014-06-04	1	Mallorca	Es_Baccs	Joan	3	B	5	D.vulgaris	1	3
2014-06-04	1	Mallorca	Es_Baccs	Joan	3	B	5	S.mediterraneus	1	6
2014-06-04	1	Mallorca	Es_Baccs	Joan	3	B	5	S.ocellatus	1	6
2014-06-04	1	Mallorca	Es_Baccs	Joan	3	B	5	S.ocellatus	1	6
2014-06-04	1	Mallorca	Es_Baccs	Joan	3	B	5	S.ocellatus	1	6
2014-06-04	1	Mallorca	Es_Baccs	Joan	3	B	5	S.roisali	1	8
2014-06-04	1	Mallorca	Es_Baccs	Joan	3	B	5	S.rostratus	1	10
2014-06-04	1	Mallorca	Es_Baccs	Joan	3	B	5	S.rostratus	1	10
2014-06-04	1	Mallorca	Es_Baccs	Joan	3	B	5	S.scriba	1	14
2014-06-04	1	Mallorca	Es_Baccs	Joan	3	B	5	S.scriba	1	14
2014-06-04	1	Mallorca	Es_Baccs	Joan	3	B	5	S.scriba	1	8
2014-06-04	1	Mallorca	Es_Baccs	Joan	3	B	5	S.tinca	1	18
2014-06-04	1	Mallorca	Es_Baccs	Joan	3	B	5	S.tinca	1	12
2014-06-04	1	Mallorca	Es_Baccs	Joan	3	B	5	S.tinca	1	10
2014-06-04	1	Mallorca	Es_Baccs	Joan	3	B	5	S.tinca	1	8
2014-06-04	1	Mallorca	Es_Baccs	Joan	3	B	5	S.tinca	1	8
2014-06-04	1	Mallorca	Es_Baccs	Joan	3	B	5	S.tinca	1	8
2014-06-04	1	Mallorca	Es_Baccs	Joan	3	B	5	S.tinca	1	8
2014-06-04	1	Mallorca	Es_Baccs	Joan	3	B	5	S.tinca	1	8
2014-06-04	1	Mallorca	Es_Baccs	Joan	3	B	5	S.tinca	1	8
2014-06-04	1	Mallorca	Es_Baccs	Joan	3	B	5	S.tinca	1	8
2014-06-04	1	Mallorca	Es_Baccs	Joan	3	B	5	S.tinca	1	8
2014-06-04	1	Mallorca	Es_Baccs	Joan	3	B	5	S.tinca	1	8
2014-06-04	1	Mallorca	Es_Baccs	Joan	3	B	5	S.tinca	1	8
2014-06-04	1	Mallorca	Es_Baccs	Joan	3	B	5	S.tinca	1	8
2014-06-04	1	Mallorca	Es_Baccs	Joan	3	B	5	S.tinca	1	8
2014-06-04	1	Mallorca	Es_Baccs	Joan	3	B	6	C.julis	1	12
2014-06-04	1	Mallorca	Es_Baccs	Joan	3	B	6	C.julis	1	12
2014-06-04	1	Mallorca	Es_Baccs	Joan	3	B	6	C.julis	1	12
2014-06-04	1	Mallorca	Es_Baccs	Joan	3	B	6	C.julis	1	10
2014-06-04	1	Mallorca	Es_Baccs	Joan	3	B	6	C.julis	1	8
2014-06-04	1	Mallorca	Es_Baccs	Joan	3	B	6	C.julis	1	6
2014-06-04	1	Mallorca	Es_Baccs	Joan	3	B	6	C.julis	1	6
2014-06-04	1	Mallorca	Es_Baccs	Joan	3	B	6	D.sargus	1	20
2014-06-04	1	Mallorca	Es_Baccs	Joan	3	B	6	D.vulgaris	1	5
2014-06-04	1	Mallorca	Es_Baccs	Joan	3	B	6	D.vulgaris	1	4
2014-06-04	1	Mallorca	Es_Baccs	Joan	3	B	6	D.vulgaris	1	4
2014-06-04	1	Mallorca	Es_Baccs	Joan	3	B	6	D.vulgaris	1	4
2014-06-04	1	Mallorca	Es_Baccs	Joan	3	B	6	D.vulgaris	1	4
2014-06-04	1	Mallorca	Es_Baccs	Joan	3	B	6	S.ocellatus	1	8
2014-06-04	1	Mallorca	Es_Baccs	Joan	3	B	6	S.ocellatus	1	8
2014-06-04	1	Mallorca	Es_Baccs	Joan	3	B	6	S.ocellatus	1	6
2014-06-04	1	Mallorca	Es_Baccs	Joan	3	B	6	S.ocellatus	1	6
2014-06-04	1	Mallorca	Es_Baccs	Joan	3	B	6	S.ocellatus	1	6
2014-06-04	1	Mallorca	Es_Baccs	Joan	3	B	6	S.ocellatus	1	6
2014-06-04	1	Mallorca	Es_Baccs	Joan	3	B	6	S.ocellatus	1	6
2014-06-04	1	Mallorca	Es_Baccs	Joan	3	B	6	S.ocellatus	1	6
2014-06-04	1	Mallorca	Es_Baccs	Joan	3	B	6	S.ocellatus	1	6
2014-06-04	1	Mallorca	Es_Baccs	Joan	3	B	6	S.rostratus	1	6
2014-06-04	1	Mallorca	Es_Baccs	Joan	3	B	6	S.scriba	1	8
2014-06-04	1	Mallorca	Es_Baccs	Joan	3	B	6	S.tinca	1	14
2014-06-04	1	Mallorca	Es_Baccs	Joan	3	B	6	S.tinca	1	10
2014-06-04	1	Mallorca	Es_Baccs	Joan	3	B	6	S.tinca	1	8
2014-06-04	1	Mallorca	Es_Baccs	Joan	3	B	6	S.tinca	1	8
2014-06-04	1	Mallorca	Es_Baccs	Joan	3	B	6	S.tinca	1	8
2014-06-04	1	Mallorca	Es_Baccs	Joan	3	B	6	S.tinca	1	8
2014-06-04	1	Mallorca	Es_Baccs	Joan	3	B	6	T.pavo	1	10
2014-06-04	1	Mallorca	Es_Baccs	Joan	3	B	6	T.pavo	1	8
2014-06-05	1	Mallorca	Sant_elm	Olga	4	A	1	C.julis	1	12
2014-06-05	1	Mallorca	Sant_elm	Olga	4	A	1	C.julis	1	8
2014-06-05	1	Mallorca	Sant_elm	Olga	4	A	1	C.julis	1	8
2014-06-05	1	Mallorca	Sant_elm	Olga	4	A	1	C.julis	1	6
2014-06-05	1	Mallorca	Sant_elm	Olga	4	A	1	C.julis	1	6
2014-06-05	1	Mallorca	Sant_elm	Olga	4	A	1	D.sargus	1	14
2014-06-05	1	Mallorca	Sant_elm	Olga	4	A	1	D.sargus	1	14
2014-06-05	1	Mallorca	Sant_elm	Olga	4	A	1	D.sargus	1	14
2014-06-05	1	Mallorca	Sant_elm	Olga	4	A	1	D.sargus	1	10
2014-06-05	1	Mallorca	Sant_elm	Olga	4	A	1	D.sargus	1	10
2014-06-05	1	Mallorca	Sant_elm	Olga	4	A	1	D.vulgaris	1	18
2014-06-05	1	Mallorca	Sant_elm	Olga	4	A	1	D.vulgaris	1	16
2014-06-05	1	Mallorca	Sant_elm	Olga	4	A	1	D.vulgaris	1	14
2014-06-05	1	Mallorca	Sant_elm	Olga	4	A	1	D.vulgaris	1	10
2014-06-05	1	Mallorca	Sant_elm	Olga	4	A	1	D.vulgaris	1	10
2014-06-05	1	Mallorca	Sant_elm	Olga	4	A	1	D.vulgaris	1	10
2014-06-05	1	Mallorca	Sant_elm	Olga	4	A	1	M.surmuletus	1	18
2014-06-05	1	Mallorca	Sant_elm	Olga	4	A	1	S.melanocercus	1	8
2014-06-05	1	Mallorca	Sant_elm	Olga	4	A	1	S.ocellatus	1	6
2014-06-05	1	Mallorca	Sant_elm	Olga	4	A	1	S.ocellatus	1	6
2014-06-05	1	Mallorca	Sant_elm	Olga	4	A	1	S.ocellatus	1	6
2014-06-05	1	Mallorca	Sant_elm	Olga	4	A	1	S.roisali	1	8
2014-06-05	1	Mallorca	Sant_elm	Olga	4	A	1	S.scriba	1	14
2014-06-05	1	Mallorca	Sant_elm	Olga	4	A	1	S.scriba	1	12
2014-06-05	1	Mallorca	Sant_elm	Olga	4	A	1	S.scriba	1	12
2014-06-05	1	Mallorca	Sant_elm	Olga	4	A	1	S.scriba	1	12
2014-06-05	1	Mallorca	Sant_elm	Olga	4	A	1	S.tinca	1	14
2014-06-05	1	Mallorca	Sant_elm	Olga	4	A	1	S.tinca	1	12
2014-06-05	1	Mallorca	Sant_elm	Olga	4	A	1	S.tinca	1	12
2014-06-05	1	Mallorca	Sant_elm	Olga	4	A	1	S.tinca	1	10
2014-06-05	1	Mallorca	Sant_elm	Olga	4	A	1	S.tinca	1	10
2014-06-05	1	Mallorca	Sant_elm	Olga	4	A	1	S.tinca	1	10
2014-06-05	1	Mallorca	Sant_elm	Olga	4	A	2	C.julis	1	14
2014-06-05	1	Mallorca	Sant_elm	Olga	4	A	2	C.julis	1	8
2014-06-05	1	Mallorca	Sant_elm	Olga	4	A	2	C.julis	1	8
2014-06-05	1	Mallorca	Sant_elm	Olga	4	A	2	C.julis	1	6
2014-06-05	1	Mallorca	Sant_elm	Olga	4	A	2	D.vulgaris	1	18
2014-06-05	1	Mallorca	Sant_elm	Olga	4	A	2	D.vulgaris	1	12
2014-06-05	1	Mallorca	Sant_elm	Olga	4	A	2	D.vulgaris	1	12
2014-06-05	1	Mallorca	Sant_elm	Olga	4	A	2	D.vulgaris	1	12
2014-06-05	1	Mallorca	Sant_elm	Olga	4	A	2	D.vulgaris	1	12
2014-06-05	1	Mallorca	Sant_elm	Olga	4	A	2	D.vulgaris	1	10
2014-06-05	1	Mallorca	Sant_elm	Olga	4	A	2	S.ocellatus	1	6
2014-06-05	1	Mallorca	Sant_elm	Olga	4	A	2	S.ocellatus	1	6
2014-06-05	1	Mallorca	Sant_elm	Olga	4	A	2	S.ocellatus	1	6
2014-06-05	1	Mallorca	Sant_elm	Olga	4	A	2	S.scriba	1	12
2014-06-05	1	Mallorca	Sant_elm	Olga	4	A	2	S.tinca	1	16
2014-06-05	1	Mallorca	Sant_elm	Olga	4	A	2	S.tinca	1	14
2014-06-05	1	Mallorca	Sant_elm	Olga	4	A	3	C.julis	1	14
2014-06-05	1	Mallorca	Sant_elm	Olga	4	A	3	C.julis	1	10
2014-06-05	1	Mallorca	Sant_elm	Olga	4	A	3	C.julis	1	8
2014-06-05	1	Mallorca	Sant_elm	Olga	4	A	3	C.julis	1	8
2014-06-05	1	Mallorca	Sant_elm	Olga	4	A	3	C.julis	1	6
2014-06-05	1	Mallorca	Sant_elm	Olga	4	A	3	C.julis	1	6
2014-06-05	1	Mallorca	Sant_elm	Olga	4	A	3	C.julis	1	6
2014-06-05	1	Mallorca	Sant_elm	Olga	4	A	3	D.vulgaris	1	14
2014-06-05	1	Mallorca	Sant_elm	Olga	4	A	3	D.vulgaris	1	10
2014-06-05	1	Mallorca	Sant_elm	Olga	4	A	3	D.vulgaris	1	10
2014-06-05	1	Mallorca	Sant_elm	Olga	4	A	3	S.melanocercus	1	8
2014-06-05	1	Mallorca	Sant_elm	Olga	4	A	3	S.ocellatus	1	10
2014-06-05	1	Mallorca	Sant_elm	Olga	4	A	3	S.ocellatus	1	8
2014-06-05	1	Mallorca	Sant_elm	Olga	4	A	3	S.ocellatus	1	8
2014-06-05	1	Mallorca	Sant_elm	Olga	4	A	3	S.rostratus	1	10
2014-06-05	1	Mallorca	Sant_elm	Olga	4	A	3	S.scriba	1	10
2014-06-05	1	Mallorca	Sant_elm	Olga	4	A	3	S.tinca	1	14
2014-06-05	1	Mallorca	Sant_elm	Olga	4	A	3	S.tinca	1	14
2014-06-05	1	Mallorca	Sant_elm	Olga	4	A	3	S.tinca	1	10
2014-06-05	1	Mallorca	Sant_elm	Olga	4	A	3	S.tinca	1	10
2014-06-05	1	Mallorca	Sant_elm	Olga	4	A	3	S.tinca	1	10
2014-06-05	1	Mallorca	Sant_elm	Olga	4	A	3	S.tinca	1	10
2014-06-05	1	Mallorca	Sant_elm	Olga	4	A	3	S.tinca	1	10
2014-06-05	1	Mallorca	Sant_elm	Olga	4	A	3	S.tinca	1	10
2014-06-05	1	Mallorca	Sant_elm	Olga	4	A	3	S.tinca	1	10
2014-06-05	1	Mallorca	Sant_elm	Joan	4	B	4	C.julis	1	12
2014-06-05	1	Mallorca	Sant_elm	Joan	4	B	4	C.julis	1	10
2014-06-05	1	Mallorca	Sant_elm	Joan	4	B	4	C.julis	1	8
2014-06-05	1	Mallorca	Sant_elm	Joan	4	B	4	C.julis	1	8
2014-06-05	1	Mallorca	Sant_elm	Joan	4	B	4	C.julis	1	6
2014-06-05	1	Mallorca	Sant_elm	Joan	4	B	4	D.annularis	1	12
2014-06-05	1	Mallorca	Sant_elm	Joan	4	B	4	D.annularis	1	12
2014-06-05	1	Mallorca	Sant_elm	Joan	4	B	4	D.annularis	1	10
2014-06-05	1	Mallorca	Sant_elm	Joan	4	B	4	D.sargus	1	22
2014-06-05	1	Mallorca	Sant_elm	Joan	4	B	4	D.sargus	1	20
2014-06-05	1	Mallorca	Sant_elm	Joan	4	B	4	D.sargus	1	18
2014-06-05	1	Mallorca	Sant_elm	Joan	4	B	4	D.vulgaris	1	12
2014-06-05	1	Mallorca	Sant_elm	Joan	4	B	4	D.vulgaris	1	10
2014-06-05	1	Mallorca	Sant_elm	Joan	4	B	4	D.vulgaris	1	10
2014-06-05	1	Mallorca	Sant_elm	Joan	4	B	4	D.vulgaris	1	4
2014-06-05	1	Mallorca	Sant_elm	Joan	4	B	4	L.merula	1	34
2014-06-05	1	Mallorca	Sant_elm	Joan	4	B	4	S.melanocercus	1	6
2014-06-05	1	Mallorca	Sant_elm	Joan	4	B	4	S.ocellatus	1	10
2014-06-05	1	Mallorca	Sant_elm	Joan	4	B	4	S.ocellatus	1	8
2014-06-05	1	Mallorca	Sant_elm	Joan	4	B	4	S.ocellatus	1	8
2014-06-05	1	Mallorca	Sant_elm	Joan	4	B	4	S.roisali	1	8
2014-06-05	1	Mallorca	Sant_elm	Joan	4	B	4	S.salpa	1	10
2014-06-05	1	Mallorca	Sant_elm	Joan	4	B	4	S.salpa	1	10
2014-06-05	1	Mallorca	Sant_elm	Joan	4	B	4	S.salpa	1	10
2014-06-05	1	Mallorca	Sant_elm	Joan	4	B	4	S.salpa	1	10
2014-06-05	1	Mallorca	Sant_elm	Joan	4	B	4	S.salpa	1	10
2014-06-05	1	Mallorca	Sant_elm	Joan	4	B	4	S.salpa	1	10
2014-06-05	1	Mallorca	Sant_elm	Joan	4	B	4	S.salpa	1	10
2014-06-05	1	Mallorca	Sant_elm	Joan	4	B	4	S.salpa	1	10
2014-06-05	1	Mallorca	Sant_elm	Joan	4	B	4	S.salpa	1	10
2014-06-05	1	Mallorca	Sant_elm	Joan	4	B	4	S.salpa	1	10
2014-06-05	1	Mallorca	Sant_elm	Joan	4	B	4	S.salpa	1	10
2014-06-05	1	Mallorca	Sant_elm	Joan	4	B	4	S.salpa	1	10
2014-06-05	1	Mallorca	Sant_elm	Joan	4	B	4	S.salpa	1	10
2014-06-05	1	Mallorca	Sant_elm	Joan	4	B	4	S.salpa	1	10
2014-06-05	1	Mallorca	Sant_elm	Joan	4	B	4	S.salpa	1	10
2014-06-05	1	Mallorca	Sant_elm	Joan	4	B	4	S.salpa	1	10
2014-06-05	1	Mallorca	Sant_elm	Joan	4	B	4	S.salpa	1	10
2014-06-05	1	Mallorca	Sant_elm	Joan	4	B	4	S.salpa	1	10
2014-06-05	1	Mallorca	Sant_elm	Joan	4	B	4	S.salpa	1	10
2014-06-05	1	Mallorca	Sant_elm	Joan	4	B	4	S.salpa	1	10
2014-06-05	1	Mallorca	Sant_elm	Joan	4	B	4	S.salpa	1	10
2014-06-05	1	Mallorca	Sant_elm	Joan	4	B	4	S.salpa	1	10
2014-06-05	1	Mallorca	Sant_elm	Joan	4	B	4	S.salpa	1	10
2014-06-05	1	Mallorca	Sant_elm	Joan	4	B	4	S.salpa	1	10
2014-06-05	1	Mallorca	Sant_elm	Joan	4	B	4	S.salpa	1	10
2014-06-05	1	Mallorca	Sant_elm	Joan	4	B	4	S.salpa	1	10
2014-06-05	1	Mallorca	Sant_elm	Joan	4	B	4	S.salpa	1	10
2014-06-05	1	Mallorca	Sant_elm	Joan	4	B	4	S.salpa	1	10
2014-06-05	1	Mallorca	Sant_elm	Joan	4	B	4	S.salpa	1	10
2014-06-05	1	Mallorca	Sant_elm	Joan	4	B	4	S.salpa	1	10
2014-06-05	1	Mallorca	Sant_elm	Joan	4	B	4	S.salpa	1	10
2014-06-05	1	Mallorca	Sant_elm	Joan	4	B	4	S.scriba	1	18
2014-06-05	1	Mallorca	Sant_elm	Joan	4	B	4	S.scriba	1	14
2014-06-05	1	Mallorca	Sant_elm	Joan	4	B	4	S.scriba	1	14
2014-06-05	1	Mallorca	Sant_elm	Joan	4	B	4	S.scriba	1	14
2014-06-05	1	Mallorca	Sant_elm	Joan	4	B	4	S.scriba	1	14
2014-06-05	1	Mallorca	Sant_elm	Joan	4	B	4	S.scriba	1	12
2014-06-05	1	Mallorca	Sant_elm	Joan	4	B	4	S.tinca	1	22
2014-06-05	1	Mallorca	Sant_elm	Joan	4	B	4	S.tinca	1	18
2014-06-05	1	Mallorca	Sant_elm	Joan	4	B	4	S.tinca	1	14
2014-06-05	1	Mallorca	Sant_elm	Joan	4	B	4	S.tinca	1	14
2014-06-05	1	Mallorca	Sant_elm	Joan	4	B	4	S.tinca	1	12
2014-06-05	1	Mallorca	Sant_elm	Joan	4	B	4	S.tinca	1	12
2014-06-05	1	Mallorca	Sant_elm	Joan	4	B	4	S.tinca	1	10
2014-06-05	1	Mallorca	Sant_elm	Joan	4	B	4	S.tinca	1	10
2014-06-05	1	Mallorca	Sant_elm	Joan	4	B	4	S.tinca	1	10
2014-06-05	1	Mallorca	Sant_elm	Joan	4	B	4	S.tinca	1	10
2014-06-05	1	Mallorca	Sant_elm	Joan	4	B	4	S.tinca	1	10
2014-06-05	1	Mallorca	Sant_elm	Joan	4	B	4	S.tinca	1	10
2014-06-05	1	Mallorca	Sant_elm	Joan	4	B	4	S.tinca	1	10
2014-06-05	1	Mallorca	Sant_elm	Joan	4	B	4	S.tinca	1	10
2014-06-05	1	Mallorca	Sant_elm	Joan	4	B	4	T.pavo	1	12
2014-06-05	1	Mallorca	Sant_elm	Joan	4	B	4	T.pavo	1	10
2014-06-05	1	Mallorca	Sant_elm	Joan	4	B	5	C.julis	1	12
2014-06-05	1	Mallorca	Sant_elm	Joan	4	B	5	C.julis	1	10
2014-06-05	1	Mallorca	Sant_elm	Joan	4	B	5	C.julis	1	10
2014-06-05	1	Mallorca	Sant_elm	Joan	4	B	5	C.julis	1	10
2014-06-05	1	Mallorca	Sant_elm	Joan	4	B	5	C.julis	1	10
2014-06-05	1	Mallorca	Sant_elm	Joan	4	B	5	C.julis	1	10
2014-06-05	1	Mallorca	Sant_elm	Joan	4	B	5	C.julis	1	10
2014-06-05	1	Mallorca	Sant_elm	Joan	4	B	5	C.julis	1	10
2014-06-05	1	Mallorca	Sant_elm	Joan	4	B	5	C.julis	1	8
2014-06-05	1	Mallorca	Sant_elm	Joan	4	B	5	C.julis	1	8
2014-06-05	1	Mallorca	Sant_elm	Joan	4	B	5	C.julis	1	8
2014-06-05	1	Mallorca	Sant_elm	Joan	4	B	5	C.julis	1	8
2014-06-05	1	Mallorca	Sant_elm	Joan	4	B	5	C.julis	1	8
2014-06-05	1	Mallorca	Sant_elm	Joan	4	B	5	C.julis	1	8
2014-06-05	1	Mallorca	Sant_elm	Joan	4	B	5	D.annularis	1	12
2014-06-05	1	Mallorca	Sant_elm	Joan	4	B	5	D.annularis	1	8
2014-06-05	1	Mallorca	Sant_elm	Joan	4	B	5	D.sargus	1	14
2014-06-05	1	Mallorca	Sant_elm	Joan	4	B	5	D.sargus	1	14
2014-06-05	1	Mallorca	Sant_elm	Joan	4	B	5	D.sargus	1	12
2014-06-05	1	Mallorca	Sant_elm	Joan	4	B	5	D.sargus	1	12
2014-06-05	1	Mallorca	Sant_elm	Joan	4	B	5	D.sargus	1	12
2014-06-05	1	Mallorca	Sant_elm	Joan	4	B	5	D.sargus	1	12
2014-06-05	1	Mallorca	Sant_elm	Joan	4	B	5	D.sargus	1	12
2014-06-05	1	Mallorca	Sant_elm	Joan	4	B	5	S.mediterraneus	1	12
2014-06-05	1	Mallorca	Sant_elm	Joan	4	B	5	S.mediterraneus	1	8
2014-06-05	1	Mallorca	Sant_elm	Joan	4	B	5	S.ocellatus	1	12
2014-06-05	1	Mallorca	Sant_elm	Joan	4	B	5	S.ocellatus	1	12
2014-06-05	1	Mallorca	Sant_elm	Joan	4	B	5	S.ocellatus	1	10
2014-06-05	1	Mallorca	Sant_elm	Joan	4	B	5	S.ocellatus	1	10
2014-06-05	1	Mallorca	Sant_elm	Joan	4	B	5	S.ocellatus	1	8
2014-06-05	1	Mallorca	Sant_elm	Joan	4	B	5	S.ocellatus	1	8
2014-06-05	1	Mallorca	Sant_elm	Joan	4	B	5	S.ocellatus	1	8
2014-06-05	1	Mallorca	Sant_elm	Joan	4	B	5	S.rostratus	1	10
2014-06-05	1	Mallorca	Sant_elm	Joan	4	B	5	S.scriba	1	14
2014-06-05	1	Mallorca	Sant_elm	Joan	4	B	5	S.tinca	1	18
2014-06-05	1	Mallorca	Sant_elm	Joan	4	B	5	S.tinca	1	12
2014-06-05	1	Mallorca	Sant_elm	Joan	4	B	6	C.julis	1	10
2014-06-05	1	Mallorca	Sant_elm	Joan	4	B	6	C.julis	1	10
2014-06-05	1	Mallorca	Sant_elm	Joan	4	B	6	C.julis	1	10
2014-06-05	1	Mallorca	Sant_elm	Joan	4	B	6	C.julis	1	10
2014-06-05	1	Mallorca	Sant_elm	Joan	4	B	6	C.julis	1	10
2014-06-05	1	Mallorca	Sant_elm	Joan	4	B	6	C.julis	1	8
2014-06-05	1	Mallorca	Sant_elm	Joan	4	B	6	C.julis	1	8
2014-06-05	1	Mallorca	Sant_elm	Joan	4	B	6	C.julis	1	8
2014-06-05	1	Mallorca	Sant_elm	Joan	4	B	6	D.annularis	1	10
2014-06-05	1	Mallorca	Sant_elm	Joan	4	B	6	D.puntazzo	1	16
2014-06-05	1	Mallorca	Sant_elm	Joan	4	B	6	D.sargus	1	14
2014-06-05	1	Mallorca	Sant_elm	Joan	4	B	6	D.sargus	1	12
2014-06-05	1	Mallorca	Sant_elm	Joan	4	B	6	D.sargus	1	12
2014-06-05	1	Mallorca	Sant_elm	Joan	4	B	6	D.sargus	1	12
2014-06-05	1	Mallorca	Sant_elm	Joan	4	B	6	D.sargus	1	12
2014-06-05	1	Mallorca	Sant_elm	Joan	4	B	6	D.sargus	1	12
2014-06-05	1	Mallorca	Sant_elm	Joan	4	B	6	D.vulgaris	1	14
2014-06-05	1	Mallorca	Sant_elm	Joan	4	B	6	D.vulgaris	1	14
2014-06-05	1	Mallorca	Sant_elm	Joan	4	B	6	D.vulgaris	1	14
2014-06-05	1	Mallorca	Sant_elm	Joan	4	B	6	D.vulgaris	1	14
2014-06-05	1	Mallorca	Sant_elm	Joan	4	B	6	D.vulgaris	1	12
2014-06-05	1	Mallorca	Sant_elm	Joan	4	B	6	D.vulgaris	1	12
2014-06-05	1	Mallorca	Sant_elm	Joan	4	B	6	D.vulgaris	1	12
2014-06-05	1	Mallorca	Sant_elm	Joan	4	B	6	D.vulgaris	1	12
2014-06-05	1	Mallorca	Sant_elm	Joan	4	B	6	D.vulgaris	1	12
2014-06-05	1	Mallorca	Sant_elm	Joan	4	B	6	D.vulgaris	1	12
2014-06-05	1	Mallorca	Sant_elm	Joan	4	B	6	D.vulgaris	1	12
2014-06-05	1	Mallorca	Sant_elm	Joan	4	B	6	D.vulgaris	1	10
2014-06-05	1	Mallorca	Sant_elm	Joan	4	B	6	D.vulgaris	1	10
2014-06-05	1	Mallorca	Sant_elm	Joan	4	B	6	D.vulgaris	1	10
2014-06-05	1	Mallorca	Sant_elm	Joan	4	B	6	D.vulgaris	1	10
2014-06-05	1	Mallorca	Sant_elm	Joan	4	B	6	D.vulgaris	1	10
2014-06-05	1	Mallorca	Sant_elm	Joan	4	B	6	O.melanura	1	6
2014-06-05	1	Mallorca	Sant_elm	Joan	4	B	6	O.melanura	1	6
2014-06-05	1	Mallorca	Sant_elm	Joan	4	B	6	O.melanura	1	6
2014-06-05	1	Mallorca	Sant_elm	Joan	4	B	6	O.melanura	1	6
2014-06-05	1	Mallorca	Sant_elm	Joan	4	B	6	O.melanura	1	6
2014-06-05	1	Mallorca	Sant_elm	Joan	4	B	6	O.melanura	1	6
2014-06-05	1	Mallorca	Sant_elm	Joan	4	B	6	O.melanura	1	6
2014-06-05	1	Mallorca	Sant_elm	Joan	4	B	6	O.melanura	1	6
2014-06-05	1	Mallorca	Sant_elm	Joan	4	B	6	O.melanura	1	6
2014-06-05	1	Mallorca	Sant_elm	Joan	4	B	6	O.melanura	1	6
2014-06-05	1	Mallorca	Sant_elm	Joan	4	B	6	S.mediterraneus	1	12
2014-06-05	1	Mallorca	Sant_elm	Joan	4	B	6	S.ocellatus	1	10
2014-06-05	1	Mallorca	Sant_elm	Joan	4	B	6	S.ocellatus	1	10
2014-06-05	1	Mallorca	Sant_elm	Joan	4	B	6	S.ocellatus	1	8
2014-06-05	1	Mallorca	Sant_elm	Joan	4	B	6	S.roisali	1	8
2014-06-05	1	Mallorca	Sant_elm	Joan	4	B	6	S.roisali	1	8
2014-06-05	1	Mallorca	Sant_elm	Joan	4	B	6	S.roisali	1	6
2014-06-05	1	Mallorca	Sant_elm	Joan	4	B	6	S.rostratus	1	12
2014-06-05	1	Mallorca	Sant_elm	Joan	4	B	6	S.rostratus	1	10
2014-06-05	1	Mallorca	Sant_elm	Joan	4	B	6	S.scriba	1	12
2014-06-05	1	Mallorca	Sant_elm	Joan	4	B	6	S.scriba	1	10
2014-06-05	1	Mallorca	Sant_elm	Joan	4	B	6	S.scriba	1	16
2014-06-05	1	Mallorca	Sant_elm	Joan	4	B	6	S.tinca	1	24
2014-06-05	1	Mallorca	Sant_elm	Joan	4	B	6	S.tinca	1	14
2014-06-05	1	Mallorca	Sant_elm	Joan	4	B	6	S.tinca	1	14
2014-06-05	1	Mallorca	Sant_elm	Joan	4	B	6	S.tinca	1	12
2014-06-05	1	Mallorca	Sant_elm	Joan	4	B	6	S.tinca	1	12
2014-06-05	1	Mallorca	Sant_elm	Joan	4	B	6	S.tinca	1	12
2014-06-05	1	Mallorca	Sant_elm	Joan	4	B	6	T.pavo	1	10
2014-06-05	1	Mallorca	Sant_elm	Joan	4	B	6	T.pavo	1	10
2014-06-05	1	Mallorca	Sant_elm	Joan	4	B	6	T.pavo	1	8
2014-06-05	1	Mallorca	Sant_elm	Joan	4	B	6	T.pavo	1	6
2014-06-05	1	Mallorca	Sant_elm	Joan	4	B	6	T.pavo	1	8
2014-06-06	1	Mallorca	Llump	Olga	5	A	1	C.julis	1	12
2014-06-06	1	Mallorca	Llump	Olga	5	A	1	C.julis	1	12
2014-06-06	1	Mallorca	Llump	Olga	5	A	1	C.julis	1	10
2014-06-06	1	Mallorca	Llump	Olga	5	A	1	C.julis	1	8
2014-06-06	1	Mallorca	Llump	Olga	5	A	1	C.julis	1	8
2014-06-06	1	Mallorca	Llump	Olga	5	A	1	C.julis	1	8
2014-06-06	1	Mallorca	Llump	Olga	5	A	1	C.julis	1	8
2014-06-06	1	Mallorca	Llump	Olga	5	A	1	C.julis	1	8
2014-06-06	1	Mallorca	Llump	Olga	5	A	1	C.julis	1	6
2014-06-06	1	Mallorca	Llump	Olga	5	A	1	C.julis	1	6
2014-06-06	1	Mallorca	Llump	Olga	5	A	1	C.julis	1	6
2014-06-06	1	Mallorca	Llump	Olga	5	A	1	C.julis	1	6
2014-06-06	1	Mallorca	Llump	Olga	5	A	1	C.julis	1	6
2014-06-06	1	Mallorca	Llump	Olga	5	A	1	C.julis	1	6
2014-06-06	1	Mallorca	Llump	Olga	5	A	1	D.annularis	1	12
2014-06-06	1	Mallorca	Llump	Olga	5	A	1	D.annularis	1	8
2014-06-06	1	Mallorca	Llump	Olga	5	A	1	D.sargus	1	12
2014-06-06	1	Mallorca	Llump	Olga	5	A	1	D.sargus	1	10
2014-06-06	1	Mallorca	Llump	Olga	5	A	1	D.vulgaris	1	12
2014-06-06	1	Mallorca	Llump	Olga	5	A	1	D.vulgaris	1	10
2014-06-06	1	Mallorca	Llump	Olga	5	A	1	D.vulgaris	1	10
2014-06-06	1	Mallorca	Llump	Olga	5	A	1	D.vulgaris	1	10
2014-06-06	1	Mallorca	Llump	Olga	5	A	1	D.vulgaris	1	10
2014-06-06	1	Mallorca	Llump	Olga	5	A	1	D.vulgaris	1	4
2014-06-06	1	Mallorca	Llump	Olga	5	A	1	S.mediterraneus	1	8
2014-06-06	1	Mallorca	Llump	Olga	5	A	1	S.mediterraneus	1	8
2014-06-06	1	Mallorca	Llump	Olga	5	A	1	S.mediterraneus	1	6
2014-06-06	1	Mallorca	Llump	Olga	5	A	1	S.ocellatus	1	6
2014-06-06	1	Mallorca	Llump	Olga	5	A	1	S.ocellatus	1	6
2014-06-06	1	Mallorca	Llump	Olga	5	A	1	S.scriba	1	12
2014-06-06	1	Mallorca	Llump	Olga	5	A	1	S.tinca	1	16
2014-06-06	1	Mallorca	Llump	Olga	5	A	1	S.tinca	1	14
2014-06-06	1	Mallorca	Llump	Olga	5	A	2	A.imberbis	1	8
2014-06-06	1	Mallorca	Llump	Olga	5	A	2	A.imberbis	1	6
2014-06-06	1	Mallorca	Llump	Olga	5	A	2	A.imberbis	1	6
2014-06-06	1	Mallorca	Llump	Olga	5	A	2	A.imberbis	1	6
2014-06-06	1	Mallorca	Llump	Olga	5	A	2	A.imberbis	1	4
2014-06-06	1	Mallorca	Llump	Olga	5	A	2	C.julis	1	12
2014-06-06	1	Mallorca	Llump	Olga	5	A	2	C.julis	1	12
2014-06-06	1	Mallorca	Llump	Olga	5	A	2	C.julis	1	8
2014-06-06	1	Mallorca	Llump	Olga	5	A	2	C.julis	1	8
2014-06-06	1	Mallorca	Llump	Olga	5	A	2	C.julis	1	8
2014-06-06	1	Mallorca	Llump	Olga	5	A	2	C.julis	1	6
2014-06-06	1	Mallorca	Llump	Olga	5	A	2	C.julis	1	6
2014-06-06	1	Mallorca	Llump	Olga	5	A	2	C.julis	1	6
2014-06-06	1	Mallorca	Llump	Olga	5	A	2	D.vulgaris	1	12
2014-06-06	1	Mallorca	Llump	Olga	5	A	2	D.vulgaris	1	12
2014-06-06	1	Mallorca	Llump	Olga	5	A	2	D.vulgaris	1	10
2014-06-06	1	Mallorca	Llump	Olga	5	A	2	D.vulgaris	1	10
2014-06-06	1	Mallorca	Llump	Olga	5	A	2	D.vulgaris	1	10
2014-06-06	1	Mallorca	Llump	Olga	5	A	2	D.vulgaris	1	10
2014-06-06	1	Mallorca	Llump	Olga	5	A	2	D.vulgaris	1	4
2014-06-06	1	Mallorca	Llump	Olga	5	A	2	D.vulgaris	1	4
2014-06-06	1	Mallorca	Llump	Olga	5	A	2	D.vulgaris	1	4
2014-06-06	1	Mallorca	Llump	Olga	5	A	2	S.mediterraneus	1	6
2014-06-06	1	Mallorca	Llump	Olga	5	A	2	S.melanocercus	1	8
2014-06-06	1	Mallorca	Llump	Olga	5	A	2	S.ocellatus	1	8
2014-06-06	1	Mallorca	Llump	Olga	5	A	2	S.roisali	1	8
2014-06-06	1	Mallorca	Llump	Olga	5	A	2	S.roisali	1	6
2014-06-06	1	Mallorca	Llump	Olga	5	A	2	S.salpa	1	10
2014-06-06	1	Mallorca	Llump	Olga	5	A	2	S.salpa	1	10
2014-06-06	1	Mallorca	Llump	Olga	5	A	2	S.salpa	1	10
2014-06-06	1	Mallorca	Llump	Olga	5	A	2	S.salpa	1	10
2014-06-06	1	Mallorca	Llump	Olga	5	A	2	S.salpa	1	10
2014-06-06	1	Mallorca	Llump	Olga	5	A	2	S.salpa	1	10
2014-06-06	1	Mallorca	Llump	Olga	5	A	2	S.salpa	1	10
2014-06-06	1	Mallorca	Llump	Olga	5	A	2	S.scriba	1	14
2014-06-06	1	Mallorca	Llump	Olga	5	A	2	S.scriba	1	10
2014-06-06	1	Mallorca	Llump	Olga	5	A	2	S.tinca	1	14
2014-06-06	1	Mallorca	Llump	Olga	5	A	2	S.tinca	1	12
2014-06-06	1	Mallorca	Llump	Olga	5	A	2	S.tinca	1	12
2014-06-06	1	Mallorca	Llump	Olga	5	A	2	S.tinca	1	10
2014-06-06	1	Mallorca	Llump	Olga	5	A	2	O.melanura	1	10
2014-06-06	1	Mallorca	Llump	Olga	5	A	2	O.melanura	1	10
2014-06-06	1	Mallorca	Llump	Olga	5	A	2	O.melanura	1	10
2014-06-06	1	Mallorca	Llump	Olga	5	A	2	O.melanura	1	10
2014-06-06	1	Mallorca	Llump	Olga	5	A	2	O.melanura	1	10
2014-06-06	1	Mallorca	Llump	Olga	5	A	2	O.melanura	1	10
2014-06-06	1	Mallorca	Llump	Olga	5	A	2	O.melanura	1	10
2014-06-06	1	Mallorca	Llump	Olga	5	A	2	O.melanura	1	10
2014-06-06	1	Mallorca	Llump	Olga	5	A	2	O.melanura	1	10
2014-06-06	1	Mallorca	Llump	Olga	5	A	2	O.melanura	1	10
2014-06-06	1	Mallorca	Llump	Olga	5	A	2	T.pavo	1	10
2014-06-06	1	Mallorca	Llump	Olga	5	A	3	C.julis	1	10
2014-06-06	1	Mallorca	Llump	Olga	5	A	3	C.julis	1	8
2014-06-06	1	Mallorca	Llump	Olga	5	A	3	C.julis	1	8
2014-06-06	1	Mallorca	Llump	Olga	5	A	3	C.julis	1	6
2014-06-06	1	Mallorca	Llump	Olga	5	A	3	C.julis	1	6
2014-06-06	1	Mallorca	Llump	Olga	5	A	3	C.julis	1	6
2014-06-06	1	Mallorca	Llump	Olga	5	A	3	C.julis	1	6
2014-06-06	1	Mallorca	Llump	Olga	5	A	3	C.julis	1	6
2014-06-06	1	Mallorca	Llump	Olga	5	A	3	C.julis	1	6
2014-06-06	1	Mallorca	Llump	Olga	5	A	3	C.julis	1	6
2014-06-06	1	Mallorca	Llump	Olga	5	A	3	C.julis	1	6
2014-06-06	1	Mallorca	Llump	Olga	5	A	3	C.julis	1	6
2014-06-06	1	Mallorca	Llump	Olga	5	A	3	D.annularis	1	12
2014-06-06	1	Mallorca	Llump	Olga	5	A	3	D.vulgaris	1	12
2014-06-06	1	Mallorca	Llump	Olga	5	A	3	D.vulgaris	1	12
2014-06-06	1	Mallorca	Llump	Olga	5	A	3	D.vulgaris	1	12
2014-06-06	1	Mallorca	Llump	Olga	5	A	3	D.vulgaris	1	12
2014-06-06	1	Mallorca	Llump	Olga	5	A	3	D.vulgaris	1	10
2014-06-06	1	Mallorca	Llump	Olga	5	A	3	D.vulgaris	1	10
2014-06-06	1	Mallorca	Llump	Olga	5	A	3	D.vulgaris	1	5
2014-06-06	1	Mallorca	Llump	Olga	5	A	3	D.vulgaris	1	4
2014-06-06	1	Mallorca	Llump	Olga	5	A	3	D.vulgaris	1	4
2014-06-06	1	Mallorca	Llump	Olga	5	A	3	S.ocellatus	1	8
2014-06-06	1	Mallorca	Llump	Olga	5	A	3	S.ocellatus	1	6
2014-06-06	1	Mallorca	Llump	Olga	5	A	3	S.ocellatus	1	6
2014-06-06	1	Mallorca	Llump	Olga	5	A	3	S.ocellatus	1	6
2014-06-06	1	Mallorca	Llump	Olga	5	A	3	S.ocellatus	1	6
2014-06-06	1	Mallorca	Llump	Olga	5	A	3	S.ocellatus	1	6
2014-06-06	1	Mallorca	Llump	Olga	5	A	3	S.ocellatus	1	6
2014-06-06	1	Mallorca	Llump	Olga	5	A	3	S.ocellatus	1	6
2014-06-06	1	Mallorca	Llump	Olga	5	A	3	S.ocellatus	1	6
2014-06-06	1	Mallorca	Llump	Olga	5	A	3	S.ocellatus	1	6
2014-06-06	1	Mallorca	Llump	Olga	5	A	3	S.ocellatus	1	6
2014-06-06	1	Mallorca	Llump	Olga	5	A	3	S.ocellatus	1	6
2014-06-06	1	Mallorca	Llump	Olga	5	A	3	S.roisali	1	10
2014-06-06	1	Mallorca	Llump	Olga	5	A	3	S.roisali	1	8
2014-06-06	1	Mallorca	Llump	Olga	5	A	3	S.scriba	1	14
2014-06-06	1	Mallorca	Llump	Olga	5	A	3	S.scriba	1	14
2014-06-06	1	Mallorca	Llump	Olga	5	A	3	S.scriba	1	8
2014-06-06	1	Mallorca	Llump	Olga	5	A	3	S.tinca	1	14
2014-06-06	1	Mallorca	Llump	Olga	5	A	3	S.tinca	1	14
2014-06-06	1	Mallorca	Llump	Olga	5	A	3	S.tinca	1	12
2014-06-06	1	Mallorca	Llump	Olga	5	A	3	S.tinca	1	10
2014-06-06	1	Mallorca	Llump	Olga	5	A	3	T.pavo	1	8
2014-06-06	1	Mallorca	Llump	Joan	5	B	4	C.julis	1	12
2014-06-06	1	Mallorca	Llump	Joan	5	B	4	C.julis	1	10
2014-06-06	1	Mallorca	Llump	Joan	5	B	4	C.julis	1	8
2014-06-06	1	Mallorca	Llump	Joan	5	B	4	C.julis	1	8
2014-06-06	1	Mallorca	Llump	Joan	5	B	4	C.julis	1	6
2014-06-06	1	Mallorca	Llump	Joan	5	B	4	C.julis	1	6
2014-06-06	1	Mallorca	Llump	Joan	5	B	4	D.annularis	1	14
2014-06-06	1	Mallorca	Llump	Joan	5	B	4	D.annularis	1	10
2014-06-06	1	Mallorca	Llump	Joan	5	B	4	D.sargus	1	14
2014-06-06	1	Mallorca	Llump	Joan	5	B	4	D.vulgaris	1	4
2014-06-06	1	Mallorca	Llump	Joan	5	B	4	S.melanocercus	1	6
2014-06-06	1	Mallorca	Llump	Joan	5	B	4	S.mediterraneus	1	10
2014-06-06	1	Mallorca	Llump	Joan	5	B	4	S.mediterraneus	1	8
2014-06-06	1	Mallorca	Llump	Joan	5	B	4	S.ocellatus	1	10
2014-06-06	1	Mallorca	Llump	Joan	5	B	4	S.ocellatus	1	8
2014-06-06	1	Mallorca	Llump	Joan	5	B	4	S.ocellatus	1	6
2014-06-06	1	Mallorca	Llump	Joan	5	B	4	S.ocellatus	1	6
2014-06-06	1	Mallorca	Llump	Joan	5	B	4	S.ocellatus	1	6
2014-06-06	1	Mallorca	Llump	Joan	5	B	4	S.ocellatus	1	6
2014-06-06	1	Mallorca	Llump	Joan	5	B	4	S.ocellatus	1	6
2014-06-06	1	Mallorca	Llump	Joan	5	B	4	S.roisali	1	8
2014-06-06	1	Mallorca	Llump	Joan	5	B	4	S.roisali	1	8
2014-06-06	1	Mallorca	Llump	Joan	5	B	4	S.roisali	1	6
2014-06-06	1	Mallorca	Llump	Joan	5	B	4	S.scriba	1	14
2014-06-06	1	Mallorca	Llump	Joan	5	B	4	S.tinca	1	16
2014-06-06	1	Mallorca	Llump	Joan	5	B	4	S.tinca	1	12
2014-06-06	1	Mallorca	Llump	Joan	5	B	4	S.tinca	1	12
2014-06-06	1	Mallorca	Llump	Joan	5	B	5	C.julis	1	8
2014-06-06	1	Mallorca	Llump	Joan	5	B	5	C.julis	1	8
2014-06-06	1	Mallorca	Llump	Joan	5	B	5	D.annularis	1	12
2014-06-06	1	Mallorca	Llump	Joan	5	B	5	D.annularis	1	10
2014-06-06	1	Mallorca	Llump	Joan	5	B	5	D.annularis	1	8
2014-06-06	1	Mallorca	Llump	Joan	5	B	5	D.annularis	1	6
2014-06-06	1	Mallorca	Llump	Joan	5	B	5	D.vulgaris	1	12
2014-06-06	1	Mallorca	Llump	Joan	5	B	5	S.melanocercus	1	8
2014-06-06	1	Mallorca	Llump	Joan	5	B	5	S.melanocercus	1	6
2014-06-06	1	Mallorca	Llump	Joan	5	B	5	S.ocellatus	1	8
2014-06-06	1	Mallorca	Llump	Joan	5	B	5	S.ocellatus	1	6
2014-06-06	1	Mallorca	Llump	Joan	5	B	5	S.ocellatus	1	6
2014-06-06	1	Mallorca	Llump	Joan	5	B	5	S.ocellatus	1	6
2014-06-06	1	Mallorca	Llump	Joan	5	B	5	S.ocellatus	1	6
2014-06-06	1	Mallorca	Llump	Joan	5	B	5	S.ocellatus	1	6
2014-06-06	1	Mallorca	Llump	Joan	5	B	5	S.roisali	1	8
2014-06-06	1	Mallorca	Llump	Joan	5	B	5	S.scriba	1	18
2014-06-06	1	Mallorca	Llump	Joan	5	B	5	S.tinca	1	20
2014-06-06	1	Mallorca	Llump	Joan	5	B	5	S.tinca	1	14
2014-06-06	1	Mallorca	Llump	Joan	5	B	5	S.tinca	1	12
2014-06-06	1	Mallorca	Llump	Joan	5	B	5	S.tinca	1	12
2014-06-06	1	Mallorca	Llump	Joan	5	B	5	S.tinca	1	12
2014-06-06	1	Mallorca	Llump	Joan	5	B	5	S.tinca	1	12
2014-06-06	1	Mallorca	Llump	Joan	5	B	5	S.tinca	1	12
2014-06-06	1	Mallorca	Llump	Joan	5	B	5	S.tinca	1	10
2014-06-06	1	Mallorca	Llump	Joan	5	B	5	S.tinca	1	8
2014-06-06	1	Mallorca	Llump	Joan	5	B	5	T.pavo	1	8
2014-06-06	1	Mallorca	Llump	Joan	5	B	6	C.julis	1	8
2014-06-06	1	Mallorca	Llump	Joan	5	B	6	D.annularis	1	12
2014-06-06	1	Mallorca	Llump	Joan	5	B	6	D.vulgaris	1	4
2014-06-06	1	Mallorca	Llump	Joan	5	B	6	S.ocellatus	1	10
2014-06-06	1	Mallorca	Llump	Joan	5	B	6	S.ocellatus	1	8
2014-06-06	1	Mallorca	Llump	Joan	5	B	6	S.ocellatus	1	8
2014-06-06	1	Mallorca	Llump	Joan	5	B	6	S.ocellatus	1	8
2014-06-06	1	Mallorca	Llump	Joan	5	B	6	S.roisali	1	14
2014-06-06	1	Mallorca	Llump	Joan	5	B	6	S.roisali	1	10
2014-06-06	1	Mallorca	Llump	Joan	5	B	6	S.roisali	1	10
2014-06-06	1	Mallorca	Llump	Joan	5	B	6	S.roisali	1	8
2014-06-06	1	Mallorca	Llump	Joan	5	B	6	S.roisali	1	6
2014-06-06	1	Mallorca	Llump	Joan	5	B	6	S.rostratus	1	12
2014-06-06	1	Mallorca	Llump	Joan	5	B	6	S.scriba	1	12
2014-06-06	1	Mallorca	Llump	Joan	5	B	6	S.tinca	1	20
2014-06-06	1	Mallorca	Llump	Joan	5	B	6	T.pavo	1	10
2014-06-07	1	Mallorca	Malgrats	Olga	6	A	1	C.julis	1	12
2014-06-07	1	Mallorca	Malgrats	Olga	6	A	1	C.julis	1	10
2014-06-07	1	Mallorca	Malgrats	Olga	6	A	1	C.julis	1	10
2014-06-07	1	Mallorca	Malgrats	Olga	6	A	1	C.julis	1	10
2014-06-07	1	Mallorca	Malgrats	Olga	6	A	1	C.julis	1	8
2014-06-07	1	Mallorca	Malgrats	Olga	6	A	1	C.julis	1	8
2014-06-07	1	Mallorca	Malgrats	Olga	6	A	1	C.julis	1	6
2014-06-07	1	Mallorca	Malgrats	Olga	6	A	1	C.julis	1	6
2014-06-07	1	Mallorca	Malgrats	Olga	6	A	1	C.julis	1	6
2014-06-07	1	Mallorca	Malgrats	Olga	6	A	1	D.sargus	1	20
2014-06-07	1	Mallorca	Malgrats	Olga	6	A	1	D.vulgaris	1	18
2014-06-07	1	Mallorca	Malgrats	Olga	6	A	1	D.vulgaris	1	20
2014-06-07	1	Mallorca	Malgrats	Olga	6	A	1	D.vulgaris	1	20
2014-06-07	1	Mallorca	Malgrats	Olga	6	A	1	D.vulgaris	1	22
2014-06-07	1	Mallorca	Malgrats	Olga	6	A	1	D.vulgaris	1	12
2014-06-07	1	Mallorca	Malgrats	Olga	6	A	1	D.vulgaris	1	10
2014-06-07	1	Mallorca	Malgrats	Olga	6	A	1	D.vulgaris	1	4
2014-06-07	1	Mallorca	Malgrats	Olga	6	A	1	S.ocellatus	1	8
2014-06-07	1	Mallorca	Malgrats	Olga	6	A	1	S.scriba	1	10
2014-06-07	1	Mallorca	Malgrats	Olga	6	A	1	S.scriba	1	10
2014-06-07	1	Mallorca	Malgrats	Olga	6	A	1	S.smaris	1	8
2014-06-07	1	Mallorca	Malgrats	Olga	6	A	1	S.smaris	1	8
2014-06-07	1	Mallorca	Malgrats	Olga	6	A	1	S.smaris	1	8
2014-06-07	1	Mallorca	Malgrats	Olga	6	A	1	S.smaris	1	8
2014-06-07	1	Mallorca	Malgrats	Olga	6	A	1	S.smaris	1	8
2014-06-07	1	Mallorca	Malgrats	Olga	6	A	1	S.smaris	1	8
2014-06-07	1	Mallorca	Malgrats	Olga	6	A	1	S.smaris	1	8
2014-06-07	1	Mallorca	Malgrats	Olga	6	A	1	S.smaris	1	8
2014-06-07	1	Mallorca	Malgrats	Olga	6	A	1	S.smaris	1	8
2014-06-07	1	Mallorca	Malgrats	Olga	6	A	1	S.smaris	1	8
2014-06-07	1	Mallorca	Malgrats	Olga	6	A	1	S.smaris	1	8
2014-06-07	1	Mallorca	Malgrats	Olga	6	A	1	S.smaris	1	8
2014-06-07	1	Mallorca	Malgrats	Olga	6	A	1	S.smaris	1	8
2014-06-07	1	Mallorca	Malgrats	Olga	6	A	1	S.smaris	1	8
2014-06-07	1	Mallorca	Malgrats	Olga	6	A	1	S.smaris	1	8
2014-06-07	1	Mallorca	Malgrats	Olga	6	A	1	S.smaris	1	8
2014-06-07	1	Mallorca	Malgrats	Olga	6	A	1	S.smaris	1	8
2014-06-07	1	Mallorca	Malgrats	Olga	6	A	1	S.smaris	1	8
2014-06-07	1	Mallorca	Malgrats	Olga	6	A	1	S.smaris	1	8
2014-06-07	1	Mallorca	Malgrats	Olga	6	A	1	S.smaris	1	8
2014-06-07	1	Mallorca	Malgrats	Olga	6	A	1	S.smaris	1	8
2014-06-07	1	Mallorca	Malgrats	Olga	6	A	1	S.smaris	1	8
2014-06-07	1	Mallorca	Malgrats	Olga	6	A	1	S.smaris	1	8
2014-06-07	1	Mallorca	Malgrats	Olga	6	A	1	S.smaris	1	8
2014-06-07	1	Mallorca	Malgrats	Olga	6	A	1	S.smaris	1	8
2014-06-07	1	Mallorca	Malgrats	Olga	6	A	1	S.smaris	1	8
2014-06-07	1	Mallorca	Malgrats	Olga	6	A	1	S.smaris	1	8
2014-06-07	1	Mallorca	Malgrats	Olga	6	A	1	S.smaris	1	8
2014-06-07	1	Mallorca	Malgrats	Olga	6	A	1	S.smaris	1	8
2014-06-07	1	Mallorca	Malgrats	Olga	6	A	1	S.smaris	1	8
2014-06-07	1	Mallorca	Malgrats	Olga	6	A	1	S.smaris	1	8
2014-06-07	1	Mallorca	Malgrats	Olga	6	A	1	S.smaris	1	8
2014-06-07	1	Mallorca	Malgrats	Olga	6	A	1	S.smaris	1	8
2014-06-07	1	Mallorca	Malgrats	Olga	6	A	1	S.smaris	1	8
2014-06-07	1	Mallorca	Malgrats	Olga	6	A	1	S.smaris	1	8
2014-06-07	1	Mallorca	Malgrats	Olga	6	A	1	S.smaris	1	8
2014-06-07	1	Mallorca	Malgrats	Olga	6	A	1	S.smaris	1	8
2014-06-07	1	Mallorca	Malgrats	Olga	6	A	1	S.smaris	1	8
2014-06-07	1	Mallorca	Malgrats	Olga	6	A	1	S.smaris	1	8
2014-06-07	1	Mallorca	Malgrats	Olga	6	A	1	S.smaris	1	8
2014-06-07	1	Mallorca	Malgrats	Olga	6	A	1	S.tinca	1	20
2014-06-07	1	Mallorca	Malgrats	Olga	6	A	1	T.pavo	1	10
2014-06-07	1	Mallorca	Malgrats	Olga	6	A	1	T.pavo	1	10
2014-06-07	1	Mallorca	Malgrats	Olga	6	A	1	T.pavo	1	10
2014-06-07	1	Mallorca	Malgrats	Olga	6	A	1	T.pavo	1	8
2014-06-07	1	Mallorca	Malgrats	Olga	6	A	2	C.julis	1	10
2014-06-07	1	Mallorca	Malgrats	Olga	6	A	2	C.julis	1	6
2014-06-07	1	Mallorca	Malgrats	Olga	6	A	2	C.julis	1	6
2014-06-07	1	Mallorca	Malgrats	Olga	6	A	2	C.julis	1	6
2014-06-07	1	Mallorca	Malgrats	Olga	6	A	2	C.julis	1	6
2014-06-07	1	Mallorca	Malgrats	Olga	6	A	2	C.julis	1	6
2014-06-07	1	Mallorca	Malgrats	Olga	6	A	2	C.julis	1	6
2014-06-07	1	Mallorca	Malgrats	Olga	6	A	2	C.julis	1	6
2014-06-07	1	Mallorca	Malgrats	Olga	6	A	2	C.julis	1	6
2014-06-07	1	Mallorca	Malgrats	Olga	6	A	2	D.sargus	1	18
2014-06-07	1	Mallorca	Malgrats	Olga	6	A	2	D.sargus	1	12
2014-06-07	1	Mallorca	Malgrats	Olga	6	A	2	D.vulgaris	1	16
2014-06-07	1	Mallorca	Malgrats	Olga	6	A	2	D.vulgaris	1	16
2014-06-07	1	Mallorca	Malgrats	Olga	6	A	2	D.vulgaris	1	12
2014-06-07	1	Mallorca	Malgrats	Olga	6	A	2	D.vulgaris	1	12
2014-06-07	1	Mallorca	Malgrats	Olga	6	A	2	D.vulgaris	1	10
2014-06-07	1	Mallorca	Malgrats	Olga	6	A	2	D.vulgaris	1	4
2014-06-07	1	Mallorca	Malgrats	Olga	6	A	2	S.mediterraneus	1	8
2014-06-07	1	Mallorca	Malgrats	Olga	6	A	2	S.ocellatus	1	8
2014-06-07	1	Mallorca	Malgrats	Olga	6	A	2	S.ocellatus	1	8
2014-06-07	1	Mallorca	Malgrats	Olga	6	A	2	S.ocellatus	1	8
2014-06-07	1	Mallorca	Malgrats	Olga	6	A	2	S.ocellatus	1	8
2014-06-07	1	Mallorca	Malgrats	Olga	6	A	2	S.ocellatus	1	8
2014-06-07	1	Mallorca	Malgrats	Olga	6	A	2	S.ocellatus	1	6
2014-06-07	1	Mallorca	Malgrats	Olga	6	A	2	S.ocellatus	1	6
2014-06-07	1	Mallorca	Malgrats	Olga	6	A	2	S.ocellatus	1	6
2014-06-07	1	Mallorca	Malgrats	Olga	6	A	2	S.ocellatus	1	6
2014-06-07	1	Mallorca	Malgrats	Olga	6	A	2	S.scriba	1	12
2014-06-07	1	Mallorca	Malgrats	Olga	6	A	2	S.scriba	1	10
2014-06-07	1	Mallorca	Malgrats	Olga	6	A	2	S.scriba	1	10
2014-06-07	1	Mallorca	Malgrats	Olga	6	A	2	S.tinca	1	18
2014-06-07	1	Mallorca	Malgrats	Olga	6	A	2	S.tinca	1	8
2014-06-07	1	Mallorca	Malgrats	Olga	6	A	2	T.pavo	1	8
2014-06-07	1	Mallorca	Malgrats	Olga	6	A	3	C.julis	1	12
2014-06-07	1	Mallorca	Malgrats	Olga	6	A	3	C.julis	1	12
2014-06-07	1	Mallorca	Malgrats	Olga	6	A	3	C.julis	1	10
2014-06-07	1	Mallorca	Malgrats	Olga	6	A	3	C.julis	1	6
2014-06-07	1	Mallorca	Malgrats	Olga	6	A	3	D.annularis	1	10
2014-06-07	1	Mallorca	Malgrats	Olga	6	A	3	D.annularis	1	10
2014-06-07	1	Mallorca	Malgrats	Olga	6	A	3	D.annularis	1	8
2014-06-07	1	Mallorca	Malgrats	Olga	6	A	3	D.annularis	1	8
2014-06-07	1	Mallorca	Malgrats	Olga	6	A	3	D.annularis	1	8
2014-06-07	1	Mallorca	Malgrats	Olga	6	A	3	D.annularis	1	8
2014-06-07	1	Mallorca	Malgrats	Olga	6	A	3	D.puntazzo	1	22
2014-06-07	1	Mallorca	Malgrats	Olga	6	A	3	D.sargus	1	14
2014-06-07	1	Mallorca	Malgrats	Olga	6	A	3	D.vulgaris	1	14
2014-06-07	1	Mallorca	Malgrats	Olga	6	A	3	D.vulgaris	1	12
2014-06-07	1	Mallorca	Malgrats	Olga	6	A	3	D.vulgaris	1	12
2014-06-07	1	Mallorca	Malgrats	Olga	6	A	3	D.vulgaris	1	4
2014-06-07	1	Mallorca	Malgrats	Olga	6	A	3	D.vulgaris	1	4
2014-06-07	1	Mallorca	Malgrats	Olga	6	A	3	D.vulgaris	1	4
2014-06-07	1	Mallorca	Malgrats	Olga	6	A	3	D.vulgaris	1	4
2014-06-07	1	Mallorca	Malgrats	Olga	6	A	3	D.vulgaris	1	4
2014-06-07	1	Mallorca	Malgrats	Olga	6	A	3	D.vulgaris	1	3
2014-06-07	1	Mallorca	Malgrats	Olga	6	A	3	S.melanocercus	1	8
2014-06-07	1	Mallorca	Malgrats	Olga	6	A	3	S.melanocercus	1	6
2014-06-07	1	Mallorca	Malgrats	Olga	6	A	3	S.ocellatus	1	8
2014-06-07	1	Mallorca	Malgrats	Olga	6	A	3	S.ocellatus	1	8
2014-06-07	1	Mallorca	Malgrats	Olga	6	A	3	S.ocellatus	1	8
2014-06-07	1	Mallorca	Malgrats	Olga	6	A	3	S.ocellatus	1	8
2014-06-07	1	Mallorca	Malgrats	Olga	6	A	3	S.ocellatus	1	8
2014-06-07	1	Mallorca	Malgrats	Olga	6	A	3	S.ocellatus	1	6
2014-06-07	1	Mallorca	Malgrats	Olga	6	A	3	S.ocellatus	1	6
2014-06-07	1	Mallorca	Malgrats	Olga	6	A	3	S.roisali	1	8
2014-06-07	1	Mallorca	Malgrats	Olga	6	A	3	S.rostratus	1	10
2014-06-07	1	Mallorca	Malgrats	Olga	6	A	3	S.rostratus	1	8
2014-06-07	1	Mallorca	Malgrats	Olga	6	A	3	S.salpa	1	18
2014-06-07	1	Mallorca	Malgrats	Olga	6	A	3	S.scriba	1	12
2014-06-07	1	Mallorca	Malgrats	Olga	6	A	3	S.scriba	1	12
2014-06-07	1	Mallorca	Malgrats	Olga	6	A	3	S.scriba	1	10
2014-06-07	1	Mallorca	Malgrats	Olga	6	A	3	S.tinca	1	22
2014-06-07	1	Mallorca	Malgrats	Olga	6	A	3	S.tinca	1	18
2014-06-07	1	Mallorca	Malgrats	Olga	6	A	3	S.tinca	1	16
2014-06-07	1	Mallorca	Malgrats	Olga	6	A	3	S.tinca	1	12
2014-06-07	1	Mallorca	Malgrats	Olga	6	A	3	S.tinca	1	12
2014-06-07	1	Mallorca	Malgrats	Joan	6	B	4	A.imberbis	1	8
2014-06-07	1	Mallorca	Malgrats	Joan	6	B	4	A.imberbis	1	8
2014-06-07	1	Mallorca	Malgrats	Joan	6	B	4	C.julis	1	11
2014-06-07	1	Mallorca	Malgrats	Joan	6	B	4	C.julis	1	10
2014-06-07	1	Mallorca	Malgrats	Joan	6	B	4	C.julis	1	8
2014-06-07	1	Mallorca	Malgrats	Joan	6	B	4	C.julis	1	8
2014-06-07	1	Mallorca	Malgrats	Joan	6	B	4	C.julis	1	8
2014-06-07	1	Mallorca	Malgrats	Joan	6	B	4	C.julis	1	8
2014-06-07	1	Mallorca	Malgrats	Joan	6	B	4	D.annularis	1	14
2014-06-07	1	Mallorca	Malgrats	Joan	6	B	4	D.annularis	1	14
2014-06-07	1	Mallorca	Malgrats	Joan	6	B	4	D.annularis	1	14
2014-06-07	1	Mallorca	Malgrats	Joan	6	B	4	D.annularis	1	14
2014-06-07	1	Mallorca	Malgrats	Joan	6	B	4	D.annularis	1	12
2014-06-07	1	Mallorca	Malgrats	Joan	6	B	4	D.puntazzo	1	14
2014-06-07	1	Mallorca	Malgrats	Joan	6	B	4	D.sargus	1	12
2014-06-07	1	Mallorca	Malgrats	Joan	6	B	4	S.cantharus	1	16
2014-06-07	1	Mallorca	Malgrats	Joan	6	B	4	S.melanocercus	1	8
2014-06-07	1	Mallorca	Malgrats	Joan	6	B	4	S.melanocercus	1	8
2014-06-07	1	Mallorca	Malgrats	Joan	6	B	4	S.ocellatus	1	12
2014-06-07	1	Mallorca	Malgrats	Joan	6	B	4	S.ocellatus	1	10
2014-06-07	1	Mallorca	Malgrats	Joan	6	B	4	S.ocellatus	1	10
2014-06-07	1	Mallorca	Malgrats	Joan	6	B	4	S.ocellatus	1	10
2014-06-07	1	Mallorca	Malgrats	Joan	6	B	4	S.ocellatus	1	8
2014-06-07	1	Mallorca	Malgrats	Joan	6	B	4	S.ocellatus	1	8
2014-06-07	1	Mallorca	Malgrats	Joan	6	B	4	S.ocellatus	1	8
2014-06-07	1	Mallorca	Malgrats	Joan	6	B	4	S.ocellatus	1	8
2014-06-07	1	Mallorca	Malgrats	Joan	6	B	4	S.roisali	1	8
2014-06-07	1	Mallorca	Malgrats	Joan	6	B	4	S.rostratus	1	10
2014-06-07	1	Mallorca	Malgrats	Joan	6	B	4	S.scriba	1	14
2014-06-07	1	Mallorca	Malgrats	Joan	6	B	4	S.scriba	1	14
2014-06-07	1	Mallorca	Malgrats	Joan	6	B	4	S.scriba	1	12
2014-06-07	1	Mallorca	Malgrats	Joan	6	B	4	S.scriba	1	8
2014-06-07	1	Mallorca	Malgrats	Joan	6	B	4	S.tinca	1	24
2014-06-07	1	Mallorca	Malgrats	Joan	6	B	4	S.tinca	1	16
2014-06-07	1	Mallorca	Malgrats	Joan	6	B	4	S.tinca	1	14
2014-06-07	1	Mallorca	Malgrats	Joan	6	B	4	S.tinca	1	14
2014-06-07	1	Mallorca	Malgrats	Joan	6	B	4	S.tinca	1	12
2014-06-07	1	Mallorca	Malgrats	Joan	6	B	4	T.pavo	1	8
2014-06-07	1	Mallorca	Malgrats	Joan	6	B	4	T.pavo	1	8
2014-06-07	1	Mallorca	Malgrats	Joan	6	B	5	A.imberbis	1	12
2014-06-07	1	Mallorca	Malgrats	Joan	6	B	5	A.imberbis	1	10
2014-06-07	1	Mallorca	Malgrats	Joan	6	B	5	A.imberbis	1	10
2014-06-07	1	Mallorca	Malgrats	Joan	6	B	5	C.julis	1	12
2014-06-07	1	Mallorca	Malgrats	Joan	6	B	5	C.julis	1	10
2014-06-07	1	Mallorca	Malgrats	Joan	6	B	5	C.julis	1	10
2014-06-07	1	Mallorca	Malgrats	Joan	6	B	5	C.julis	1	10
2014-06-07	1	Mallorca	Malgrats	Joan	6	B	5	C.julis	1	10
2014-06-07	1	Mallorca	Malgrats	Joan	6	B	5	C.julis	1	10
2014-06-07	1	Mallorca	Malgrats	Joan	6	B	5	C.julis	1	8
2014-06-07	1	Mallorca	Malgrats	Joan	6	B	5	C.julis	1	6
2014-06-07	1	Mallorca	Malgrats	Joan	6	B	5	D.annularis	1	12
2014-06-07	1	Mallorca	Malgrats	Joan	6	B	5	D.annularis	1	12
2014-06-07	1	Mallorca	Malgrats	Joan	6	B	5	D.annularis	1	10
2014-06-07	1	Mallorca	Malgrats	Joan	6	B	5	D.annularis	1	6
2014-06-07	1	Mallorca	Malgrats	Joan	6	B	5	D.annularis	1	6
2014-06-07	1	Mallorca	Malgrats	Joan	6	B	5	D.sargus	1	28
2014-06-07	1	Mallorca	Malgrats	Joan	6	B	5	D.sargus	1	28
2014-06-07	1	Mallorca	Malgrats	Joan	6	B	5	D.vulgaris	1	12
2014-06-07	1	Mallorca	Malgrats	Joan	6	B	5	D.vulgaris	1	12
2014-06-07	1	Mallorca	Malgrats	Joan	6	B	5	D.vulgaris	1	12
2014-06-07	1	Mallorca	Malgrats	Joan	6	B	5	D.vulgaris	1	12
2014-06-07	1	Mallorca	Malgrats	Joan	6	B	5	D.vulgaris	1	12
2014-06-07	1	Mallorca	Malgrats	Joan	6	B	5	D.vulgaris	1	12
2014-06-07	1	Mallorca	Malgrats	Joan	6	B	5	D.vulgaris	1	12
2014-06-07	1	Mallorca	Malgrats	Joan	6	B	5	D.vulgaris	1	12
2014-06-07	1	Mallorca	Malgrats	Joan	6	B	5	D.vulgaris	1	12
2014-06-07	1	Mallorca	Malgrats	Joan	6	B	5	D.vulgaris	1	12
2014-06-07	1	Mallorca	Malgrats	Joan	6	B	5	D.vulgaris	1	12
2014-06-07	1	Mallorca	Malgrats	Joan	6	B	5	D.vulgaris	1	12
2014-06-07	1	Mallorca	Malgrats	Joan	6	B	5	D.vulgaris	1	12
2014-06-07	1	Mallorca	Malgrats	Joan	6	B	5	D.vulgaris	1	12
2014-06-07	1	Mallorca	Malgrats	Joan	6	B	5	D.vulgaris	1	12
2014-06-07	1	Mallorca	Malgrats	Joan	6	B	5	D.vulgaris	1	10
2014-06-07	1	Mallorca	Malgrats	Joan	6	B	5	S.ocellatus	1	10
2014-06-07	1	Mallorca	Malgrats	Joan	6	B	5	S.ocellatus	1	10
2014-06-07	1	Mallorca	Malgrats	Joan	6	B	5	S.ocellatus	1	10
2014-06-07	1	Mallorca	Malgrats	Joan	6	B	5	S.ocellatus	1	10
2014-06-07	1	Mallorca	Malgrats	Joan	6	B	5	S.ocellatus	1	8
2014-06-07	1	Mallorca	Malgrats	Joan	6	B	5	S.rostratus	1	10
2014-06-07	1	Mallorca	Malgrats	Joan	6	B	5	S.scriba	1	14
2014-06-07	1	Mallorca	Malgrats	Joan	6	B	5	S.scriba	1	12
2014-06-07	1	Mallorca	Malgrats	Joan	6	B	5	S.tinca	1	24
2014-06-07	1	Mallorca	Malgrats	Joan	6	B	5	S.tinca	1	14
2014-06-07	1	Mallorca	Malgrats	Joan	6	B	5	S.tinca	1	14
2014-06-07	1	Mallorca	Malgrats	Joan	6	B	5	S.tinca	1	12
2014-06-07	1	Mallorca	Malgrats	Joan	6	B	5	S.tinca	1	10
2014-06-07	1	Mallorca	Malgrats	Joan	6	B	5	S.tinca	1	10
2014-06-07	1	Mallorca	Malgrats	Joan	6	B	5	S.tinca	1	10
2014-06-07	1	Mallorca	Malgrats	Joan	6	B	5	T.pavo	1	8
2014-06-07	1	Mallorca	Malgrats	Joan	6	B	6	A.imberbis	1	10
2014-06-07	1	Mallorca	Malgrats	Joan	6	B	6	C.julis	1	8
2014-06-07	1	Mallorca	Malgrats	Joan	6	B	6	C.julis	1	12
2014-06-07	1	Mallorca	Malgrats	Joan	6	B	6	C.julis	1	12
2014-06-07	1	Mallorca	Malgrats	Joan	6	B	6	C.julis	1	12
2014-06-07	1	Mallorca	Malgrats	Joan	6	B	6	C.julis	1	10
2014-06-07	1	Mallorca	Malgrats	Joan	6	B	6	C.julis	1	10
2014-06-07	1	Mallorca	Malgrats	Joan	6	B	6	C.julis	1	6
2014-06-07	1	Mallorca	Malgrats	Joan	6	B	6	D.annularis	1	12
2014-06-07	1	Mallorca	Malgrats	Joan	6	B	6	D.vulgaris	1	14
2014-06-07	1	Mallorca	Malgrats	Joan	6	B	6	D.vulgaris	1	12
2014-06-07	1	Mallorca	Malgrats	Joan	6	B	6	D.vulgaris	1	12
2014-06-07	1	Mallorca	Malgrats	Joan	6	B	6	D.vulgaris	1	12
2014-06-07	1	Mallorca	Malgrats	Joan	6	B	6	L.viridis	1	18
2014-06-07	1	Mallorca	Malgrats	Joan	6	B	6	S.ocellatus	1	10
2014-06-07	1	Mallorca	Malgrats	Joan	6	B	6	S.ocellatus	1	10
2014-06-07	1	Mallorca	Malgrats	Joan	6	B	6	S.ocellatus	1	8
2014-06-07	1	Mallorca	Malgrats	Joan	6	B	6	S.roisali	1	10
2014-06-07	1	Mallorca	Malgrats	Joan	6	B	6	S.rostratus	1	10
2014-06-07	1	Mallorca	Malgrats	Joan	6	B	6	S.scriba	1	12
2014-06-07	1	Mallorca	Malgrats	Joan	6	B	6	S.scriba	1	12
2014-06-07	1	Mallorca	Malgrats	Joan	6	B	6	S.tinca	1	14
2014-06-07	1	Mallorca	Malgrats	Joan	6	B	6	S.tinca	1	14
2014-06-07	1	Mallorca	Malgrats	Joan	6	B	6	T.pavo	1	12
2014-06-07	1	Mallorca	Malgrats	Joan	6	B	6	T.pavo	1	10
2014-06-07	1	Mallorca	Malgrats	Joan	6	B	6	T.pavo	1	8
2014-06-08	1	Mallorca	Quixal	Olga	7	A	1	C.julis	1	12
2014-06-08	1	Mallorca	Quixal	Olga	7	A	1	C.julis	1	12
2014-06-08	1	Mallorca	Quixal	Olga	7	A	1	C.julis	1	8
2014-06-08	1	Mallorca	Quixal	Olga	7	A	1	C.julis	1	8
2014-06-08	1	Mallorca	Quixal	Olga	7	A	1	C.julis	1	8
2014-06-08	1	Mallorca	Quixal	Olga	7	A	1	C.julis	1	8
2014-06-08	1	Mallorca	Quixal	Olga	7	A	1	C.julis	1	6
2014-06-08	1	Mallorca	Quixal	Olga	7	A	1	D.annularis	1	12
2014-06-08	1	Mallorca	Quixal	Olga	7	A	1	D.annularis	1	10
2014-06-08	1	Mallorca	Quixal	Olga	7	A	1	D.sargus	1	12
2014-06-08	1	Mallorca	Quixal	Olga	7	A	1	D.sargus	1	10
2014-06-08	1	Mallorca	Quixal	Olga	7	A	1	D.sargus	1	10
2014-06-08	1	Mallorca	Quixal	Olga	7	A	1	D.vulgaris	1	12
2014-06-08	1	Mallorca	Quixal	Olga	7	A	1	D.vulgaris	1	12
2014-06-08	1	Mallorca	Quixal	Olga	7	A	1	S.mediterraneus	1	6
2014-06-08	1	Mallorca	Quixal	Olga	7	A	1	S.ocellatus	1	8
2014-06-08	1	Mallorca	Quixal	Olga	7	A	1	S.scriba	1	12
2014-06-08	1	Mallorca	Quixal	Olga	7	A	1	S.tinca	1	14
2014-06-08	1	Mallorca	Quixal	Olga	7	A	1	S.tinca	1	12
2014-06-08	1	Mallorca	Quixal	Olga	7	A	1	S.tinca	1	10
2014-06-08	1	Mallorca	Quixal	Olga	7	A	1	S.tinca	1	10
2014-06-08	1	Mallorca	Quixal	Olga	7	A	1	S.tinca	1	10
2014-06-08	1	Mallorca	Quixal	Olga	7	A	2	A.imberbis	1	8
2014-06-08	1	Mallorca	Quixal	Olga	7	A	2	C.julis	1	12
2014-06-08	1	Mallorca	Quixal	Olga	7	A	2	C.julis	1	10
2014-06-08	1	Mallorca	Quixal	Olga	7	A	2	C.julis	1	10
2014-06-08	1	Mallorca	Quixal	Olga	7	A	2	C.julis	1	8
2014-06-08	1	Mallorca	Quixal	Olga	7	A	2	C.julis	1	8
2014-06-08	1	Mallorca	Quixal	Olga	7	A	2	C.julis	1	8
2014-06-08	1	Mallorca	Quixal	Olga	7	A	2	C.julis	1	6
2014-06-08	1	Mallorca	Quixal	Olga	7	A	2	C.julis	1	6
2014-06-08	1	Mallorca	Quixal	Olga	7	A	2	C.julis	1	6
2014-06-08	1	Mallorca	Quixal	Olga	7	A	2	C.julis	1	6
2014-06-08	1	Mallorca	Quixal	Olga	7	A	2	D.sargus	1	14
2014-06-08	1	Mallorca	Quixal	Olga	7	A	2	D.vulgaris	1	14
2014-06-08	1	Mallorca	Quixal	Olga	7	A	2	D.vulgaris	1	12
2014-06-08	1	Mallorca	Quixal	Olga	7	A	2	D.vulgaris	1	12
2014-06-08	1	Mallorca	Quixal	Olga	7	A	2	S.ocellatus	1	6
2014-06-08	1	Mallorca	Quixal	Olga	7	A	2	S.ocellatus	1	6
2014-06-08	1	Mallorca	Quixal	Olga	7	A	2	S.ocellatus	1	6
2014-06-08	1	Mallorca	Quixal	Olga	7	A	2	S.ocellatus	1	6
2014-06-08	1	Mallorca	Quixal	Olga	7	A	2	S.roisali	1	6
2014-06-08	1	Mallorca	Quixal	Olga	7	A	2	S.scriba	1	14
2014-06-08	1	Mallorca	Quixal	Olga	7	A	2	S.scriba	1	14
2014-06-08	1	Mallorca	Quixal	Olga	7	A	2	S.scriba	1	12
2014-06-08	1	Mallorca	Quixal	Olga	7	A	2	S.scriba	1	10
2014-06-08	1	Mallorca	Quixal	Olga	7	A	2	S.tinca	1	14
2014-06-08	1	Mallorca	Quixal	Olga	7	A	2	S.tinca	1	12
2014-06-08	1	Mallorca	Quixal	Olga	7	A	2	T.pavo	1	4
2014-06-08	1	Mallorca	Quixal	Olga	7	A	3	C.julis	1	12
2014-06-08	1	Mallorca	Quixal	Olga	7	A	3	C.julis	1	10
2014-06-08	1	Mallorca	Quixal	Olga	7	A	3	C.julis	1	10
2014-06-08	1	Mallorca	Quixal	Olga	7	A	3	C.julis	1	10
2014-06-08	1	Mallorca	Quixal	Olga	7	A	3	C.julis	1	8
2014-06-08	1	Mallorca	Quixal	Olga	7	A	3	C.julis	1	8
2014-06-08	1	Mallorca	Quixal	Olga	7	A	3	C.julis	1	6
2014-06-08	1	Mallorca	Quixal	Olga	7	A	3	C.julis	1	6
2014-06-08	1	Mallorca	Quixal	Olga	7	A	3	C.julis	1	6
2014-06-08	1	Mallorca	Quixal	Olga	7	A	3	C.julis	1	6
2014-06-08	1	Mallorca	Quixal	Olga	7	A	3	C.julis	1	6
2014-06-08	1	Mallorca	Quixal	Olga	7	A	3	C.julis	1	6
2014-06-08	1	Mallorca	Quixal	Olga	7	A	3	D.annularis	1	8
2014-06-08	1	Mallorca	Quixal	Olga	7	A	3	D.sargus	1	12
2014-06-08	1	Mallorca	Quixal	Olga	7	A	3	D.vulgaris	1	12
2014-06-08	1	Mallorca	Quixal	Olga	7	A	3	D.vulgaris	1	12
2014-06-08	1	Mallorca	Quixal	Olga	7	A	3	S.ocellatus	1	6
2014-06-08	1	Mallorca	Quixal	Olga	7	A	3	S.rostratus	1	8
2014-06-08	1	Mallorca	Quixal	Olga	7	A	3	S.tinca	1	18
2014-06-08	1	Mallorca	Quixal	Olga	7	A	3	S.tinca	1	14
2014-06-08	1	Mallorca	Quixal	Olga	7	A	3	S.tinca	1	14
2014-06-08	1	Mallorca	Quixal	Olga	7	A	3	S.tinca	1	14
2014-06-08	1	Mallorca	Quixal	Olga	7	A	3	S.tinca	1	14
2014-06-08	1	Mallorca	Quixal	Olga	7	A	3	S.tinca	1	14
2014-06-08	1	Mallorca	Quixal	Olga	7	A	3	S.tinca	1	12
2014-06-08	1	Mallorca	Quixal	Joan	7	B	4	C.julis	1	12
2014-06-08	1	Mallorca	Quixal	Joan	7	B	4	C.julis	1	10
2014-06-08	1	Mallorca	Quixal	Joan	7	B	4	C.julis	1	10
2014-06-08	1	Mallorca	Quixal	Joan	7	B	4	C.julis	1	8
2014-06-08	1	Mallorca	Quixal	Joan	7	B	4	D.annularis	1	10
2014-06-08	1	Mallorca	Quixal	Joan	7	B	4	D.sargus	1	18
2014-06-08	1	Mallorca	Quixal	Joan	7	B	4	D.sargus	1	18
2014-06-08	1	Mallorca	Quixal	Joan	7	B	4	D.vulgaris	1	22
2014-06-08	1	Mallorca	Quixal	Joan	7	B	4	D.vulgaris	1	14
2014-06-08	1	Mallorca	Quixal	Joan	7	B	4	D.vulgaris	1	14
2014-06-08	1	Mallorca	Quixal	Joan	7	B	4	D.vulgaris	1	14
2014-06-08	1	Mallorca	Quixal	Joan	7	B	4	D.vulgaris	1	14
2014-06-08	1	Mallorca	Quixal	Joan	7	B	4	D.vulgaris	1	14
2014-06-08	1	Mallorca	Quixal	Joan	7	B	4	D.vulgaris	1	14
2014-06-08	1	Mallorca	Quixal	Joan	7	B	4	D.vulgaris	1	14
2014-06-08	1	Mallorca	Quixal	Joan	7	B	4	D.vulgaris	1	14
2014-06-08	1	Mallorca	Quixal	Joan	7	B	4	D.vulgaris	1	14
2014-06-08	1	Mallorca	Quixal	Joan	7	B	4	D.vulgaris	1	14
2014-06-08	1	Mallorca	Quixal	Joan	7	B	4	D.vulgaris	1	12
2014-06-08	1	Mallorca	Quixal	Joan	7	B	4	D.vulgaris	1	12
2014-06-08	1	Mallorca	Quixal	Joan	7	B	4	S.ocellatus	1	10
2014-06-08	1	Mallorca	Quixal	Joan	7	B	4	S.ocellatus	1	8
2014-06-08	1	Mallorca	Quixal	Joan	7	B	4	S.ocellatus	1	8
2014-06-08	1	Mallorca	Quixal	Joan	7	B	4	S.roisali	1	10
2014-06-08	1	Mallorca	Quixal	Joan	7	B	4	S.rostratus	1	10
2014-06-08	1	Mallorca	Quixal	Joan	7	B	4	S.scriba	1	12
2014-06-08	1	Mallorca	Quixal	Joan	7	B	4	S.scriba	1	10
2014-06-08	1	Mallorca	Quixal	Joan	7	B	4	S.tinca	1	12
2014-06-08	1	Mallorca	Quixal	Joan	7	B	4	S.tinca	1	10
2014-06-08	1	Mallorca	Quixal	Joan	7	B	5	C.julis	1	12
2014-06-08	1	Mallorca	Quixal	Joan	7	B	5	C.julis	1	12
2014-06-08	1	Mallorca	Quixal	Joan	7	B	5	C.julis	1	10
2014-06-08	1	Mallorca	Quixal	Joan	7	B	5	C.julis	1	10
2014-06-08	1	Mallorca	Quixal	Joan	7	B	5	C.julis	1	10
2014-06-08	1	Mallorca	Quixal	Joan	7	B	5	C.julis	1	10
2014-06-08	1	Mallorca	Quixal	Joan	7	B	5	C.julis	1	10
2014-06-08	1	Mallorca	Quixal	Joan	7	B	5	D.annularis	1	12
2014-06-08	1	Mallorca	Quixal	Joan	7	B	5	D.annularis	1	12
2014-06-08	1	Mallorca	Quixal	Joan	7	B	5	D.sargus	1	14
2014-06-08	1	Mallorca	Quixal	Joan	7	B	5	D.sargus	1	14
2014-06-08	1	Mallorca	Quixal	Joan	7	B	5	D.sargus	1	12
2014-06-08	1	Mallorca	Quixal	Joan	7	B	5	D.sargus	1	12
2014-06-08	1	Mallorca	Quixal	Joan	7	B	5	D.vulgaris	1	12
2014-06-08	1	Mallorca	Quixal	Joan	7	B	5	D.vulgaris	1	10
2014-06-08	1	Mallorca	Quixal	Joan	7	B	5	S.ocellatus	1	12
2014-06-08	1	Mallorca	Quixal	Joan	7	B	5	S.ocellatus	1	12
2014-06-08	1	Mallorca	Quixal	Joan	7	B	5	S.ocellatus	1	8
2014-06-08	1	Mallorca	Quixal	Joan	7	B	5	S.roisali	1	12
2014-06-08	1	Mallorca	Quixal	Joan	7	B	5	S.scriba	1	10
2014-06-08	1	Mallorca	Quixal	Joan	7	B	5	S.tinca	1	16
2014-06-08	1	Mallorca	Quixal	Joan	7	B	5	S.tinca	1	14
2014-06-08	1	Mallorca	Quixal	Joan	7	B	5	S.tinca	1	10
2014-06-08	1	Mallorca	Quixal	Joan	7	B	5	S.tinca	1	10
2014-06-08	1	Mallorca	Quixal	Joan	7	B	5	S.tinca	1	10
2014-06-08	1	Mallorca	Quixal	Joan	7	B	5	T.pavo	1	10
2014-06-08	1	Mallorca	Quixal	Joan	7	B	5	T.pavo	1	10
2014-06-08	1	Mallorca	Quixal	Joan	7	B	5	T.pavo	1	10
2014-06-08	1	Mallorca	Quixal	Joan	7	B	5	T.pavo	1	10
2014-06-08	1	Mallorca	Quixal	Joan	7	B	6	C.julis	1	10
2014-06-08	1	Mallorca	Quixal	Joan	7	B	6	C.julis	1	10
2014-06-08	1	Mallorca	Quixal	Joan	7	B	6	C.julis	1	10
2014-06-08	1	Mallorca	Quixal	Joan	7	B	6	C.julis	1	8
2014-06-08	1	Mallorca	Quixal	Joan	7	B	6	C.julis	1	8
2014-06-08	1	Mallorca	Quixal	Joan	7	B	6	C.julis	1	8
2014-06-08	1	Mallorca	Quixal	Joan	7	B	6	C.julis	1	8
2014-06-08	1	Mallorca	Quixal	Joan	7	B	6	C.julis	1	6
2014-06-08	1	Mallorca	Quixal	Joan	7	B	6	D.annularis	1	12
2014-06-08	1	Mallorca	Quixal	Joan	7	B	6	D.annularis	1	12
2014-06-08	1	Mallorca	Quixal	Joan	7	B	6	D.annularis	1	12
2014-06-08	1	Mallorca	Quixal	Joan	7	B	6	D.annularis	1	12
2014-06-08	1	Mallorca	Quixal	Joan	7	B	6	D.annularis	1	12
2014-06-08	1	Mallorca	Quixal	Joan	7	B	6	D.sargus	1	16
2014-06-08	1	Mallorca	Quixal	Joan	7	B	6	D.vulgaris	1	10
2014-06-08	1	Mallorca	Quixal	Joan	7	B	6	D.vulgaris	1	4
2014-06-08	1	Mallorca	Quixal	Joan	7	B	6	S.cabrilla	1	12
2014-06-08	1	Mallorca	Quixal	Joan	7	B	6	S.scriba	1	12
2014-06-08	1	Mallorca	Quixal	Joan	7	B	6	S.ocellatus	1	10
2014-06-08	1	Mallorca	Quixal	Joan	7	B	6	S.ocellatus	1	10
2014-06-08	1	Mallorca	Quixal	Joan	7	B	6	S.ocellatus	1	10
2014-06-08	1	Mallorca	Quixal	Joan	7	B	6	S.ocellatus	1	8
2014-06-08	1	Mallorca	Quixal	Joan	7	B	6	S.ocellatus	1	8
2014-06-08	1	Mallorca	Quixal	Joan	7	B	6	S.tinca	1	16
2014-06-08	1	Mallorca	Quixal	Joan	7	B	6	S.tinca	1	14
2014-06-08	1	Mallorca	Quixal	Joan	7	B	6	S.tinca	1	12
2014-06-08	1	Mallorca	Quixal	Joan	7	B	6	S.tinca	1	10
2014-06-08	1	Mallorca	Quixal	Joan	7	B	6	S.tinca	1	10
2014-06-08	1	Mallorca	Quixal	Joan	7	B	6	S.tinca	1	10
2014-06-08	1	Mallorca	Quixal	Joan	7	B	6	S.tinca	1	8
2014-06-08	1	Mallorca	Quixal	Joan	7	B	6	S.tinca	1	8
2014-06-08	1	Mallorca	Quixal	Joan	7	B	6	T.pavo	1	10
2014-06-08	1	Mallorca	Quixal	Joan	7	B	6	T.pavo	1	10
2014-06-08	1	Mallorca	Quixal	Joan	7	B	6	T.pavo	1	10
2014-06-08	1	Mallorca	Quixal	Joan	7	B	6	T.pavo	1	8
2014-06-08	1	Mallorca	Quixal	Joan	7	B	6	T.pavo	1	8
2014-06-09	1	Mallorca	Daflubrix	Olga	8	A	1	C.julis	1	10
2014-06-09	1	Mallorca	Daflubrix	Olga	8	A	1	C.julis	1	10
2014-06-09	1	Mallorca	Daflubrix	Olga	8	A	1	C.julis	1	8
2014-06-09	1	Mallorca	Daflubrix	Olga	8	A	1	C.julis	1	8
2014-06-09	1	Mallorca	Daflubrix	Olga	8	A	1	C.julis	1	8
2014-06-09	1	Mallorca	Daflubrix	Olga	8	A	1	C.julis	1	8
2014-06-09	1	Mallorca	Daflubrix	Olga	8	A	1	D.sargus	1	20
2014-06-09	1	Mallorca	Daflubrix	Olga	8	A	1	D.sargus	1	14
2014-06-09	1	Mallorca	Daflubrix	Olga	8	A	1	D.sargus	1	12
2014-06-09	1	Mallorca	Daflubrix	Olga	8	A	1	D.vulgaris	1	16
2014-06-09	1	Mallorca	Daflubrix	Olga	8	A	1	D.vulgaris	1	16
2014-06-09	1	Mallorca	Daflubrix	Olga	8	A	1	D.vulgaris	1	16
2014-06-09	1	Mallorca	Daflubrix	Olga	8	A	1	D.vulgaris	1	16
2014-06-09	1	Mallorca	Daflubrix	Olga	8	A	1	D.vulgaris	1	10
2014-06-09	1	Mallorca	Daflubrix	Olga	8	A	1	E.marginatus	1	34
2014-06-09	1	Mallorca	Daflubrix	Olga	8	A	1	O.melanura	1	10
2014-06-09	1	Mallorca	Daflubrix	Olga	8	A	1	O.melanura	1	10
2014-06-09	1	Mallorca	Daflubrix	Olga	8	A	1	O.melanura	1	10
2014-06-09	1	Mallorca	Daflubrix	Olga	8	A	1	S.mediterraneus	1	10
2014-06-09	1	Mallorca	Daflubrix	Olga	8	A	1	S.ocellatus	1	6
2014-06-09	1	Mallorca	Daflubrix	Olga	8	A	1	S.ocellatus	1	4
2014-06-09	1	Mallorca	Daflubrix	Olga	8	A	1	S.salpa	1	14
2014-06-09	1	Mallorca	Daflubrix	Olga	8	A	1	S.salpa	1	14
2014-06-09	1	Mallorca	Daflubrix	Olga	8	A	1	S.salpa	1	14
2014-06-09	1	Mallorca	Daflubrix	Olga	8	A	1	S.salpa	1	14
2014-06-09	1	Mallorca	Daflubrix	Olga	8	A	1	S.salpa	1	14
2014-06-09	1	Mallorca	Daflubrix	Olga	8	A	1	S.salpa	1	14
2014-06-09	1	Mallorca	Daflubrix	Olga	8	A	1	S.salpa	1	14
2014-06-09	1	Mallorca	Daflubrix	Olga	8	A	1	S.salpa	1	14
2014-06-09	1	Mallorca	Daflubrix	Olga	8	A	1	S.salpa	1	14
2014-06-09	1	Mallorca	Daflubrix	Olga	8	A	1	S.salpa	1	14
2014-06-09	1	Mallorca	Daflubrix	Olga	8	A	1	S.salpa	1	14
2014-06-09	1	Mallorca	Daflubrix	Olga	8	A	1	S.salpa	1	14
2014-06-09	1	Mallorca	Daflubrix	Olga	8	A	1	S.salpa	1	14
2014-06-09	1	Mallorca	Daflubrix	Olga	8	A	1	S.salpa	1	14
2014-06-09	1	Mallorca	Daflubrix	Olga	8	A	1	S.salpa	1	14
2014-06-09	1	Mallorca	Daflubrix	Olga	8	A	1	S.salpa	1	14
2014-06-09	1	Mallorca	Daflubrix	Olga	8	A	1	S.salpa	1	14
2014-06-09	1	Mallorca	Daflubrix	Olga	8	A	1	S.salpa	1	14
2014-06-09	1	Mallorca	Daflubrix	Olga	8	A	1	S.salpa	1	14
2014-06-09	1	Mallorca	Daflubrix	Olga	8	A	1	S.salpa	1	14
2014-06-09	1	Mallorca	Daflubrix	Olga	8	A	1	S.salpa	1	14
2014-06-09	1	Mallorca	Daflubrix	Olga	8	A	1	S.salpa	1	14
2014-06-09	1	Mallorca	Daflubrix	Olga	8	A	1	S.salpa	1	14
2014-06-09	1	Mallorca	Daflubrix	Olga	8	A	1	S.salpa	1	14
2014-06-09	1	Mallorca	Daflubrix	Olga	8	A	1	S.salpa	1	14
2014-06-09	1	Mallorca	Daflubrix	Olga	8	A	1	S.salpa	1	14
2014-06-09	1	Mallorca	Daflubrix	Olga	8	A	1	S.salpa	1	14
2014-06-09	1	Mallorca	Daflubrix	Olga	8	A	1	S.salpa	1	14
2014-06-09	1	Mallorca	Daflubrix	Olga	8	A	1	S.salpa	1	14
2014-06-09	1	Mallorca	Daflubrix	Olga	8	A	1	S.salpa	1	14
2014-06-09	1	Mallorca	Daflubrix	Olga	8	A	1	S.scriba	1	16
2014-06-09	1	Mallorca	Daflubrix	Olga	8	A	1	S.scriba	1	14
2014-06-09	1	Mallorca	Daflubrix	Olga	8	A	1	S.scriba	1	12
2014-06-09	1	Mallorca	Daflubrix	Olga	8	A	1	S.scriba	1	12
2014-06-09	1	Mallorca	Daflubrix	Olga	8	A	1	S.tinca	1	18
2014-06-09	1	Mallorca	Daflubrix	Olga	8	A	1	S.tinca	1	18
2014-06-09	1	Mallorca	Daflubrix	Olga	8	A	1	S.tinca	1	16
2014-06-09	1	Mallorca	Daflubrix	Olga	8	A	1	S.tinca	1	12
2014-06-09	1	Mallorca	Daflubrix	Olga	8	A	2	C.julis	1	14
2014-06-09	1	Mallorca	Daflubrix	Olga	8	A	2	C.julis	1	12
2014-06-09	1	Mallorca	Daflubrix	Olga	8	A	2	C.julis	1	12
2014-06-09	1	Mallorca	Daflubrix	Olga	8	A	2	C.julis	1	10
2014-06-09	1	Mallorca	Daflubrix	Olga	8	A	2	C.julis	1	10
2014-06-09	1	Mallorca	Daflubrix	Olga	8	A	2	C.julis	1	6
2014-06-09	1	Mallorca	Daflubrix	Olga	8	A	2	C.julis	1	6
2014-06-09	1	Mallorca	Daflubrix	Olga	8	A	2	D.sargus	1	32
2014-06-09	1	Mallorca	Daflubrix	Olga	8	A	2	D.sargus	1	16
2014-06-09	1	Mallorca	Daflubrix	Olga	8	A	2	D.sargus	1	12
2014-06-09	1	Mallorca	Daflubrix	Olga	8	A	2	D.vulgaris	1	16
2014-06-09	1	Mallorca	Daflubrix	Olga	8	A	2	D.vulgaris	1	12
2014-06-09	1	Mallorca	Daflubrix	Olga	8	A	2	D.vulgaris	1	12
2014-06-09	1	Mallorca	Daflubrix	Olga	8	A	2	S.mediterraneus	1	10
2014-06-09	1	Mallorca	Daflubrix	Olga	8	A	2	S.ocellatus	1	8
2014-06-09	1	Mallorca	Daflubrix	Olga	8	A	2	S.ocellatus	1	6
2014-06-09	1	Mallorca	Daflubrix	Olga	8	A	2	S.ocellatus	1	6
2014-06-09	1	Mallorca	Daflubrix	Olga	8	A	2	S.roisali	1	12
2014-06-09	1	Mallorca	Daflubrix	Olga	8	A	2	S.roisali	1	8
2014-06-09	1	Mallorca	Daflubrix	Olga	8	A	2	S.roisali	1	8
2014-06-09	1	Mallorca	Daflubrix	Olga	8	A	2	S.roisali	1	8
2014-06-09	1	Mallorca	Daflubrix	Olga	8	A	2	S.roisali	1	6
2014-06-09	1	Mallorca	Daflubrix	Olga	8	A	2	S.salpa	1	14
2014-06-09	1	Mallorca	Daflubrix	Olga	8	A	2	S.salpa	1	14
2014-06-09	1	Mallorca	Daflubrix	Olga	8	A	2	S.salpa	1	14
2014-06-09	1	Mallorca	Daflubrix	Olga	8	A	2	S.salpa	1	14
2014-06-09	1	Mallorca	Daflubrix	Olga	8	A	2	S.salpa	1	14
2014-06-09	1	Mallorca	Daflubrix	Olga	8	A	2	S.salpa	1	14
2014-06-09	1	Mallorca	Daflubrix	Olga	8	A	2	S.salpa	1	14
2014-06-09	1	Mallorca	Daflubrix	Olga	8	A	2	S.salpa	1	14
2014-06-09	1	Mallorca	Daflubrix	Olga	8	A	2	S.salpa	1	14
2014-06-09	1	Mallorca	Daflubrix	Olga	8	A	2	S.salpa	1	14
2014-06-09	1	Mallorca	Daflubrix	Olga	8	A	2	S.salpa	1	14
2014-06-09	1	Mallorca	Daflubrix	Olga	8	A	2	S.salpa	1	14
2014-06-09	1	Mallorca	Daflubrix	Olga	8	A	2	S.salpa	1	14
2014-06-09	1	Mallorca	Daflubrix	Olga	8	A	2	S.salpa	1	14
2014-06-09	1	Mallorca	Daflubrix	Olga	8	A	2	S.salpa	1	14
2014-06-09	1	Mallorca	Daflubrix	Olga	8	A	2	S.salpa	1	14
2014-06-09	1	Mallorca	Daflubrix	Olga	8	A	2	S.salpa	1	14
2014-06-09	1	Mallorca	Daflubrix	Olga	8	A	2	S.salpa	1	14
2014-06-09	1	Mallorca	Daflubrix	Olga	8	A	2	S.salpa	1	14
2014-06-09	1	Mallorca	Daflubrix	Olga	8	A	2	S.salpa	1	14
2014-06-09	1	Mallorca	Daflubrix	Olga	8	A	2	S.salpa	1	14
2014-06-09	1	Mallorca	Daflubrix	Olga	8	A	2	S.salpa	1	14
2014-06-09	1	Mallorca	Daflubrix	Olga	8	A	2	S.salpa	1	14
2014-06-09	1	Mallorca	Daflubrix	Olga	8	A	2	S.salpa	1	14
2014-06-09	1	Mallorca	Daflubrix	Olga	8	A	2	S.salpa	1	14
2014-06-09	1	Mallorca	Daflubrix	Olga	8	A	2	S.salpa	1	14
2014-06-09	1	Mallorca	Daflubrix	Olga	8	A	2	S.salpa	1	14
2014-06-09	1	Mallorca	Daflubrix	Olga	8	A	2	S.salpa	1	14
2014-06-09	1	Mallorca	Daflubrix	Olga	8	A	2	S.salpa	1	14
2014-06-09	1	Mallorca	Daflubrix	Olga	8	A	2	S.salpa	1	14
2014-06-09	1	Mallorca	Daflubrix	Olga	8	A	2	S.salpa	1	14
2014-06-09	1	Mallorca	Daflubrix	Olga	8	A	2	S.salpa	1	14
2014-06-09	1	Mallorca	Daflubrix	Olga	8	A	2	S.salpa	1	14
2014-06-09	1	Mallorca	Daflubrix	Olga	8	A	2	S.salpa	1	14
2014-06-09	1	Mallorca	Daflubrix	Olga	8	A	2	S.salpa	1	14
2014-06-09	1	Mallorca	Daflubrix	Olga	8	A	2	S.salpa	1	14
2014-06-09	1	Mallorca	Daflubrix	Olga	8	A	2	S.salpa	1	14
2014-06-09	1	Mallorca	Daflubrix	Olga	8	A	2	S.salpa	1	14
2014-06-09	1	Mallorca	Daflubrix	Olga	8	A	2	S.salpa	1	14
2014-06-09	1	Mallorca	Daflubrix	Olga	8	A	2	S.salpa	1	14
2014-06-09	1	Mallorca	Daflubrix	Olga	8	A	2	S.salpa	1	14
2014-06-09	1	Mallorca	Daflubrix	Olga	8	A	2	S.salpa	1	14
2014-06-09	1	Mallorca	Daflubrix	Olga	8	A	2	S.salpa	1	14
2014-06-09	1	Mallorca	Daflubrix	Olga	8	A	2	S.salpa	1	14
2014-06-09	1	Mallorca	Daflubrix	Olga	8	A	2	S.salpa	1	14
2014-06-09	1	Mallorca	Daflubrix	Olga	8	A	2	S.salpa	1	14
2014-06-09	1	Mallorca	Daflubrix	Olga	8	A	2	S.salpa	1	14
2014-06-09	1	Mallorca	Daflubrix	Olga	8	A	2	S.salpa	1	14
2014-06-09	1	Mallorca	Daflubrix	Olga	8	A	2	S.salpa	1	14
2014-06-09	1	Mallorca	Daflubrix	Olga	8	A	2	S.salpa	1	14
2014-06-09	1	Mallorca	Daflubrix	Olga	8	A	2	S.salpa	1	14
2014-06-09	1	Mallorca	Daflubrix	Olga	8	A	2	S.salpa	1	14
2014-06-09	1	Mallorca	Daflubrix	Olga	8	A	2	S.salpa	1	14
2014-06-09	1	Mallorca	Daflubrix	Olga	8	A	2	S.salpa	1	14
2014-06-09	1	Mallorca	Daflubrix	Olga	8	A	2	S.salpa	1	14
2014-06-09	1	Mallorca	Daflubrix	Olga	8	A	2	S.salpa	1	14
2014-06-09	1	Mallorca	Daflubrix	Olga	8	A	2	S.salpa	1	14
2014-06-09	1	Mallorca	Daflubrix	Olga	8	A	2	S.salpa	1	14
2014-06-09	1	Mallorca	Daflubrix	Olga	8	A	2	S.salpa	1	14
2014-06-09	1	Mallorca	Daflubrix	Olga	8	A	2	S.salpa	1	14
2014-06-09	1	Mallorca	Daflubrix	Olga	8	A	2	S.salpa	1	14
2014-06-09	1	Mallorca	Daflubrix	Olga	8	A	2	S.salpa	1	14
2014-06-09	1	Mallorca	Daflubrix	Olga	8	A	2	S.salpa	1	14
2014-06-09	1	Mallorca	Daflubrix	Olga	8	A	2	S.salpa	1	14
2014-06-09	1	Mallorca	Daflubrix	Olga	8	A	2	S.salpa	1	14
2014-06-09	1	Mallorca	Daflubrix	Olga	8	A	2	S.salpa	1	14
2014-06-09	1	Mallorca	Daflubrix	Olga	8	A	2	S.salpa	1	14
2014-06-09	1	Mallorca	Daflubrix	Olga	8	A	2	S.salpa	1	14
2014-06-09	1	Mallorca	Daflubrix	Olga	8	A	2	S.salpa	1	14
2014-06-09	1	Mallorca	Daflubrix	Olga	8	A	2	S.salpa	1	14
2014-06-09	1	Mallorca	Daflubrix	Olga	8	A	2	S.salpa	1	14
2014-06-09	1	Mallorca	Daflubrix	Olga	8	A	2	S.salpa	1	14
2014-06-09	1	Mallorca	Daflubrix	Olga	8	A	2	S.salpa	1	14
2014-06-09	1	Mallorca	Daflubrix	Olga	8	A	2	S.salpa	1	14
2014-06-09	1	Mallorca	Daflubrix	Olga	8	A	2	S.salpa	1	14
2014-06-09	1	Mallorca	Daflubrix	Olga	8	A	2	S.salpa	1	16
2014-06-09	1	Mallorca	Daflubrix	Olga	8	A	2	S.salpa	1	16
2014-06-09	1	Mallorca	Daflubrix	Olga	8	A	2	S.salpa	1	16
2014-06-09	1	Mallorca	Daflubrix	Olga	8	A	2	S.salpa	1	16
2014-06-09	1	Mallorca	Daflubrix	Olga	8	A	2	S.salpa	1	16
2014-06-09	1	Mallorca	Daflubrix	Olga	8	A	2	S.salpa	1	16
2014-06-09	1	Mallorca	Daflubrix	Olga	8	A	2	S.salpa	1	16
2014-06-09	1	Mallorca	Daflubrix	Olga	8	A	2	S.salpa	1	16
2014-06-09	1	Mallorca	Daflubrix	Olga	8	A	2	S.salpa	1	16
2014-06-09	1	Mallorca	Daflubrix	Olga	8	A	2	S.salpa	1	16
2014-06-09	1	Mallorca	Daflubrix	Olga	8	A	2	S.salpa	1	16
2014-06-09	1	Mallorca	Daflubrix	Olga	8	A	2	S.salpa	1	16
2014-06-09	1	Mallorca	Daflubrix	Olga	8	A	2	S.salpa	1	16
2014-06-09	1	Mallorca	Daflubrix	Olga	8	A	2	S.salpa	1	16
2014-06-09	1	Mallorca	Daflubrix	Olga	8	A	2	S.salpa	1	16
2014-06-09	1	Mallorca	Daflubrix	Olga	8	A	2	S.salpa	1	16
2014-06-09	1	Mallorca	Daflubrix	Olga	8	A	2	S.salpa	1	16
2014-06-09	1	Mallorca	Daflubrix	Olga	8	A	2	S.salpa	1	16
2014-06-09	1	Mallorca	Daflubrix	Olga	8	A	2	S.salpa	1	16
2014-06-09	1	Mallorca	Daflubrix	Olga	8	A	2	S.salpa	1	16
2014-06-09	1	Mallorca	Daflubrix	Olga	8	A	2	S.salpa	1	16
2014-06-09	1	Mallorca	Daflubrix	Olga	8	A	2	S.salpa	1	16
2014-06-09	1	Mallorca	Daflubrix	Olga	8	A	2	S.salpa	1	16
2014-06-09	1	Mallorca	Daflubrix	Olga	8	A	2	S.salpa	1	16
2014-06-09	1	Mallorca	Daflubrix	Olga	8	A	2	S.salpa	1	16
2014-06-09	1	Mallorca	Daflubrix	Olga	8	A	2	S.salpa	1	16
2014-06-09	1	Mallorca	Daflubrix	Olga	8	A	2	S.salpa	1	16
2014-06-09	1	Mallorca	Daflubrix	Olga	8	A	2	S.salpa	1	16
2014-06-09	1	Mallorca	Daflubrix	Olga	8	A	2	S.salpa	1	16
2014-06-09	1	Mallorca	Daflubrix	Olga	8	A	2	S.salpa	1	16
2014-06-09	1	Mallorca	Daflubrix	Olga	8	A	2	S.salpa	1	16
2014-06-09	1	Mallorca	Daflubrix	Olga	8	A	2	S.salpa	1	16
2014-06-09	1	Mallorca	Daflubrix	Olga	8	A	2	S.salpa	1	16
2014-06-09	1	Mallorca	Daflubrix	Olga	8	A	2	S.salpa	1	16
2014-06-09	1	Mallorca	Daflubrix	Olga	8	A	2	S.salpa	1	16
2014-06-09	1	Mallorca	Daflubrix	Olga	8	A	2	S.salpa	1	16
2014-06-09	1	Mallorca	Daflubrix	Olga	8	A	2	S.salpa	1	16
2014-06-09	1	Mallorca	Daflubrix	Olga	8	A	2	S.salpa	1	16
2014-06-09	1	Mallorca	Daflubrix	Olga	8	A	2	S.salpa	1	16
2014-06-09	1	Mallorca	Daflubrix	Olga	8	A	2	S.salpa	1	16
2014-06-09	1	Mallorca	Daflubrix	Olga	8	A	2	S.salpa	1	16
2014-06-09	1	Mallorca	Daflubrix	Olga	8	A	2	S.salpa	1	16
2014-06-09	1	Mallorca	Daflubrix	Olga	8	A	2	S.salpa	1	16
2014-06-09	1	Mallorca	Daflubrix	Olga	8	A	2	S.salpa	1	16
2014-06-09	1	Mallorca	Daflubrix	Olga	8	A	2	S.salpa	1	16
2014-06-09	1	Mallorca	Daflubrix	Olga	8	A	2	S.salpa	1	16
2014-06-09	1	Mallorca	Daflubrix	Olga	8	A	2	S.salpa	1	16
2014-06-09	1	Mallorca	Daflubrix	Olga	8	A	2	S.salpa	1	16
2014-06-09	1	Mallorca	Daflubrix	Olga	8	A	2	S.salpa	1	16
2014-06-09	1	Mallorca	Daflubrix	Olga	8	A	2	S.salpa	1	16
2014-06-09	1	Mallorca	Daflubrix	Olga	8	A	2	S.salpa	1	16
2014-06-09	1	Mallorca	Daflubrix	Olga	8	A	2	S.salpa	1	16
2014-06-09	1	Mallorca	Daflubrix	Olga	8	A	2	S.salpa	1	16
2014-06-09	1	Mallorca	Daflubrix	Olga	8	A	2	S.salpa	1	16
2014-06-09	1	Mallorca	Daflubrix	Olga	8	A	2	S.salpa	1	16
2014-06-09	1	Mallorca	Daflubrix	Olga	8	A	2	S.salpa	1	16
2014-06-09	1	Mallorca	Daflubrix	Olga	8	A	2	S.salpa	1	16
2014-06-09	1	Mallorca	Daflubrix	Olga	8	A	2	S.salpa	1	16
2014-06-09	1	Mallorca	Daflubrix	Olga	8	A	2	S.salpa	1	16
2014-06-09	1	Mallorca	Daflubrix	Olga	8	A	2	S.salpa	1	16
2014-06-09	1	Mallorca	Daflubrix	Olga	8	A	2	S.salpa	1	16
2014-06-09	1	Mallorca	Daflubrix	Olga	8	A	2	S.salpa	1	16
2014-06-09	1	Mallorca	Daflubrix	Olga	8	A	2	S.salpa	1	16
2014-06-09	1	Mallorca	Daflubrix	Olga	8	A	2	S.salpa	1	16
2014-06-09	1	Mallorca	Daflubrix	Olga	8	A	2	S.salpa	1	16
2014-06-09	1	Mallorca	Daflubrix	Olga	8	A	2	S.salpa	1	16
2014-06-09	1	Mallorca	Daflubrix	Olga	8	A	2	S.salpa	1	16
2014-06-09	1	Mallorca	Daflubrix	Olga	8	A	2	S.salpa	1	16
2014-06-09	1	Mallorca	Daflubrix	Olga	8	A	2	S.salpa	1	16
2014-06-09	1	Mallorca	Daflubrix	Olga	8	A	2	S.salpa	1	16
2014-06-09	1	Mallorca	Daflubrix	Olga	8	A	2	S.salpa	1	16
2014-06-09	1	Mallorca	Daflubrix	Olga	8	A	2	S.salpa	1	16
2014-06-09	1	Mallorca	Daflubrix	Olga	8	A	2	S.salpa	1	16
2014-06-09	1	Mallorca	Daflubrix	Olga	8	A	2	S.salpa	1	16
2014-06-09	1	Mallorca	Daflubrix	Olga	8	A	2	S.salpa	1	16
2014-06-09	1	Mallorca	Daflubrix	Olga	8	A	2	S.scriba	1	18
2014-06-09	1	Mallorca	Daflubrix	Olga	8	A	2	S.scriba	1	16
2014-06-09	1	Mallorca	Daflubrix	Olga	8	A	2	S.tinca	1	24
2014-06-09	1	Mallorca	Daflubrix	Olga	8	A	2	S.tinca	1	20
2014-06-09	1	Mallorca	Daflubrix	Olga	8	A	2	S.tinca	1	14
2014-06-09	1	Mallorca	Daflubrix	Olga	8	A	2	S.tinca	1	14
2014-06-09	1	Mallorca	Daflubrix	Olga	8	A	2	S.tinca	1	12
2014-06-09	1	Mallorca	Daflubrix	Olga	8	A	2	S.tinca	1	10
2014-06-09	1	Mallorca	Daflubrix	Olga	8	A	2	T.pavo	1	12
2014-06-09	1	Mallorca	Daflubrix	Olga	8	A	2	T.pavo	1	12
2014-06-09	1	Mallorca	Daflubrix	Olga	8	A	2	T.pavo	1	10
2014-06-09	1	Mallorca	Daflubrix	Olga	8	A	3	A.imberbis	1	6
2014-06-09	1	Mallorca	Daflubrix	Olga	8	A	3	C.julis	1	14
2014-06-09	1	Mallorca	Daflubrix	Olga	8	A	3	C.julis	1	10
2014-06-09	1	Mallorca	Daflubrix	Olga	8	A	3	C.julis	1	10
2014-06-09	1	Mallorca	Daflubrix	Olga	8	A	3	C.julis	1	10
2014-06-09	1	Mallorca	Daflubrix	Olga	8	A	3	C.julis	1	8
2014-06-09	1	Mallorca	Daflubrix	Olga	8	A	3	C.julis	1	6
2014-06-09	1	Mallorca	Daflubrix	Olga	8	A	3	C.julis	1	6
2014-06-09	1	Mallorca	Daflubrix	Olga	8	A	3	C.julis	1	6
2014-06-09	1	Mallorca	Daflubrix	Olga	8	A	3	C.julis	1	6
2014-06-09	1	Mallorca	Daflubrix	Olga	8	A	3	C.julis	1	6
2014-06-09	1	Mallorca	Daflubrix	Olga	8	A	3	C.julis	1	6
2014-06-09	1	Mallorca	Daflubrix	Olga	8	A	3	D.puntazzo	1	22
2014-06-09	1	Mallorca	Daflubrix	Olga	8	A	3	D.sargus	1	30
2014-06-09	1	Mallorca	Daflubrix	Olga	8	A	3	D.sargus	1	28
2014-06-09	1	Mallorca	Daflubrix	Olga	8	A	3	D.vulgaris	1	18
2014-06-09	1	Mallorca	Daflubrix	Olga	8	A	3	D.vulgaris	1	16
2014-06-09	1	Mallorca	Daflubrix	Olga	8	A	3	D.vulgaris	1	16
2014-06-09	1	Mallorca	Daflubrix	Olga	8	A	3	D.vulgaris	1	14
2014-06-09	1	Mallorca	Daflubrix	Olga	8	A	3	D.vulgaris	1	12
2014-06-09	1	Mallorca	Daflubrix	Olga	8	A	3	D.vulgaris	1	12
2014-06-09	1	Mallorca	Daflubrix	Olga	8	A	3	D.vulgaris	1	12
2014-06-09	1	Mallorca	Daflubrix	Olga	8	A	3	D.vulgaris	1	12
2014-06-09	1	Mallorca	Daflubrix	Olga	8	A	3	D.vulgaris	1	14
2014-06-09	1	Mallorca	Daflubrix	Olga	8	A	3	L.merula	1	34
2014-06-09	1	Mallorca	Daflubrix	Olga	8	A	3	S.ocellatus	1	10
2014-06-09	1	Mallorca	Daflubrix	Olga	8	A	3	S.ocellatus	1	10
2014-06-09	1	Mallorca	Daflubrix	Olga	8	A	3	S.ocellatus	1	8
2014-06-09	1	Mallorca	Daflubrix	Olga	8	A	3	S.ocellatus	1	6
2014-06-09	1	Mallorca	Daflubrix	Olga	8	A	3	S.roisali	1	10
2014-06-09	1	Mallorca	Daflubrix	Olga	8	A	3	S.salpa	1	14
2014-06-09	1	Mallorca	Daflubrix	Olga	8	A	3	S.salpa	1	14
2014-06-09	1	Mallorca	Daflubrix	Olga	8	A	3	S.salpa	1	14
2014-06-09	1	Mallorca	Daflubrix	Olga	8	A	3	S.salpa	1	14
2014-06-09	1	Mallorca	Daflubrix	Olga	8	A	3	S.salpa	1	14
2014-06-09	1	Mallorca	Daflubrix	Olga	8	A	3	S.salpa	1	14
2014-06-09	1	Mallorca	Daflubrix	Olga	8	A	3	S.salpa	1	14
2014-06-09	1	Mallorca	Daflubrix	Olga	8	A	3	S.salpa	1	14
2014-06-09	1	Mallorca	Daflubrix	Olga	8	A	3	S.salpa	1	14
2014-06-09	1	Mallorca	Daflubrix	Olga	8	A	3	S.salpa	1	14
2014-06-09	1	Mallorca	Daflubrix	Olga	8	A	3	S.salpa	1	14
2014-06-09	1	Mallorca	Daflubrix	Olga	8	A	3	S.salpa	1	14
2014-06-09	1	Mallorca	Daflubrix	Olga	8	A	3	S.salpa	1	14
2014-06-09	1	Mallorca	Daflubrix	Olga	8	A	3	S.salpa	1	14
2014-06-09	1	Mallorca	Daflubrix	Olga	8	A	3	S.salpa	1	14
2014-06-09	1	Mallorca	Daflubrix	Olga	8	A	3	S.salpa	1	14
2014-06-09	1	Mallorca	Daflubrix	Olga	8	A	3	S.salpa	1	14
2014-06-09	1	Mallorca	Daflubrix	Olga	8	A	3	S.salpa	1	14
2014-06-09	1	Mallorca	Daflubrix	Olga	8	A	3	S.salpa	1	14
2014-06-09	1	Mallorca	Daflubrix	Olga	8	A	3	S.salpa	1	14
2014-06-09	1	Mallorca	Daflubrix	Olga	8	A	3	S.salpa	1	14
2014-06-09	1	Mallorca	Daflubrix	Olga	8	A	3	S.salpa	1	14
2014-06-09	1	Mallorca	Daflubrix	Olga	8	A	3	S.salpa	1	14
2014-06-09	1	Mallorca	Daflubrix	Olga	8	A	3	S.salpa	1	14
2014-06-09	1	Mallorca	Daflubrix	Olga	8	A	3	S.salpa	1	14
2014-06-09	1	Mallorca	Daflubrix	Olga	8	A	3	S.salpa	1	14
2014-06-09	1	Mallorca	Daflubrix	Olga	8	A	3	S.salpa	1	14
2014-06-09	1	Mallorca	Daflubrix	Olga	8	A	3	S.salpa	1	14
2014-06-09	1	Mallorca	Daflubrix	Olga	8	A	3	S.salpa	1	14
2014-06-09	1	Mallorca	Daflubrix	Olga	8	A	3	S.salpa	1	14
2014-06-09	1	Mallorca	Daflubrix	Olga	8	A	3	S.scriba	1	14
2014-06-09	1	Mallorca	Daflubrix	Olga	8	A	3	S.tinca	1	12
2014-06-09	1	Mallorca	Daflubrix	Olga	8	A	3	S.tinca	1	12
2014-06-09	1	Mallorca	Daflubrix	Joan	8	B	4	C.julis	1	10
2014-06-09	1	Mallorca	Daflubrix	Joan	8	B	4	C.julis	1	8
2014-06-09	1	Mallorca	Daflubrix	Joan	8	B	4	C.julis	1	8
2014-06-09	1	Mallorca	Daflubrix	Joan	8	B	4	C.julis	1	8
2014-06-09	1	Mallorca	Daflubrix	Joan	8	B	4	C.julis	1	6
2014-06-09	1	Mallorca	Daflubrix	Joan	8	B	4	D.sargus	1	20
2014-06-09	1	Mallorca	Daflubrix	Joan	8	B	4	D.sargus	1	16
2014-06-09	1	Mallorca	Daflubrix	Joan	8	B	4	D.sargus	1	14
2014-06-09	1	Mallorca	Daflubrix	Joan	8	B	4	D.sargus	1	12
2014-06-09	1	Mallorca	Daflubrix	Joan	8	B	4	D.vulgaris	1	16
2014-06-09	1	Mallorca	Daflubrix	Joan	8	B	4	D.vulgaris	1	16
2014-06-09	1	Mallorca	Daflubrix	Joan	8	B	4	D.vulgaris	1	16
2014-06-09	1	Mallorca	Daflubrix	Joan	8	B	4	S.ocellatus	1	10
2014-06-09	1	Mallorca	Daflubrix	Joan	8	B	4	S.ocellatus	1	10
2014-06-09	1	Mallorca	Daflubrix	Joan	8	B	4	S.ocellatus	1	8
2014-06-09	1	Mallorca	Daflubrix	Joan	8	B	4	S.roisali	1	8
2014-06-09	1	Mallorca	Daflubrix	Joan	8	B	4	S.salpa	1	28
2014-06-09	1	Mallorca	Daflubrix	Joan	8	B	4	S.salpa	1	28
2014-06-09	1	Mallorca	Daflubrix	Joan	8	B	4	S.salpa	1	28
2014-06-09	1	Mallorca	Daflubrix	Joan	8	B	4	S.salpa	1	28
2014-06-09	1	Mallorca	Daflubrix	Joan	8	B	4	S.salpa	1	28
2014-06-09	1	Mallorca	Daflubrix	Joan	8	B	4	S.salpa	1	28
2014-06-09	1	Mallorca	Daflubrix	Joan	8	B	4	S.salpa	1	28
2014-06-09	1	Mallorca	Daflubrix	Joan	8	B	4	S.salpa	1	28
2014-06-09	1	Mallorca	Daflubrix	Joan	8	B	4	S.salpa	1	28
2014-06-09	1	Mallorca	Daflubrix	Joan	8	B	4	S.salpa	1	28
2014-06-09	1	Mallorca	Daflubrix	Joan	8	B	4	S.salpa	1	28
2014-06-09	1	Mallorca	Daflubrix	Joan	8	B	4	S.salpa	1	28
2014-06-09	1	Mallorca	Daflubrix	Joan	8	B	4	S.salpa	1	28
2014-06-09	1	Mallorca	Daflubrix	Joan	8	B	4	S.scriba	1	14
2014-06-09	1	Mallorca	Daflubrix	Joan	8	B	4	S.scriba	1	10
2014-06-09	1	Mallorca	Daflubrix	Joan	8	B	4	S.tinca	1	20
2014-06-09	1	Mallorca	Daflubrix	Joan	8	B	4	S.tinca	1	16
2014-06-09	1	Mallorca	Daflubrix	Joan	8	B	4	S.tinca	1	14
2014-06-09	1	Mallorca	Daflubrix	Joan	8	B	4	S.tinca	1	12
2014-06-09	1	Mallorca	Daflubrix	Joan	8	B	4	S.tinca	1	10
2014-06-09	1	Mallorca	Daflubrix	Joan	8	B	4	S.tinca	1	10
2014-06-09	1	Mallorca	Daflubrix	Joan	8	B	5	C.julis	1	10
2014-06-09	1	Mallorca	Daflubrix	Joan	8	B	5	C.julis	1	10
2014-06-09	1	Mallorca	Daflubrix	Joan	8	B	5	C.julis	1	10
2014-06-09	1	Mallorca	Daflubrix	Joan	8	B	5	C.julis	1	10
2014-06-09	1	Mallorca	Daflubrix	Joan	8	B	5	C.julis	1	8
2014-06-09	1	Mallorca	Daflubrix	Joan	8	B	5	C.julis	1	8
2014-06-09	1	Mallorca	Daflubrix	Joan	8	B	5	D.puntazzo	1	14
2014-06-09	1	Mallorca	Daflubrix	Joan	8	B	5	D.sargus	1	34
2014-06-09	1	Mallorca	Daflubrix	Joan	8	B	5	D.sargus	1	28
2014-06-09	1	Mallorca	Daflubrix	Joan	8	B	5	D.sargus	1	28
2014-06-09	1	Mallorca	Daflubrix	Joan	8	B	5	D.sargus	1	12
2014-06-09	1	Mallorca	Daflubrix	Joan	8	B	5	D.vulgaris	1	16
2014-06-09	1	Mallorca	Daflubrix	Joan	8	B	5	D.vulgaris	1	14
2014-06-09	1	Mallorca	Daflubrix	Joan	8	B	5	D.vulgaris	1	12
2014-06-09	1	Mallorca	Daflubrix	Joan	8	B	5	D.vulgaris	1	12
2014-06-09	1	Mallorca	Daflubrix	Joan	8	B	5	D.vulgaris	1	12
2014-06-09	1	Mallorca	Daflubrix	Joan	8	B	5	D.vulgaris	1	12
2014-06-09	1	Mallorca	Daflubrix	Joan	8	B	5	D.vulgaris	1	12
2014-06-09	1	Mallorca	Daflubrix	Joan	8	B	5	D.vulgaris	1	12
2014-06-09	1	Mallorca	Daflubrix	Joan	8	B	5	D.vulgaris	1	6
2014-06-09	1	Mallorca	Daflubrix	Joan	8	B	5	L.viridis	1	8
2014-06-09	1	Mallorca	Daflubrix	Joan	8	B	5	S.ocellatus	1	8
2014-06-09	1	Mallorca	Daflubrix	Joan	8	B	5	S.ocellatus	1	8
2014-06-09	1	Mallorca	Daflubrix	Joan	8	B	5	S.ocellatus	1	8
2014-06-09	1	Mallorca	Daflubrix	Joan	8	B	5	S.ocellatus	1	8
2014-06-09	1	Mallorca	Daflubrix	Joan	8	B	5	S.ocellatus	1	8
2014-06-09	1	Mallorca	Daflubrix	Joan	8	B	5	S.ocellatus	1	6
2014-06-09	1	Mallorca	Daflubrix	Joan	8	B	5	S.ocellatus	1	4
2014-06-09	1	Mallorca	Daflubrix	Joan	8	B	5	S.roisali	1	10
2014-06-09	1	Mallorca	Daflubrix	Joan	8	B	5	S.roisali	1	10
2014-06-09	1	Mallorca	Daflubrix	Joan	8	B	5	S.roisali	1	8
2014-06-09	1	Mallorca	Daflubrix	Joan	8	B	5	S.roisali	1	8
2014-06-09	1	Mallorca	Daflubrix	Joan	8	B	5	S.salpa	1	24
2014-06-09	1	Mallorca	Daflubrix	Joan	8	B	5	S.salpa	1	24
2014-06-09	1	Mallorca	Daflubrix	Joan	8	B	5	S.salpa	1	24
2014-06-09	1	Mallorca	Daflubrix	Joan	8	B	5	S.salpa	1	24
2014-06-09	1	Mallorca	Daflubrix	Joan	8	B	5	S.salpa	1	24
2014-06-09	1	Mallorca	Daflubrix	Joan	8	B	5	S.salpa	1	24
2014-06-09	1	Mallorca	Daflubrix	Joan	8	B	5	S.salpa	1	24
2014-06-09	1	Mallorca	Daflubrix	Joan	8	B	5	S.salpa	1	24
2014-06-09	1	Mallorca	Daflubrix	Joan	8	B	5	S.salpa	1	24
2014-06-09	1	Mallorca	Daflubrix	Joan	8	B	5	S.salpa	1	24
2014-06-09	1	Mallorca	Daflubrix	Joan	8	B	5	S.salpa	1	24
2014-06-09	1	Mallorca	Daflubrix	Joan	8	B	5	S.salpa	1	24
2014-06-09	1	Mallorca	Daflubrix	Joan	8	B	5	S.salpa	1	24
2014-06-09	1	Mallorca	Daflubrix	Joan	8	B	5	S.salpa	1	24
2014-06-09	1	Mallorca	Daflubrix	Joan	8	B	5	S.salpa	1	24
2014-06-09	1	Mallorca	Daflubrix	Joan	8	B	5	S.salpa	1	24
2014-06-09	1	Mallorca	Daflubrix	Joan	8	B	5	S.scriba	1	12
2014-06-09	1	Mallorca	Daflubrix	Joan	8	B	5	S.scriba	1	12
2014-06-09	1	Mallorca	Daflubrix	Joan	8	B	5	S.scriba	1	10
2014-06-09	1	Mallorca	Daflubrix	Joan	8	B	5	S.tinca	1	18
2014-06-09	1	Mallorca	Daflubrix	Joan	8	B	5	S.tinca	1	16
2014-06-09	1	Mallorca	Daflubrix	Joan	8	B	5	S.tinca	1	16
2014-06-09	1	Mallorca	Daflubrix	Joan	8	B	5	S.tinca	1	12
2014-06-09	1	Mallorca	Daflubrix	Joan	8	B	5	S.tinca	1	10
2014-06-09	1	Mallorca	Daflubrix	Joan	8	B	6	C.julis	1	14
2014-06-09	1	Mallorca	Daflubrix	Joan	8	B	6	C.julis	1	12
2014-06-09	1	Mallorca	Daflubrix	Joan	8	B	6	C.julis	1	10
2014-06-09	1	Mallorca	Daflubrix	Joan	8	B	6	C.julis	1	8
2014-06-09	1	Mallorca	Daflubrix	Joan	8	B	6	C.julis	1	8
2014-06-09	1	Mallorca	Daflubrix	Joan	8	B	6	C.julis	1	8
2014-06-09	1	Mallorca	Daflubrix	Joan	8	B	6	C.julis	1	8
2014-06-09	1	Mallorca	Daflubrix	Joan	8	B	6	C.julis	1	8
2014-06-09	1	Mallorca	Daflubrix	Joan	8	B	6	C.julis	1	8
2014-06-09	1	Mallorca	Daflubrix	Joan	8	B	6	C.julis	1	8
2014-06-09	1	Mallorca	Daflubrix	Joan	8	B	6	C.julis	1	8
2014-06-09	1	Mallorca	Daflubrix	Joan	8	B	6	D.annularis	1	10
2014-06-09	1	Mallorca	Daflubrix	Joan	8	B	6	D.vulgaris	1	6
2014-06-09	1	Mallorca	Daflubrix	Joan	8	B	6	D.vulgaris	1	12
2014-06-09	1	Mallorca	Daflubrix	Joan	8	B	6	D.vulgaris	1	10
2014-06-09	1	Mallorca	Daflubrix	Joan	8	B	6	L.viridis	1	8
2014-06-09	1	Mallorca	Daflubrix	Joan	8	B	6	S.mediterraneus	1	12
2014-06-09	1	Mallorca	Daflubrix	Joan	8	B	6	S.ocellatus	1	10
2014-06-09	1	Mallorca	Daflubrix	Joan	8	B	6	S.ocellatus	1	8
2014-06-09	1	Mallorca	Daflubrix	Joan	8	B	6	S.ocellatus	1	8
2014-06-09	1	Mallorca	Daflubrix	Joan	8	B	6	S.ocellatus	1	8
2014-06-09	1	Mallorca	Daflubrix	Joan	8	B	6	S.ocellatus	1	8
2014-06-09	1	Mallorca	Daflubrix	Joan	8	B	6	S.ocellatus	1	8
2014-06-09	1	Mallorca	Daflubrix	Joan	8	B	6	S.ocellatus	1	4
2014-06-09	1	Mallorca	Daflubrix	Joan	8	B	6	S.ocellatus	1	4
2014-06-09	1	Mallorca	Daflubrix	Joan	8	B	6	S.ocellatus	1	4
2014-06-09	1	Mallorca	Daflubrix	Joan	8	B	6	S.ocellatus	1	4
2014-06-09	1	Mallorca	Daflubrix	Joan	8	B	6	S.roisali	1	10
2014-06-09	1	Mallorca	Daflubrix	Joan	8	B	6	S.rostratus	1	10
2014-06-09	1	Mallorca	Daflubrix	Joan	8	B	6	S.scriba	1	18
2014-06-09	1	Mallorca	Daflubrix	Joan	8	B	6	S.scriba	1	14
2014-06-09	1	Mallorca	Daflubrix	Joan	8	B	6	S.tinca	1	16
2014-06-09	1	Mallorca	Daflubrix	Joan	8	B	6	S.tinca	1	12
2014-06-09	1	Mallorca	Daflubrix	Joan	8	B	6	S.tinca	1	8
2014-06-09	1	Mallorca	Daflubrix	Joan	8	B	6	S.tinca	1	8
2014-06-09	1	Mallorca	Daflubrix	Joan	8	B	6	S.tinca	1	8
2014-06-09	1	Mallorca	Daflubrix	Joan	8	B	6	S.tinca	1	8
2014-06-09	1	Mallorca	Daflubrix	Joan	8	B	6	T.pavo	1	10
2014-06-22	2	Menorca	Res_Integral	Olga	9	A	1	C.julis	1	12
2014-06-22	2	Menorca	Res_Integral	Olga	9	A	1	C.julis	1	12
2014-06-22	2	Menorca	Res_Integral	Olga	9	A	1	C.julis	1	10
2014-06-22	2	Menorca	Res_Integral	Olga	9	A	1	C.julis	1	10
2014-06-22	2	Menorca	Res_Integral	Olga	9	A	1	C.julis	1	10
2014-06-22	2	Menorca	Res_Integral	Olga	9	A	1	C.julis	1	8
2014-06-22	2	Menorca	Res_Integral	Olga	9	A	1	C.julis	1	8
2014-06-22	2	Menorca	Res_Integral	Olga	9	A	1	C.julis	1	8
[truncated: 7,397 more rows]
[truncated: 1 more columns]

## Sheet: Algae quadrates
Date	Campaign	Location	Observer	Station	Site	Transect	Replicate	Morphotype	No of sub quad.	Height cm	No Species
2014-06-02	1	Mallorca	Hilmar	1	A	1	1	1-ET	0	0	0
2014-06-02	1	Mallorca	Hilmar	1	A	1	1	2-SL	5	7	2
2014-06-02	1	Mallorca	Hilmar	1	A	1	1	3-FI	9	7	1
2014-06-02	1	Mallorca	Hilmar	1	A	1	1	4-TU	0	0	0
2014-06-02	1	Mallorca	Hilmar	1	A	1	1	5-PL	0	0	0
2014-06-02	1	Mallorca	Hilmar	1	A	1	1	6-BT	3	5	1
2014-06-02	1	Mallorca	Hilmar	1	A	1	1	7-LB	3	5	1
2014-06-02	1	Mallorca	Hilmar	1	A	1	1	8-TF	25	4	5
2014-06-02	1	Mallorca	Hilmar	1	A	1	1	Barens	0	0	0
2014-06-02	1	Mallorca	Hilmar	1	A	1	2	1-ET	0	0	0
2014-06-02	1	Mallorca	Hilmar	1	A	1	2	2-SL	7	9	1
2014-06-02	1	Mallorca	Hilmar	1	A	1	2	3-FI	16	5	4
2014-06-02	1	Mallorca	Hilmar	1	A	1	2	4-TU	0	0	0
2014-06-02	1	Mallorca	Hilmar	1	A	1	2	5-PL	1	5	1
2014-06-02	1	Mallorca	Hilmar	1	A	1	2	6-BT	2	5	1
2014-06-02	1	Mallorca	Hilmar	1	A	1	2	7-LB	10	5	1
2014-06-02	1	Mallorca	Hilmar	1	A	1	2	8-TF	25	4	5
2014-06-02	1	Mallorca	Hilmar	1	A	1	2	Barens	0	0	0
2014-06-02	1	Mallorca	Hilmar	1	A	1	3	1-ET	0	0	0
2014-06-02	1	Mallorca	Hilmar	1	A	1	3	2-SL	3	10	0
2014-06-02	1	Mallorca	Hilmar	1	A	1	3	3-FI	18	12	1
2014-06-02	1	Mallorca	Hilmar	1	A	1	3	4-TU	0	0	2
2014-06-02	1	Mallorca	Hilmar	1	A	1	3	5-PL	0	0	0
2014-06-02	1	Mallorca	Hilmar	1	A	1	3	6-BT	7	9	0
2014-06-02	1	Mallorca	Hilmar	1	A	1	3	7-LB	7	7	1
2014-06-02	1	Mallorca	Hilmar	1	A	1	3	8-TF	25	5	1
2014-06-02	1	Mallorca	Hilmar	1	A	1	3	Barens	3	0	0
2014-06-02	1	Mallorca	Hilmar	1	A	2	1	1-ET	0	0	0
2014-06-02	1	Mallorca	Hilmar	1	A	2	1	2-SL	13	9	1
2014-06-02	1	Mallorca	Hilmar	1	A	2	1	3-FI	9	7	1
2014-06-02	1	Mallorca	Hilmar	1	A	2	1	4-TU	0	0	0
2014-06-02	1	Mallorca	Hilmar	1	A	2	1	5-PL	6	12	1
2014-06-02	1	Mallorca	Hilmar	1	A	2	1	6-BT	8	7	1
2014-06-02	1	Mallorca	Hilmar	1	A	2	1	7-LB	7	5	1
2014-06-02	1	Mallorca	Hilmar	1	A	2	1	8-TF	25	4	3
2014-06-02	1	Mallorca	Hilmar	1	A	2	1	Barens	3	0	0
2014-06-02	1	Mallorca	Hilmar	1	A	2	2	1-ET	0	0	0
2014-06-02	1	Mallorca	Hilmar	1	A	2	2	2-SL	5	10	1
2014-06-02	1	Mallorca	Hilmar	1	A	2	2	3-FI	4	9	1
2014-06-02	1	Mallorca	Hilmar	1	A	2	2	4-TU	0	0	0
2014-06-02	1	Mallorca	Hilmar	1	A	2	2	5-PL	4	12	1
2014-06-02	1	Mallorca	Hilmar	1	A	2	2	6-BT	1	6	1
2014-06-02	1	Mallorca	Hilmar	1	A	2	2	7-LB	4	4	1
2014-06-02	1	Mallorca	Hilmar	1	A	2	2	8-TF	25	5	2
2014-06-02	1	Mallorca	Hilmar	1	A	2	2	Barens	0	0	0
2014-06-02	1	Mallorca	Hilmar	1	A	2	3	1-ET	0	0	0
2014-06-02	1	Mallorca	Hilmar	1	A	2	3	2-SL	5	9	1
2014-06-02	1	Mallorca	Hilmar	1	A	2	3	3-FI	9	20	1
2014-06-02	1	Mallorca	Hilmar	1	A	2	3	4-TU	0	0	0
2014-06-02	1	Mallorca	Hilmar	1	A	2	3	5-PL	0	0	0
2014-06-02	1	Mallorca	Hilmar	1	A	2	3	6-BT	13	9	1
2014-06-02	1	Mallorca	Hilmar	1	A	2	3	7-LB	8	4	1
2014-06-02	1	Mallorca	Hilmar	1	A	2	3	8-TF	3	5	3
2014-06-02	1	Mallorca	Hilmar	1	A	2	3	Barens	0	0	0
2014-06-02	1	Mallorca	Hilmar	1	A	3	1	1-ET	2	8	1
2014-06-02	1	Mallorca	Hilmar	1	A	3	1	2-SL	0	0	0
2014-06-02	1	Mallorca	Hilmar	1	A	3	1	3-FI	6	7	1
2014-06-02	1	Mallorca	Hilmar	1	A	3	1	4-TU	2	14	1
2014-06-02	1	Mallorca	Hilmar	1	A	3	1	5-PL	2	7	1
2014-06-02	1	Mallorca	Hilmar	1	A	3	1	6-BT	0	0	0
2014-06-02	1	Mallorca	Hilmar	1	A	3	1	7-LB	9	5	1
2014-06-02	1	Mallorca	Hilmar	1	A	3	1	8-TF	14	5	2
2014-06-02	1	Mallorca	Hilmar	1	A	3	1	Barens	3	0	0
2014-06-02	1	Mallorca	Hilmar	1	A	3	2	1-ET	0	0	0
2014-06-02	1	Mallorca	Hilmar	1	A	3	2	2-SL	0	0	0
2014-06-02	1	Mallorca	Hilmar	1	A	3	2	3-FI	0	0	0
2014-06-02	1	Mallorca	Hilmar	1	A	3	2	4-TU	0	0	0
2014-06-02	1	Mallorca	Hilmar	1	A	3	2	5-PL	0	0	0
2014-06-02	1	Mallorca	Hilmar	1	A	3	2	6-BT	0	0	0
2014-06-02	1	Mallorca	Hilmar	1	A	3	2	7-LB	2	5	1
2014-06-02	1	Mallorca	Hilmar	1	A	3	2	8-TF	25	5	1
2014-06-02	1	Mallorca	Hilmar	1	A	3	2	Barens	0	0	0
2014-06-02	1	Mallorca	Hilmar	1	A	3	3	1-ET	0	0	0
2014-06-02	1	Mallorca	Hilmar	1	A	3	3	2-SL	1	5	1
2014-06-02	1	Mallorca	Hilmar	1	A	3	3	3-FI	8	7	1
2014-06-02	1	Mallorca	Hilmar	1	A	3	3	4-TU	2	8	1
2014-06-02	1	Mallorca	Hilmar	1	A	3	3	5-PL	0	0	0
2014-06-02	1	Mallorca	Hilmar	1	A	3	3	6-BT	2	0	1
2014-06-02	1	Mallorca	Hilmar	1	A	3	3	7-LB	9	5	1
2014-06-02	1	Mallorca	Hilmar	1	A	3	3	8-TF	25	5	1
2014-06-02	1	Mallorca	Hilmar	1	A	3	3	Barens	0	0	0
2014-06-02	1	Mallorca	Alvaro	1	B	4	1	1-ET	17	8	1
2014-06-02	1	Mallorca	Alvaro	1	B	4	1	2-SL	3	6.3	1
2014-06-02	1	Mallorca	Alvaro	1	B	4	1	3-FI	2	4	1
2014-06-02	1	Mallorca	Alvaro	1	B	4	1	4-TU	7	9	2
2014-06-02	1	Mallorca	Alvaro	1	B	4	1	5-PL	0	0	0
2014-06-02	1	Mallorca	Alvaro	1	B	4	1	6-BT	8	8	1
2014-06-02	1	Mallorca	Alvaro	1	B	4	1	7-LB	14	4	0
2014-06-02	1	Mallorca	Alvaro	1	B	4	1	8-TF	13	4	3
2014-06-02	1	Mallorca	Alvaro	1	B	4	1	Barens	2	0	0
2014-06-02	1	Mallorca	Alvaro	1	B	4	2	1-ET	3	6	1
2014-06-02	1	Mallorca	Alvaro	1	B	4	2	2-SL	8	10	1
2014-06-02	1	Mallorca	Alvaro	1	B	4	2	3-FI	1	7	1
2014-06-02	1	Mallorca	Alvaro	1	B	4	2	4-TU	6	9	2
2014-06-02	1	Mallorca	Alvaro	1	B	4	2	5-PL	0	0	0
2014-06-02	1	Mallorca	Alvaro	1	B	4	2	6-BT	8	11	1
2014-06-02	1	Mallorca	Alvaro	1	B	4	2	7-LB	17	0	0
2014-06-02	1	Mallorca	Alvaro	1	B	4	2	8-TF	7	4	2
2014-06-02	1	Mallorca	Alvaro	1	B	4	2	Barens	0	0	0
2014-06-02	1	Mallorca	Alvaro	1	B	4	3	1-ET	4	9	1
2014-06-02	1	Mallorca	Alvaro	1	B	4	3	2-SL	11	8	2
2014-06-02	1	Mallorca	Alvaro	1	B	4	3	3-FI	4	7	1
2014-06-02	1	Mallorca	Alvaro	1	B	4	3	4-TU	7	10	2
2014-06-02	1	Mallorca	Alvaro	1	B	4	3	5-PL	0	0	0
2014-06-02	1	Mallorca	Alvaro	1	B	4	3	6-BT	0	0	0
2014-06-02	1	Mallorca	Alvaro	1	B	4	3	7-LB	14	0	0
2014-06-02	1	Mallorca	Alvaro	1	B	4	3	8-TF	15	5	2
2014-06-02	1	Mallorca	Alvaro	1	B	4	3	Barens	0	0	0
2014-06-02	1	Mallorca	Alvaro	1	B	5	1	1-ET	0	0	0
2014-06-02	1	Mallorca	Alvaro	1	B	5	1	2-SL	7	11	2
2014-06-02	1	Mallorca	Alvaro	1	B	5	1	3-FI	0	0	0
2014-06-02	1	Mallorca	Alvaro	1	B	5	1	4-TU	6	7	2
2014-06-02	1	Mallorca	Alvaro	1	B	5	1	5-PL	0	0	0
2014-06-02	1	Mallorca	Alvaro	1	B	5	1	6-BT	3	8	1
2014-06-02	1	Mallorca	Alvaro	1	B	5	1	7-LB	14	3	1
2014-06-02	1	Mallorca	Alvaro	1	B	5	1	8-TF	12	4	3
2014-06-02	1	Mallorca	Alvaro	1	B	5	1	Barens	0	0	0
2014-06-02	1	Mallorca	Alvaro	1	B	5	2	1-ET	0	0	0
2014-06-02	1	Mallorca	Alvaro	1	B	5	2	2-SL	5	11	1
2014-06-02	1	Mallorca	Alvaro	1	B	5	2	3-FI	3	6	1
2014-06-02	1	Mallorca	Alvaro	1	B	5	2	4-TU	13	8.5	3
2014-06-02	1	Mallorca	Alvaro	1	B	5	2	5-PL	0	0	0
2014-06-02	1	Mallorca	Alvaro	1	B	5	2	6-BT	7	11	1
2014-06-02	1	Mallorca	Alvaro	1	B	5	2	7-LB	11	3	1
2014-06-02	1	Mallorca	Alvaro	1	B	5	2	8-TF	14	5	3
2014-06-02	1	Mallorca	Alvaro	1	B	5	2	Barens	0	0	0
2014-06-02	1	Mallorca	Alvaro	1	B	5	3	1-ET	0	0	0
2014-06-02	1	Mallorca	Alvaro	1	B	5	3	2-SL	8	10	2
2014-06-02	1	Mallorca	Alvaro	1	B	5	3	3-FI	4	7	2
2014-06-02	1	Mallorca	Alvaro	1	B	5	3	4-TU	9	9	2
2014-06-02	1	Mallorca	Alvaro	1	B	5	3	5-PL	0	0	0
2014-06-02	1	Mallorca	Alvaro	1	B	5	3	6-BT	9	8	1
2014-06-02	1	Mallorca	Alvaro	1	B	5	3	7-LB	3	0	0
2014-06-02	1	Mallorca	Alvaro	1	B	5	3	8-TF	16	4	2
2014-06-02	1	Mallorca	Alvaro	1	B	5	3	Barens	3	0	0
2014-06-02	1	Mallorca	Alvaro	1	B	6	1	1-ET	6	8	1
2014-06-02	1	Mallorca	Alvaro	1	B	6	1	2-SL	3	7	1
2014-06-02	1	Mallorca	Alvaro	1	B	6	1	3-FI	2	6	1
2014-06-02	1	Mallorca	Alvaro	1	B	6	1	4-TU	5	4	2
2014-06-02	1	Mallorca	Alvaro	1	B	6	1	5-PL	0	0	0
2014-06-02	1	Mallorca	Alvaro	1	B	6	1	6-BT	4	6	1
2014-06-02	1	Mallorca	Alvaro	1	B	6	1	7-LB	16	3	0
2014-06-02	1	Mallorca	Alvaro	1	B	6	1	8-TF	10	5	3
2014-06-02	1	Mallorca	Alvaro	1	B	6	1	Barens	6	0	0
2014-06-02	1	Mallorca	Alvaro	1	B	6	2	1-ET	0	0	0
2014-06-02	1	Mallorca	Alvaro	1	B	6	2	2-SL	4	5	1
2014-06-02	1	Mallorca	Alvaro	1	B	6	2	3-FI	5	7	1
2014-06-02	1	Mallorca	Alvaro	1	B	6	2	4-TU	3	12	1
2014-06-02	1	Mallorca	Alvaro	1	B	6	2	5-PL	0	0	0
2014-06-02	1	Mallorca	Alvaro	1	B	6	2	6-BT	8	8	1
2014-06-02	1	Mallorca	Alvaro	1	B	6	2	7-LB	2	0	0
2014-06-02	1	Mallorca	Alvaro	1	B	6	2	8-TF	20	5	2
2014-06-02	1	Mallorca	Alvaro	1	B	6	2	Barens	12	0	0
2014-06-02	1	Mallorca	Alvaro	1	B	6	3	1-ET	0	0	0
2014-06-02	1	Mallorca	Alvaro	1	B	6	3	2-SL	5	7	1
2014-06-02	1	Mallorca	Alvaro	1	B	6	3	3-FI	3	11	2
2014-06-02	1	Mallorca	Alvaro	1	B	6	3	4-TU	12	8	2
2014-06-02	1	Mallorca	Alvaro	1	B	6	3	5-PL	0	0	0
2014-06-02	1	Mallorca	Alvaro	1	B	6	3	6-BT	8	7	2
2014-06-02	1	Mallorca	Alvaro	1	B	6	3	7-LB	0	0	0
2014-06-02	1	Mallorca	Alvaro	1	B	6	3	8-TF	12	4	3
2014-06-02	1	Mallorca	Alvaro	1	B	6	3	Barens	4	0	0
2014-06-03	1	Mallorca	Hilmar	2	A	1	1	1-ET	7	11	2
2014-06-03	1	Mallorca	Hilmar	2	A	1	1	2-SL	11	9	1
2014-06-03	1	Mallorca	Hilmar	2	A	1	1	3-FI	9	6	1
2014-06-03	1	Mallorca	Hilmar	2	A	1	1	4-TU	0	0	0
2014-06-03	1	Mallorca	Hilmar	2	A	1	1	5-PL	0	0	0
2014-06-03	1	Mallorca	Hilmar	2	A	1	1	6-BT	5	5	0
2014-06-03	1	Mallorca	Hilmar	2	A	1	1	7-LB	0	0	0
2014-06-03	1	Mallorca	Hilmar	2	A	1	1	8-TF	25	5	2
2014-06-03	1	Mallorca	Hilmar	2	A	1	1	Barens	0	0	0
2014-06-03	1	Mallorca	Hilmar	2	A	1	2	1-ET	9	14	2
2014-06-03	1	Mallorca	Hilmar	2	A	1	2	2-SL	8	8	2
2014-06-03	1	Mallorca	Hilmar	2	A	1	2	3-FI	1	5	1
2014-06-03	1	Mallorca	Hilmar	2	A	1	2	4-TU	0	0	0
2014-06-03	1	Mallorca	Hilmar	2	A	1	2	5-PL	1	8	1
2014-06-03	1	Mallorca	Hilmar	2	A	1	2	6-BT	1	5	1
2014-06-03	1	Mallorca	Hilmar	2	A	1	2	7-LB	8	5	8
2014-06-03	1	Mallorca	Hilmar	2	A	1	2	8-TF	25	2	22
2014-06-03	1	Mallorca	Hilmar	2	A	1	2	Barens	0	0	0
2014-06-03	1	Mallorca	Hilmar	2	A	1	3	1-ET	6	7	1
2014-06-03	1	Mallorca	Hilmar	2	A	1	3	2-SL	4	8	1
2014-06-03	1	Mallorca	Hilmar	2	A	1	3	3-FI	6	5	1
2014-06-03	1	Mallorca	Hilmar	2	A	1	3	4-TU	0	0	0
2014-06-03	1	Mallorca	Hilmar	2	A	1	3	5-PL	1	5	1
2014-06-03	1	Mallorca	Hilmar	2	A	1	3	6-BT	0	0	0
2014-06-03	1	Mallorca	Hilmar	2	A	1	3	7-LB	8	5	1
2014-06-03	1	Mallorca	Hilmar	2	A	1	3	8-TF	22	4	3
2014-06-03	1	Mallorca	Hilmar	2	A	1	3	Barens	3	0	0
2014-06-03	1	Mallorca	Hilmar	2	A	2	1	1-ET	13	13	2
2014-06-03	1	Mallorca	Hilmar	2	A	2	1	2-SL	5	11	1
2014-06-03	1	Mallorca	Hilmar	2	A	2	1	3-FI	5	7	1
2014-06-03	1	Mallorca	Hilmar	2	A	2	1	4-TU	4	8	1
2014-06-03	1	Mallorca	Hilmar	2	A	2	1	5-PL	0	0	0
2014-06-03	1	Mallorca	Hilmar	2	A	2	1	6-BT	9	5	1
2014-06-03	1	Mallorca	Hilmar	2	A	2	1	7-LB	7	4	1
2014-06-03	1	Mallorca	Hilmar	2	A	2	1	8-TF	23	4	2
2014-06-03	1	Mallorca	Hilmar	2	A	2	1	Barens	2	0	0
2014-06-03	1	Mallorca	Hilmar	2	A	2	2	1-ET	11	10	2
2014-06-03	1	Mallorca	Hilmar	2	A	2	2	2-SL	7	12	2
2014-06-03	1	Mallorca	Hilmar	2	A	2	2	3-FI	9	10	1
2014-06-03	1	Mallorca	Hilmar	2	A	2	2	4-TU	1	6	1
2014-06-03	1	Mallorca	Hilmar	2	A	2	2	5-PL	10	11	1
2014-06-03	1	Mallorca	Hilmar	2	A	2	2	6-BT	1	0	0
2014-06-03	1	Mallorca	Hilmar	2	A	2	2	7-LB	0	0	0
2014-06-03	1	Mallorca	Hilmar	2	A	2	2	8-TF	25	4	3
2014-06-03	1	Mallorca	Hilmar	2	A	2	2	Barens	0	0	0
2014-06-03	1	Mallorca	Hilmar	2	A	2	3	1-ET	14	11	2
2014-06-03	1	Mallorca	Hilmar	2	A	2	3	2-SL	9	8	1
2014-06-03	1	Mallorca	Hilmar	2	A	2	3	3-FI	6	11	1
2014-06-03	1	Mallorca	Hilmar	2	A	2	3	4-TU	0	0	0
2014-06-03	1	Mallorca	Hilmar	2	A	2	3	5-PL	0	0	0
2014-06-03	1	Mallorca	Hilmar	2	A	2	3	6-BT	0	0	0
2014-06-03	1	Mallorca	Hilmar	2	A	2	3	7-LB	5	4	0
2014-06-03	1	Mallorca	Hilmar	2	A	2	3	8-TF	4	4	2
2014-06-03	1	Mallorca	Hilmar	2	A	2	3	Barens	4	0	0
2014-06-03	1	Mallorca	Hilmar	2	A	3	1	1-ET	12	12	2
2014-06-03	1	Mallorca	Hilmar	2	A	3	1	2-SL	7	11	2
2014-06-03	1	Mallorca	Hilmar	2	A	3	1	3-FI	3	6	1
2014-06-03	1	Mallorca	Hilmar	2	A	3	1	4-TU	1	9	1
2014-06-03	1	Mallorca	Hilmar	2	A	3	1	5-PL	0	0	0
2014-06-03	1	Mallorca	Hilmar	2	A	3	1	6-BT	0	0	0
2014-06-03	1	Mallorca	Hilmar	2	A	3	1	7-LB	9	5	2
2014-06-03	1	Mallorca	Hilmar	2	A	3	1	8-TF	10	6	1
2014-06-03	1	Mallorca	Hilmar	2	A	3	1	Barens	6	0	0
2014-06-03	1	Mallorca	Hilmar	2	A	3	2	1-ET	10	8	2
2014-06-03	1	Mallorca	Hilmar	2	A	3	2	2-SL	9	10	2
2014-06-03	1	Mallorca	Hilmar	2	A	3	2	3-FI	0	0	0
2014-06-03	1	Mallorca	Hilmar	2	A	3	2	4-TU	0	0	0
2014-06-03	1	Mallorca	Hilmar	2	A	3	2	5-PL	0	0	0
2014-06-03	1	Mallorca	Hilmar	2	A	3	2	6-BT	0	0	0
2014-06-03	1	Mallorca	Hilmar	2	A	3	2	7-LB	10	5	1
2014-06-03	1	Mallorca	Hilmar	2	A	3	2	8-TF	23	4	0
2014-06-03	1	Mallorca	Hilmar	2	A	3	2	Barens	0	0	0
2014-06-03	1	Mallorca	Hilmar	2	A	3	3	1-ET	0	0	0
2014-06-03	1	Mallorca	Hilmar	2	A	3	3	2-SL	0	0	0
2014-06-03	1	Mallorca	Hilmar	2	A	3	3	3-FI	0	0	0
2014-06-03	1	Mallorca	Hilmar	2	A	3	3	4-TU	4	8	1
2014-06-03	1	Mallorca	Hilmar	2	A	3	3	5-PL	0	0	0
2014-06-03	1	Mallorca	Hilmar	2	A	3	3	6-BT	11	5	1
2014-06-03	1	Mallorca	Hilmar	2	A	3	3	7-LB	0	0	0
2014-06-03	1	Mallorca	Hilmar	2	A	3	3	8-TF	25	3	2
2014-06-03	1	Mallorca	Hilmar	2	A	3	3	Barens	0	0	0
2014-06-03	1	Mallorca	Alvaro	2	B	4	1	1-ET	3	15	1
2014-06-03	1	Mallorca	Alvaro	2	B	4	1	2-SL	12	14	2
2014-06-03	1	Mallorca	Alvaro	2	B	4	1	3-FI	13	10	1
2014-06-03	1	Mallorca	Alvaro	2	B	4	1	4-TU	144	9	2
2014-06-03	1	Mallorca	Alvaro	2	B	4	1	5-PL	4	8	1
2014-06-03	1	Mallorca	Alvaro	2	B	4	1	6-BT	6	10	1
2014-06-03	1	Mallorca	Alvaro	2	B	4	1	7-LB	5	0	0
2014-06-03	1	Mallorca	Alvaro	2	B	4	1	8-TF	5	4	2
2014-06-03	1	Mallorca	Alvaro	2	B	4	1	Barens	5	0	0
2014-06-03	1	Mallorca	Alvaro	2	B	4	2	1-ET	0	0	0
2014-06-03	1	Mallorca	Alvaro	2	B	4	2	2-SL	7	13	1
2014-06-03	1	Mallorca	Alvaro	2	B	4	2	3-FI	0	0	0
2014-06-03	1	Mallorca	Alvaro	2	B	4	2	4-TU	11	9	2
2014-06-03	1	Mallorca	Alvaro	2	B	4	2	5-PL	0	0	0
2014-06-03	1	Mallorca	Alvaro	2	B	4	2	6-BT	0	0	0
2014-06-03	1	Mallorca	Alvaro	2	B	4	2	7-LB	10	0	0
2014-06-03	1	Mallorca	Alvaro	2	B	4	2	8-TF	15	4	0
2014-06-03	1	Mallorca	Alvaro	2	B	4	2	Barens	0	0	0
2014-06-03	1	Mallorca	Alvaro	2	B	4	3	1-ET	4	12.5	1
2014-06-03	1	Mallorca	Alvaro	2	B	4	3	2-SL	11	12	2
2014-06-03	1	Mallorca	Alvaro	2	B	4	3	3-FI	0	0	0
2014-06-03	1	Mallorca	Alvaro	2	B	4	3	4-TU	3	0	0
2014-06-03	1	Mallorca	Alvaro	2	B	4	3	5-PL	5	8	2
2014-06-03	1	Mallorca	Alvaro	2	B	4	3	6-BT	3	15	1
2014-06-03	1	Mallorca	Alvaro	2	B	4	3	7-LB	3	0	0
2014-06-03	1	Mallorca	Alvaro	2	B	4	3	8-TF	0	0	0
2014-06-03	1	Mallorca	Alvaro	2	B	4	3	Barens	0	0	0
2014-06-03	1	Mallorca	Alvaro	2	B	5	1	1-ET	5	11	1
2014-06-03	1	Mallorca	Alvaro	2	B	5	1	2-SL	9	14	2
2014-06-03	1	Mallorca	Alvaro	2	B	5	1	3-FI	6	9	2
2014-06-03	1	Mallorca	Alvaro	2	B	5	1	4-TU	10	13	2
2014-06-03	1	Mallorca	Alvaro	2	B	5	1	5-PL	4	14	1
2014-06-03	1	Mallorca	Alvaro	2	B	5	1	6-BT	0	0	0
2014-06-03	1	Mallorca	Alvaro	2	B	5	1	7-LB	2	0	0
2014-06-03	1	Mallorca	Alvaro	2	B	5	1	8-TF	15	4	0
2014-06-03	1	Mallorca	Alvaro	2	B	5	1	Barens	7	0	0
2014-06-03	1	Mallorca	Alvaro	2	B	5	2	1-ET	0	0	0
2014-06-03	1	Mallorca	Alvaro	2	B	5	2	2-SL	11	12	2
2014-06-03	1	Mallorca	Alvaro	2	B	5	2	3-FI	2	7	1
2014-06-03	1	Mallorca	Alvaro	2	B	5	2	4-TU	10	9	1
2014-06-03	1	Mallorca	Alvaro	2	B	5	2	5-PL	4	8	1
2014-06-03	1	Mallorca	Alvaro	2	B	5	2	6-BT	3	6	1
2014-06-03	1	Mallorca	Alvaro	2	B	5	2	7-LB	15	0	0
2014-06-03	1	Mallorca	Alvaro	2	B	5	2	8-TF	20	4	0
2014-06-03	1	Mallorca	Alvaro	2	B	5	2	Barens	8	0	0
2014-06-03	1	Mallorca	Alvaro	2	B	5	3	1-ET	1	9	1
2014-06-03	1	Mallorca	Alvaro	2	B	5	3	2-SL	6	11	1
2014-06-03	1	Mallorca	Alvaro	2	B	5	3	3-FI	3	10	1
2014-06-03	1	Mallorca	Alvaro	2	B	5	3	4-TU	2	11	1
2014-06-03	1	Mallorca	Alvaro	2	B	5	3	5-PL	0	0	0
2014-06-03	1	Mallorca	Alvaro	2	B	5	3	6-BT	1	6	5
2014-06-03	1	Mallorca	Alvaro	2	B	5	3	7-LB	14	0	0
2014-06-03	1	Mallorca	Alvaro	2	B	5	3	8-TF	17	4	0
2014-06-03	1	Mallorca	Alvaro	2	B	5	3	Barens	5	0	0
2014-06-03	1	Mallorca	Alvaro	2	B	6	1	1-ET	1	5	1
2014-06-03	1	Mallorca	Alvaro	2	B	6	1	2-SL	0	0	0
2014-06-03	1	Mallorca	Alvaro	2	B	6	1	3-FI	0	0	0
2014-06-03	1	Mallorca	Alvaro	2	B	6	1	4-TU	7	7	2
2014-06-03	1	Mallorca	Alvaro	2	B	6	1	5-PL	0	0	0
2014-06-03	1	Mallorca	Alvaro	2	B	6	1	6-BT	11	12	0
2014-06-03	1	Mallorca	Alvaro	2	B	6	1	7-LB	9	3	1
2014-06-03	1	Mallorca	Alvaro	2	B	6	1	8-TF	21	4	2
2014-06-03	1	Mallorca	Alvaro	2	B	6	1	Barens	4	0	0
2014-06-03	1	Mallorca	Alvaro	2	B	6	2	1-ET	2	9	0
2014-06-03	1	Mallorca	Alvaro	2	B	6	2	2-SL	4	14	1
2014-06-03	1	Mallorca	Alvaro	2	B	6	2	3-FI	4	15	1
2014-06-03	1	Mallorca	Alvaro	2	B	6	2	4-TU	7	11	2
2014-06-03	1	Mallorca	Alvaro	2	B	6	2	5-PL	0	0	0
2014-06-03	1	Mallorca	Alvaro	2	B	6	2	6-BT	4	10	0
2014-06-03	1	Mallorca	Alvaro	2	B	6	2	7-LB	0	0	0
2014-06-03	1	Mallorca	Alvaro	2	B	6	2	8-TF	14	4	0
2014-06-03	1	Mallorca	Alvaro	2	B	6	2	Barens	0	0	0
2014-06-03	1	Mallorca	Alvaro	2	B	6	3	1-ET	0	0	0
2014-06-03	1	Mallorca	Alvaro	2	B	6	3	2-SL	4	10	1
2014-06-03	1	Mallorca	Alvaro	2	B	6	3	3-FI	3	8	1
2014-06-03	1	Mallorca	Alvaro	2	B	6	3	4-TU	1	7	1
2014-06-03	1	Mallorca	Alvaro	2	B	6	3	5-PL	0	0	0
2014-06-03	1	Mallorca	Alvaro	2	B	6	3	6-BT	0	0	0
2014-06-03	1	Mallorca	Alvaro	2	B	6	3	7-LB	9	0	0
2014-06-03	1	Mallorca	Alvaro	2	B	6	3	8-TF	15	4	0
2014-06-03	1	Mallorca	Alvaro	2	B	6	3	Barens	0	0	0
2014-05-04	1	Mallorca	Hilmar	3	A	1	1	1-ET	12	9	1
2014-05-04	1	Mallorca	Hilmar	3	A	1	1	2-SL	3	5	1
2014-05-04	1	Mallorca	Hilmar	3	A	1	1	3-FI	5	8	7
2014-05-04	1	Mallorca	Hilmar	3	A	1	1	4-TU	0	0	0
2014-05-04	1	Mallorca	Hilmar	3	A	1	1	5-PL	0	0	0
2014-05-04	1	Mallorca	Hilmar	3	A	1	1	6-BT	0	0	0
2014-05-04	1	Mallorca	Hilmar	3	A	1	1	7-LB	6	3	1
2014-05-04	1	Mallorca	Hilmar	3	A	1	1	8-TF	3	4	1
2014-05-04	1	Mallorca	Hilmar	3	A	1	1	Barens	15	0	0
2014-05-04	1	Mallorca	Hilmar	3	A	1	2	1-ET	17	8	2
2014-05-04	1	Mallorca	Hilmar	3	A	1	2	2-SL	8	7	1
2014-05-04	1	Mallorca	Hilmar	3	A	1	2	3-FI	9	8	2
2014-05-04	1	Mallorca	Hilmar	3	A	1	2	4-TU	0	0	0
2014-05-04	1	Mallorca	Hilmar	3	A	1	2	5-PL	4	5	1
2014-05-04	1	Mallorca	Hilmar	3	A	1	2	6-BT	0	0	0
2014-05-04	1	Mallorca	Hilmar	3	A	1	2	7-LB	0	0	0
2014-05-04	1	Mallorca	Hilmar	3	A	1	2	8-TF	11	4	1
2014-05-04	1	Mallorca	Hilmar	3	A	1	2	Barens	1	0	0
2014-05-04	1	Mallorca	Hilmar	3	A	1	3	1-ET	23	10	1
2014-05-04	1	Mallorca	Hilmar	3	A	1	3	2-SL	2	8	1
2014-05-04	1	Mallorca	Hilmar	3	A	1	3	3-FI	3	7	1
2014-05-04	1	Mallorca	Hilmar	3	A	1	3	4-TU	0	0	0
2014-05-04	1	Mallorca	Hilmar	3	A	1	3	5-PL	0	0	0
2014-05-04	1	Mallorca	Hilmar	3	A	1	3	6-BT	0	0	0
2014-05-04	1	Mallorca	Hilmar	3	A	1	3	7-LB	4	5	1
2014-05-04	1	Mallorca	Hilmar	3	A	1	3	8-TF	10	4	1
2014-05-04	1	Mallorca	Hilmar	3	A	1	3	Barens	4	0	0
2014-05-04	1	Mallorca	Hilmar	3	A	2	1	1-ET	18	9	2
2014-05-04	1	Mallorca	Hilmar	3	A	2	1	2-SL	5	10	1
2014-05-04	1	Mallorca	Hilmar	3	A	2	1	3-FI	10	9	1
2014-05-04	1	Mallorca	Hilmar	3	A	2	1	4-TU	0	0	0
2014-05-04	1	Mallorca	Hilmar	3	A	2	1	5-PL	0	0	0
2014-05-04	1	Mallorca	Hilmar	3	A	2	1	6-BT	0	0	0
2014-05-04	1	Mallorca	Hilmar	3	A	2	1	7-LB	2	4	1
2014-05-04	1	Mallorca	Hilmar	3	A	2	1	8-TF	3	4	1
2014-05-04	1	Mallorca	Hilmar	3	A	2	1	Barens	0	0	0
2014-05-04	1	Mallorca	Hilmar	3	A	2	2	1-ET	16	12	1
2014-05-04	1	Mallorca	Hilmar	3	A	2	2	2-SL	5	10	1
2014-05-04	1	Mallorca	Hilmar	3	A	2	2	3-FI	5	6	0
2014-05-04	1	Mallorca	Hilmar	3	A	2	2	4-TU	0	0	0
2014-05-04	1	Mallorca	Hilmar	3	A	2	2	5-PL	0	0	0
2014-05-04	1	Mallorca	Hilmar	3	A	2	2	6-BT	5	7	1
2014-05-04	1	Mallorca	Hilmar	3	A	2	2	7-LB	3	4	1
2014-05-04	1	Mallorca	Hilmar	3	A	2	2	8-TF	11	4	1
2014-05-04	1	Mallorca	Hilmar	3	A	2	2	Barens	6	0	0
2014-05-04	1	Mallorca	Hilmar	3	A	2	3	1-ET	17	11	2
2014-05-04	1	Mallorca	Hilmar	3	A	2	3	2-SL	3	9	1
2014-05-04	1	Mallorca	Hilmar	3	A	2	3	3-FI	10	7	1
2014-05-04	1	Mallorca	Hilmar	3	A	2	3	4-TU	0	0	0
2014-05-04	1	Mallorca	Hilmar	3	A	2	3	5-PL	0	0	0
2014-05-04	1	Mallorca	Hilmar	3	A	2	3	6-BT	0	0	0
2014-05-04	1	Mallorca	Hilmar	3	A	2	3	7-LB	0	0	0
2014-05-04	1	Mallorca	Hilmar	3	A	2	3	8-TF	14	4	1
2014-05-04	1	Mallorca	Hilmar	3	A	2	3	Barens	0	0	0
2014-05-04	1	Mallorca	Hilmar	3	A	3	1	1-ET	21	11	1
2014-05-04	1	Mallorca	Hilmar	3	A	3	1	2-SL	2	9	1
2014-05-04	1	Mallorca	Hilmar	3	A	3	1	3-FI	5	8	1
2014-05-04	1	Mallorca	Hilmar	3	A	3	1	4-TU	0	0	0
2014-05-04	1	Mallorca	Hilmar	3	A	3	1	5-PL	0	0	0
2014-05-04	1	Mallorca	Hilmar	3	A	3	1	6-BT	0	0	0
2014-05-04	1	Mallorca	Hilmar	3	A	3	1	7-LB	0	0	0
2014-05-04	1	Mallorca	Hilmar	3	A	3	1	8-TF	2	4	0
2014-05-04	1	Mallorca	Hilmar	3	A	3	1	Barens	2	0	0
2014-05-04	1	Mallorca	Hilmar	3	A	3	2	1-ET	12	12	2
2014-05-04	1	Mallorca	Hilmar	3	A	3	2	2-SL	3	9	2
2014-05-04	1	Mallorca	Hilmar	3	A	3	2	3-FI	3	8	1
2014-05-04	1	Mallorca	Hilmar	3	A	3	2	4-TU	0	0	0
2014-05-04	1	Mallorca	Hilmar	3	A	3	2	5-PL	1	7	1
2014-05-04	1	Mallorca	Hilmar	3	A	3	2	6-BT	0	0	0
2014-05-04	1	Mallorca	Hilmar	3	A	3	2	7-LB	0	0	0
2014-05-04	1	Mallorca	Hilmar	3	A	3	2	8-TF	3	4	1
2014-05-04	1	Mallorca	Hilmar	3	A	3	2	Barens	0	0	0
2014-05-04	1	Mallorca	Hilmar	3	A	3	3	1-ET	25	10	1
2014-05-04	1	Mallorca	Hilmar	3	A	3	3	2-SL	4	8	2
2014-05-04	1	Mallorca	Hilmar	3	A	3	3	3-FI	2	7	1
2014-05-04	1	Mallorca	Hilmar	3	A	3	3	4-TU	0	0	0
2014-05-04	1	Mallorca	Hilmar	3	A	3	3	5-PL	1	8	1
2014-05-04	1	Mallorca	Hilmar	3	A	3	3	6-BT	0	0	0
2014-05-04	1	Mallorca	Hilmar	3	A	3	3	7-LB	0	0	0
2014-05-04	1	Mallorca	Hilmar	3	A	3	3	8-TF	0	0	0
2014-05-04	1	Mallorca	Hilmar	3	A	3	3	Barens	5	0	0
2014-05-04	1	Mallorca	Alvaro	3	B	4	1	1-ET	2	6	1
2014-05-04	1	Mallorca	Alvaro	3	B	4	1	2-SL	0	0	0
2014-05-04	1	Mallorca	Alvaro	3	B	4	1	3-FI	0	0	0
2014-05-04	1	Mallorca	Alvaro	3	B	4	1	4-TU	2	11.5	2
2014-05-04	1	Mallorca	Alvaro	3	B	4	1	5-PL	0	0	0
2014-05-04	1	Mallorca	Alvaro	3	B	4	1	6-BT	3	9	1
2014-05-04	1	Mallorca	Alvaro	3	B	4	1	7-LB	2	0	0
2014-05-04	1	Mallorca	Alvaro	3	B	4	1	8-TF	25	4	3
2014-05-04	1	Mallorca	Alvaro	3	B	4	1	Barens	0	0	0
2014-05-04	1	Mallorca	Alvaro	3	B	4	2	1-ET	4	8.5	1
2014-05-04	1	Mallorca	Alvaro	3	B	4	2	2-SL	5	9	2
2014-05-04	1	Mallorca	Alvaro	3	B	4	2	3-FI	2	7	1
2014-05-04	1	Mallorca	Alvaro	3	B	4	2	4-TU	5	9.5	2
2014-05-04	1	Mallorca	Alvaro	3	B	4	2	5-PL	0	0	0
2014-05-04	1	Mallorca	Alvaro	3	B	4	2	6-BT	7	9	1
2014-05-04	1	Mallorca	Alvaro	3	B	4	2	7-LB	15	0	0
2014-05-04	1	Mallorca	Alvaro	3	B	4	2	8-TF	20	4	2
2014-05-04	1	Mallorca	Alvaro	3	B	4	2	Barens	0	0	0
2014-05-04	1	Mallorca	Alvaro	3	B	4	3	1-ET	0	0	0
2014-05-04	1	Mallorca	Alvaro	3	B	4	3	2-SL	4	8	1
2014-05-04	1	Mallorca	Alvaro	3	B	4	3	3-FI	4	10	1
2014-05-04	1	Mallorca	Alvaro	3	B	4	3	4-TU	0	0	0
2014-05-04	1	Mallorca	Alvaro	3	B	4	3	5-PL	0	0	0
2014-05-04	1	Mallorca	Alvaro	3	B	4	3	6-BT	4	10.5	0
2014-05-04	1	Mallorca	Alvaro	3	B	4	3	7-LB	4	0	0
2014-05-04	1	Mallorca	Alvaro	3	B	4	3	8-TF	23	4	2
2014-05-04	1	Mallorca	Alvaro	3	B	4	3	Barens	0	0	0
2014-05-04	1	Mallorca	Alvaro	3	B	5	1	1-ET	3	7	1
2014-05-04	1	Mallorca	Alvaro	3	B	5	1	2-SL	1	8	1
2014-05-04	1	Mallorca	Alvaro	3	B	5	1	3-FI	0	0	0
2014-05-04	1	Mallorca	Alvaro	3	B	5	1	4-TU	4	12	2
2014-05-04	1	Mallorca	Alvaro	3	B	5	1	5-PL	0	0	0
2014-05-04	1	Mallorca	Alvaro	3	B	5	1	6-BT	13	9	1
2014-05-04	1	Mallorca	Alvaro	3	B	5	1	7-LB	15	3	0
2014-05-04	1	Mallorca	Alvaro	3	B	5	1	8-TF	17	4	1
2014-05-04	1	Mallorca	Alvaro	3	B	5	1	Barens	0	0	0
2014-05-04	1	Mallorca	Alvaro	3	B	5	2	1-ET	4	13	1
2014-05-04	1	Mallorca	Alvaro	3	B	5	2	2-SL	0	0	0
2014-05-04	1	Mallorca	Alvaro	3	B	5	2	3-FI	0	0	0
2014-05-04	1	Mallorca	Alvaro	3	B	5	2	4-TU	0	0	0
2014-05-04	1	Mallorca	Alvaro	3	B	5	2	5-PL	0	0	0
2014-05-04	1	Mallorca	Alvaro	3	B	5	2	6-BT	3	7	1
2014-05-04	1	Mallorca	Alvaro	3	B	5	2	7-LB	5	0	0
2014-05-04	1	Mallorca	Alvaro	3	B	5	2	8-TF	18	4	1
2014-05-04	1	Mallorca	Alvaro	3	B	5	2	Barens	0	0	0
2014-05-04	1	Mallorca	Alvaro	3	B	5	3	1-ET	4	11	1
2014-05-04	1	Mallorca	Alvaro	3	B	5	3	2-SL	1	4	1
2014-05-04	1	Mallorca	Alvaro	3	B	5	3	3-FI	1	5	1
2014-05-04	1	Mallorca	Alvaro	3	B	5	3	4-TU	1	9	1
2014-05-04	1	Mallorca	Alvaro	3	B	5	3	5-PL	0	0	0
2014-05-04	1	Mallorca	Alvaro	3	B	5	3	6-BT	5	12	1
2014-05-04	1	Mallorca	Alvaro	3	B	5	3	7-LB	2	0	0
2014-05-04	1	Mallorca	Alvaro	3	B	5	3	8-TF	22	3	3
2014-05-04	1	Mallorca	Alvaro	3	B	5	3	Barens	0	0	0
2014-05-04	1	Mallorca	Alvaro	3	B	6	1	1-ET	22	12	2
2014-05-04	1	Mallorca	Alvaro	3	B	6	1	2-SL	1	8.5	1
2014-05-04	1	Mallorca	Alvaro	3	B	6	1	3-FI	10	8	1
2014-05-04	1	Mallorca	Alvaro	3	B	6	1	4-TU	2	6	1
2014-05-04	1	Mallorca	Alvaro	3	B	6	1	5-PL	3	9	1
2014-05-04	1	Mallorca	Alvaro	3	B	6	1	6-BT	1	9	1
2014-05-04	1	Mallorca	Alvaro	3	B	6	1	7-LB	4	0	0
2014-05-04	1	Mallorca	Alvaro	3	B	6	1	8-TF	1	4	0
2014-05-04	1	Mallorca	Alvaro	3	B	6	1	Barens	0	0	0
2014-05-04	1	Mallorca	Alvaro	3	B	6	2	1-ET	20	13	3
2014-05-04	1	Mallorca	Alvaro	3	B	6	2	2-SL	5	8	1
2014-05-04	1	Mallorca	Alvaro	3	B	6	2	3-FI	0	0	0
2014-05-04	1	Mallorca	Alvaro	3	B	6	2	4-TU	2	5	1
2014-05-04	1	Mallorca	Alvaro	3	B	6	2	5-PL	3	8.5	1
2014-05-04	1	Mallorca	Alvaro	3	B	6	2	6-BT	2	7	1
2014-05-04	1	Mallorca	Alvaro	3	B	6	2	7-LB	8	0	0
2014-05-04	1	Mallorca	Alvaro	3	B	6	2	8-TF	9	4	0
2014-05-04	1	Mallorca	Alvaro	3	B	6	2	Barens	0	0	0
2014-05-04	1	Mallorca	Alvaro	3	B	6	3	1-ET	15	13	1
2014-05-04	1	Mallorca	Alvaro	3	B	6	3	2-SL	7	15	2
2014-05-04	1	Mallorca	Alvaro	3	B	6	3	3-FI	4	6	1
2014-05-04	1	Mallorca	Alvaro	3	B	6	3	4-TU	1	4	1
2014-05-04	1	Mallorca	Alvaro	3	B	6	3	5-PL	3	14	1
2014-05-04	1	Mallorca	Alvaro	3	B	6	3	6-BT	0	0	0
2014-05-04	1	Mallorca	Alvaro	3	B	6	3	7-LB	13	0	0
2014-05-04	1	Mallorca	Alvaro	3	B	6	3	8-TF	3	4	0
2014-05-04	1	Mallorca	Alvaro	3	B	6	3	Barens	0	0	0
2014-06-05	1	Mallorca	Alvaro	4	B	4	1	1-ET	8	11	2
2014-06-05	1	Mallorca	Alvaro	4	B	4	1	2-SL	0	0	0
2014-06-05	1	Mallorca	Alvaro	4	B	4	1	3-FI	13	10	1
2014-06-05	1	Mallorca	Alvaro	4	B	4	1	4-TU	11	10.5	1
2014-06-05	1	Mallorca	Alvaro	4	B	4	1	5-PL	2	9	1
2014-06-05	1	Mallorca	Alvaro	4	B	4	1	6-BT	3	10	1
2014-06-05	1	Mallorca	Alvaro	4	B	4	1	7-LB	8	0	0
2014-06-05	1	Mallorca	Alvaro	4	B	4	1	8-TF	23	4	2
2014-06-05	1	Mallorca	Alvaro	4	B	4	1	Barens	0	0	0
2014-06-05	1	Mallorca	Alvaro	4	B	4	2	1-ET	2	12	1
2014-06-05	1	Mallorca	Alvaro	4	B	4	2	2-SL	0	0	0
2014-06-05	1	Mallorca	Alvaro	4	B	4	2	3-FI	22	11	1
2014-06-05	1	Mallorca	Alvaro	4	B	4	2	4-TU	14	7	1
2014-06-05	1	Mallorca	Alvaro	4	B	4	2	5-PL	2	10	1
2014-06-05	1	Mallorca	Alvaro	4	B	4	2	6-BT	0	0	0
2014-06-05	1	Mallorca	Alvaro	4	B	4	2	7-LB	3	0	0
2014-06-05	1	Mallorca	Alvaro	4	B	4	2	8-TF	21	4	2
2014-06-05	1	Mallorca	Alvaro	4	B	4	2	Barens	0	0	0
2014-06-05	1	Mallorca	Alvaro	4	B	4	3	1-ET	6	13	1
2014-06-05	1	Mallorca	Alvaro	4	B	4	3	2-SL	3	8	1
2014-06-05	1	Mallorca	Alvaro	4	B	4	3	3-FI	14	9	1
2014-06-05	1	Mallorca	Alvaro	4	B	4	3	4-TU	12	8	1
2014-06-05	1	Mallorca	Alvaro	4	B	4	3	5-PL	0	0	0
2014-06-05	1	Mallorca	Alvaro	4	B	4	3	6-BT	0	0	0
2014-06-05	1	Mallorca	Alvaro	4	B	4	3	7-LB	10	3	0
2014-06-05	1	Mallorca	Alvaro	4	B	4	3	8-TF	25	4	2
2014-06-05	1	Mallorca	Alvaro	4	B	4	3	Barens	0	0	0
2014-06-05	1	Mallorca	Alvaro	4	B	5	1	1-ET	5	10	1
2014-06-05	1	Mallorca	Alvaro	4	B	5	1	2-SL	3	7	1
2014-06-05	1	Mallorca	Alvaro	4	B	5	1	3-FI	3	12	1
2014-06-05	1	Mallorca	Alvaro	4	B	5	1	4-TU	16	9	2
2014-06-05	1	Mallorca	Alvaro	4	B	5	1	5-PL	0	0	0
2014-06-05	1	Mallorca	Alvaro	4	B	5	1	6-BT	3	11	1
2014-06-05	1	Mallorca	Alvaro	4	B	5	1	7-LB	12	0	0
2014-06-05	1	Mallorca	Alvaro	4	B	5	1	8-TF	24	4	1
2014-06-05	1	Mallorca	Alvaro	4	B	5	1	Barens	0	0	0
2014-06-05	1	Mallorca	Alvaro	4	B	5	2	1-ET	14	10.5	0
2014-06-05	1	Mallorca	Alvaro	4	B	5	2	2-SL	1	14	1
2014-06-05	1	Mallorca	Alvaro	4	B	5	2	3-FI	18	15	1
2014-06-05	1	Mallorca	Alvaro	4	B	5	2	4-TU	6	9	1
2014-06-05	1	Mallorca	Alvaro	4	B	5	2	5-PL	0	0	0
2014-06-05	1	Mallorca	Alvaro	4	B	5	2	6-BT	0	0	0
2014-06-05	1	Mallorca	Alvaro	4	B	5	2	7-LB	5	0	0
2014-06-05	1	Mallorca	Alvaro	4	B	5	2	8-TF	10	4	1
2014-06-05	1	Mallorca	Alvaro	4	B	5	2	Barens	0	0	0
2014-06-05	1	Mallorca	Alvaro	4	B	5	3	1-ET	18	9	2
2014-06-05	1	Mallorca	Alvaro	4	B	5	3	2-SL	8	8	1
2014-06-05	1	Mallorca	Alvaro	4	B	5	3	3-FI	15	11	1
2014-06-05	1	Mallorca	Alvaro	4	B	5	3	4-TU	7	8	2
2014-06-05	1	Mallorca	Alvaro	4	B	5	3	5-PL	0	0	0
2014-06-05	1	Mallorca	Alvaro	4	B	5	3	6-BT	1	0	0
2014-06-05	1	Mallorca	Alvaro	4	B	5	3	7-LB	7	0	0
2014-06-05	1	Mallorca	Alvaro	4	B	5	3	8-TF	20	4	2
2014-06-05	1	Mallorca	Alvaro	4	B	5	3	Barens	0	0	0
2014-06-05	1	Mallorca	Alvaro	4	B	6	1	1-ET	4	8	1
2014-06-05	1	Mallorca	Alvaro	4	B	6	1	2-SL	2	9.5	1
2014-06-05	1	Mallorca	Alvaro	4	B	6	1	3-FI	6	8	2
2014-06-05	1	Mallorca	Alvaro	4	B	6	1	4-TU	7	12	1
2014-06-05	1	Mallorca	Alvaro	4	B	6	1	5-PL	0	0	0
2014-06-05	1	Mallorca	Alvaro	4	B	6	1	6-BT	0	0	0
2014-06-05	1	Mallorca	Alvaro	4	B	6	1	7-LB	4	0	0
2014-06-05	1	Mallorca	Alvaro	4	B	6	1	8-TF	10	4	3
2014-06-05	1	Mallorca	Alvaro	4	B	6	1	Barens	0	0	0
2014-06-05	1	Mallorca	Alvaro	4	B	6	2	1-ET	19	9	2
2014-06-05	1	Mallorca	Alvaro	4	B	6	2	2-SL	3	7	1
2014-06-05	1	Mallorca	Alvaro	4	B	6	2	3-FI	4	7	1
2014-06-05	1	Mallorca	Alvaro	4	B	6	2	4-TU	2	8	1
2014-06-05	1	Mallorca	Alvaro	4	B	6	2	5-PL	0	0	0
2014-06-05	1	Mallorca	Alvaro	4	B	6	2	6-BT	3	5	1
2014-06-05	1	Mallorca	Alvaro	4	B	6	2	7-LB	5	0	0
2014-06-05	1	Mallorca	Alvaro	4	B	6	2	8-TF	22	4	1
2014-06-05	1	Mallorca	Alvaro	4	B	6	2	Barens	0	0	0
2014-06-05	1	Mallorca	Alvaro	4	B	6	3	1-ET	7	16	2
2014-06-05	1	Mallorca	Alvaro	4	B	6	3	2-SL	5	11	1
2014-06-05	1	Mallorca	Alvaro	4	B	6	3	3-FI	0	0	0
2014-06-05	1	Mallorca	Alvaro	4	B	6	3	4-TU	6	9	1
2014-06-05	1	Mallorca	Alvaro	4	B	6	3	5-PL	0	0	0
2014-06-05	1	Mallorca	Alvaro	4	B	6	3	6-BT	0	0	0
2014-06-05	1	Mallorca	Alvaro	4	B	6	3	7-LB	12	3	0
2014-06-05	1	Mallorca	Alvaro	4	B	6	3	8-TF	17	4	0
2014-06-05	1	Mallorca	Alvaro	4	B	6	3	Barens	0	0	0
2014-06-05	1	Mallorca	Hilmar	4	A	1	1	1-ET	13	11	1
2014-06-05	1	Mallorca	Hilmar	4	A	1	1	2-SL	8	12	2
2014-06-05	1	Mallorca	Hilmar	4	A	1	1	3-FI	2	8	1
2014-06-05	1	Mallorca	Hilmar	4	A	1	1	4-TU	0	0	0
2014-06-05	1	Mallorca	Hilmar	4	A	1	1	5-PL	0	0	0
2014-06-05	1	Mallorca	Hilmar	4	A	1	1	6-BT	0	0	0
2014-06-05	1	Mallorca	Hilmar	4	A	1	1	7-LB	8	7	1
2014-06-05	1	Mallorca	Hilmar	4	A	1	1	8-TF	10	4	1
2014-06-05	1	Mallorca	Hilmar	4	A	1	1	Barens	0	0	0
2014-06-05	1	Mallorca	Hilmar	4	A	1	2	1-ET	2	9	1
2014-06-05	1	Mallorca	Hilmar	4	A	1	2	2-SL	7	9	3
2014-06-05	1	Mallorca	Hilmar	4	A	1	2	3-FI	7	8	1
2014-06-05	1	Mallorca	Hilmar	4	A	1	2	4-TU	4	10	1
2014-06-05	1	Mallorca	Hilmar	4	A	1	2	5-PL	0	0	0
2014-06-05	1	Mallorca	Hilmar	4	A	1	2	6-BT	0	0	0
2014-06-05	1	Mallorca	Hilmar	4	A	1	2	7-LB	3	5	1
2014-06-05	1	Mallorca	Hilmar	4	A	1	2	8-TF	12	4	0
2014-06-05	1	Mallorca	Hilmar	4	A	1	2	Barens	0	0	0
2014-06-05	1	Mallorca	Hilmar	4	A	1	3	1-ET	0	0	0
2014-06-05	1	Mallorca	Hilmar	4	A	1	3	2-SL	4	8	1
2014-06-05	1	Mallorca	Hilmar	4	A	1	3	3-FI	4	7	1
2014-06-05	1	Mallorca	Hilmar	4	A	1	3	4-TU	5	10	1
2014-06-05	1	Mallorca	Hilmar	4	A	1	3	5-PL	1	18	1
2014-06-05	1	Mallorca	Hilmar	4	A	1	3	6-BT	4	4	1
2014-06-05	1	Mallorca	Hilmar	4	A	1	3	7-LB	0	0	0
2014-06-05	1	Mallorca	Hilmar	4	A	1	3	8-TF	15	4	3
2014-06-05	1	Mallorca	Hilmar	4	A	1	3	Barens	0	0	0
2014-06-05	1	Mallorca	Hilmar	4	A	2	1	1-ET	0	0	0
2014-06-05	1	Mallorca	Hilmar	4	A	2	1	2-SL	6	7	2
2014-06-05	1	Mallorca	Hilmar	4	A	2	1	3-FI	10	6	1
2014-06-05	1	Mallorca	Hilmar	4	A	2	1	4-TU	0	0	0
2014-06-05	1	Mallorca	Hilmar	4	A	2	1	5-PL	11	10	1
2014-06-05	1	Mallorca	Hilmar	4	A	2	1	6-BT	0	0	0
2014-06-05	1	Mallorca	Hilmar	4	A	2	1	7-LB	0	0	0
2014-06-05	1	Mallorca	Hilmar	4	A	2	1	8-TF	25	4	2
2014-06-05	1	Mallorca	Hilmar	4	A	2	1	Barens	0	0	0
2014-06-05	1	Mallorca	Hilmar	4	A	2	2	1-ET	0	0	0
2014-06-05	1	Mallorca	Hilmar	4	A	2	2	2-SL	16	10	2
2014-06-05	1	Mallorca	Hilmar	4	A	2	2	3-FI	2	7	1
2014-06-05	1	Mallorca	Hilmar	4	A	2	2	4-TU	0	0	0
2014-06-05	1	Mallorca	Hilmar	4	A	2	2	5-PL	5	17	1
2014-06-05	1	Mallorca	Hilmar	4	A	2	2	6-BT	0	0	0
2014-06-05	1	Mallorca	Hilmar	4	A	2	2	7-LB	0	0	0
2014-06-05	1	Mallorca	Hilmar	4	A	2	2	8-TF	23	4	2
2014-06-05	1	Mallorca	Hilmar	4	A	2	2	Barens	0	0	0
2014-06-05	1	Mallorca	Hilmar	4	A	2	3	1-ET	0	0	0
2014-06-05	1	Mallorca	Hilmar	4	A	2	3	2-SL	9	8	2
2014-06-05	1	Mallorca	Hilmar	4	A	2	3	3-FI	9	9	1
2014-06-05	1	Mallorca	Hilmar	4	A	2	3	4-TU	0	0	0
2014-06-05	1	Mallorca	Hilmar	4	A	2	3	5-PL	3	18	1
2014-06-05	1	Mallorca	Hilmar	4	A	2	3	6-BT	0	0	0
2014-06-05	1	Mallorca	Hilmar	4	A	2	3	7-LB	0	0	0
2014-06-05	1	Mallorca	Hilmar	4	A	2	3	8-TF	23	4	2
2014-06-05	1	Mallorca	Hilmar	4	A	2	3	Barens	0	0	0
2014-06-05	1	Mallorca	Hilmar	4	A	3	1	1-ET	0	0	0
2014-06-05	1	Mallorca	Hilmar	4	A	3	1	2-SL	7	9	7
2014-06-05	1	Mallorca	Hilmar	4	A	3	1	3-FI	1	8	1
2014-06-05	1	Mallorca	Hilmar	4	A	3	1	4-TU	0	0	0
2014-06-05	1	Mallorca	Hilmar	4	A	3	1	5-PL	14	20	1
2014-06-05	1	Mallorca	Hilmar	4	A	3	1	6-BT	0	0	0
2014-06-05	1	Mallorca	Hilmar	4	A	3	1	7-LB	0	0	0
2014-06-05	1	Mallorca	Hilmar	4	A	3	1	8-TF	15	4	2
2014-06-05	1	Mallorca	Hilmar	4	A	3	1	Barens	0	0	0
2014-06-05	1	Mallorca	Hilmar	4	A	3	2	1-ET	0	0	0
2014-06-05	1	Mallorca	Hilmar	4	A	3	2	2-SL	15	14	2
2014-06-05	1	Mallorca	Hilmar	4	A	3	2	3-FI	15	10	1
2014-06-05	1	Mallorca	Hilmar	4	A	3	2	4-TU	0	0	0
2014-06-05	1	Mallorca	Hilmar	4	A	3	2	5-PL	4	21	1
2014-06-05	1	Mallorca	Hilmar	4	A	3	2	6-BT	0	0	0
2014-06-05	1	Mallorca	Hilmar	4	A	3	2	7-LB	0	0	0
2014-06-05	1	Mallorca	Hilmar	4	A	3	2	8-TF	15	4	2
2014-06-05	1	Mallorca	Hilmar	4	A	3	2	Barens	0	0	0
2014-06-05	1	Mallorca	Hilmar	4	A	3	3	1-ET	0	0	0
2014-06-05	1	Mallorca	Hilmar	4	A	3	3	2-SL	14	10	2
2014-06-05	1	Mallorca	Hilmar	4	A	3	3	3-FI	5	7	1
2014-06-05	1	Mallorca	Hilmar	4	A	3	3	4-TU	0	0	0
2014-06-05	1	Mallorca	Hilmar	4	A	3	3	5-PL	3	16	1
2014-06-05	1	Mallorca	Hilmar	4	A	3	3	6-BT	0	0	0
2014-06-05	1	Mallorca	Hilmar	4	A	3	3	7-LB	2	4	1
2014-06-05	1	Mallorca	Hilmar	4	A	3	3	8-TF	14	4	2
2014-06-05	1	Mallorca	Hilmar	4	A	3	3	Barens	0	0	0
2014-06-06	1	Mallorca	Hilmar	5	A	1	1	1-ET	17	11	2
2014-06-06	1	Mallorca	Hilmar	5	A	1	1	2-SL	10	10	3
2014-06-06	1	Mallorca	Hilmar	5	A	1	1	3-FI	2	9	1
2014-06-06	1	Mallorca	Hilmar	5	A	1	1	4-TU	0	0	0
2014-06-06	1	Mallorca	Hilmar	5	A	1	1	5-PL	0	0	0
2014-06-06	1	Mallorca	Hilmar	5	A	1	1	6-BT	0	0	0
2014-06-06	1	Mallorca	Hilmar	5	A	1	1	7-LB	0	0	0
2014-06-06	1	Mallorca	Hilmar	5	A	1	1	8-TF	2	4	1
2014-06-06	1	Mallorca	Hilmar	5	A	1	1	Barens	0	0	0
2014-06-06	1	Mallorca	Hilmar	5	A	1	2	1-ET	15	10	2
2014-06-06	1	Mallorca	Hilmar	5	A	1	2	2-SL	4	12	2
2014-06-06	1	Mallorca	Hilmar	5	A	1	2	3-FI	7	12	1
2014-06-06	1	Mallorca	Hilmar	5	A	1	2	4-TU	1	10	1
2014-06-06	1	Mallorca	Hilmar	5	A	1	2	5-PL	0	0	0
2014-06-06	1	Mallorca	Hilmar	5	A	1	2	6-BT	0	0	0
2014-06-06	1	Mallorca	Hilmar	5	A	1	2	7-LB	3	4	1
2014-06-06	1	Mallorca	Hilmar	5	A	1	2	8-TF	5	4	1
2014-06-06	1	Mallorca	Hilmar	5	A	1	2	Barens	0	0	0
2014-06-06	1	Mallorca	Hilmar	5	A	1	3	1-ET	7	12	2
2014-06-06	1	Mallorca	Hilmar	5	A	1	3	2-SL	7	11	2
2014-06-06	1	Mallorca	Hilmar	5	A	1	3	3-FI	0	0	0
2014-06-06	1	Mallorca	Hilmar	5	A	1	3	4-TU	0	0	0
2014-06-06	1	Mallorca	Hilmar	5	A	1	3	5-PL	0	0	0
2014-06-06	1	Mallorca	Hilmar	5	A	1	3	6-BT	4	5	1
2014-06-06	1	Mallorca	Hilmar	5	A	1	3	7-LB	2	4	1
2014-06-06	1	Mallorca	Hilmar	5	A	1	3	8-TF	12	4	1
2014-06-06	1	Mallorca	Hilmar	5	A	1	3	Barens	0	0	0
2014-06-06	1	Mallorca	Hilmar	5	A	2	1	1-ET	24	13	2
2014-06-06	1	Mallorca	Hilmar	5	A	2	1	2-SL	4	12	1
2014-06-06	1	Mallorca	Hilmar	5	A	2	1	3-FI	4	3	1
2014-06-06	1	Mallorca	Hilmar	5	A	2	1	4-TU	0	0	0
2014-06-06	1	Mallorca	Hilmar	5	A	2	1	5-PL	0	0	0
2014-06-06	1	Mallorca	Hilmar	5	A	2	1	6-BT	0	0	0
2014-06-06	1	Mallorca	Hilmar	5	A	2	1	7-LB	0	0	0
2014-06-06	1	Mallorca	Hilmar	5	A	2	1	8-TF	0	0	0
2014-06-06	1	Mallorca	Hilmar	5	A	2	1	Barens	0	0	0
2014-06-06	1	Mallorca	Hilmar	5	A	2	2	1-ET	16	13	2
2014-06-06	1	Mallorca	Hilmar	5	A	2	2	2-SL	5	12	2
2014-06-06	1	Mallorca	Hilmar	5	A	2	2	3-FI	4	9	1
2014-06-06	1	Mallorca	Hilmar	5	A	2	2	4-TU	0	0	0
2014-06-06	1	Mallorca	Hilmar	5	A	2	2	5-PL	0	0	0
2014-06-06	1	Mallorca	Hilmar	5	A	2	2	6-BT	0	0	0
2014-06-06	1	Mallorca	Hilmar	5	A	2	2	7-LB	0	0	0
2014-06-06	1	Mallorca	Hilmar	5	A	2	2	8-TF	5	4	1
2014-06-06	1	Mallorca	Hilmar	5	A	2	2	Barens	0	0	0
2014-06-06	1	Mallorca	Hilmar	5	A	2	3	1-ET	10	9	1
2014-06-06	1	Mallorca	Hilmar	5	A	2	3	2-SL	0	0	0
2014-06-06	1	Mallorca	Hilmar	5	A	2	3	3-FI	1	0	1
2014-06-06	1	Mallorca	Hilmar	5	A	2	3	4-TU	0	0	0
2014-06-06	1	Mallorca	Hilmar	5	A	2	3	5-PL	1	10	1
2014-06-06	1	Mallorca	Hilmar	5	A	2	3	6-BT	11	11	1
2014-06-06	1	Mallorca	Hilmar	5	A	2	3	7-LB	8	4	1
2014-06-06	1	Mallorca	Hilmar	5	A	2	3	8-TF	6	4	1
2014-06-06	1	Mallorca	Hilmar	5	A	2	3	Barens	0	0	0
2014-06-06	1	Mallorca	Hilmar	5	A	3	1	1-ET	23	14	2
2014-06-06	1	Mallorca	Hilmar	5	A	3	1	2-SL	5	12	2
2014-06-06	1	Mallorca	Hilmar	5	A	3	1	3-FI	1	8	1
2014-06-06	1	Mallorca	Hilmar	5	A	3	1	4-TU	0	0	0
2014-06-06	1	Mallorca	Hilmar	5	A	3	1	5-PL	0	0	0
2014-06-06	1	Mallorca	Hilmar	5	A	3	1	6-BT	0	0	0
2014-06-06	1	Mallorca	Hilmar	5	A	3	1	7-LB	1	4	1
2014-06-06	1	Mallorca	Hilmar	5	A	3	1	8-TF	2	4	1
2014-06-06	1	Mallorca	Hilmar	5	A	3	1	Barens	0	0	0
2014-06-06	1	Mallorca	Hilmar	5	A	3	2	1-ET	22	13	2
2014-06-06	1	Mallorca	Hilmar	5	A	3	2	2-SL	5	10	2
2014-06-06	1	Mallorca	Hilmar	5	A	3	2	3-FI	6	7	1
2014-06-06	1	Mallorca	Hilmar	5	A	3	2	4-TU	0	0	0
2014-06-06	1	Mallorca	Hilmar	5	A	3	2	5-PL	0	0	0
2014-06-06	1	Mallorca	Hilmar	5	A	3	2	6-BT	0	0	0
2014-06-06	1	Mallorca	Hilmar	5	A	3	2	7-LB	0	0	0
2014-06-06	1	Mallorca	Hilmar	5	A	3	2	8-TF	3	4	1
2014-06-06	1	Mallorca	Hilmar	5	A	3	2	Barens	0	0	0
2014-06-06	1	Mallorca	Hilmar	5	A	3	3	1-ET	22	13	2
2014-06-06	1	Mallorca	Hilmar	5	A	3	3	2-SL	3	12	1
2014-06-06	1	Mallorca	Hilmar	5	A	3	3	3-FI	7	15	1
2014-06-06	1	Mallorca	Hilmar	5	A	3	3	4-TU	0	0	0
2014-06-06	1	Mallorca	Hilmar	5	A	3	3	5-PL	0	0	0
2014-06-06	1	Mallorca	Hilmar	5	A	3	3	6-BT	0	0	0
2014-06-06	1	Mallorca	Hilmar	5	A	3	3	7-LB	1	5	1
2014-06-06	1	Mallorca	Hilmar	5	A	3	3	8-TF	0	0	0
2014-06-06	1	Mallorca	Hilmar	5	A	3	3	Barens	0	0	0
2014-06-06	1	Mallorca	Alvaro	5	B	4	1	1-ET	22	12	2
2014-06-06	1	Mallorca	Alvaro	5	B	4	1	2-SL	13	8	2
2014-06-06	1	Mallorca	Alvaro	5	B	4	1	3-FI	4	8.5	2
2014-06-06	1	Mallorca	Alvaro	5	B	4	1	4-TU	0	0	0
2014-06-06	1	Mallorca	Alvaro	5	B	4	1	5-PL	0	0	0
2014-06-06	1	Mallorca	Alvaro	5	B	4	1	6-BT	1	7	1
2014-06-06	1	Mallorca	Alvaro	5	B	4	1	7-LB	1	0	0
2014-06-06	1	Mallorca	Alvaro	5	B	4	1	8-TF	8	0	0
2014-06-06	1	Mallorca	Alvaro	5	B	4	1	Barens	0	0	0
2014-06-06	1	Mallorca	Alvaro	5	B	4	2	1-ET	23	14	2
2014-06-06	1	Mallorca	Alvaro	5	B	4	2	2-SL	3	6	2
2014-06-06	1	Mallorca	Alvaro	5	B	4	2	3-FI	3	8	1
2014-06-06	1	Mallorca	Alvaro	5	B	4	2	4-TU	0	0	0
2014-06-06	1	Mallorca	Alvaro	5	B	4	2	5-PL	0	0	0
2014-06-06	1	Mallorca	Alvaro	5	B	4	2	6-BT	0	0	0
2014-06-06	1	Mallorca	Alvaro	5	B	4	2	7-LB	0	0	0
2014-06-06	1	Mallorca	Alvaro	5	B	4	2	8-TF	12	4	2
2014-06-06	1	Mallorca	Alvaro	5	B	4	2	Barens	0	0	0
2014-06-06	1	Mallorca	Alvaro	5	B	4	3	1-ET	23	14	2
2014-06-06	1	Mallorca	Alvaro	5	B	4	3	2-SL	5	9	1
2014-06-06	1	Mallorca	Alvaro	5	B	4	3	3-FI	8	12	1
2014-06-06	1	Mallorca	Alvaro	5	B	4	3	4-TU	4	10	1
2014-06-06	1	Mallorca	Alvaro	5	B	4	3	5-PL	0	0	0
2014-06-06	1	Mallorca	Alvaro	5	B	4	3	6-BT	0	0	0
2014-06-06	1	Mallorca	Alvaro	5	B	4	3	7-LB	0	0	0
2014-06-06	1	Mallorca	Alvaro	5	B	4	3	8-TF	5	4	2
2014-06-06	1	Mallorca	Alvaro	5	B	4	3	Barens	0	0	0
2014-06-06	1	Mallorca	Alvaro	5	B	5	1	1-ET	19	11	2
2014-06-06	1	Mallorca	Alvaro	5	B	5	1	2-SL	2	10	2
2014-06-06	1	Mallorca	Alvaro	5	B	5	1	3-FI	11	12	1
2014-06-06	1	Mallorca	Alvaro	5	B	5	1	4-TU	0	0	0
2014-06-06	1	Mallorca	Alvaro	5	B	5	1	5-PL	1	7	1
2014-06-06	1	Mallorca	Alvaro	5	B	5	1	6-BT	0	0	0
2014-06-06	1	Mallorca	Alvaro	5	B	5	1	7-LB	2	0	0
2014-06-06	1	Mallorca	Alvaro	5	B	5	1	8-TF	3	4	2
2014-06-06	1	Mallorca	Alvaro	5	B	5	1	Barens	0	0	0
2014-06-06	1	Mallorca	Alvaro	5	B	5	2	1-ET	24	13	2
2014-06-06	1	Mallorca	Alvaro	5	B	5	2	2-SL	7	9	1
2014-06-06	1	Mallorca	Alvaro	5	B	5	2	3-FI	7	14	1
2014-06-06	1	Mallorca	Alvaro	5	B	5	2	4-TU	2	13	1
2014-06-06	1	Mallorca	Alvaro	5	B	5	2	5-PL	1	12	1
2014-06-06	1	Mallorca	Alvaro	5	B	5	2	6-BT	0	0	0
2014-06-06	1	Mallorca	Alvaro	5	B	5	2	7-LB	0	0	0
2014-06-06	1	Mallorca	Alvaro	5	B	5	2	8-TF	3	4	2
2014-06-06	1	Mallorca	Alvaro	5	B	5	2	Barens	0	0	0
2014-06-06	1	Mallorca	Alvaro	5	B	5	3	1-ET	15	12	2
2014-06-06	1	Mallorca	Alvaro	5	B	5	3	2-SL	11	11	2
2014-06-06	1	Mallorca	Alvaro	5	B	5	3	3-FI	9	13	1
2014-06-06	1	Mallorca	Alvaro	5	B	5	3	4-TU	0	0	0
2014-06-06	1	Mallorca	Alvaro	5	B	5	3	5-PL	0	0	0
2014-06-06	1	Mallorca	Alvaro	5	B	5	3	6-BT	2	11	1
2014-06-06	1	Mallorca	Alvaro	5	B	5	3	7-LB	1	0	0
2014-06-06	1	Mallorca	Alvaro	5	B	5	3	8-TF	6	4	2
2014-06-06	1	Mallorca	Alvaro	5	B	5	3	Barens	0	0	0
2014-06-06	1	Mallorca	Alvaro	5	B	6	1	1-ET	17	13	2
2014-06-06	1	Mallorca	Alvaro	5	B	6	1	2-SL	3	11	1
2014-06-06	1	Mallorca	Alvaro	5	B	6	1	3-FI	3	6	1
2014-06-06	1	Mallorca	Alvaro	5	B	6	1	4-TU	0	0	0
2014-06-06	1	Mallorca	Alvaro	5	B	6	1	5-PL	4	19	1
2014-06-06	1	Mallorca	Alvaro	5	B	6	1	6-BT	4	14	1
2014-06-06	1	Mallorca	Alvaro	5	B	6	1	7-LB	7	0	1
2014-06-06	1	Mallorca	Alvaro	5	B	6	1	8-TF	10	4	2
2014-06-06	1	Mallorca	Alvaro	5	B	6	1	Barens	0	0	0
2014-06-06	1	Mallorca	Alvaro	5	B	6	2	1-ET	16	14	2
2014-06-06	1	Mallorca	Alvaro	5	B	6	2	2-SL	0	0	0
2014-06-06	1	Mallorca	Alvaro	5	B	6	2	3-FI	12	12	1
2014-06-06	1	Mallorca	Alvaro	5	B	6	2	4-TU	0	0	0
2014-06-06	1	Mallorca	Alvaro	5	B	6	2	5-PL	1	6	1
2014-06-06	1	Mallorca	Alvaro	5	B	6	2	6-BT	0	0	0
2014-06-06	1	Mallorca	Alvaro	5	B	6	2	7-LB	0	0	0
2014-06-06	1	Mallorca	Alvaro	5	B	6	2	8-TF	4	4	2
2014-06-06	1	Mallorca	Alvaro	5	B	6	2	Barens	0	0	0
2014-06-06	1	Mallorca	Alvaro	5	B	6	3	1-ET	22	12	2
2014-06-06	1	Mallorca	Alvaro	5	B	6	3	2-SL	4	9	3
2014-06-06	1	Mallorca	Alvaro	5	B	6	3	3-FI	2	13	0
2014-06-06	1	Mallorca	Alvaro	5	B	6	3	4-TU	0	0	0
2014-06-06	1	Mallorca	Alvaro	5	B	6	3	5-PL	4	20	1
2014-06-06	1	Mallorca	Alvaro	5	B	6	3	6-BT	0	0	0
2014-06-06	1	Mallorca	Alvaro	5	B	6	3	7-LB	1	3	1
2014-06-06	1	Mallorca	Alvaro	5	B	6	3	8-TF	9	4	2
2014-06-06	1	Mallorca	Alvaro	5	B	6	3	Barens	0	0	0
2014-06-07	1	Mallorca	Hilmar	6	A	1	1	1-ET	15	11	2
2014-06-07	1	Mallorca	Hilmar	6	A	1	1	2-SL	4	14	2
2014-06-07	1	Mallorca	Hilmar	6	A	1	1	3-FI	4	12	1
2014-06-07	1	Mallorca	Hilmar	6	A	1	1	4-TU	0	0	0
2014-06-07	1	Mallorca	Hilmar	6	A	1	1	5-PL	0	0	0
2014-06-07	1	Mallorca	Hilmar	6	A	1	1	6-BT	0	0	0
2014-06-07	1	Mallorca	Hilmar	6	A	1	1	7-LB	6	4	1
2014-06-07	1	Mallorca	Hilmar	6	A	1	1	8-TF	2	4	1
2014-06-07	1	Mallorca	Hilmar	6	A	1	1	Barens	0	0	0
2014-06-07	1	Mallorca	Hilmar	6	A	1	2	1-ET	20	11	2
2014-06-07	1	Mallorca	Hilmar	6	A	1	2	2-SL	6	10	2
2014-06-07	1	Mallorca	Hilmar	6	A	1	2	3-FI	13	7	1
2014-06-07	1	Mallorca	Hilmar	6	A	1	2	4-TU	0	0	0
2014-06-07	1	Mallorca	Hilmar	6	A	1	2	5-PL	0	0	0
2014-06-07	1	Mallorca	Hilmar	6	A	1	2	6-BT	0	0	0
2014-06-07	1	Mallorca	Hilmar	6	A	1	2	7-LB	0	0	0
2014-06-07	1	Mallorca	Hilmar	6	A	1	2	8-TF	3	4	1
2014-06-07	1	Mallorca	Hilmar	6	A	1	2	Barens	0	0	0
2014-06-07	1	Mallorca	Hilmar	6	A	1	3	1-ET	10	9	2
2014-06-07	1	Mallorca	Hilmar	6	A	1	3	2-SL	5	8	2
2014-06-07	1	Mallorca	Hilmar	6	A	1	3	3-FI	8	9	1
2014-06-07	1	Mallorca	Hilmar	6	A	1	3	4-TU	0	0	0
2014-06-07	1	Mallorca	Hilmar	6	A	1	3	5-PL	0	0	0
2014-06-07	1	Mallorca	Hilmar	6	A	1	3	6-BT	1	6	1
2014-06-07	1	Mallorca	Hilmar	6	A	1	3	7-LB	10	6	2
2014-06-07	1	Mallorca	Hilmar	6	A	1	3	8-TF	2	4	1
2014-06-07	1	Mallorca	Hilmar	6	A	1	3	Barens	0	0	0
2014-06-07	1	Mallorca	Hilmar	6	A	2	1	1-ET	4	10	1
2014-06-07	1	Mallorca	Hilmar	6	A	2	1	2-SL	9	12	2
2014-06-07	1	Mallorca	Hilmar	6	A	2	1	3-FI	6	8	1
2014-06-07	1	Mallorca	Hilmar	6	A	2	1	4-TU	0	0	0
2014-06-07	1	Mallorca	Hilmar	6	A	2	1	5-PL	0	0	0
2014-06-07	1	Mallorca	Hilmar	6	A	2	1	6-BT	5	8	1
2014-06-07	1	Mallorca	Hilmar	6	A	2	1	7-LB	0	0	0
2014-06-07	1	Mallorca	Hilmar	6	A	2	1	8-TF	9	4	1
2014-06-07	1	Mallorca	Hilmar	6	A	2	1	Barens	0	0	0
2014-06-07	1	Mallorca	Hilmar	6	A	2	2	1-ET	17	14	2
2014-06-07	1	Mallorca	Hilmar	6	A	2	2	2-SL	4	11	2
2014-06-07	1	Mallorca	Hilmar	6	A	2	2	3-FI	4	6	1
2014-06-07	1	Mallorca	Hilmar	6	A	2	2	4-TU	0	0	0
2014-06-07	1	Mallorca	Hilmar	6	A	2	2	5-PL	0	0	0
2014-06-07	1	Mallorca	Hilmar	6	A	2	2	6-BT	0	0	0
2014-06-07	1	Mallorca	Hilmar	6	A	2	2	7-LB	2	5	1
2014-06-07	1	Mallorca	Hilmar	6	A	2	2	8-TF	5	4	1
2014-06-07	1	Mallorca	Hilmar	6	A	2	2	Barens	0	0	0
2014-06-07	1	Mallorca	Hilmar	6	A	2	3	1-ET	10	12	3
2014-06-07	1	Mallorca	Hilmar	6	A	2	3	2-SL	0	0	0
2014-06-07	1	Mallorca	Hilmar	6	A	2	3	3-FI	0	0	0
2014-06-07	1	Mallorca	Hilmar	6	A	2	3	4-TU	3	11	1
2014-06-07	1	Mallorca	Hilmar	6	A	2	3	5-PL	0	0	0
2014-06-07	1	Mallorca	Hilmar	6	A	2	3	6-BT	5	10	1
2014-06-07	1	Mallorca	Hilmar	6	A	2	3	7-LB	4	5	1
2014-06-07	1	Mallorca	Hilmar	6	A	2	3	8-TF	0	0	0
2014-06-07	1	Mallorca	Hilmar	6	A	2	3	Barens	0	0	0
2014-06-07	1	Mallorca	Hilmar	6	A	3	1	1-ET	0	0	0
2014-06-07	1	Mallorca	Hilmar	6	A	3	1	2-SL	2	9	1
2014-06-07	1	Mallorca	Hilmar	6	A	3	1	3-FI	0	0	0
2014-06-07	1	Mallorca	Hilmar	6	A	3	1	4-TU	10	9	1
2014-06-07	1	Mallorca	Hilmar	6	A	3	1	5-PL	0	0	0
2014-06-07	1	Mallorca	Hilmar	6	A	3	1	6-BT	14	8	1
2014-06-07	1	Mallorca	Hilmar	6	A	3	1	7-LB	12	6	1
2014-06-07	1	Mallorca	Hilmar	6	A	3	1	8-TF	4	4	1
2014-06-07	1	Mallorca	Hilmar	6	A	3	1	Barens	0	0	0
2014-06-07	1	Mallorca	Hilmar	6	A	3	2	1-ET	9	11	2
2014-06-07	1	Mallorca	Hilmar	6	A	3	2	2-SL	2	11	1
2014-06-07	1	Mallorca	Hilmar	6	A	3	2	3-FI	3	10	1
2014-06-07	1	Mallorca	Hilmar	6	A	3	2	4-TU	0	0	0
2014-06-07	1	Mallorca	Hilmar	6	A	3	2	5-PL	0	0	0
2014-06-07	1	Mallorca	Hilmar	6	A	3	2	6-BT	0	0	0
2014-06-07	1	Mallorca	Hilmar	6	A	3	2	7-LB	10	6	1
2014-06-07	1	Mallorca	Hilmar	6	A	3	2	8-TF	2	4	1
2014-06-07	1	Mallorca	Hilmar	6	A	3	2	Barens	3	0	0
2014-06-07	1	Mallorca	Hilmar	6	A	3	3	1-ET	12	11	2
2014-06-07	1	Mallorca	Hilmar	6	A	3	3	2-SL	3	9	2
2014-06-07	1	Mallorca	Hilmar	6	A	3	3	3-FI	1	5	1
2014-06-07	1	Mallorca	Hilmar	6	A	3	3	4-TU	0	0	0
2014-06-07	1	Mallorca	Hilmar	6	A	3	3	5-PL	0	0	0
2014-06-07	1	Mallorca	Hilmar	6	A	3	3	6-BT	1	9	1
2014-06-07	1	Mallorca	Hilmar	6	A	3	3	7-LB	10	6	1
2014-06-07	1	Mallorca	Hilmar	6	A	3	3	8-TF	2	4	1
2014-06-07	1	Mallorca	Hilmar	6	A	3	3	Barens	6	0	0
2014-06-07	1	Mallorca	Alvaro	6	B	4	1	1-ET	17	15	2
2014-06-07	1	Mallorca	Alvaro	6	B	4	1	2-SL	11	12	2
2014-06-07	1	Mallorca	Alvaro	6	B	4	1	3-FI	15	13	1
2014-06-07	1	Mallorca	Alvaro	6	B	4	1	4-TU	0	0	0
2014-06-07	1	Mallorca	Alvaro	6	B	4	1	5-PL	0	0	0
2014-06-07	1	Mallorca	Alvaro	6	B	4	1	6-BT	4	9	1
2014-06-07	1	Mallorca	Alvaro	6	B	4	1	7-LB	4	0	1
2014-06-07	1	Mallorca	Alvaro	6	B	4	1	8-TF	1	4	1
2014-06-07	1	Mallorca	Alvaro	6	B	4	1	Barens	0	0	0
2014-06-07	1	Mallorca	Alvaro	6	B	4	2	1-ET	12	14	2
2014-06-07	1	Mallorca	Alvaro	6	B	4	2	2-SL	9	13	3
2014-06-07	1	Mallorca	Alvaro	6	B	4	2	3-FI	18	11	1
2014-06-07	1	Mallorca	Alvaro	6	B	4	2	4-TU	0	0	0
2014-06-07	1	Mallorca	Alvaro	6	B	4	2	5-PL	0	0	0
2014-06-07	1	Mallorca	Alvaro	6	B	4	2	6-BT	8	10	1
2014-06-07	1	Mallorca	Alvaro	6	B	4	2	7-LB	5	3	1
2014-06-07	1	Mallorca	Alvaro	6	B	4	2	8-TF	3	4	1
2014-06-07	1	Mallorca	Alvaro	6	B	4	2	Barens	0	0	0
2014-06-07	1	Mallorca	Alvaro	6	B	4	3	1-ET	9	16	1
2014-06-07	1	Mallorca	Alvaro	6	B	4	3	2-SL	8	13	2
2014-06-07	1	Mallorca	Alvaro	6	B	4	3	3-FI	7	19	1
2014-06-07	1	Mallorca	Alvaro	6	B	4	3	4-TU	0	0	0
2014-06-07	1	Mallorca	Alvaro	6	B	4	3	5-PL	0	0	0
2014-06-07	1	Mallorca	Alvaro	6	B	4	3	6-BT	6	11	1
2014-06-07	1	Mallorca	Alvaro	6	B	4	3	7-LB	11	3	1
2014-06-07	1	Mallorca	Alvaro	6	B	4	3	8-TF	2	4	1
2014-06-07	1	Mallorca	Alvaro	6	B	4	3	Barens	0	0	0
2014-06-07	1	Mallorca	Alvaro	6	B	5	1	1-ET	4	8	1
2014-06-07	1	Mallorca	Alvaro	6	B	5	1	2-SL	14	12	1
2014-06-07	1	Mallorca	Alvaro	6	B	5	1	3-FI	22	11	1
2014-06-07	1	Mallorca	Alvaro	6	B	5	1	4-TU	0	0	0
2014-06-07	1	Mallorca	Alvaro	6	B	5	1	5-PL	0	0	0
2014-06-07	1	Mallorca	Alvaro	6	B	5	1	6-BT	4	9	1
2014-06-07	1	Mallorca	Alvaro	6	B	5	1	7-LB	0	0	0
2014-06-07	1	Mallorca	Alvaro	6	B	5	1	8-TF	12	4	2
2014-06-07	1	Mallorca	Alvaro	6	B	5	1	Barens	0	0	0
2014-06-07	1	Mallorca	Alvaro	6	B	5	2	1-ET	8	15	1
2014-06-07	1	Mallorca	Alvaro	6	B	5	2	2-SL	15	9	3
2014-06-07	1	Mallorca	Alvaro	6	B	5	2	3-FI	10	11	1
2014-06-07	1	Mallorca	Alvaro	6	B	5	2	4-TU	0	0	0
2014-06-07	1	Mallorca	Alvaro	6	B	5	2	5-PL	0	0	0
2014-06-07	1	Mallorca	Alvaro	6	B	5	2	6-BT	9	12	1
2014-06-07	1	Mallorca	Alvaro	6	B	5	2	7-LB	11	0	1
2014-06-07	1	Mallorca	Alvaro	6	B	5	2	8-TF	5	4	2
2014-06-07	1	Mallorca	Alvaro	6	B	5	2	Barens	0	0	0
2014-06-07	1	Mallorca	Alvaro	6	B	5	3	1-ET	9	11	2
2014-06-07	1	Mallorca	Alvaro	6	B	5	3	2-SL	10	9	2
2014-06-07	1	Mallorca	Alvaro	6	B	5	3	3-FI	11	9	1
2014-06-07	1	Mallorca	Alvaro	6	B	5	3	4-TU	0	0	0
2014-06-07	1	Mallorca	Alvaro	6	B	5	3	5-PL	0	0	0
2014-06-07	1	Mallorca	Alvaro	6	B	5	3	6-BT	11	7	1
2014-06-07	1	Mallorca	Alvaro	6	B	5	3	7-LB	0	0	0
2014-06-07	1	Mallorca	Alvaro	6	B	5	3	8-TF	10	4	5
2014-06-07	1	Mallorca	Alvaro	6	B	5	3	Barens	0	0	0
2014-06-07	1	Mallorca	Alvaro	6	B	6	1	1-ET	6	10	2
2014-06-07	1	Mallorca	Alvaro	6	B	6	1	2-SL	9	11	2
2014-06-07	1	Mallorca	Alvaro	6	B	6	1	3-FI	16	13	1
2014-06-07	1	Mallorca	Alvaro	6	B	6	1	4-TU	0	0	0
2014-06-07	1	Mallorca	Alvaro	6	B	6	1	5-PL	0	0	0
2014-06-07	1	Mallorca	Alvaro	6	B	6	1	6-BT	9	10	1
2014-06-07	1	Mallorca	Alvaro	6	B	6	1	7-LB	3	0	1
2014-06-07	1	Mallorca	Alvaro	6	B	6	1	8-TF	11	4	3
2014-06-07	1	Mallorca	Alvaro	6	B	6	1	Barens	0	0	0
2014-06-07	1	Mallorca	Alvaro	6	B	6	2	1-ET	9	14	2
2014-06-07	1	Mallorca	Alvaro	6	B	6	2	2-SL	7	9	1
2014-06-07	1	Mallorca	Alvaro	6	B	6	2	3-FI	18	12	1
2014-06-07	1	Mallorca	Alvaro	6	B	6	2	4-TU	0	0	0
2014-06-07	1	Mallorca	Alvaro	6	B	6	2	5-PL	0	0	0
2014-06-07	1	Mallorca	Alvaro	6	B	6	2	6-BT	10	12	1
2014-06-07	1	Mallorca	Alvaro	6	B	6	2	7-LB	0	0	0
2014-06-07	1	Mallorca	Alvaro	6	B	6	2	8-TF	4	4	1
2014-06-07	1	Mallorca	Alvaro	6	B	6	2	Barens	0	0	0
2014-06-07	1	Mallorca	Alvaro	6	B	6	3	1-ET	13	12	2
2014-06-07	1	Mallorca	Alvaro	6	B	6	3	2-SL	2	9	1
2014-06-07	1	Mallorca	Alvaro	6	B	6	3	3-FI	13	13	1
2014-06-07	1	Mallorca	Alvaro	6	B	6	3	4-TU	0	0	0
2014-06-07	1	Mallorca	Alvaro	6	B	6	3	5-PL	0	0	0
2014-06-07	1	Mallorca	Alvaro	6	B	6	3	6-BT	2	7	1
2014-06-07	1	Mallorca	Alvaro	6	B	6	3	7-LB	5	0	0
2014-06-07	1	Mallorca	Alvaro	6	B	6	3	8-TF	7	4	2
2014-06-07	1	Mallorca	Alvaro	6	B	6	3	Barens	0	0	0
2014-06-08	1	Mallorca	Hilmar	7	A	1	1	1-ET	0	0	0
2014-06-08	1	Mallorca	Hilmar	7	A	1	1	2-SL	16	14	2
2014-06-08	1	Mallorca	Hilmar	7	A	1	1	3-FI	0	0	0
2014-06-08	1	Mallorca	Hilmar	7	A	1	1	4-TU	0	0	0
2014-06-08	1	Mallorca	Hilmar	7	A	1	1	5-PL	0	0	0
2014-06-08	1	Mallorca	Hilmar	7	A	1	1	6-BT	0	0	0
2014-06-08	1	Mallorca	Hilmar	7	A	1	1	7-LB	6	4	1
2014-06-08	1	Mallorca	Hilmar	7	A	1	1	8-TF	13	4	2
2014-06-08	1	Mallorca	Hilmar	7	A	1	1	Barens	0	0	0
2014-06-08	1	Mallorca	Hilmar	7	A	1	2	1-ET	0	0	0
2014-06-08	1	Mallorca	Hilmar	7	A	1	2	2-SL	7	11	2
2014-06-08	1	Mallorca	Hilmar	7	A	1	2	3-FI	10	6	1
2014-06-08	1	Mallorca	Hilmar	7	A	1	2	4-TU	0	0	0
2014-06-08	1	Mallorca	Hilmar	7	A	1	2	5-PL	0	0	0
2014-06-08	1	Mallorca	Hilmar	7	A	1	2	6-BT	0	0	0
2014-06-08	1	Mallorca	Hilmar	7	A	1	2	7-LB	4	4	1
2014-06-08	1	Mallorca	Hilmar	7	A	1	2	8-TF	16	4	1
2014-06-08	1	Mallorca	Hilmar	7	A	1	2	Barens	0	0	0
2014-06-08	1	Mallorca	Hilmar	7	A	1	3	1-ET	4	14	2
2014-06-08	1	Mallorca	Hilmar	7	A	1	3	2-SL	5	14	2
2014-06-08	1	Mallorca	Hilmar	7	A	1	3	3-FI	13	6	1
2014-06-08	1	Mallorca	Hilmar	7	A	1	3	4-TU	0	0	0
2014-06-08	1	Mallorca	Hilmar	7	A	1	3	5-PL	0	0	0
2014-06-08	1	Mallorca	Hilmar	7	A	1	3	6-BT	1	9	1
2014-06-08	1	Mallorca	Hilmar	7	A	1	3	7-LB	6	4	1
2014-06-08	1	Mallorca	Hilmar	7	A	1	3	8-TF	11	4	1
2014-06-08	1	Mallorca	Hilmar	7	A	1	3	Barens	0	0	0
2014-06-08	1	Mallorca	Hilmar	7	A	2	1	1-ET	1	10	1
2014-06-08	1	Mallorca	Hilmar	7	A	2	1	2-SL	18	14	3
2014-06-08	1	Mallorca	Hilmar	7	A	2	1	3-FI	6	8	1
2014-06-08	1	Mallorca	Hilmar	7	A	2	1	4-TU	0	0	0
2014-06-08	1	Mallorca	Hilmar	7	A	2	1	5-PL	0	0	0
2014-06-08	1	Mallorca	Hilmar	7	A	2	1	6-BT	2	6	1
2014-06-08	1	Mallorca	Hilmar	7	A	2	1	7-LB	4	4	1
2014-06-08	1	Mallorca	Hilmar	7	A	2	1	8-TF	11	4	1
2014-06-08	1	Mallorca	Hilmar	7	A	2	1	Barens	0	0	0
2014-06-08	1	Mallorca	Hilmar	7	A	2	2	1-ET	3	14	2
2014-06-08	1	Mallorca	Hilmar	7	A	2	2	2-SL	17	16	2
2014-06-08	1	Mallorca	Hilmar	7	A	2	2	3-FI	0	0	0
2014-06-08	1	Mallorca	Hilmar	7	A	2	2	4-TU	0	0	0
2014-06-08	1	Mallorca	Hilmar	7	A	2	2	5-PL	0	0	0
2014-06-08	1	Mallorca	Hilmar	7	A	2	2	6-BT	0	0	0
2014-06-08	1	Mallorca	Hilmar	7	A	2	2	7-LB	2	4	1
2014-06-08	1	Mallorca	Hilmar	7	A	2	2	8-TF	9	4	1
2014-06-08	1	Mallorca	Hilmar	7	A	2	2	Barens	0	0	0
2014-06-08	1	Mallorca	Hilmar	7	A	2	3	1-ET	3	17	1
2014-06-08	1	Mallorca	Hilmar	7	A	2	3	2-SL	16	12	2
2014-06-08	1	Mallorca	Hilmar	7	A	2	3	3-FI	3	10	0
2014-06-08	1	Mallorca	Hilmar	7	A	2	3	4-TU	0	0	0
2014-06-08	1	Mallorca	Hilmar	7	A	2	3	5-PL	0	0	0
2014-06-08	1	Mallorca	Hilmar	7	A	2	3	6-BT	1	8	1
2014-06-08	1	Mallorca	Hilmar	7	A	2	3	7-LB	0	0	0
2014-06-08	1	Mallorca	Hilmar	7	A	2	3	8-TF	4	4	1
2014-06-08	1	Mallorca	Hilmar	7	A	2	3	Barens	0	0	0
2014-06-08	1	Mallorca	Hilmar	7	A	3	1	1-ET	5	14	2
2014-06-08	1	Mallorca	Hilmar	7	A	3	1	2-SL	10	11	2
2014-06-08	1	Mallorca	Hilmar	7	A	3	1	3-FI	4	6	1
2014-06-08	1	Mallorca	Hilmar	7	A	3	1	4-TU	0	0	0
2014-06-08	1	Mallorca	Hilmar	7	A	3	1	5-PL	0	0	0
2014-06-08	1	Mallorca	Hilmar	7	A	3	1	6-BT	0	0	0
2014-06-08	1	Mallorca	Hilmar	7	A	3	1	7-LB	4	4	1
2014-06-08	1	Mallorca	Hilmar	7	A	3	1	8-TF	10	4	1
2014-06-08	1	Mallorca	Hilmar	7	A	3	1	Barens	0	0	0
2014-06-08	1	Mallorca	Hilmar	7	A	3	2	1-ET	6	11	2
2014-06-08	1	Mallorca	Hilmar	7	A	3	2	2-SL	12	11	2
2014-06-08	1	Mallorca	Hilmar	7	A	3	2	3-FI	4	6	1
2014-06-08	1	Mallorca	Hilmar	7	A	3	2	4-TU	0	0	0
2014-06-08	1	Mallorca	Hilmar	7	A	3	2	5-PL	0	0	0
2014-06-08	1	Mallorca	Hilmar	7	A	3	2	6-BT	0	0	0
2014-06-08	1	Mallorca	Hilmar	7	A	3	2	7-LB	3	4	1
2014-06-08	1	Mallorca	Hilmar	7	A	3	2	8-TF	4	4	1
2014-06-08	1	Mallorca	Hilmar	7	A	3	2	Barens	0	0	0
2014-06-08	1	Mallorca	Hilmar	7	A	3	3	1-ET	2	7	1
2014-06-08	1	Mallorca	Hilmar	7	A	3	3	2-SL	5	10	2
2014-06-08	1	Mallorca	Hilmar	7	A	3	3	3-FI	12	5	1
2014-06-08	1	Mallorca	Hilmar	7	A	3	3	4-TU	0	0	0
2014-06-08	1	Mallorca	Hilmar	7	A	3	3	5-PL	0	0	0
2014-06-08	1	Mallorca	Hilmar	7	A	3	3	6-BT	2	6	1
2014-06-08	1	Mallorca	Hilmar	7	A	3	3	7-LB	2	4	1
2014-06-08	1	Mallorca	Hilmar	7	A	3	3	8-TF	20	4	1
2014-06-08	1	Mallorca	Hilmar	7	A	3	3	Barens	0	0	0
2014-06-08	1	Mallorca	Alvaro	7	B	4	1	1-ET	2	16	1
2014-06-08	1	Mallorca	Alvaro	7	B	4	1	2-SL	9	16	2
2014-06-08	1	Mallorca	Alvaro	7	B	4	1	3-FI	16	8	1
2014-06-08	1	Mallorca	Alvaro	7	B	4	1	4-TU	0	0	0
2014-06-08	1	Mallorca	Alvaro	7	B	4	1	5-PL	0	0	0
2014-06-08	1	Mallorca	Alvaro	7	B	4	1	6-BT	0	0	0
2014-06-08	1	Mallorca	Alvaro	7	B	4	1	7-LB	7	3	1
2014-06-08	1	Mallorca	Alvaro	7	B	4	1	8-TF	20	4	2
2014-06-08	1	Mallorca	Alvaro	7	B	4	1	Barens	0	0	0
2014-06-08	1	Mallorca	Alvaro	7	B	4	2	1-ET	0	0	0
2014-06-08	1	Mallorca	Alvaro	7	B	4	2	2-SL	10	0	1
2014-06-08	1	Mallorca	Alvaro	7	B	4	2	3-FI	1	10	1
2014-06-08	1	Mallorca	Alvaro	7	B	4	2	4-TU	0	0	0
2014-06-08	1	Mallorca	Alvaro	7	B	4	2	5-PL	8	0	1
2014-06-08	1	Mallorca	Alvaro	7	B	4	2	6-BT	0	0	0
2014-06-08	1	Mallorca	Alvaro	7	B	4	2	7-LB	9	3	1
2014-06-08	1	Mallorca	Alvaro	7	B	4	2	8-TF	14	4	4
2014-06-08	1	Mallorca	Alvaro	7	B	4	2	Barens	0	0	0
2014-06-08	1	Mallorca	Alvaro	7	B	4	3	1-ET	6	8	2
2014-06-08	1	Mallorca	Alvaro	7	B	4	3	2-SL	9	14	2
2014-06-08	1	Mallorca	Alvaro	7	B	4	3	3-FI	13	9	1
2014-06-08	1	Mallorca	Alvaro	7	B	4	3	4-TU	4	10	1
2014-06-08	1	Mallorca	Alvaro	7	B	4	3	5-PL	0	0	0
2014-06-08	1	Mallorca	Alvaro	7	B	4	3	6-BT	0	0	0
2014-06-08	1	Mallorca	Alvaro	7	B	4	3	7-LB	4	0	2
2014-06-08	1	Mallorca	Alvaro	7	B	4	3	8-TF	18	4	3
2014-06-08	1	Mallorca	Alvaro	7	B	4	3	Barens	0	0	0
2014-06-08	1	Mallorca	Alvaro	7	B	5	1	1-ET	2	8	1
2014-06-08	1	Mallorca	Alvaro	7	B	5	1	2-SL	9	11	2
2014-06-08	1	Mallorca	Alvaro	7	B	5	1	3-FI	13	8	1
2014-06-08	1	Mallorca	Alvaro	7	B	5	1	4-TU	0	0	0
2014-06-08	1	Mallorca	Alvaro	7	B	5	1	5-PL	0	0	0
2014-06-08	1	Mallorca	Alvaro	7	B	5	1	6-BT	1	11	1
2014-06-08	1	Mallorca	Alvaro	7	B	5	1	7-LB	4	0	1
2014-06-08	1	Mallorca	Alvaro	7	B	5	1	8-TF	19	4	2
2014-06-08	1	Mallorca	Alvaro	7	B	5	1	Barens	0	0	0
2014-06-08	1	Mallorca	Alvaro	7	B	5	2	1-ET	5	8	2
2014-06-08	1	Mallorca	Alvaro	7	B	5	2	2-SL	18	13	2
2014-06-08	1	Mallorca	Alvaro	7	B	5	2	3-FI	13	10	1
2014-06-08	1	Mallorca	Alvaro	7	B	5	2	4-TU	3	10	1
2014-06-08	1	Mallorca	Alvaro	7	B	5	2	5-PL	0	0	0
2014-06-08	1	Mallorca	Alvaro	7	B	5	2	6-BT	2	7	1
2014-06-08	1	Mallorca	Alvaro	7	B	5	2	7-LB	4	0	1
2014-06-08	1	Mallorca	Alvaro	7	B	5	2	8-TF	21	4	4
2014-06-08	1	Mallorca	Alvaro	7	B	5	2	Barens	0	0	0
2014-06-08	1	Mallorca	Alvaro	7	B	5	3	1-ET	2	7	1
2014-06-08	1	Mallorca	Alvaro	7	B	5	3	2-SL	23	9	2
2014-06-08	1	Mallorca	Alvaro	7	B	5	3	3-FI	8	8	1
2014-06-08	1	Mallorca	Alvaro	7	B	5	3	4-TU	0	0	0
2014-06-08	1	Mallorca	Alvaro	7	B	5	3	5-PL	0	0	0
2014-06-08	1	Mallorca	Alvaro	7	B	5	3	6-BT	2	12	1
2014-06-08	1	Mallorca	Alvaro	7	B	5	3	7-LB	4	0	1
2014-06-08	1	Mallorca	Alvaro	7	B	5	3	8-TF	18	4	3
2014-06-08	1	Mallorca	Alvaro	7	B	5	3	Barens	0	0	0
2014-06-08	1	Mallorca	Alvaro	7	B	6	1	1-ET	1	5	1
2014-06-08	1	Mallorca	Alvaro	7	B	6	1	2-SL	1	7	2
2014-06-08	1	Mallorca	Alvaro	7	B	6	1	3-FI	0	0	0
2014-06-08	1	Mallorca	Alvaro	7	B	6	1	4-TU	3	10	1
2014-06-08	1	Mallorca	Alvaro	7	B	6	1	5-PL	0	0	0
2014-06-08	1	Mallorca	Alvaro	7	B	6	1	6-BT	15	9	0
2014-06-08	1	Mallorca	Alvaro	7	B	6	1	7-LB	14	0	1
2014-06-08	1	Mallorca	Alvaro	7	B	6	1	8-TF	15	4	2
2014-06-08	1	Mallorca	Alvaro	7	B	6	1	Barens	0	0	0
2014-06-08	1	Mallorca	Alvaro	7	B	6	2	1-ET	3	7	1
2014-06-08	1	Mallorca	Alvaro	7	B	6	2	2-SL	18	10	2
2014-06-08	1	Mallorca	Alvaro	7	B	6	2	3-FI	14	10	1
2014-06-08	1	Mallorca	Alvaro	7	B	6	2	4-TU	2	11	1
2014-06-08	1	Mallorca	Alvaro	7	B	6	2	5-PL	3	11	1
2014-06-08	1	Mallorca	Alvaro	7	B	6	2	6-BT	0	0	0
2014-06-08	1	Mallorca	Alvaro	7	B	6	2	7-LB	6	0	1
2014-06-08	1	Mallorca	Alvaro	7	B	6	2	8-TF	20	4	3
2014-06-08	1	Mallorca	Alvaro	7	B	6	2	Barens	0	0	0
2014-06-08	1	Mallorca	Alvaro	7	B	6	3	1-ET	4	10	1
2014-06-08	1	Mallorca	Alvaro	7	B	6	3	2-SL	17	8	2
2014-06-08	1	Mallorca	Alvaro	7	B	6	3	3-FI	15	10	1
2014-06-08	1	Mallorca	Alvaro	7	B	6	3	4-TU	0	0	0
2014-06-08	1	Mallorca	Alvaro	7	B	6	3	5-PL	2	8	1
2014-06-08	1	Mallorca	Alvaro	7	B	6	3	6-BT	0	0	0
2014-06-08	1	Mallorca	Alvaro	7	B	6	3	7-LB	0	0	0
2014-06-08	1	Mallorca	Alvaro	7	B	6	3	8-TF	18	4	3
2014-06-08	1	Mallorca	Alvaro	7	B	6	3	Barens	0	0	0
2014-06-09	1	Mallorca	Hilmar	8	A	1	1	1-ET	10	15	1
2014-06-09	1	Mallorca	Hilmar	8	A	1	1	2-SL	7	13	2
2014-06-09	1	Mallorca	Hilmar	8	A	1	1	3-FI	8	10	1
2014-06-09	1	Mallorca	Hilmar	8	A	1	1	4-TU	0	0	0
2014-06-09	1	Mallorca	Hilmar	8	A	1	1	5-PL	2	8	1
2014-06-09	1	Mallorca	Hilmar	8	A	1	1	6-BT	0	0	0
2014-06-09	1	Mallorca	Hilmar	8	A	1	1	7-LB	2	4	1
2014-06-09	1	Mallorca	Hilmar	8	A	1	1	8-TF	7	4	1
2014-06-09	1	Mallorca	Hilmar	8	A	1	1	Barens	0	0	0
2014-06-09	1	Mallorca	Hilmar	8	A	1	2	1-ET	16	13	1
2014-06-09	1	Mallorca	Hilmar	8	A	1	2	2-SL	5	11	2
2014-06-09	1	Mallorca	Hilmar	8	A	1	2	3-FI	4	8	1
2014-06-09	1	Mallorca	Hilmar	8	A	1	2	4-TU	0	0	0
2014-06-09	1	Mallorca	Hilmar	8	A	1	2	5-PL	0	0	0
2014-06-09	1	Mallorca	Hilmar	8	A	1	2	6-BT	4	6	7
2014-06-09	1	Mallorca	Hilmar	8	A	1	2	7-LB	0	0	0
2014-06-09	1	Mallorca	Hilmar	8	A	1	2	8-TF	0	0	0
2014-06-09	1	Mallorca	Hilmar	8	A	1	2	Barens	1	0	0
2014-06-09	1	Mallorca	Hilmar	8	A	1	3	1-ET	17	13	3
2014-06-09	1	Mallorca	Hilmar	8	A	1	3	2-SL	7	13	2
2014-06-09	1	Mallorca	Hilmar	8	A	1	3	3-FI	0	0	0
2014-06-09	1	Mallorca	Hilmar	8	A	1	3	4-TU	0	0	0
2014-06-09	1	Mallorca	Hilmar	8	A	1	3	5-PL	0	0	0
2014-06-09	1	Mallorca	Hilmar	8	A	1	3	6-BT	0	0	0
2014-06-09	1	Mallorca	Hilmar	8	A	1	3	7-LB	0	0	0
2014-06-09	1	Mallorca	Hilmar	8	A	1	3	8-TF	0	0	0
2014-06-09	1	Mallorca	Hilmar	8	A	1	3	Barens	4	0	0
2014-06-09	1	Mallorca	Hilmar	8	A	2	1	1-ET	25	13	2
2014-06-09	1	Mallorca	Hilmar	8	A	2	1	2-SL	2	11	2
2014-06-09	1	Mallorca	Hilmar	8	A	2	1	3-FI	1	14	1
2014-06-09	1	Mallorca	Hilmar	8	A	2	1	4-TU	0	0	0
2014-06-09	1	Mallorca	Hilmar	8	A	2	1	5-PL	0	0	0
2014-06-09	1	Mallorca	Hilmar	8	A	2	1	6-BT	0	0	0
2014-06-09	1	Mallorca	Hilmar	8	A	2	1	7-LB	0	0	0
2014-06-09	1	Mallorca	Hilmar	8	A	2	1	8-TF	0	0	0
2014-06-09	1	Mallorca	Hilmar	8	A	2	1	Barens	0	0	0
2014-06-09	1	Mallorca	Hilmar	8	A	2	2	1-ET	8	11	1
2014-06-09	1	Mallorca	Hilmar	8	A	2	2	2-SL	2	9	2
2014-06-09	1	Mallorca	Hilmar	8	A	2	2	3-FI	4	13	1
2014-06-09	1	Mallorca	Hilmar	8	A	2	2	4-TU	0	0	0
2014-06-09	1	Mallorca	Hilmar	8	A	2	2	5-PL	0	0	0
2014-06-09	1	Mallorca	Hilmar	8	A	2	2	6-BT	0	0	0
2014-06-09	1	Mallorca	Hilmar	8	A	2	2	7-LB	0	0	0
2014-06-09	1	Mallorca	Hilmar	8	A	2	2	8-TF	13	4	1
2014-06-09	1	Mallorca	Hilmar	8	A	2	2	Barens	0	0	0
2014-06-09	1	Mallorca	Hilmar	8	A	2	3	1-ET	13	13	2
2014-06-09	1	Mallorca	Hilmar	8	A	2	3	2-SL	5	9	1
2014-06-09	1	Mallorca	Hilmar	8	A	2	3	3-FI	4	10	1
2014-06-09	1	Mallorca	Hilmar	8	A	2	3	4-TU	0	0	0
2014-06-09	1	Mallorca	Hilmar	8	A	2	3	5-PL	1	9	1
2014-06-09	1	Mallorca	Hilmar	8	A	2	3	6-BT	4	6	1
2014-06-09	1	Mallorca	Hilmar	8	A	2	3	7-LB	1	4	1
2014-06-09	1	Mallorca	Hilmar	8	A	2	3	8-TF	5	4	1
2014-06-09	1	Mallorca	Hilmar	8	A	2	3	Barens	0	0	0
2014-06-09	1	Mallorca	Hilmar	8	A	3	1	1-ET	13	13	2
2014-06-09	1	Mallorca	Hilmar	8	A	3	1	2-SL	3	11	2
2014-06-09	1	Mallorca	Hilmar	8	A	3	1	3-FI	0	0	0
2014-06-09	1	Mallorca	Hilmar	8	A	3	1	4-TU	0	0	0
2014-06-09	1	Mallorca	Hilmar	8	A	3	1	5-PL	0	0	0
2014-06-09	1	Mallorca	Hilmar	8	A	3	1	6-BT	5	11	1
2014-06-09	1	Mallorca	Hilmar	8	A	3	1	7-LB	0	0	0
2014-06-09	1	Mallorca	Hilmar	8	A	3	1	8-TF	2	4	1
2014-06-09	1	Mallorca	Hilmar	8	A	3	1	Barens	0	0	0
2014-06-09	1	Mallorca	Hilmar	8	A	3	2	1-ET	12	14	1
2014-06-09	1	Mallorca	Hilmar	8	A	3	2	2-SL	4	12	2
2014-06-09	1	Mallorca	Hilmar	8	A	3	2	3-FI	0	0	0
2014-06-09	1	Mallorca	Hilmar	8	A	3	2	4-TU	0	0	0
2014-06-09	1	Mallorca	Hilmar	8	A	3	2	5-PL	1	10	1
2014-06-09	1	Mallorca	Hilmar	8	A	3	2	6-BT	7	10	1
2014-06-09	1	Mallorca	Hilmar	8	A	3	2	7-LB	1	4	1
2014-06-09	1	Mallorca	Hilmar	8	A	3	2	8-TF	4	4	1
2014-06-09	1	Mallorca	Hilmar	8	A	3	2	Barens	0	0	0
2014-06-09	1	Mallorca	Hilmar	8	A	3	3	1-ET	22	11	1
2014-06-09	1	Mallorca	Hilmar	8	A	3	3	2-SL	3	7	1
2014-06-09	1	Mallorca	Hilmar	8	A	3	3	3-FI	0	0	0
2014-06-09	1	Mallorca	Hilmar	8	A	3	3	4-TU	0	0	0
2014-06-09	1	Mallorca	Hilmar	8	A	3	3	5-PL	0	0	0
2014-06-09	1	Mallorca	Hilmar	8	A	3	3	6-BT	4	10	1
2014-06-09	1	Mallorca	Hilmar	8	A	3	3	7-LB	0	0	0
2014-06-09	1	Mallorca	Hilmar	8	A	3	3	8-TF	2	4	1
2014-06-09	1	Mallorca	Hilmar	8	A	3	3	Barens	0	0	0
2014-06-09	1	Mallorca	Hilmar	8	B	4	1	1-ET	15	18	3
2014-06-09	1	Mallorca	Hilmar	8	B	4	1	2-SL	6	12	3
2014-06-09	1	Mallorca	Hilmar	8	B	4	1	3-FI	17	9	3
2014-06-09	1	Mallorca	Hilmar	8	B	4	1	4-TU	0	0	0
2014-06-09	1	Mallorca	Hilmar	8	B	4	1	5-PL	0	0	0
2014-06-09	1	Mallorca	Hilmar	8	B	4	1	6-BT	0	0	0
2014-06-09	1	Mallorca	Hilmar	8	B	4	1	7-LB	6	0	1
2014-06-09	1	Mallorca	Hilmar	8	B	4	1	8-TF	9	4	2
2014-06-09	1	Mallorca	Hilmar	8	B	4	1	Barens	0	0	0
2014-06-09	1	Mallorca	Hilmar	8	B	4	2	1-ET	13	11	2
2014-06-09	1	Mallorca	Hilmar	8	B	4	2	2-SL	12	9	1
2014-06-09	1	Mallorca	Hilmar	8	B	4	2	3-FI	7	13	2
2014-06-09	1	Mallorca	Hilmar	8	B	4	2	4-TU	4	8	1
2014-06-09	1	Mallorca	Hilmar	8	B	4	2	5-PL	0	0	0
2014-06-09	1	Mallorca	Hilmar	8	B	4	2	6-BT	0	0	0
2014-06-09	1	Mallorca	Hilmar	8	B	4	2	7-LB	7	0	1
2014-06-09	1	Mallorca	Hilmar	8	B	4	2	8-TF	25	4	3
2014-06-09	1	Mallorca	Hilmar	8	B	4	2	Barens	0	0	0
2014-06-09	1	Mallorca	Hilmar	8	B	4	3	1-ET	10	15	1
2014-06-09	1	Mallorca	Hilmar	8	B	4	3	2-SL	11	11	3
2014-06-09	1	Mallorca	Hilmar	8	B	4	3	3-FI	6	8	1
2014-06-09	1	Mallorca	Hilmar	8	B	4	3	4-TU	4	8	1
2014-06-09	1	Mallorca	Hilmar	8	B	4	3	5-PL	0	0	0
2014-06-09	1	Mallorca	Hilmar	8	B	4	3	6-BT	0	0	0
2014-06-09	1	Mallorca	Hilmar	8	B	4	3	7-LB	4	0	1
2014-06-09	1	Mallorca	Hilmar	8	B	4	3	8-TF	21	4	4
2014-06-09	1	Mallorca	Hilmar	8	B	5	3	Barens	0	0	0
2014-06-09	1	Mallorca	Hilmar	8	B	5	1	1-ET	6	8	1
2014-06-09	1	Mallorca	Hilmar	8	B	5	1	2-SL	10	11	2
2014-06-09	1	Mallorca	Hilmar	8	B	5	1	3-FI	0	0	0
2014-06-09	1	Mallorca	Hilmar	8	B	5	1	4-TU	11	8	1
2014-06-09	1	Mallorca	Hilmar	8	B	5	1	5-PL	0	0	0
2014-06-09	1	Mallorca	Hilmar	8	B	5	1	6-BT	14	13	1
2014-06-09	1	Mallorca	Hilmar	8	B	5	1	7-LB	5	0	1
2014-06-09	1	Mallorca	Hilmar	8	B	5	1	8-TF	8	4	2
2014-06-09	1	Mallorca	Hilmar	8	B	5	1	Barens	0	0	0
2014-06-09	1	Mallorca	Hilmar	8	B	5	2	1-ET	7	9	2
2014-06-09	1	Mallorca	Hilmar	8	B	5	2	2-SL	5	10	1
2014-06-09	1	Mallorca	Hilmar	8	B	5	2	3-FI	0	0	0
2014-06-09	1	Mallorca	Hilmar	8	B	5	2	4-TU	3	9	1
2014-06-09	1	Mallorca	Hilmar	8	B	5	2	5-PL	0	0	0
2014-06-09	1	Mallorca	Hilmar	8	B	5	2	6-BT	0	0	0
2014-06-09	1	Mallorca	Hilmar	8	B	5	2	7-LB	3	0	1
2014-06-09	1	Mallorca	Hilmar	8	B	5	2	8-TF	21	4	4
2014-06-09	1	Mallorca	Hilmar	8	B	5	2	Barens	0	0	0
2014-06-09	1	Mallorca	Hilmar	8	B	5	3	1-ET	0	0	0
2014-06-09	1	Mallorca	Hilmar	8	B	5	3	2-SL	2	11	1
2014-06-09	1	Mallorca	Hilmar	8	B	5	3	3-FI	0	0	0
2014-06-09	1	Mallorca	Hilmar	8	B	5	3	4-TU	8	9	1
2014-06-09	1	Mallorca	Hilmar	8	B	5	3	5-PL	0	0	0
2014-06-09	1	Mallorca	Hilmar	8	B	5	3	6-BT	11	9	1
2014-06-09	1	Mallorca	Hilmar	8	B	5	3	7-LB	6	0	1
2014-06-09	1	Mallorca	Hilmar	8	B	5	3	8-TF	10	4	3
2014-06-09	1	Mallorca	Hilmar	8	B	5	3	Barens	0	0	0
2014-06-09	1	Mallorca	Hilmar	8	B	6	1	1-ET	8	10	1
2014-06-09	1	Mallorca	Hilmar	8	B	6	1	2-SL	6	11	2
2014-06-09	1	Mallorca	Hilmar	8	B	6	1	3-FI	9	13	1
2014-06-09	1	Mallorca	Hilmar	8	B	6	1	4-TU	1	7	1
2014-06-09	1	Mallorca	Hilmar	8	B	6	1	5-PL	0	0	0
2014-06-09	1	Mallorca	Hilmar	8	B	6	1	6-BT	11	13	1
2014-06-09	1	Mallorca	Hilmar	8	B	6	1	7-LB	3	0	1
2014-06-09	1	Mallorca	Hilmar	8	B	6	1	8-TF	12	4	2
2014-06-09	1	Mallorca	Hilmar	8	B	6	1	Barens	0	0	0
2014-06-09	1	Mallorca	Hilmar	8	B	6	2	1-ET	4	8	1
2014-06-09	1	Mallorca	Hilmar	8	B	6	2	2-SL	9	10	2
2014-06-09	1	Mallorca	Hilmar	8	B	6	2	3-FI	8	9	2
2014-06-09	1	Mallorca	Hilmar	8	B	6	2	4-TU	0	0	0
2014-06-09	1	Mallorca	Hilmar	8	B	6	2	5-PL	0	0	0
2014-06-09	1	Mallorca	Hilmar	8	B	6	2	6-BT	11	8	1
2014-06-09	1	Mallorca	Hilmar	8	B	6	2	7-LB	5	0	1
2014-06-09	1	Mallorca	Hilmar	8	B	6	2	8-TF	13	4	3
2014-06-09	1	Mallorca	Hilmar	8	B	6	2	Barens	0	0	0
2014-06-09	1	Mallorca	Hilmar	8	B	6	3	1-ET	8	16	2
2014-06-09	1	Mallorca	Hilmar	8	B	6	3	2-SL	17	11	2
2014-06-09	1	Mallorca	Hilmar	8	B	6	3	3-FI	5	9	1
2014-06-09	1	Mallorca	Hilmar	8	B	6	3	4-TU	0	0	0
2014-06-09	1	Mallorca	Hilmar	8	B	6	3	5-PL	0	0	0
2014-06-09	1	Mallorca	Hilmar	8	B	6	3	6-BT	2	7	1
2014-06-09	1	Mallorca	Hilmar	8	B	6	3	7-LB	9	0	1
2014-06-09	1	Mallorca	Hilmar	8	B	6	3	8-TF	3	4	2
2014-06-09	1	Mallorca	Hilmar	8	B	6	3	Barens	6	0	0
2014-06-24	2	Menorca	Johnson	9	B	4	1	1-ET	0	0	0
2014-06-24	2	Menorca	Johnson	9	B	4	1	2-SL	0	0	0
2014-06-24	2	Menorca	Johnson	9	B	4	1	3-FI	0	0	0
2014-06-24	2	Menorca	Johnson	9	B	4	1	4-TU	0	0	0
2014-06-24	2	Menorca	Johnson	9	B	4	1	5-PL	0	0	0
2014-06-24	2	Menorca	Johnson	9	B	4	1	6-BT	0	0	0
2014-06-24	2	Menorca	Johnson	9	B	4	1	7-LB	20	3	1
2014-06-24	2	Menorca	Johnson	9	B	4	1	8-TF	25	2	2
2014-06-24	2	Menorca	Johnson	9	B	4	1	Barens	0	0	0
2014-06-24	2	Menorca	Johnson	9	B	4	2	1-ET	0	0	0
2014-06-24	2	Menorca	Johnson	9	B	4	2	2-SL	0	0	0
2014-06-24	2	Menorca	Johnson	9	B	4	2	3-FI	0	0	0
2014-06-24	2	Menorca	Johnson	9	B	4	2	4-TU	0	0	0
2014-06-24	2	Menorca	Johnson	9	B	4	2	5-PL	0	0	0
2014-06-24	2	Menorca	Johnson	9	B	4	2	6-BT	0	0	0
2014-06-24	2	Menorca	Johnson	9	B	4	2	7-LB	25	3	1
2014-06-24	2	Menorca	Johnson	9	B	4	2	8-TF	25	1	2
2014-06-24	2	Menorca	Johnson	9	B	4	2	Barens	0	0	0
2014-06-24	2	Menorca	Johnson	9	B	4	3	1-ET	0	0	0
2014-06-24	2	Menorca	Johnson	9	B	4	3	2-SL	0	0	0
2014-06-24	2	Menorca	Johnson	9	B	4	3	3-FI	0	0	0
2014-06-24	2	Menorca	Johnson	9	B	4	3	4-TU	0	0	0
2014-06-24	2	Menorca	Johnson	9	B	4	3	5-PL	0	0	0
2014-06-24	2	Menorca	Johnson	9	B	4	3	6-BT	5	9	1
2014-06-24	2	Menorca	Johnson	9	B	4	3	7-LB	19	4	1
2014-06-24	2	Menorca	Johnson	9	B	4	3	8-TF	25	1	3
2014-06-24	2	Menorca	Johnson	9	B	4	3	Barens	0	0	0
2014-06-24	2	Menorca	Johnson	9	B	5	1	1-ET	0	0	0
2014-06-24	2	Menorca	Johnson	9	B	5	1	2-SL	3	11	2
2014-06-24	2	Menorca	Johnson	9	B	5	1	3-FI	0	0	0
2014-06-24	2	Menorca	Johnson	9	B	5	1	4-TU	0	0	0
2014-06-24	2	Menorca	Johnson	9	B	5	1	5-PL	0	0	0
2014-06-24	2	Menorca	Johnson	9	B	5	1	6-BT	25	8	2
2014-06-24	2	Menorca	Johnson	9	B	5	1	7-LB	8	3	1
2014-06-24	2	Menorca	Johnson	9	B	5	1	8-TF	0	0	0
2014-06-24	2	Menorca	Johnson	9	B	5	1	Barens	0	0	0
2014-06-24	2	Menorca	Johnson	9	B	5	2	1-ET	0	0	0
2014-06-24	2	Menorca	Johnson	9	B	5	2	2-SL	0	0	0
2014-06-24	2	Menorca	Johnson	9	B	5	2	3-FI	3	11	1
2014-06-24	2	Menorca	Johnson	9	B	5	2	4-TU	0	0	0
2014-06-24	2	Menorca	Johnson	9	B	5	2	5-PL	0	0	0
2014-06-24	2	Menorca	Johnson	9	B	5	2	6-BT	8	10	2
2014-06-24	2	Menorca	Johnson	9	B	5	2	7-LB	16	3	1
2014-06-24	2	Menorca	Johnson	9	B	5	2	8-TF	3	1	2
2014-06-24	2	Menorca	Johnson	9	B	5	2	Barens	0	0	0
2014-06-24	2	Menorca	Johnson	9	B	5	3	1-ET	0	0	0
2014-06-24	2	Menorca	Johnson	9	B	5	3	2-SL	0	0	0
2014-06-24	2	Menorca	Johnson	9	B	5	3	3-FI	25	12	1
2014-06-24	2	Menorca	Johnson	9	B	5	3	4-TU	0	0	0
2014-06-24	2	Menorca	Johnson	9	B	5	3	5-PL	0	0	0
2014-06-24	2	Menorca	Johnson	9	B	5	3	6-BT	2	9	1
2014-06-24	2	Menorca	Johnson	9	B	5	3	7-LB	0	0	0
2014-06-24	2	Menorca	Johnson	9	B	5	3	8-TF	4	1	1
2014-06-24	2	Menorca	Johnson	9	B	5	3	Barens	0	0	0
2014-06-24	2	Menorca	Johnson	9	B	6	1	1-ET	0	0	0
2014-06-24	2	Menorca	Johnson	9	B	6	1	2-SL	0	0	0
2014-06-24	2	Menorca	Johnson	9	B	6	1	3-FI	6	6	1
2014-06-24	2	Menorca	Johnson	9	B	6	1	4-TU	0	0	0
2014-06-24	2	Menorca	Johnson	9	B	6	1	5-PL	0	0	0
2014-06-24	2	Menorca	Johnson	9	B	6	1	6-BT	0	0	0
2014-06-24	2	Menorca	Johnson	9	B	6	1	7-LB	18	3	1
2014-06-24	2	Menorca	Johnson	9	B	6	1	8-TF	25	0	2
2014-06-24	2	Menorca	Johnson	9	B	6	1	Barens	0	0	0
2014-06-24	2	Menorca	Johnson	9	B	6	2	1-ET	0	0	0
2014-06-24	2	Menorca	Johnson	9	B	6	2	2-SL	0	0	0
2014-06-24	2	Menorca	Johnson	9	B	6	2	3-FI	8	5	1
2014-06-24	2	Menorca	Johnson	9	B	6	2	4-TU	0	0	0
2014-06-24	2	Menorca	Johnson	9	B	6	2	5-PL	2	7	1
2014-06-24	2	Menorca	Johnson	9	B	6	2	6-BT	2	4	1
2014-06-24	2	Menorca	Johnson	9	B	6	2	7-LB	20	3	1
2014-06-24	2	Menorca	Johnson	9	B	6	2	8-TF	0	0	0
2014-06-24	2	Menorca	Johnson	9	B	6	2	Barens	0	0	0
2014-06-24	2	Menorca	Johnson	9	B	6	3	1-ET	0	0	0
2014-06-24	2	Menorca	Johnson	9	B	6	3	2-SL	0	0	0
2014-06-24	2	Menorca	Johnson	9	B	6	3	3-FI	7	6	2
2014-06-24	2	Menorca	Johnson	9	B	6	3	4-TU	0	0	0
2014-06-24	2	Menorca	Johnson	9	B	6	3	5-PL	0	0	0
2014-06-24	2	Menorca	Johnson	9	B	6	3	6-BT	0	0	0
2014-06-24	2	Menorca	Johnson	9	B	6	3	7-LB	25	3	1
2014-06-24	2	Menorca	Johnson	9	B	6	3	8-TF	20	2	1
2014-06-24	2	Menorca	Johnson	9	B	6	3	Barens	0	0	0
2014-06-24	2	Menorca	Hilmar	9	A	1	1	1-ET	8	6	1
2014-06-24	2	Menorca	Hilmar	9	A	1	1	2-SL	0	0	0
2014-06-24	2	Menorca	Hilmar	9	A	1	1	3-FI	0	0	0
2014-06-24	2	Menorca	Hilmar	9	A	1	1	4-TU	0	0	0
2014-06-24	2	Menorca	Hilmar	9	A	1	1	5-PL	0	0	0
2014-06-24	2	Menorca	Hilmar	9	A	1	1	6-BT	0	0	0
2014-06-24	2	Menorca	Hilmar	9	A	1	1	7-LB	13	2	1
2014-06-24	2	Menorca	Hilmar	9	A	1	1	8-TF	9	2	2
2014-06-24	2	Menorca	Hilmar	9	A	1	1	Barens	0	0	0
2014-06-24	2	Menorca	Hilmar	9	A	1	2	1-ET	25	7	1
2014-06-24	2	Menorca	Hilmar	9	A	1	2	2-SL	0	0	0
2014-06-24	2	Menorca	Hilmar	9	A	1	2	3-FI	0	0	0
2014-06-24	2	Menorca	Hilmar	9	A	1	2	4-TU	0	0	0
2014-06-24	2	Menorca	Hilmar	9	A	1	2	5-PL	0	0	0
2014-06-24	2	Menorca	Hilmar	9	A	1	2	6-BT	0	0	0
2014-06-24	2	Menorca	Hilmar	9	A	1	2	7-LB	1	2	1
2014-06-24	2	Menorca	Hilmar	9	A	1	2	8-TF	3	2	2
2014-06-24	2	Menorca	Hilmar	9	A	1	2	Barens	0	0	0
2014-06-24	2	Menorca	Hilmar	9	A	1	3	1-ET	7	8	2
2014-06-24	2	Menorca	Hilmar	9	A	1	3	2-SL	0	0	0
2014-06-24	2	Menorca	Hilmar	9	A	1	3	3-FI	1	7	2
2014-06-24	2	Menorca	Hilmar	9	A	1	3	4-TU	0	0	0
2014-06-24	2	Menorca	Hilmar	9	A	1	3	5-PL	0	0	0
2014-06-24	2	Menorca	Hilmar	9	A	1	3	6-BT	0	0	0
2014-06-24	2	Menorca	Hilmar	9	A	1	3	7-LB	13	3	0
2014-06-24	2	Menorca	Hilmar	9	A	1	3	8-TF	15	2	3
2014-06-24	2	Menorca	Hilmar	9	A	1	3	Barens	4	0	0
2014-06-24	2	Menorca	Hilmar	9	A	2	1	1-ET	10	7	1
2014-06-24	2	Menorca	Hilmar	9	A	2	1	2-SL	0	0	0
2014-06-24	2	Menorca	Hilmar	9	A	2	1	3-FI	4	8	1
2014-06-24	2	Menorca	Hilmar	9	A	2	1	4-TU	0	0	0
2014-06-24	2	Menorca	Hilmar	9	A	2	1	5-PL	0	0	0
2014-06-24	2	Menorca	Hilmar	9	A	2	1	6-BT	0	0	0
2014-06-24	2	Menorca	Hilmar	9	A	2	1	7-LB	11	3	0
2014-06-24	2	Menorca	Hilmar	9	A	2	1	8-TF	7	2	3
2014-06-24	2	Menorca	Hilmar	9	A	2	1	Barens	5	0	0
2014-06-24	2	Menorca	Hilmar	9	A	2	2	1-ET	23	6	1
2014-06-24	2	Menorca	Hilmar	9	A	2	2	2-SL	0	0	0
2014-06-24	2	Menorca	Hilmar	9	A	2	2	3-FI	4	7	1
2014-06-24	2	Menorca	Hilmar	9	A	2	2	4-TU	0	0	0
2014-06-24	2	Menorca	Hilmar	9	A	2	2	5-PL	0	0	0
2014-06-24	2	Menorca	Hilmar	9	A	2	2	6-BT	0	0	0
2014-06-24	2	Menorca	Hilmar	9	A	2	2	7-LB	5	2	1
2014-06-24	2	Menorca	Hilmar	9	A	2	2	8-TF	10	2	2
2014-06-24	2	Menorca	Hilmar	9	A	2	2	Barens	0	0	0
2014-06-24	2	Menorca	Hilmar	9	A	2	3	1-ET	5	9	1
2014-06-24	2	Menorca	Hilmar	9	A	2	3	2-SL	0	0	0
2014-06-24	2	Menorca	Hilmar	9	A	2	3	3-FI	7	7	1
2014-06-24	2	Menorca	Hilmar	9	A	2	3	4-TU	0	0	0
2014-06-24	2	Menorca	Hilmar	9	A	2	3	5-PL	0	0	0
2014-06-24	2	Menorca	Hilmar	9	A	2	3	6-BT	0	0	0
2014-06-24	2	Menorca	Hilmar	9	A	2	3	7-LB	16	2	1
2014-06-24	2	Menorca	Hilmar	9	A	2	3	8-TF	17	2	3
2014-06-24	2	Menorca	Hilmar	9	A	2	3	Barens	1	0	0
2014-06-24	2	Menorca	Hilmar	9	A	3	1	1-ET	11	8	1
2014-06-24	2	Menorca	Hilmar	9	A	3	1	2-SL	0	0	0
2014-06-24	2	Menorca	Hilmar	9	A	3	1	3-FI	0	0	0
2014-06-24	2	Menorca	Hilmar	9	A	3	1	4-TU	0	0	0
2014-06-24	2	Menorca	Hilmar	9	A	3	1	5-PL	0	0	0
2014-06-24	2	Menorca	Hilmar	9	A	3	1	6-BT	0	0	0
2014-06-24	2	Menorca	Hilmar	9	A	3	1	7-LB	20	3	1
2014-06-24	2	Menorca	Hilmar	9	A	3	1	8-TF	14	2	3
2014-06-24	2	Menorca	Hilmar	9	A	3	1	Barens	0	0	0
2014-06-24	2	Menorca	Hilmar	9	A	3	2	1-ET	7	8	1
2014-06-24	2	Menorca	Hilmar	9	A	3	2	2-SL	0	0	0
2014-06-24	2	Menorca	Hilmar	9	A	3	2	3-FI	3	4	1
2014-06-24	2	Menorca	Hilmar	9	A	3	2	4-TU	0	0	0
2014-06-24	2	Menorca	Hilmar	9	A	3	2	5-PL	0	0	0
2014-06-24	2	Menorca	Hilmar	9	A	3	2	6-BT	0	0	0
2014-06-24	2	Menorca	Hilmar	9	A	3	2	7-LB	17	4	1
2014-06-24	2	Menorca	Hilmar	9	A	3	2	8-TF	12	2	3
2014-06-24	2	Menorca	Hilmar	9	A	3	2	Barens	1	0	0
2014-06-24	2	Menorca	Hilmar	9	A	3	3	1-ET	12	7	1
2014-06-24	2	Menorca	Hilmar	9	A	3	3	2-SL	0	0	0
2014-06-24	2	Menorca	Hilmar	9	A	3	3	3-FI	9	7	1
2014-06-24	2	Menorca	Hilmar	9	A	3	3	4-TU	0	0	0
2014-06-24	2	Menorca	Hilmar	9	A	3	3	5-PL	0	0	0
2014-06-24	2	Menorca	Hilmar	9	A	3	3	6-BT	0	0	0
2014-06-24	2	Menorca	Hilmar	9	A	3	3	7-LB	6	3	1
2014-06-24	2	Menorca	Hilmar	9	A	3	3	8-TF	13	2	3
2014-06-24	2	Menorca	Hilmar	9	A	3	3	Barens	0	0	0
2014-06-25	2	Menorca	Hilmar	10	A	1	1	1-ET	20	8	1
2014-06-25	2	Menorca	Hilmar	10	A	1	1	2-SL	0	0	0
2014-06-25	2	Menorca	Hilmar	10	A	1	1	3-FI	4	7	1
2014-06-25	2	Menorca	Hilmar	10	A	1	1	4-TU	0	0	0
2014-06-25	2	Menorca	Hilmar	10	A	1	1	5-PL	0	0	0
2014-06-25	2	Menorca	Hilmar	10	A	1	1	6-BT	0	0	0
2014-06-25	2	Menorca	Hilmar	10	A	1	1	7-LB	7	3	1
2014-06-25	2	Menorca	Hilmar	10	A	1	1	8-TF	4	3	1
2014-06-25	2	Menorca	Hilmar	10	A	1	1	Barens	1	0	0
2014-06-25	2	Menorca	Hilmar	10	A	1	2	1-ET	22	8	1
2014-06-25	2	Menorca	Hilmar	10	A	1	2	2-SL	0	0	0
2014-06-25	2	Menorca	Hilmar	10	A	1	2	3-FI	0	0	0
2014-06-25	2	Menorca	Hilmar	10	A	1	2	4-TU	0	0	0
2014-06-25	2	Menorca	Hilmar	10	A	1	2	5-PL	0	0	0
2014-06-25	2	Menorca	Hilmar	10	A	1	2	6-BT	0	0	0
2014-06-25	2	Menorca	Hilmar	10	A	1	2	7-LB	0	0	0
2014-06-25	2	Menorca	Hilmar	10	A	1	2	8-TF	7	5	6
2014-06-25	2	Menorca	Hilmar	10	A	1	2	Barens	0	0	0
2014-06-25	2	Menorca	Hilmar	10	A	1	3	1-ET	24	10	1
2014-06-25	2	Menorca	Hilmar	10	A	1	3	2-SL	0	0	0
2014-06-25	2	Menorca	Hilmar	10	A	1	3	3-FI	0	0	0
2014-06-25	2	Menorca	Hilmar	10	A	1	3	4-TU	0	0	0
2014-06-25	2	Menorca	Hilmar	10	A	1	3	5-PL	0	0	0
2014-06-25	2	Menorca	Hilmar	10	A	1	3	6-BT	0	0	0
2014-06-25	2	Menorca	Hilmar	10	A	1	3	7-LB	0	0	0
2014-06-25	2	Menorca	Hilmar	10	A	1	3	8-TF	6	4	1
2014-06-25	2	Menorca	Hilmar	10	A	1	3	Barens	0	0	0
2014-06-25	2	Menorca	Hilmar	10	A	2	1	1-ET	15	12	1
2014-06-25	2	Menorca	Hilmar	10	A	2	1	2-SL	0	0	0
2014-06-25	2	Menorca	Hilmar	10	A	2	1	3-FI	10	12	1
2014-06-25	2	Menorca	Hilmar	10	A	2	1	4-TU	0	0	0
2014-06-25	2	Menorca	Hilmar	10	A	2	1	5-PL	0	0	0
2014-06-25	2	Menorca	Hilmar	10	A	2	1	6-BT	2	10	1
2014-06-25	2	Menorca	Hilmar	10	A	2	1	7-LB	0	0	0
2014-06-25	2	Menorca	Hilmar	10	A	2	1	8-TF	2	4	1
2014-06-25	2	Menorca	Hilmar	10	A	2	1	Barens	0	0	0
2014-06-25	2	Menorca	Hilmar	10	A	2	2	1-ET	9	8	1
2014-06-25	2	Menorca	Hilmar	10	A	2	2	2-SL	0	0	0
2014-06-25	2	Menorca	Hilmar	10	A	2	2	3-FI	7	12	1
2014-06-25	2	Menorca	Hilmar	10	A	2	2	4-TU	0	0	0
2014-06-25	2	Menorca	Hilmar	10	A	2	2	5-PL	1	5	1
2014-06-25	2	Menorca	Hilmar	10	A	2	2	6-BT	1	8	1
2014-06-25	2	Menorca	Hilmar	10	A	2	2	7-LB	4	5	1
2014-06-25	2	Menorca	Hilmar	10	A	2	2	8-TF	0	0	0
2014-06-25	2	Menorca	Hilmar	10	A	2	2	Barens	0	0	0
2014-06-25	2	Menorca	Hilmar	10	A	2	3	1-ET	20	10	1
2014-06-25	2	Menorca	Hilmar	10	A	2	3	2-SL	0	0	0
2014-06-25	2	Menorca	Hilmar	10	A	2	3	3-FI	5	13	1
2014-06-25	2	Menorca	Hilmar	10	A	2	3	4-TU	0	0	0
2014-06-25	2	Menorca	Hilmar	10	A	2	3	5-PL	0	0	0
2014-06-25	2	Menorca	Hilmar	10	A	2	3	6-BT	0	0	0
2014-06-25	2	Menorca	Hilmar	10	A	2	3	7-LB	2	5	1
2014-06-25	2	Menorca	Hilmar	10	A	2	3	8-TF	0	0	0
2014-06-25	2	Menorca	Hilmar	10	A	2	3	Barens	0	0	0
2014-06-25	2	Menorca	Hilmar	10	A	3	1	1-ET	0	0	0
2014-06-25	2	Menorca	Hilmar	10	A	3	1	2-SL	0	0	0
2014-06-25	2	Menorca	Hilmar	10	A	3	1	3-FI	0	0	0
2014-06-25	2	Menorca	Hilmar	10	A	3	1	4-TU	0	0	0
2014-06-25	2	Menorca	Hilmar	10	A	3	1	5-PL	0	0	0
2014-06-25	2	Menorca	Hilmar	10	A	3	1	6-BT	0	0	0
2014-06-25	2	Menorca	Hilmar	10	A	3	1	7-LB	10	4	1
2014-06-25	2	Menorca	Hilmar	10	A	3	1	8-TF	3	1	2
2014-06-25	2	Menorca	Hilmar	10	A	3	1	Barens	18	0	0
2014-06-25	2	Menorca	Hilmar	10	A	3	2	1-ET	1	6	1
2014-06-25	2	Menorca	Hilmar	10	A	3	2	2-SL	2	4	1
2014-06-25	2	Menorca	Hilmar	10	A	3	2	3-FI	0	0	0
2014-06-25	2	Menorca	Hilmar	10	A	3	2	4-TU	0	0	0
2014-06-25	2	Menorca	Hilmar	10	A	3	2	5-PL	0	0	0
2014-06-25	2	Menorca	Hilmar	10	A	3	2	6-BT	0	0	0
2014-06-25	2	Menorca	Hilmar	10	A	3	2	7-LB	9	5	1
2014-06-25	2	Menorca	Hilmar	10	A	3	2	8-TF	0	0	0
2014-06-25	2	Menorca	Hilmar	10	A	3	2	Barens	25	0	0
2014-06-25	2	Menorca	Hilmar	10	A	3	3	1-ET	10	8	1
2014-06-25	2	Menorca	Hilmar	10	A	3	3	2-SL	0	0	0
2014-06-25	2	Menorca	Hilmar	10	A	3	3	3-FI	11	12	1
2014-06-25	2	Menorca	Hilmar	10	A	3	3	4-TU	0	0	0
2014-06-25	2	Menorca	Hilmar	10	A	3	3	5-PL	2	7	1
2014-06-25	2	Menorca	Hilmar	10	A	3	3	6-BT	0	0	0
2014-06-25	2	Menorca	Hilmar	10	A	3	3	7-LB	4	4	1
2014-06-25	2	Menorca	Hilmar	10	A	3	3	8-TF	5	2	3
2014-06-25	2	Menorca	Hilmar	10	A	3	3	Barens	0	0	0
2014-06-25	2	Menorca	Johnson	10	B	4	1	1-ET	4	4	1
2014-06-25	2	Menorca	Johnson	10	B	4	1	2-SL	0	0	0
2014-06-25	2	Menorca	Johnson	10	B	4	1	3-FI	13	6	2
2014-06-25	2	Menorca	Johnson	10	B	4	1	4-TU	0	0	0
2014-06-25	2	Menorca	Johnson	10	B	4	1	5-PL	0	0	0
2014-06-25	2	Menorca	Johnson	10	B	4	1	6-BT	0	0	0
2014-06-25	2	Menorca	Johnson	10	B	4	1	7-LB	20	3	1
2014-06-25	2	Menorca	Johnson	10	B	4	1	8-TF	25	1	3
2014-06-25	2	Menorca	Johnson	10	B	4	1	Barens	0	0	0
2014-06-25	2	Menorca	Johnson	10	B	4	2	1-ET	0	0	0
2014-06-25	2	Menorca	Johnson	10	B	4	2	2-SL	0	0	0
2014-06-25	2	Menorca	Johnson	10	B	4	2	3-FI	20	12	3
2014-06-25	2	Menorca	Johnson	10	B	4	2	4-TU	0	0	0
2014-06-25	2	Menorca	Johnson	10	B	4	2	5-PL	0	0	0
2014-06-25	2	Menorca	Johnson	10	B	4	2	6-BT	12	10	1
2014-06-25	2	Menorca	Johnson	10	B	4	2	7-LB	5	3	1
2014-06-25	2	Menorca	Johnson	10	B	4	2	8-TF	1	1	1
2014-06-25	2	Menorca	Johnson	10	B	4	2	Barens	0	0	0
2014-06-25	2	Menorca	Johnson	10	B	4	3	1-ET	7	8	1
2014-06-25	2	Menorca	Johnson	10	B	4	3	2-SL	0	0	0
2014-06-25	2	Menorca	Johnson	10	B	4	3	3-FI	10	8	2
2014-06-25	2	Menorca	Johnson	10	B	4	3	4-TU	0	0	0
2014-06-25	2	Menorca	Johnson	10	B	4	3	5-PL	2	6	1
2014-06-25	2	Menorca	Johnson	10	B	4	3	6-BT	3	3	1
2014-06-25	2	Menorca	Johnson	10	B	4	3	7-LB	0	0	0
2014-06-25	2	Menorca	Johnson	10	B	4	3	8-TF	0	0	0
2014-06-25	2	Menorca	Johnson	10	B	4	3	Barens	0	0	0
2014-06-25	2	Menorca	Johnson	10	B	5	1	1-ET	16	8	1
2014-06-25	2	Menorca	Johnson	10	B	5	1	2-SL	0	0	0
2014-06-25	2	Menorca	Johnson	10	B	5	1	3-FI	20	17	3
2014-06-25	2	Menorca	Johnson	10	B	5	1	4-TU	0	0	0
2014-06-25	2	Menorca	Johnson	10	B	5	1	5-PL	0	0	0
2014-06-25	2	Menorca	Johnson	10	B	5	1	6-BT	0	0	0
2014-06-25	2	Menorca	Johnson	10	B	5	1	7-LB	1	2	1
2014-06-25	2	Menorca	Johnson	10	B	5	1	8-TF	0	0	0
2014-06-25	2	Menorca	Johnson	10	B	5	1	Barens	0	0	0
2014-06-25	2	Menorca	Johnson	10	B	5	2	1-ET	12	8	1
2014-06-25	2	Menorca	Johnson	10	B	5	2	2-SL	0	0	0
2014-06-25	2	Menorca	Johnson	10	B	5	2	3-FI	13	11	3
2014-06-25	2	Menorca	Johnson	10	B	5	2	4-TU	0	0	0
2014-06-25	2	Menorca	Johnson	10	B	5	2	5-PL	0	0	0
2014-06-25	2	Menorca	Johnson	10	B	5	2	6-BT	0	0	0
2014-06-25	2	Menorca	Johnson	10	B	5	2	7-LB	7	3	1
2014-06-25	2	Menorca	Johnson	10	B	5	2	8-TF	0	0	0
2014-06-25	2	Menorca	Johnson	10	B	5	2	Barens	0	0	0
2014-06-25	2	Menorca	Johnson	10	B	5	3	1-ET	0	0	0
2014-06-25	2	Menorca	Johnson	10	B	5	3	2-SL	0	0	0
2014-06-25	2	Menorca	Johnson	10	B	5	3	3-FI	18	9	2
2014-06-25	2	Menorca	Johnson	10	B	5	3	4-TU	0	0	0
2014-06-25	2	Menorca	Johnson	10	B	5	3	5-PL	0	0	0
2014-06-25	2	Menorca	Johnson	10	B	5	3	6-BT	3	7	1
2014-06-25	2	Menorca	Johnson	10	B	5	3	7-LB	9	3	1
2014-06-25	2	Menorca	Johnson	10	B	5	3	8-TF	25	1	3
2014-06-25	2	Menorca	Johnson	10	B	5	3	Barens	0	0	0
2014-06-25	2	Menorca	Johnson	10	B	6	1	1-ET	6	8	1
2014-06-25	2	Menorca	Johnson	10	B	6	1	2-SL	0	0	0
2014-06-25	2	Menorca	Johnson	10	B	6	1	3-FI	7	12	2
2014-06-25	2	Menorca	Johnson	10	B	6	1	4-TU	0	0	0
2014-06-25	2	Menorca	Johnson	10	B	6	1	5-PL	0	0	0
2014-06-25	2	Menorca	Johnson	10	B	6	1	6-BT	0	0	0
2014-06-25	2	Menorca	Johnson	10	B	6	1	7-LB	3	4	1
2014-06-25	2	Menorca	Johnson	10	B	6	1	8-TF	25	1	3
2014-06-25	2	Menorca	Johnson	10	B	6	1	Barens	0	0	0
2014-06-25	2	Menorca	Johnson	10	B	6	2	1-ET	6	5	1
2014-06-25	2	Menorca	Johnson	10	B	6	2	2-SL	0	0	0
2014-06-25	2	Menorca	Johnson	10	B	6	2	3-FI	18	6	2
2014-06-25	2	Menorca	Johnson	10	B	6	2	4-TU	0	0	0
2014-06-25	2	Menorca	Johnson	10	B	6	2	5-PL	0	0	0
2014-06-25	2	Menorca	Johnson	10	B	6	2	6-BT	0	0	0
2014-06-25	2	Menorca	Johnson	10	B	6	2	7-LB	11	3	1
2014-06-25	2	Menorca	Johnson	10	B	6	2	8-TF	25	1	2
2014-06-25	2	Menorca	Johnson	10	B	6	2	Barens	0	0	0
2014-06-25	2	Menorca	Johnson	10	B	6	3	1-ET	1	10	1
2014-06-25	2	Menorca	Johnson	10	B	6	3	2-SL	0	0	0
2014-06-25	2	Menorca	Johnson	10	B	6	3	3-FI	25	7	4
2014-06-25	2	Menorca	Johnson	10	B	6	3	4-TU	0	0	0
2014-06-25	2	Menorca	Johnson	10	B	6	3	5-PL	0	0	0
2014-06-25	2	Menorca	Johnson	10	B	6	3	6-BT	0	0	0
2014-06-25	2	Menorca	Johnson	10	B	6	3	7-LB	12	3	1
2014-06-25	2	Menorca	Johnson	10	B	6	3	8-TF	0	0	0
2014-06-25	2	Menorca	Johnson	10	B	6	3	Barens	0	0	0
2014-06-26	2	Menorca	Hilmar	11	A	1	1	1-ET	0	0	0
2014-06-26	2	Menorca	Hilmar	11	A	1	1	2-SL	0	0	0
2014-06-26	2	Menorca	Hilmar	11	A	1	1	3-FI	8	12	1
2014-06-26	2	Menorca	Hilmar	11	A	1	1	4-TU	0	0	0
2014-06-26	2	Menorca	Hilmar	11	A	1	1	5-PL	0	0	0
2014-06-26	2	Menorca	Hilmar	11	A	1	1	6-BT	2	8	1
2014-06-26	2	Menorca	Hilmar	11	A	1	1	7-LB	22	4	1
2014-06-26	2	Menorca	Hilmar	11	A	1	1	8-TF	10	2	4
2014-06-26	2	Menorca	Hilmar	11	A	1	1	Barens	1	0	0
2014-06-26	2	Menorca	Hilmar	11	A	1	2	1-ET	0	0	0
2014-06-26	2	Menorca	Hilmar	11	A	1	2	2-SL	0	0	0
2014-06-26	2	Menorca	Hilmar	11	A	1	2	3-FI	11	11	1
2014-06-26	2	Menorca	Hilmar	11	A	1	2	4-TU	0	0	0
2014-06-26	2	Menorca	Hilmar	11	A	1	2	5-PL	0	0	0
2014-06-26	2	Menorca	Hilmar	11	A	1	2	6-BT	10	9	1
2014-06-26	2	Menorca	Hilmar	11	A	1	2	7-LB	17	4	1
2014-06-26	2	Menorca	Hilmar	11	A	1	2	8-TF	7	2	4
2014-06-26	2	Menorca	Hilmar	11	A	1	2	Barens	1	0	0
2014-06-26	2	Menorca	Hilmar	11	A	1	3	1-ET	1	8	1
2014-06-26	2	Menorca	Hilmar	11	A	1	3	2-SL	0	0	0
2014-06-26	2	Menorca	Hilmar	11	A	1	3	3-FI	5	8	1
2014-06-26	2	Menorca	Hilmar	11	A	1	3	4-TU	0	0	0
2014-06-26	2	Menorca	Hilmar	11	A	1	3	5-PL	0	0	0
2014-06-26	2	Menorca	Hilmar	11	A	1	3	6-BT	0	0	0
2014-06-26	2	Menorca	Hilmar	11	A	1	3	7-LB	22	4	1
2014-06-26	2	Menorca	Hilmar	11	A	1	3	8-TF	0	0	0
2014-06-26	2	Menorca	Hilmar	11	A	1	3	Barens	2	0	0
2014-06-26	2	Menorca	Hilmar	11	A	2	1	1-ET	0	0	0
2014-06-26	2	Menorca	Hilmar	11	A	2	1	2-SL	0	0	0
2014-06-26	2	Menorca	Hilmar	11	A	2	1	3-FI	0	0	0
2014-06-26	2	Menorca	Hilmar	11	A	2	1	4-TU	1	6	1
2014-06-26	2	Menorca	Hilmar	11	A	2	1	5-PL	0	0	0
2014-06-26	2	Menorca	Hilmar	11	A	2	1	6-BT	5	6	1
2014-06-26	2	Menorca	Hilmar	11	A	2	1	7-LB	11	4	1
2014-06-26	2	Menorca	Hilmar	11	A	2	1	8-TF	16	2	3
2014-06-26	2	Menorca	Hilmar	11	A	2	1	Barens	0	0	0
2014-06-26	2	Menorca	Hilmar	11	A	2	2	1-ET	0	0	0
2014-06-26	2	Menorca	Hilmar	11	A	2	2	2-SL	0	0	0
2014-06-26	2	Menorca	Hilmar	11	A	2	2	3-FI	1	5	1
2014-06-26	2	Menorca	Hilmar	11	A	2	2	4-TU	0	0	0
2014-06-26	2	Menorca	Hilmar	11	A	2	2	5-PL	0	0	0
2014-06-26	2	Menorca	Hilmar	11	A	2	2	6-BT	0	0	0
2014-06-26	2	Menorca	Hilmar	11	A	2	2	7-LB	11	4	1
2014-06-26	2	Menorca	Hilmar	11	A	2	2	8-TF	25	3	3
2014-06-26	2	Menorca	Hilmar	11	A	2	2	Barens	0	0	0
2014-06-26	2	Menorca	Hilmar	11	A	2	3	1-ET	0	0	0
2014-06-26	2	Menorca	Hilmar	11	A	2	3	2-SL	0	0	0
2014-06-26	2	Menorca	Hilmar	11	A	2	3	3-FI	9	10	1
2014-06-26	2	Menorca	Hilmar	11	A	2	3	4-TU	0	0	0
2014-06-26	2	Menorca	Hilmar	11	A	2	3	5-PL	0	0	0
2014-06-26	2	Menorca	Hilmar	11	A	2	3	6-BT	14	7	1
2014-06-26	2	Menorca	Hilmar	11	A	2	3	7-LB	20	4	1
2014-06-26	2	Menorca	Hilmar	11	A	2	3	8-TF	6	2	3
2014-06-26	2	Menorca	Hilmar	11	A	2	3	Barens	0	0	0
2014-06-26	2	Menorca	Hilmar	11	A	3	1	1-ET	0	0	0
2014-06-26	2	Menorca	Hilmar	11	A	3	1	2-SL	0	0	0
2014-06-26	2	Menorca	Hilmar	11	A	3	1	3-FI	0	0	0
2014-06-26	2	Menorca	Hilmar	11	A	3	1	4-TU	0	0	0
2014-06-26	2	Menorca	Hilmar	11	A	3	1	5-PL	0	0	0
2014-06-26	2	Menorca	Hilmar	11	A	3	1	6-BT	3	7	1
2014-06-26	2	Menorca	Hilmar	11	A	3	1	7-LB	15	4	1
2014-06-26	2	Menorca	Hilmar	11	A	3	1	8-TF	25	2	3
2014-06-26	2	Menorca	Hilmar	11	A	3	1	Barens	0	0	0
2014-06-26	2	Menorca	Hilmar	11	A	3	2	1-ET	0	0	0
2014-06-26	2	Menorca	Hilmar	11	A	3	2	2-SL	0	0	0
2014-06-26	2	Menorca	Hilmar	11	A	3	2	3-FI	1	7	1
2014-06-26	2	Menorca	Hilmar	11	A	3	2	4-TU	0	0	0
2014-06-26	2	Menorca	Hilmar	11	A	3	2	5-PL	0	0	0
2014-06-26	2	Menorca	Hilmar	11	A	3	2	6-BT	8	12	1
2014-06-26	2	Menorca	Hilmar	11	A	3	2	7-LB	12	4	1
2014-06-26	2	Menorca	Hilmar	11	A	3	2	8-TF	5	2	2
2014-06-26	2	Menorca	Hilmar	11	A	3	2	Barens	0	0	0
2014-06-26	2	Menorca	Hilmar	11	A	3	3	1-ET	0	0	0
2014-06-26	2	Menorca	Hilmar	11	A	3	3	2-SL	0	0	0
2014-06-26	2	Menorca	Hilmar	11	A	3	3	3-FI	0	0	0
2014-06-26	2	Menorca	Hilmar	11	A	3	3	4-TU	0	0	0
2014-06-26	2	Menorca	Hilmar	11	A	3	3	5-PL	0	0	0
2014-06-26	2	Menorca	Hilmar	11	A	3	3	6-BT	5	6	1
2014-06-26	2	Menorca	Hilmar	11	A	3	3	7-LB	15	4	1
2014-06-26	2	Menorca	Hilmar	11	A	3	3	8-TF	20	2	3
2014-06-26	2	Menorca	Hilmar	11	A	3	3	Barens	3	0	0
2014-06-26	2	Menorca	Johnson	11	B	4	1	1-ET	9	12	1
2014-06-26	2	Menorca	Johnson	11	B	4	1	2-SL	0	0	0
2014-06-26	2	Menorca	Johnson	11	B	4	1	3-FI	3	7	2
2014-06-26	2	Menorca	Johnson	11	B	4	1	4-TU	0	0	0
2014-06-26	2	Menorca	Johnson	11	B	4	1	5-PL	0	0	0
2014-06-26	2	Menorca	Johnson	11	B	4	1	6-BT	2	11	1
2014-06-26	2	Menorca	Johnson	11	B	4	1	7-LB	19	3	1
2014-06-26	2	Menorca	Johnson	11	B	4	1	8-TF	0	0	0
2014-06-26	2	Menorca	Johnson	11	B	4	1	Barens	0	0	0
2014-06-26	2	Menorca	Johnson	11	B	4	2	1-ET	5	9	1
2014-06-26	2	Menorca	Johnson	11	B	4	2	2-SL	0	0	0
2014-06-26	2	Menorca	Johnson	11	B	4	2	3-FI	7	9	1
2014-06-26	2	Menorca	Johnson	11	B	4	2	4-TU	0	0	0
2014-06-26	2	Menorca	Johnson	11	B	4	2	5-PL	0	0	0
2014-06-26	2	Menorca	Johnson	11	B	4	2	6-BT	3	6	1
2014-06-26	2	Menorca	Johnson	11	B	4	2	7-LB	20	3	1
2014-06-26	2	Menorca	Johnson	11	B	4	2	8-TF	4	0	0
2014-06-26	2	Menorca	Johnson	11	B	4	2	Barens	0	0	0
2014-06-26	2	Menorca	Johnson	11	B	4	3	1-ET	0	0	0
2014-06-26	2	Menorca	Johnson	11	B	4	3	2-SL	0	0	0
2014-06-26	2	Menorca	Johnson	11	B	4	3	3-FI	0	0	0
2014-06-26	2	Menorca	Johnson	11	B	4	3	4-TU	0	0	0
2014-06-26	2	Menorca	Johnson	11	B	4	3	5-PL	0	0	0
2014-06-26	2	Menorca	Johnson	11	B	4	3	6-BT	0	0	0
2014-06-26	2	Menorca	Johnson	11	B	4	3	7-LB	21	3	1
2014-06-26	2	Menorca	Johnson	11	B	4	3	8-TF	4	1	2
2014-06-26	2	Menorca	Johnson	11	B	4	3	Barens	20	0	0
2014-06-26	2	Menorca	Johnson	11	B	5	1	1-ET	7	6	1
2014-06-26	2	Menorca	Johnson	11	B	5	1	2-SL	0	0	0
2014-06-26	2	Menorca	Johnson	11	B	5	1	3-FI	13	7	2
2014-06-26	2	Menorca	Johnson	11	B	5	1	4-TU	0	0	0
2014-06-26	2	Menorca	Johnson	11	B	5	1	5-PL	1	8	1
2014-06-26	2	Menorca	Johnson	11	B	5	1	6-BT	0	0	0
2014-06-26	2	Menorca	Johnson	11	B	5	1	7-LB	17	3	1
2014-06-26	2	Menorca	Johnson	11	B	5	1	8-TF	4	1	2
2014-06-26	2	Menorca	Johnson	11	B	5	1	Barens	0	0	0
2014-06-26	2	Menorca	Johnson	11	B	5	2	1-ET	8	7	1
2014-06-26	2	Menorca	Johnson	11	B	5	2	2-SL	0	0	0
2014-06-26	2	Menorca	Johnson	11	B	5	2	3-FI	8	6	2
2014-06-26	2	Menorca	Johnson	11	B	5	2	4-TU	0	0	0
2014-06-26	2	Menorca	Johnson	11	B	5	2	5-PL	0	0	0
2014-06-26	2	Menorca	Johnson	11	B	5	2	6-BT	0	0	0
2014-06-26	2	Menorca	Johnson	11	B	5	2	7-LB	21	3	1
2014-06-26	2	Menorca	Johnson	11	B	5	2	8-TF	6	1	1
2014-06-26	2	Menorca	Johnson	11	B	5	2	Barens	1	0	0
2014-06-26	2	Menorca	Johnson	11	B	5	3	1-ET	0	0	0
2014-06-26	2	Menorca	Johnson	11	B	5	3	2-SL	0	0	0
2014-06-26	2	Menorca	Johnson	11	B	5	3	3-FI	0	0	0
2014-06-26	2	Menorca	Johnson	11	B	5	3	4-TU	0	0	0
2014-06-26	2	Menorca	Johnson	11	B	5	3	5-PL	0	0	0
2014-06-26	2	Menorca	Johnson	11	B	5	3	6-BT	0	0	0
2014-06-26	2	Menorca	Johnson	11	B	5	3	7-LB	10	3	1
2014-06-26	2	Menorca	Johnson	11	B	5	3	8-TF	2	1	2
2014-06-26	2	Menorca	Johnson	11	B	5	3	Barens	21	0	0
2014-06-26	2	Menorca	Johnson	11	B	6	1	1-ET	0	0	0
2014-06-26	2	Menorca	Johnson	11	B	6	1	2-SL	0	0	0
2014-06-26	2	Menorca	Johnson	11	B	6	1	3-FI	1	6	1
2014-06-26	2	Menorca	Johnson	11	B	6	1	4-TU	0	0	0
2014-06-26	2	Menorca	Johnson	11	B	6	1	5-PL	0	0	0
2014-06-26	2	Menorca	Johnson	11	B	6	1	6-BT	2	6	1
2014-06-26	2	Menorca	Johnson	11	B	6	1	7-LB	17	3	1
2014-06-26	2	Menorca	Johnson	11	B	6	1	8-TF	2	0	1
2014-06-26	2	Menorca	Johnson	11	B	6	1	Barens	14	0	0
2014-06-26	2	Menorca	Johnson	11	B	6	2	1-ET	1	6	1
2014-06-26	2	Menorca	Johnson	11	B	6	2	2-SL	0	0	0
2014-06-26	2	Menorca	Johnson	11	B	6	2	3-FI	5	9	2
2014-06-26	2	Menorca	Johnson	11	B	6	2	4-TU	0	0	0
2014-06-26	2	Menorca	Johnson	11	B	6	2	5-PL	0	0	0
2014-06-26	2	Menorca	Johnson	11	B	6	2	6-BT	0	0	0
2014-06-26	2	Menorca	Johnson	11	B	6	2	7-LB	17	3	1
2014-06-26	2	Menorca	Johnson	11	B	6	2	8-TF	0	0	0
2014-06-26	2	Menorca	Johnson	11	B	6	2	Barens	0	0	0
2014-06-26	2	Menorca	Johnson	11	B	6	3	1-ET	0	0	0
2014-06-26	2	Menorca	Johnson	11	B	6	3	2-SL	0	0	0
2014-06-26	2	Menorca	Johnson	11	B	6	3	3-FI	7	12	2
2014-06-26	2	Menorca	Johnson	11	B	6	3	4-TU	0	0	0
2014-06-26	2	Menorca	Johnson	11	B	6	3	5-PL	0	0	0
2014-06-26	2	Menorca	Johnson	11	B	6	3	6-BT	0	0	0
2014-06-26	2	Menorca	Johnson	11	B	6	3	7-LB	16	3	1
2014-06-26	2	Menorca	Johnson	11	B	6	3	8-TF	7	1	2
2014-06-26	2	Menorca	Johnson	11	B	6	3	Barens	8	0	0
2014-06-27	2	Menorca	Hilmar	12	A	1	1	1-ET	14	7	1
2014-06-27	2	Menorca	Hilmar	12	A	1	1	2-SL	0	0	0
2014-06-27	2	Menorca	Hilmar	12	A	1	1	3-FI	4	8	1
2014-06-27	2	Menorca	Hilmar	12	A	1	1	4-TU	0	0	0
2014-06-27	2	Menorca	Hilmar	12	A	1	1	5-PL	0	0	0
2014-06-27	2	Menorca	Hilmar	12	A	1	1	6-BT	5	8	1
2014-06-27	2	Menorca	Hilmar	12	A	1	1	7-LB	6	4	1
2014-06-27	2	Menorca	Hilmar	12	A	1	1	8-TF	20	2	3
2014-06-27	2	Menorca	Hilmar	12	A	1	1	Barens	0	0	0
2014-06-27	2	Menorca	Hilmar	12	A	1	2	1-ET	7	7	2
2014-06-27	2	Menorca	Hilmar	12	A	1	2	2-SL	0	0	0
2014-06-27	2	Menorca	Hilmar	12	A	1	2	3-FI	3	11	1
2014-06-27	2	Menorca	Hilmar	12	A	1	2	4-TU	0	0	0
2014-06-27	2	Menorca	Hilmar	12	A	1	2	5-PL	0	0	0
2014-06-27	2	Menorca	Hilmar	12	A	1	2	6-BT	1	8	1
2014-06-27	2	Menorca	Hilmar	12	A	1	2	7-LB	13	4	1
2014-06-27	2	Menorca	Hilmar	12	A	1	2	8-TF	20	2	5
2014-06-27	2	Menorca	Hilmar	12	A	1	2	Barens	0	0	0
2014-06-27	2	Menorca	Hilmar	12	A	1	3	1-ET	11	8	2
2014-06-27	2	Menorca	Hilmar	12	A	1	3	2-SL	0	0	0
2014-06-27	2	Menorca	Hilmar	12	A	1	3	3-FI	11	7	1
2014-06-27	2	Menorca	Hilmar	12	A	1	3	4-TU	0	0	0
2014-06-27	2	Menorca	Hilmar	12	A	1	3	5-PL	0	0	0
2014-06-27	2	Menorca	Hilmar	12	A	1	3	6-BT	2	11	1
2014-06-27	2	Menorca	Hilmar	12	A	1	3	7-LB	8	4	1
2014-06-27	2	Menorca	Hilmar	12	A	1	3	8-TF	25	2	3
2014-06-27	2	Menorca	Hilmar	12	A	1	3	Barens	0	0	0
2014-06-27	2	Menorca	Hilmar	12	A	2	1	1-ET	15	5	1
2014-06-27	2	Menorca	Hilmar	12	A	2	1	2-SL	0	0	0
2014-06-27	2	Menorca	Hilmar	12	A	2	1	3-FI	6	8	1
2014-06-27	2	Menorca	Hilmar	12	A	2	1	4-TU	0	0	0
2014-06-27	2	Menorca	Hilmar	12	A	2	1	5-PL	0	0	0
2014-06-27	2	Menorca	Hilmar	12	A	2	1	6-BT	3	8	1
2014-06-27	2	Menorca	Hilmar	12	A	2	1	7-LB	5	4	1
2014-06-27	2	Menorca	Hilmar	12	A	2	1	8-TF	22	2	4
2014-06-27	2	Menorca	Hilmar	12	A	2	1	Barens	0	0	0
2014-06-27	2	Menorca	Hilmar	12	A	2	2	1-ET	0	0	0
2014-06-27	2	Menorca	Hilmar	12	A	2	2	2-SL	1	4	1
2014-06-27	2	Menorca	Hilmar	12	A	2	2	3-FI	0	0	0
2014-06-27	2	Menorca	Hilmar	12	A	2	2	4-TU	5	8	1
2014-06-27	2	Menorca	Hilmar	12	A	2	2	5-PL	0	0	0
2014-06-27	2	Menorca	Hilmar	12	A	2	2	6-BT	1	8	1
2014-06-27	2	Menorca	Hilmar	12	A	2	2	7-LB	15	4	1
2014-06-27	2	Menorca	Hilmar	12	A	2	2	8-TF	25	2	3
2014-06-27	2	Menorca	Hilmar	12	A	2	2	Barens	0	0	0
2014-06-27	2	Menorca	Hilmar	12	A	2	3	1-ET	24	8	1
2014-06-27	2	Menorca	Hilmar	12	A	2	3	2-SL	0	0	0
2014-06-27	2	Menorca	Hilmar	12	A	2	3	3-FI	2	7	1
2014-06-27	2	Menorca	Hilmar	12	A	2	3	4-TU	0	0	0
2014-06-27	2	Menorca	Hilmar	12	A	2	3	5-PL	0	0	0
2014-06-27	2	Menorca	Hilmar	12	A	2	3	6-BT	0	0	0
2014-06-27	2	Menorca	Hilmar	12	A	2	3	7-LB	4	4	1
2014-06-27	2	Menorca	Hilmar	12	A	2	3	8-TF	25	2	2
2014-06-27	2	Menorca	Hilmar	12	A	2	3	Barens	0	0	0
2014-06-27	2	Menorca	Hilmar	12	A	3	1	1-ET	6	10	1
2014-06-27	2	Menorca	Hilmar	12	A	3	1	2-SL	0	0	0
2014-06-27	2	Menorca	Hilmar	12	A	3	1	3-FI	8	10	1
2014-06-27	2	Menorca	Hilmar	12	A	3	1	4-TU	0	0	0
2014-06-27	2	Menorca	Hilmar	12	A	3	1	5-PL	0	0	0
2014-06-27	2	Menorca	Hilmar	12	A	3	1	6-BT	2	10	1
2014-06-27	2	Menorca	Hilmar	12	A	3	1	7-LB	9	4	1
2014-06-27	2	Menorca	Hilmar	12	A	3	1	8-TF	22	2	3
2014-06-27	2	Menorca	Hilmar	12	A	3	1	Barens	0	0	0
2014-06-27	2	Menorca	Hilmar	12	A	3	2	1-ET	3	11	1
2014-06-27	2	Menorca	Hilmar	12	A	3	2	2-SL	0	0	0
2014-06-27	2	Menorca	Hilmar	12	A	3	2	3-FI	3	6	1
2014-06-27	2	Menorca	Hilmar	12	A	3	2	4-TU	0	0	0
2014-06-27	2	Menorca	Hilmar	12	A	3	2	5-PL	0	0	0
2014-06-27	2	Menorca	Hilmar	12	A	3	2	6-BT	2	6	1
2014-06-27	2	Menorca	Hilmar	12	A	3	2	7-LB	18	4	1
2014-06-27	2	Menorca	Hilmar	12	A	3	2	8-TF	8	2	3
2014-06-27	2	Menorca	Hilmar	12	A	3	2	Barens	0	0	0
2014-06-27	2	Menorca	Hilmar	12	A	3	3	1-ET	4	6	1
2014-06-27	2	Menorca	Hilmar	12	A	3	3	2-SL	0	0	0
2014-06-27	2	Menorca	Hilmar	12	A	3	3	3-FI	15	8	1
2014-06-27	2	Menorca	Hilmar	12	A	3	3	4-TU	0	0	0
2014-06-27	2	Menorca	Hilmar	12	A	3	3	5-PL	0	0	0
2014-06-27	2	Menorca	Hilmar	12	A	3	3	6-BT	0	0	0
2014-06-27	2	Menorca	Hilmar	12	A	3	3	7-LB	8	4	1
2014-06-27	2	Menorca	Hilmar	12	A	3	3	8-TF	22	2	3
2014-06-27	2	Menorca	Hilmar	12	A	3	3	Barens	0	0	0
2014-06-27	2	Menorca	Hilmar	12	B	4	1	1-ET	25	10	1
2014-06-27	2	Menorca	Hilmar	12	B	4	1	2-SL	0	0	0
2014-06-27	2	Menorca	Hilmar	12	B	4	1	3-FI	0	0	0
2014-06-27	2	Menorca	Hilmar	12	B	4	1	4-TU	0	0	0
2014-06-27	2	Menorca	Hilmar	12	B	4	1	5-PL	0	0	0
2014-06-27	2	Menorca	Hilmar	12	B	4	1	6-BT	0	0	0
2014-06-27	2	Menorca	Hilmar	12	B	4	1	7-LB	0	0	0
2014-06-27	2	Menorca	Hilmar	12	B	4	1	8-TF	10	2	1
2014-06-27	2	Menorca	Hilmar	12	B	4	1	Barens	0	0	0
2014-06-27	2	Menorca	Hilmar	12	B	4	2	1-ET	3	7	1
2014-06-27	2	Menorca	Hilmar	12	B	4	2	2-SL	0	0	0
2014-06-27	2	Menorca	Hilmar	12	B	4	2	3-FI	0	0	0
2014-06-27	2	Menorca	Hilmar	12	B	4	2	4-TU	0	0	0
2014-06-27	2	Menorca	Hilmar	12	B	4	2	5-PL	0	0	0
2014-06-27	2	Menorca	Hilmar	12	B	4	2	6-BT	0	0	0
2014-06-27	2	Menorca	Hilmar	12	B	4	2	7-LB	0	0	0
2014-06-27	2	Menorca	Hilmar	12	B	4	2	8-TF	25	6	1
2014-06-27	2	Menorca	Hilmar	12	B	4	2	Barens	0	0	0
2014-06-27	2	Menorca	Hilmar	12	B	4	3	1-ET	16	9	1
2014-06-27	2	Menorca	Hilmar	12	B	4	3	2-SL	0	0	0
2014-06-27	2	Menorca	Hilmar	12	B	4	3	3-FI	0	0	0
2014-06-27	2	Menorca	Hilmar	12	B	4	3	4-TU	0	0	0
2014-06-27	2	Menorca	Hilmar	12	B	4	3	5-PL	0	0	0
2014-06-27	2	Menorca	Hilmar	12	B	4	3	6-BT	0	0	0
2014-06-27	2	Menorca	Hilmar	12	B	4	3	7-LB	0	0	0
2014-06-27	2	Menorca	Hilmar	12	B	4	3	8-TF	25	6	1
2014-06-27	2	Menorca	Hilmar	12	B	4	3	Barens	0	0	0
2014-06-27	2	Menorca	Hilmar	12	B	5	1	1-ET	25	10	1
2014-06-27	2	Menorca	Hilmar	12	B	5	1	2-SL	0	0	0
2014-06-27	2	Menorca	Hilmar	12	B	5	1	3-FI	0	0	0
2014-06-27	2	Menorca	Hilmar	12	B	5	1	4-TU	0	0	0
2014-06-27	2	Menorca	Hilmar	12	B	5	1	5-PL	0	0	0
2014-06-27	2	Menorca	Hilmar	12	B	5	1	6-BT	0	0	0
2014-06-27	2	Menorca	Hilmar	12	B	5	1	7-LB	0	0	0
2014-06-27	2	Menorca	Hilmar	12	B	5	1	8-TF	6	6	1
2014-06-27	2	Menorca	Hilmar	12	B	5	1	Barens	0	0	0
2014-06-27	2	Menorca	Hilmar	12	B	5	2	1-ET	25	12	1
2014-06-27	2	Menorca	Hilmar	12	B	5	2	2-SL	0	0	0
2014-06-27	2	Menorca	Hilmar	12	B	5	2	3-FI	0	0	0
2014-06-27	2	Menorca	Hilmar	12	B	5	2	4-TU	0	0	0
2014-06-27	2	Menorca	Hilmar	12	B	5	2	5-PL	0	0	0
2014-06-27	2	Menorca	Hilmar	12	B	5	2	6-BT	0	0	0
2014-06-27	2	Menorca	Hilmar	12	B	5	2	7-LB	0	0	0
2014-06-27	2	Menorca	Hilmar	12	B	5	2	8-TF	3	6	1
2014-06-27	2	Menorca	Hilmar	12	B	5	2	Barens	0	0	0
2014-06-27	2	Menorca	Hilmar	12	B	5	3	1-ET	9	6	1
2014-06-27	2	Menorca	Hilmar	12	B	5	3	2-SL	0	0	0
2014-06-27	2	Menorca	Hilmar	12	B	5	3	3-FI	0	0	0
2014-06-27	2	Menorca	Hilmar	12	B	5	3	4-TU	0	0	0
2014-06-27	2	Menorca	Hilmar	12	B	5	3	5-PL	0	0	0
2014-06-27	2	Menorca	Hilmar	12	B	5	3	6-BT	0	0	0
2014-06-27	2	Menorca	Hilmar	12	B	5	3	7-LB	7	4	7
2014-06-27	2	Menorca	Hilmar	12	B	5	3	8-TF	25	6	1
2014-06-27	2	Menorca	Hilmar	12	B	5	3	Barens	0	0	0
2014-06-27	2	Menorca	Hilmar	12	B	6	1	1-ET	16	7	1
2014-06-27	2	Menorca	Hilmar	12	B	6	1	2-SL	0	0	0
2014-06-27	2	Menorca	Hilmar	12	B	6	1	3-FI	0	0	0
2014-06-27	2	Menorca	Hilmar	12	B	6	1	4-TU	0	0	0
2014-06-27	2	Menorca	Hilmar	12	B	6	1	5-PL	0	0	0
2014-06-27	2	Menorca	Hilmar	12	B	6	1	6-BT	0	0	0
2014-06-27	2	Menorca	Hilmar	12	B	6	1	7-LB	1	4	1
2014-06-27	2	Menorca	Hilmar	12	B	6	1	8-TF	12	3	2
2014-06-27	2	Menorca	Hilmar	12	B	6	1	Barens	0	0	0
2014-06-27	2	Menorca	Hilmar	12	B	6	2	1-ET	25	10	1
2014-06-27	2	Menorca	Hilmar	12	B	6	2	2-SL	0	0	0
2014-06-27	2	Menorca	Hilmar	12	B	6	2	3-FI	0	0	0
2014-06-27	2	Menorca	Hilmar	12	B	6	2	4-TU	0	0	0
2014-06-27	2	Menorca	Hilmar	12	B	6	2	5-PL	0	0	0
2014-06-27	2	Menorca	Hilmar	12	B	6	2	6-BT	0	0	0
2014-06-27	2	Menorca	Hilmar	12	B	6	2	7-LB	0	0	0
2014-06-27	2	Menorca	Hilmar	12	B	6	2	8-TF	4	6	1
2014-06-27	2	Menorca	Hilmar	12	B	6	2	Barens	0	0	0
2014-06-27	2	Menorca	Hilmar	12	B	6	3	1-ET	25	12	1
2014-06-27	2	Menorca	Hilmar	12	B	6	3	2-SL	0	0	0
2014-06-27	2	Menorca	Hilmar	12	B	6	3	3-FI	0	0	0
2014-06-27	2	Menorca	Hilmar	12	B	6	3	4-TU	0	0	0
2014-06-27	2	Menorca	Hilmar	12	B	6	3	5-PL	0	0	0
2014-06-27	2	Menorca	Hilmar	12	B	6	3	6-BT	0	0	0
2014-06-27	2	Menorca	Hilmar	12	B	6	3	7-LB	0	0	0
2014-06-27	2	Menorca	Hilmar	12	B	6	3	8-TF	4	6	1
2014-06-27	2	Menorca	Hilmar	12	B	6	3	Barens	0	0	0
2014-06-28	2	Menorca	Hilmar	13	A	1	1	1-ET	20	10	2
2014-06-28	2	Menorca	Hilmar	13	A	1	1	2-SL	0	0	0
2014-06-28	2	Menorca	Hilmar	13	A	1	1	3-FI	8	12	1
2014-06-28	2	Menorca	Hilmar	13	A	1	1	4-TU	0	0	0
2014-06-28	2	Menorca	Hilmar	13	A	1	1	5-PL	0	0	0
2014-06-28	2	Menorca	Hilmar	13	A	1	1	6-BT	0	0	0
2014-06-28	2	Menorca	Hilmar	13	A	1	1	7-LB	4	3	1
2014-06-28	2	Menorca	Hilmar	13	A	1	1	8-TF	0	0	0
2014-06-28	2	Menorca	Hilmar	13	A	1	1	Barens	0	0	0
2014-06-28	2	Menorca	Hilmar	13	A	1	2	1-ET	7	7	1
2014-06-28	2	Menorca	Hilmar	13	A	1	2	2-SL	0	0	0
2014-06-28	2	Menorca	Hilmar	13	A	1	2	3-FI	15	12	1
2014-06-28	2	Menorca	Hilmar	13	A	1	2	4-TU	0	0	0
2014-06-28	2	Menorca	Hilmar	13	A	1	2	5-PL	0	0	0
2014-06-28	2	Menorca	Hilmar	13	A	1	2	6-BT	1	5	1
2014-06-28	2	Menorca	Hilmar	13	A	1	2	7-LB	2	4	1
2014-06-28	2	Menorca	Hilmar	13	A	1	2	8-TF	20	2	4
2014-06-28	2	Menorca	Hilmar	13	A	1	2	Barens	0	0	0
2014-06-28	2	Menorca	Hilmar	13	A	1	3	1-ET	0	0	0
2014-06-28	2	Menorca	Hilmar	13	A	1	3	2-SL	0	0	0
2014-06-28	2	Menorca	Hilmar	13	A	1	3	3-FI	22	12	1
2014-06-28	2	Menorca	Hilmar	13	A	1	3	4-TU	0	0	0
2014-06-28	2	Menorca	Hilmar	13	A	1	3	5-PL	0	0	0
2014-06-28	2	Menorca	Hilmar	13	A	1	3	6-BT	1	7	1
2014-06-28	2	Menorca	Hilmar	13	A	1	3	7-LB	4	4	1
2014-06-28	2	Menorca	Hilmar	13	A	1	3	8-TF	25	2	4
2014-06-28	2	Menorca	Hilmar	13	A	1	3	Barens	0	0	0
2014-06-28	2	Menorca	Hilmar	13	A	2	1	1-ET	2	10	1
2014-06-28	2	Menorca	Hilmar	13	A	2	1	2-SL	0	0	0
2014-06-28	2	Menorca	Hilmar	13	A	2	1	3-FI	6	12	1
2014-06-28	2	Menorca	Hilmar	13	A	2	1	4-TU	0	0	0
2014-06-28	2	Menorca	Hilmar	13	A	2	1	5-PL	0	0	0
2014-06-28	2	Menorca	Hilmar	13	A	2	1	6-BT	0	0	0
2014-06-28	2	Menorca	Hilmar	13	A	2	1	7-LB	0	0	0
2014-06-28	2	Menorca	Hilmar	13	A	2	1	8-TF	23	6	3
2014-06-28	2	Menorca	Hilmar	13	A	2	1	Barens	0	0	0
2014-06-28	2	Menorca	Hilmar	13	A	2	2	1-ET	1	6	1
2014-06-28	2	Menorca	Hilmar	13	A	2	2	2-SL	0	0	0
2014-06-28	2	Menorca	Hilmar	13	A	2	2	3-FI	23	12	1
2014-06-28	2	Menorca	Hilmar	13	A	2	2	4-TU	0	0	0
2014-06-28	2	Menorca	Hilmar	13	A	2	2	5-PL	0	0	0
2014-06-28	2	Menorca	Hilmar	13	A	2	2	6-BT	0	0	0
2014-06-28	2	Menorca	Hilmar	13	A	2	2	7-LB	6	4	1
2014-06-28	2	Menorca	Hilmar	13	A	2	2	8-TF	15	3	3
2014-06-28	2	Menorca	Hilmar	13	A	2	2	Barens	0	0	0
2014-06-28	2	Menorca	Hilmar	13	A	2	3	1-ET	0	0	0
2014-06-28	2	Menorca	Hilmar	13	A	2	3	2-SL	0	0	0
2014-06-28	2	Menorca	Hilmar	13	A	2	3	3-FI	8	10	1
2014-06-28	2	Menorca	Hilmar	13	A	2	3	4-TU	0	0	0
2014-06-28	2	Menorca	Hilmar	13	A	2	3	5-PL	0	0	0
2014-06-28	2	Menorca	Hilmar	13	A	2	3	6-BT	0	0	0
2014-06-28	2	Menorca	Hilmar	13	A	2	3	7-LB	20	4	1
2014-06-28	2	Menorca	Hilmar	13	A	2	3	8-TF	25	4	3
2014-06-28	2	Menorca	Hilmar	13	A	2	3	Barens	0	0	0
2014-06-28	2	Menorca	Hilmar	13	A	3	1	1-ET	24	10	1
[truncated: 3,184 more rows]

## Sheet: Urchins and Sponges
Date	Campaign	Location	Observer	Station	Site	Transect	Replicate	Species	No	Size
2014-09-16	4	Mallorca	Adam	25	A	1	1	Esponjas	1	15
2014-09-16	4	Mallorca	Adam	25	A	2	2	Erizos	1	7
2014-09-16	4	Mallorca	Adam	25	A	2	2	Erizos	1	7
2014-09-16	4	Mallorca	Adam	25	A	2	2	Erizos	1	7
2014-09-16	4	Mallorca	Adam	25	A	2	2	Erizos	1	7
2014-09-16	4	Mallorca	Adam	25	A	2	2	Esponjas	1	4
2014-09-16	4	Mallorca	Adam	25	A	2	2	Esponjas	1	10
2014-09-16	4	Mallorca	Adam	25	A	2	2	Esponjas	1	6
2014-09-16	4	Mallorca	Adam	25	A	2	2	Esponjas	1	10
2014-09-16	4	Mallorca	Adam	25	A	2	2	Esponjas	1	10
2014-09-16	4	Mallorca	Adam	25	A	2	2	Esponjas	1	12
2014-09-16	4	Mallorca	Adam	25	A	2	2	Esponjas	1	9
2014-09-16	4	Mallorca	Adam	25	A	2	3	Esponjas	1	4
2014-09-16	4	Mallorca	Adam	25	A	2	3	Esponjas	1	5
2014-09-16	4	Mallorca	Adam	25	A	2	3	Esponjas	1	7
2014-09-16	4	Mallorca	Adam	25	A	3	1	Erizos	1	5
2014-09-16	4	Mallorca	Adam	25	A	3	1	Esponjas	1	10
2014-09-16	4	Mallorca	Adam	25	A	3	1	Esponjas	1	3
2014-09-16	4	Mallorca	Adam	25	A	3	1	Esponjas	1	7
2014-09-16	4	Mallorca	Adam	25	A	3	1	Esponjas	1	5
2014-09-16	4	Mallorca	Adam	25	A	3	2	Esponjas	1	4
2014-09-16	4	Mallorca	Hilmar	25	B	4	1	Esponjas	1	7
2014-09-17	4	Mallorca	Adam	26	A	1	1	Esponjas	1	6
2014-09-17	4	Mallorca	Adam	26	A	1	1	Esponjas	1	13
2014-09-17	4	Mallorca	Adam	26	A	1	1	Esponjas	1	9
2014-09-17	4	Mallorca	Adam	26	A	1	1	Esponjas	1	9
2014-09-17	4	Mallorca	Adam	26	A	1	1	Esponjas	1	14
2014-09-17	4	Mallorca	Adam	26	A	2	1	Esponjas	1	9
2014-09-17	4	Mallorca	Adam	26	A	3	1	Erizos	1	3
2014-09-17	4	Mallorca	Adam	26	A	3	3	Erizos	1	3
2014-09-17	4	Mallorca	Adam	26	A	3	3	Esponjas	1	8
2014-09-17	4	Mallorca	Hilmar	26	B	4	1	Esponjas	1	3.5
2014-09-17	4	Mallorca	Hilmar	26	B	4	2	Esponjas	1	7
2014-09-17	4	Mallorca	Hilmar	26	B	4	2	Esponjas	1	5
2014-09-17	4	Mallorca	Hilmar	26	B	4	2	Esponjas	1	8
2014-09-17	4	Mallorca	Hilmar	26	B	4	2	Esponjas	1	5
2014-09-17	4	Mallorca	Hilmar	26	B	4	3	Esponjas	1	5
2014-09-17	4	Mallorca	Hilmar	26	B	4	3	Esponjas	1	4
2014-09-17	4	Mallorca	Hilmar	26	B	5	2	Esponjas	1	4
2014-09-17	4	Mallorca	Hilmar	26	B	5	2	Esponjas	1	5
2014-09-17	4	Mallorca	Hilmar	26	B	5	2	Esponjas	1	7
2014-09-17	4	Mallorca	Hilmar	26	B	5	2	Esponjas	1	5
2014-09-17	4	Mallorca	Hilmar	26	B	5	2	Esponjas	1	5
2014-09-17	4	Mallorca	Hilmar	26	B	5	3	Erizos	1	3.5
2014-09-17	4	Mallorca	Hilmar	26	B	6	1	Esponjas	1	6.5
2014-09-17	4	Mallorca	Hilmar	26	B	6	2	Esponjas	1	8
2014-09-17	4	Mallorca	Hilmar	26	B	6	3	Esponjas	1	6
2014-09-18	4	Mallorca	Hilmar	27	A	1	1	Erizos
2014-09-18	4	Mallorca	Hilmar	27	A	1	1	Esponjas	1	4.5
2014-09-18	4	Mallorca	Hilmar	27	A	1	1	Esponjas	1	7
2014-09-18	4	Mallorca	Hilmar	27	A	1	1	Esponjas	1	8
2014-09-18	4	Mallorca	Hilmar	27	A	1	2	Erizos
2014-09-18	4	Mallorca	Hilmar	27	A	1	2	Esponjas
2014-09-18	4	Mallorca	Hilmar	27	A	1	3	Erizos
2014-09-18	4	Mallorca	Hilmar	27	A	1	3	Esponjas	1	6
2014-09-18	4	Mallorca	Hilmar	27	A	1	3	Esponjas	1	5
2014-09-18	4	Mallorca	Hilmar	27	A	1	3	Esponjas	1	3
2014-09-18	4	Mallorca	Hilmar	27	A	1	3	Esponjas	1	3.5
2014-09-18	4	Mallorca	Hilmar	27	A	1	3	Esponjas	1	7
2014-09-18	4	Mallorca	Hilmar	27	A	2	1	Erizos
2014-09-18	4	Mallorca	Hilmar	27	A	2	1	Erizos
2014-09-18	4	Mallorca	Hilmar	27	A	2	1	Esponjas	1	7
2014-09-18	4	Mallorca	Hilmar	27	A	2	1	Esponjas	1	5
2014-09-18	4	Mallorca	Hilmar	27	A	2	2	Erizos
2014-09-18	4	Mallorca	Hilmar	27	A	2	2	Esponjas	1	4
2014-09-18	4	Mallorca	Hilmar	27	A	2	2	Esponjas	1	7
2014-09-18	4	Mallorca	Hilmar	27	A	2	3	Erizos
2014-09-18	4	Mallorca	Hilmar	27	A	2	3	Esponjas
2014-09-18	4	Mallorca	Hilmar	27	A	3	1	Erizos
2014-09-18	4	Mallorca	Hilmar	27	A	3	1	Esponjas
2014-09-18	4	Mallorca	Hilmar	27	A	3	2	Erizos
2014-09-18	4	Mallorca	Hilmar	27	A	3	2	Esponjas	1	5
2014-09-18	4	Mallorca	Hilmar	27	A	3	2	Esponjas	1	4
2014-09-18	4	Mallorca	Hilmar	27	A	3	2	Esponjas	1	9
2014-09-18	4	Mallorca	Hilmar	27	A	3	3	Erizos
2014-09-18	4	Mallorca	Hilmar	27	A	3	3	Esponjas	1	4
2014-09-18	4	Mallorca	Hilmar	27	A	3	3	Esponjas	1	4
2014-09-18	4	Mallorca	Hilmar	27	A	3	3	Esponjas	1	9
2014-09-18	4	Mallorca	Hilmar	27	A	3	3	Esponjas	1	3
2014-09-18	4	Mallorca	Adam	27	B	4	1	Erizos	1	5
2014-09-18	4	Mallorca	Adam	27	B	4	1	Esponjas	1	8
2014-09-18	4	Mallorca	Adam	27	B	4	2	Erizos
2014-09-18	4	Mallorca	Adam	27	B	4	2	Esponjas
2014-09-18	4	Mallorca	Adam	27	B	4	3	Erizos
2014-09-18	4	Mallorca	Adam	27	B	4	3	Esponjas
2014-09-18	4	Mallorca	Adam	27	B	5	1	Erizos
2014-09-18	4	Mallorca	Adam	27	B	5	1	Esponjas	1	15
2014-09-18	4	Mallorca	Adam	27	B	5	2	Erizos
2014-09-18	4	Mallorca	Adam	27	B	5	2	Esponjas
2014-09-18	4	Mallorca	Adam	27	B	5	3	Erizos
2014-09-18	4	Mallorca	Adam	27	B	5	3	Esponjas
2014-09-18	4	Mallorca	Adam	27	B	6	1	Erizos
2014-09-18	4	Mallorca	Adam	27	B	6	1	Esponjas
2014-09-18	4	Mallorca	Adam	27	B	6	2	Erizos	1	5
2014-09-18	4	Mallorca	Adam	27	B	6	2	Esponjas
2014-09-18	4	Mallorca	Adam	27	B	6	3	Erizos
2014-09-18	4	Mallorca	Adam	27	B	6	3	Esponjas
2014-09-19	4	Mallorca	Adam	28	A	1	1	Erizos
2014-09-19	4	Mallorca	Adam	28	A	1	1	Esponjas	1	4
2014-09-19	4	Mallorca	Adam	28	A	1	2	Erizos	1	3
2014-09-19	4	Mallorca	Adam	28	A	1	2	Erizos	1	3
2014-09-19	4	Mallorca	Adam	28	A	1	2	Esponjas	1	8
2014-09-19	4	Mallorca	Adam	28	A	1	2	Esponjas	1	8
2014-09-19	4	Mallorca	Adam	28	A	1	2	Esponjas	1	7
2014-09-19	4	Mallorca	Adam	28	A	1	2	Esponjas	1	12
2014-09-19	4	Mallorca	Adam	28	A	1	3	Erizos
2014-09-19	4	Mallorca	Adam	28	A	1	3	Esponjas
2014-09-19	4	Mallorca	Adam	28	A	2	1	Erizos	1	2
2014-09-19	4	Mallorca	Adam	28	A	2	1	Erizos	1	2
2014-09-19	4	Mallorca	Adam	28	A	2	1	Erizos	1	2
2014-09-19	4	Mallorca	Adam	28	A	2	1	Erizos	1	2
2014-09-19	4	Mallorca	Adam	28	A	2	1	Erizos	1	2
2014-09-19	4	Mallorca	Adam	28	A	2	1	Erizos	1	2
2014-09-19	4	Mallorca	Adam	28	A	2	1	Erizos	1	2
2014-09-19	4	Mallorca	Adam	28	A	2	1	Esponjas	1	6
2014-09-19	4	Mallorca	Adam	28	A	2	2	Erizos
2014-09-19	4	Mallorca	Adam	28	A	2	2	Esponjas
2014-09-19	4	Mallorca	Adam	28	A	2	3	Erizos	1	2
2014-09-19	4	Mallorca	Adam	28	A	2	3	Erizos	1	2
2014-09-19	4	Mallorca	Adam	28	A	2	3	Esponjas
2014-09-19	4	Mallorca	Adam	28	A	3	1	Erizos
2014-09-19	4	Mallorca	Adam	28	A	3	1	Esponjas
2014-09-19	4	Mallorca	Adam	28	A	3	2	Erizos
2014-09-19	4	Mallorca	Adam	28	A	3	2	Esponjas	1	14
2014-09-19	4	Mallorca	Adam	28	A	3	3	Erizos
2014-09-19	4	Mallorca	Adam	28	A	3	3	Esponjas
2014-09-19	4	Mallorca	Hilmar	28	B	4	1	Erizos
2014-09-19	4	Mallorca	Hilmar	28	B	4	1	Esponjas
2014-09-19	4	Mallorca	Hilmar	28	B	4	2	Erizos
2014-09-19	4	Mallorca	Hilmar	28	B	4	2	Esponjas
2014-09-19	4	Mallorca	Hilmar	28	B	4	3	Erizos
2014-09-19	4	Mallorca	Hilmar	28	B	4	3	Esponjas	1	10
2014-09-19	4	Mallorca	Hilmar	28	B	5	1	Erizos
2014-09-19	4	Mallorca	Hilmar	28	B	5	1	Esponjas
2014-09-19	4	Mallorca	Hilmar	28	B	5	2	Erizos
2014-09-19	4	Mallorca	Hilmar	28	B	5	2	Esponjas
2014-09-19	4	Mallorca	Hilmar	28	B	5	3	Erizos
2014-09-19	4	Mallorca	Hilmar	28	B	5	3	Esponjas
2014-09-19	4	Mallorca	Hilmar	28	B	6	1	Erizos
2014-09-19	4	Mallorca	Hilmar	28	B	6	1	Esponjas
2014-09-19	4	Mallorca	Hilmar	28	B	6	2	Erizos
2014-09-19	4	Mallorca	Hilmar	28	B	6	2	Esponjas
2014-09-19	4	Mallorca	Hilmar	28	B	6	3	Erizos
2014-09-19	4	Mallorca	Hilmar	28	B	6	3	Esponjas
2014-09-20	4	Mallorca	Hilmar	29	A	1	1	Erizos	1	3.5
2014-09-20	4	Mallorca	Hilmar	29	A	1	1	Erizos	1	2.5
2014-09-20	4	Mallorca	Hilmar	29	A	1	1	Esponjas
2014-09-20	4	Mallorca	Hilmar	29	A	1	2	Erizos
2014-09-20	4	Mallorca	Hilmar	29	A	1	2	Esponjas
2014-09-20	4	Mallorca	Hilmar	29	A	1	3	Erizos	1	2
2014-09-20	4	Mallorca	Hilmar	29	A	1	3	Erizos	1	2.5
2014-09-20	4	Mallorca	Hilmar	29	A	1	3	Erizos	1	1.5
2014-09-20	4	Mallorca	Hilmar	29	A	1	3	Esponjas	1	10.5
2014-09-20	4	Mallorca	Hilmar	29	A	1	3	Esponjas	1	5
2014-09-20	4	Mallorca	Hilmar	29	A	1	3	Esponjas	1	5.5
2014-09-20	4	Mallorca	Hilmar	29	A	2	1	Erizos
2014-09-20	4	Mallorca	Hilmar	29	A	2	1	Erizos
2014-09-20	4	Mallorca	Hilmar	29	A	2	1	Esponjas
2014-09-20	4	Mallorca	Hilmar	29	A	2	2	Erizos
2014-09-20	4	Mallorca	Hilmar	29	A	2	2	Esponjas	1	7
2014-09-20	4	Mallorca	Hilmar	29	A	2	3	Erizos	1
2014-09-20	4	Mallorca	Hilmar	29	A	2	3	Esponjas	1	5
2014-09-20	4	Mallorca	Hilmar	29	A	3	1	Erizos
2014-09-20	4	Mallorca	Hilmar	29	A	3	1	Esponjas
2014-09-20	4	Mallorca	Hilmar	29	A	3	2	Erizos	1	4
2014-09-20	4	Mallorca	Hilmar	29	A	3	2	Erizos	1	4
2014-09-20	4	Mallorca	Hilmar	29	A	3	2	Erizos	1	3
2014-09-20	4	Mallorca	Hilmar	29	A	3	2	Erizos	1	2
2014-09-20	4	Mallorca	Hilmar	29	A	3	2	Esponjas	1	5
2014-09-20	4	Mallorca	Hilmar	29	A	3	2	Esponjas	1	9
2014-09-20	4	Mallorca	Hilmar	29	A	3	2	Esponjas	1	7
2014-09-20	4	Mallorca	Hilmar	29	A	3	2	Esponjas	1	7
2014-09-20	4	Mallorca	Hilmar	29	A	3	3	Erizos	1	4
2014-09-20	4	Mallorca	Hilmar	29	A	3	3	Erizos	1	7
2014-09-20	4	Mallorca	Hilmar	29	A	3	3	Erizos	1	3
2014-09-20	4	Mallorca	Hilmar	29	A	3	3	Erizos	1	3
2014-09-20	4	Mallorca	Hilmar	29	A	3	3	Erizos	1	4.5
2014-09-20	4	Mallorca	Hilmar	29	A	3	3	Erizos	1	3
2014-09-20	4	Mallorca	Hilmar	29	A	3	3	Erizos	1	4
2014-09-20	4	Mallorca	Hilmar	29	A	3	3	Erizos	1	6
2014-09-20	4	Mallorca	Hilmar	29	A	3	3	Esponjas	1	10
2014-09-20	4	Mallorca	Hilmar	29	A	3	3	Esponjas	1	8
2014-09-20	4	Mallorca	Adam	29	B	4	1	Erizos	1	2
2014-09-20	4	Mallorca	Adam	29	B	4	1	Esponjas
2014-09-20	4	Mallorca	Adam	29	B	4	2	Erizos	1	2
2014-09-20	4	Mallorca	Adam	29	B	4	2	Esponjas
2014-09-20	4	Mallorca	Adam	29	B	4	3	Erizos
2014-09-20	4	Mallorca	Adam	29	B	4	3	Esponjas
2014-09-20	4	Mallorca	Adam	29	B	5	1	Erizos
2014-09-20	4	Mallorca	Adam	29	B	5	1	Esponjas	1	4
2014-09-20	4	Mallorca	Adam	29	B	5	1	Esponjas	1	4
2014-09-20	4	Mallorca	Adam	29	B	5	1	Esponjas	1	7
2014-09-20	4	Mallorca	Adam	29	B	5	2	Erizos	1	3
2014-09-20	4	Mallorca	Adam	29	B	5	2	Erizos	1	4
2014-09-20	4	Mallorca	Adam	29	B	5	2	Esponjas	1	7
2014-09-20	4	Mallorca	Adam	29	B	5	3	Erizos	1
2014-09-20	4	Mallorca	Adam	29	B	5	3	Esponjas	1
2014-09-20	4	Mallorca	Adam	29	B	6	1	Erizos	1	2
2014-09-20	4	Mallorca	Adam	29	B	6	1	Esponjas	1
2014-09-20	4	Mallorca	Adam	29	B	6	2	Erizos	1	2
2014-09-20	4	Mallorca	Adam	29	B	6	2	Esponjas	1	4
2014-09-20	4	Mallorca	Adam	29	B	6	2	Esponjas	1	9
2014-09-20	4	Mallorca	Adam	29	B	6	2	Esponjas	1	12
2014-09-20	4	Mallorca	Adam	29	B	6	2	Esponjas	1	4
2014-09-20	4	Mallorca	Adam	29	B	6	2	Esponjas	1	6
2014-09-20	4	Mallorca	Adam	29	B	6	2	Esponjas	1	4
2014-09-20	4	Mallorca	Adam	29	B	6	3	Erizos	1	2
2014-09-20	4	Mallorca	Adam	29	B	6	3	Erizos	1	2
2014-09-20	4	Mallorca	Adam	29	B	6	3	Erizos	1	2
2014-09-20	4	Mallorca	Adam	29	B	6	3	Erizos	1	6
2014-09-20	4	Mallorca	Adam	29	B	6	3	Erizos	1	6
2014-09-20	4	Mallorca	Adam	29	B	6	3	Esponjas	1	8
2014-09-20	4	Mallorca	Adam	29	B	6	3	Esponjas	1	4
2014-09-21	4	Mallorca	Adam	30	A	1	1	Erizos	1	3
2014-09-21	4	Mallorca	Adam	30	A	1	1	Erizos	1	5
2014-09-21	4	Mallorca	Adam	30	A	1	1	Erizos	1	6
2014-09-21	4	Mallorca	Adam	30	A	1	1	Erizos	1	7
2014-09-21	4	Mallorca	Adam	30	A	1	3	Erizos	1	3
2014-09-21	4	Mallorca	Adam	30	A	1	3	Erizos	1	7
2014-09-21	4	Mallorca	Adam	30	A	1	3	Erizos	1	6
2014-09-21	4	Mallorca	Adam	30	A	1	3	Erizos	1	7
2014-09-21	4	Mallorca	Adam	30	A	1	3	Erizos	1	4
2014-09-21	4	Mallorca	Adam	30	A	1	3	Erizos	1	6
2014-09-21	4	Mallorca	Adam	30	A	1	3	Erizos	1	6
2014-09-21	4	Mallorca	Adam	30	A	2	1	Erizos	1	6
2014-09-21	4	Mallorca	Adam	30	A	2	1	Erizos	1	6
2014-09-21	4	Mallorca	Adam	30	A	2	1	Erizos	1	6
2014-09-21	4	Mallorca	Adam	30	A	2	1	Erizos	1	6
2014-09-21	4	Mallorca	Adam	30	A	2	2	Erizos	1	6
2014-09-21	4	Mallorca	Adam	30	A	2	2	Erizos	1	2
2014-09-21	4	Mallorca	Adam	30	A	3	1	Erizos	1	2
2014-09-21	4	Mallorca	Adam	30	A	3	1	Erizos	1	5
2014-09-21	4	Mallorca	Adam	30	A	3	3	Erizos	1	7
2014-09-21	4	Mallorca	Adam	30	A	3	3	Erizos	1	6
2014-09-21	4	Mallorca	Adam	30	A	3	3	Erizos	1	6
2014-09-21	4	Mallorca	Adam	30	A	3	3	Erizos	1	4
2014-09-21	4	Mallorca	Hilmar	30	B	4	1	Esponjas	1	4.5
2014-09-21	4	Mallorca	Hilmar	30	B	4	2	Erizos	1	2.5
2014-09-21	4	Mallorca	Hilmar	30	B	4	2	Erizos	1	2.5
2014-09-21	4	Mallorca	Hilmar	30	B	4	3	Erizos	1	3.5
2014-09-21	4	Mallorca	Hilmar	30	B	4	3	Erizos	1	3
2014-09-21	4	Mallorca	Hilmar	30	B	4	3	Esponjas	1	6
2014-09-21	4	Mallorca	Hilmar	30	B	5	3	Erizos	1	4
2014-09-21	4	Mallorca	Hilmar	30	B	5	3	Esponjas	1	8
2014-09-21	4	Mallorca	Hilmar	30	B	5	3	Esponjas	1	7
2014-09-21	4	Mallorca	Hilmar	30	B	5	3	Esponjas	1	3.5
2014-09-21	4	Mallorca	Hilmar	30	B	6	3	Erizos	1	5
2014-09-21	4	Mallorca	Hilmar	30	B	6	3	Erizos	1	2.5
2014-09-21	4	Mallorca	Hilmar	30	B	6	3	Erizos	1	3
2014-09-21	4	Mallorca	Hilmar	30	B	6	1	Esponjas	1	11
2014-09-21	4	Mallorca	Hilmar	30	B	6	1	Erizos	1	5.5
2014-09-22	4	Mallorca	Hilmar	31	A	1	1	Erizos	1	1.5
2014-09-22	4	Mallorca	Hilmar	31	A	1	2	Esponjas	1	10
2014-09-22	4	Mallorca	Hilmar	31	A	3	1	Erizos	1	5
2014-09-22	4	Mallorca	Hilmar	31	A	3	1	Erizos	1	5.5
2014-09-22	4	Mallorca	Hilmar	31	A	3	1	Erizos	1	6.5
2014-09-22	4	Mallorca	Hilmar	31	A	3	1	Erizos	1	5
2014-09-22	4	Mallorca	Hilmar	31	A	3	1	Erizos	1	6
2014-09-22	4	Mallorca	Hilmar	31	A	3	1	Erizos	1	7
2014-09-22	4	Mallorca	Hilmar	31	A	3	1	Erizos	1	2
2014-09-22	4	Mallorca	Hilmar	31	A	3	1	Erizos	1	3
2014-09-22	4	Mallorca	Hilmar	31	A	3	1	Esponjas	1	8
2014-09-22	4	Mallorca	Hilmar	31	A	3	3	Esponjas	1	4
2014-09-22	4	Mallorca	Hilmar	31	A	3	3	Erizos	1	6
2014-09-22	4	Mallorca	Hilmar	31	A	3	3	Erizos	1	6.5
2014-09-22	4	Mallorca	Hilmar	31	A	3	3	Erizos	1	2.5
2014-09-22	4	Mallorca	Hilmar	31	A	3	3	Erizos	1	3
2014-09-22	4	Mallorca	Adam	31	B	4	2	Erizos	1	7
2014-09-22	4	Mallorca	Adam	31	B	4	2	Erizos	1	4
2014-09-22	4	Mallorca	Adam	31	B	4	2	Erizos	1	4
2014-09-22	4	Mallorca	Adam	31	B	4	2	Erizos	1	8
2014-09-22	4	Mallorca	Adam	31	B	4	2	Erizos	1	3
2014-09-22	4	Mallorca	Adam	31	B	4	2	Erizos	1	3
2014-09-22	4	Mallorca	Adam	31	B	4	2	Erizos	1	4
2014-09-22	4	Mallorca	Adam	31	B	4	2	Erizos	1	3
2014-09-22	4	Mallorca	Adam	31	B	4	2	Esponjas	1	8
2014-09-22	4	Mallorca	Adam	31	B	4	2	Esponjas	1	7
2014-09-22	4	Mallorca	Adam	31	B	4	2	Esponjas	1	10
2014-09-22	4	Mallorca	Adam	31	B	4	3	Erizos	1	3
2014-09-22	4	Mallorca	Adam	31	B	4	3	Esponjas	1	9
2014-09-22	4	Mallorca	Adam	31	B	5	1	Erizos	1	2
2014-09-22	4	Mallorca	Adam	31	B	5	1	Erizos	1	2
2014-09-22	4	Mallorca	Adam	31	B	5	1	Esponjas	1	11
2014-09-22	4	Mallorca	Adam	31	B	5	1	Esponjas	1	22
2014-09-22	4	Mallorca	Adam	31	B	5	1	Esponjas	1	6
2014-09-22	4	Mallorca	Adam	31	B	5	2	Erizos	1	6
2014-09-22	4	Mallorca	Adam	31	B	5	2	Esponjas	1	8
2014-09-22	4	Mallorca	Adam	31	B	5	3	Erizos	1	2
2014-09-22	4	Mallorca	Adam	31	B	5	3	Erizos	1	4
2014-09-22	4	Mallorca	Adam	31	B	5	3	Erizos	1	5
2014-09-22	4	Mallorca	Adam	31	B	5	3	Erizos	1	5
2014-09-22	4	Mallorca	Adam	31	B	5	3	Erizos	1	5
2014-09-22	4	Mallorca	Adam	31	B	5	3	Erizos	1	7
2014-09-22	4	Mallorca	Adam	31	B	5	3	Erizos	1	7
2014-09-22	4	Mallorca	Adam	31	B	5	3	Erizos	1	3
2014-09-22	4	Mallorca	Adam	31	B	6	1	Erizos	1	2
2014-09-22	4	Mallorca	Adam	31	B	6	1	Erizos	1	2
2014-09-22	4	Mallorca	Adam	31	B	6	1	Esponjas	1	12
2014-09-22	4	Mallorca	Adam	31	B	6	1	Esponjas	1	10
2014-09-22	4	Mallorca	Adam	31	B	6	2	Erizos	1	3
2014-09-22	4	Mallorca	Adam	31	B	6	2	Erizos	1	4
2014-09-22	4	Mallorca	Adam	31	B	6	2	Erizos	1	7
2014-09-22	4	Mallorca	Adam	31	B	6	2	Erizos	1	7
2014-09-22	4	Mallorca	Adam	31	B	6	2	Esponjas	1	10
2014-09-22	4	Mallorca	Adam	31	B	6	2	Esponjas	1	6
2014-09-22	4	Mallorca	Adam	31	B	6	3	Erizos	1	6
2014-09-22	4	Mallorca	Adam	31	B	6	3	Erizos	1	4
2014-09-22	4	Mallorca	Adam	31	B	6	3	Erizos	1	6
2014-09-22	4	Mallorca	Adam	31	B	6	3	Erizos	1	4
2014-09-22	4	Mallorca	Adam	31	B	6	3	Esponjas	1	8
2014-09-22	4	Mallorca	Adam	31	B	6	3	Esponjas	1	10
2014-09-22	4	Mallorca	Adam	31	B	6	3	Esponjas	1	10
2014-09-22	4	Mallorca	Adam	31	B	6	3	Esponjas	1	15
2014-09-22	4	Mallorca	Adam	31	B	6	3	Esponjas	1	9
2014-09-23	4	Mallorca	Adam	32	A	1	1	Esponjas	1	10
2014-09-23	4	Mallorca	Adam	32	A	2	1	Esponjas	1	12
2014-09-23	4	Mallorca	Hilmar	32	B	4	1	Erizos	1	5
2014-09-23	4	Mallorca	Hilmar	32	B	4	1	Esponjas	1	4.5
2014-09-23	4	Mallorca	Hilmar	32	B	4	1	Esponjas	1	2
2014-09-23	4	Mallorca	Hilmar	32	B	4	1	Esponjas	1	5
2014-09-23	4	Mallorca	Hilmar	32	B	4	2	Esponjas	1	3
2014-09-23	4	Mallorca	Hilmar	32	B	4	3	Esponjas	1	5
2014-09-23	4	Mallorca	Hilmar	32	B	5	3	Esponjas	1	4
2014-09-23	4	Mallorca	Hilmar	32	B	6	1	Esponjas	1	5.5
2014-09-23	4	Mallorca	Hilmar	32	B	6	1	Esponjas	1	3
2014-09-23	4	Mallorca	Hilmar	32	B	6	1	Esponjas	1	6
2014-09-23	4	Mallorca	Hilmar	32	B	6	1	Esponjas	1	5
2014-09-23	4	Mallorca	Hilmar	32	B	6	1	Esponjas	1	7
2014-09-23	4	Mallorca	Hilmar	32	B	6	1	Esponjas	1	7
2014-09-23	4	Mallorca	Hilmar	32	B	6	1	Esponjas	1	8
2014-09-23	4	Mallorca	Hilmar	32	B	6	2	Erizos	1	3
41792	1	Mallorca	Hilmar	1	A	1	1	Erizos
41792	1	Mallorca	Hilmar	1	A	1	1	Esponjas
41792	1	Mallorca	Hilmar	1	A	1	2	Erizos
41792	1	Mallorca	Hilmar	1	A	1	2	Esponjas
41792	1	Mallorca	Hilmar	1	A	1	3	Erizos
41792	1	Mallorca	Hilmar	1	A	1	3	Esponjas	1	5.5
41792	1	Mallorca	Hilmar	1	A	2	1	Erizos	1	5
41792	1	Mallorca	Hilmar	1	A	2	1	Erizos	1	2
41792	1	Mallorca	Hilmar	1	A	2	1	Esponjas	1	5.7
41792	1	Mallorca	Hilmar	1	A	2	1	Esponjas	1	7.9
41792	1	Mallorca	Hilmar	1	A	2	2	Erizos
41792	1	Mallorca	Hilmar	1	A	2	2	Esponjas	1	6.8
41792	1	Mallorca	Hilmar	1	A	2	3	Erizos
41792	1	Mallorca	Hilmar	1	A	2	3	Esponjas
41792	1	Mallorca	Hilmar	1	A	3	1	Erizos
41792	1	Mallorca	Hilmar	1	A	3	1	Esponjas
41792	1	Mallorca	Hilmar	1	A	3	2	Erizos
41792	1	Mallorca	Hilmar	1	A	3	2	Esponjas
41792	1	Mallorca	Hilmar	1	A	3	3	Erizos
41792	1	Mallorca	Hilmar	1	A	3	3	Esponjas	1	4.7
41792	1	Mallorca	Hilmar	1	A	3	3	Esponjas	1	5.2
41792	1	Mallorca	Alvaro	2	B	4	1	Erizos	0	0
41792	1	Mallorca	Alvaro	2	B	4	1	Esponjas	1	7
41792	1	Mallorca	Alvaro	2	B	4	2	Erizos
41792	1	Mallorca	Alvaro	2	B	4	2	Esponjas
41792	1	Mallorca	Alvaro	2	B	4	3	Erizos
41792	1	Mallorca	Alvaro	2	B	4	3	Esponjas	1	4.1
41792	1	Mallorca	Alvaro	2	B	5	1	Erizos
41792	1	Mallorca	Alvaro	2	B	5	1	Esponjas	1	6.6
41792	1	Mallorca	Alvaro	2	B	5	2	Erizos
41792	1	Mallorca	Alvaro	2	B	5	2	Esponjas	1	2.7
41792	1	Mallorca	Alvaro	2	B	5	3	Erizos	1	2.9
41792	1	Mallorca	Alvaro	2	B	5	3	Esponjas
41792	1	Mallorca	Alvaro	2	B	6	1	Erizos	1	4.6
41792	1	Mallorca	Alvaro	2	B	6	1	Esponjas
41792	1	Mallorca	Alvaro	2	B	6	2	Erizos
41792	1	Mallorca	Alvaro	2	B	6	2	Esponjas
41792	1	Mallorca	Alvaro	2	B	6	3	Erizos
41792	1	Mallorca	Alvaro	2	B	6	3	Esponjas
41793	1	Mallorca	Hilmar	2	A	1	1	Erizos	1	4
41793	1	Mallorca	Hilmar	2	A	1	1	Erizos	1	2.9
41793	1	Mallorca	Hilmar	2	A	1	1	Esponjas	1	5.7
41793	1	Mallorca	Hilmar	2	A	1	2	Erizos	1	3
41793	1	Mallorca	Hilmar	2	A	1	2	Erizos	1	5.5
41793	1	Mallorca	Hilmar	2	A	1	2	Erizos	1	4.5
41793	1	Mallorca	Hilmar	2	A	1	2	Erizos	1	2.3
41793	1	Mallorca	Hilmar	2	A	1	2	Esponjas	1	6.4
41793	1	Mallorca	Hilmar	2	A	1	2	Esponjas	1	6.5
41793	1	Mallorca	Hilmar	2	A	1	3	Erizos	1	3.8
41793	1	Mallorca	Hilmar	2	A	1	3	Erizos	1	4.6
41793	1	Mallorca	Hilmar	2	A	1	3	Esponjas	1	6
41793	1	Mallorca	Hilmar	2	A	1	3	Esponjas	1	4
41793	1	Mallorca	Hilmar	2	A	2	1	Erizos	1	4.5
41793	1	Mallorca	Hilmar	2	A	2	1	Erizos	1	2.9
41793	1	Mallorca	Hilmar	2	A	2	1	Erizos	1	1.9
41793	1	Mallorca	Hilmar	2	A	2	1	Erizos	1	3
41793	1	Mallorca	Hilmar	2	A	2	1	Erizos	1	1.8
41793	1	Mallorca	Hilmar	2	A	2	1	Esponjas	1	9
41793	1	Mallorca	Hilmar	2	A	2	2	Erizos
41793	1	Mallorca	Hilmar	2	A	2	2	Esponjas
41793	1	Mallorca	Hilmar	2	A	2	3	Erizos	1	3.9
41793	1	Mallorca	Hilmar	2	A	2	3	Esponjas
41793	1	Mallorca	Hilmar	2	A	3	1	Erizos
41793	1	Mallorca	Hilmar	2	A	3	1	Esponjas	1	7
41793	1	Mallorca	Hilmar	2	A	3	1	Esponjas	1	5.8
41793	1	Mallorca	Hilmar	2	A	3	1	Esponjas	1	5
41793	1	Mallorca	Hilmar	2	A	3	2	Erizos	1	2.5
41793	1	Mallorca	Hilmar	2	A	3	2	Erizos	1	3
41793	1	Mallorca	Hilmar	2	A	3	2	Erizos	1	3.6
41793	1	Mallorca	Hilmar	2	A	3	2	Erizos	1	3.4
41793	1	Mallorca	Hilmar	2	A	3	2	Esponjas
41793	1	Mallorca	Hilmar	2	A	3	3	Erizos
41793	1	Mallorca	Hilmar	2	A	3	3	Esponjas
41793	1	Mallorca	Alvaro	2	B	4	1	Erizos
41793	1	Mallorca	Alvaro	2	B	4	1	Esponjas
41793	1	Mallorca	Alvaro	2	B	4	2	Erizos	1	2.3
41793	1	Mallorca	Alvaro	2	B	4	2	Esponjas
41793	1	Mallorca	Alvaro	2	B	4	3	Erizos
41793	1	Mallorca	Alvaro	2	B	4	3	Esponjas
41793	1	Mallorca	Alvaro	2	B	5	1	Erizos
41793	1	Mallorca	Alvaro	2	B	5	1	Esponjas	1	2.7
41793	1	Mallorca	Alvaro	2	B	5	1	Esponjas	1	6.2
41793	1	Mallorca	Alvaro	2	B	5	2	Erizos	1	4.1
41793	1	Mallorca	Alvaro	2	B	5	2	Erizos	1	3.4
41793	1	Mallorca	Alvaro	2	B	5	2	Erizos	1	3.8
41793	1	Mallorca	Alvaro	2	B	5	2	Erizos	1	4.1
41793	1	Mallorca	Alvaro	2	B	5	2	Esponjas	1	6.1
41793	1	Mallorca	Alvaro	2	B	5	2	Esponjas	1	4.8
41793	1	Mallorca	Alvaro	2	B	5	3	Erizos
41793	1	Mallorca	Alvaro	2	B	5	3	Esponjas	1	3.9
41793	1	Mallorca	Alvaro	2	B	6	1	Erizos
41793	1	Mallorca	Alvaro	2	B	6	1	Esponjas
41793	1	Mallorca	Alvaro	2	B	6	2	Erizos
41793	1	Mallorca	Alvaro	2	B	6	2	Esponjas	1	3.4
41793	1	Mallorca	Alvaro	2	B	6	3	Erizos
41793	1	Mallorca	Alvaro	2	B	6	3	Esponjas
41763	1	Mallorca	Hilmar	3	A	1	1	Erizos	1	6
41763	1	Mallorca	Hilmar	3	A	1	1	Erizos	1	6.5
41763	1	Mallorca	Hilmar	3	A	1	1	Erizos	1	3
41763	1	Mallorca	Hilmar	3	A	1	1	Erizos	1	5.5
41763	1	Mallorca	Hilmar	3	A	1	1	Erizos	1	3
41763	1	Mallorca	Hilmar	3	A	1	1	Erizos	1	6
41763	1	Mallorca	Hilmar	3	A	1	1	Erizos	1	4
41763	1	Mallorca	Hilmar	3	A	1	1	Esponjas	1	7
41763	1	Mallorca	Hilmar	3	A	1	2	Erizos
41763	1	Mallorca	Hilmar	3	A	1	2	Esponjas
41763	1	Mallorca	Hilmar	3	A	1	3	Erizos	1	6
41763	1	Mallorca	Hilmar	3	A	1	3	Erizos	1	5
41763	1	Mallorca	Hilmar	3	A	1	3	Erizos	1	5.5
41763	1	Mallorca	Hilmar	3	A	1	3	Erizos	1	4.5
41763	1	Mallorca	Hilmar	3	A	1	3	Erizos	1	2
41763	1	Mallorca	Hilmar	3	A	2	1	Erizos	1	4.6
41763	1	Mallorca	Hilmar	3	A	2	1	Esponjas	1	11
41763	1	Mallorca	Hilmar	3	A	2	1	Esponjas	1	12
41763	1	Mallorca	Hilmar	3	A	2	2	Erizos
41763	1	Mallorca	Hilmar	3	A	2	2	Esponjas
41763	1	Mallorca	Hilmar	3	A	2	3	Erizos	1	3
41763	1	Mallorca	Hilmar	3	A	2	3	Erizos	1	5
41763	1	Mallorca	Hilmar	3	A	2	3	Esponjas	1	7
41763	1	Mallorca	Hilmar	3	A	3	1	Erizos
41763	1	Mallorca	Hilmar	3	A	3	1	Esponjas
41763	1	Mallorca	Hilmar	3	A	3	2	Erizos	0	0
41763	1	Mallorca	Hilmar	3	A	3	2	Esponjas	1	10
41763	1	Mallorca	Hilmar	3	A	3	3	Erizos	1	3.5
41763	1	Mallorca	Hilmar	3	A	3	3	Esponjas
41763	1	Mallorca	Alvaro	3	B	4	1	Erizos
41763	1	Mallorca	Alvaro	3	B	4	1	Esponjas
41763	1	Mallorca	Alvaro	3	B	4	2	Erizos
41763	1	Mallorca	Alvaro	3	B	4	2	Esponjas	1	10.3
41763	1	Mallorca	Alvaro	3	B	4	3	Erizos
41763	1	Mallorca	Alvaro	3	B	4	3	Esponjas	1	11.5
41763	1	Mallorca	Alvaro	3	B	5	1	Erizos
41763	1	Mallorca	Alvaro	3	B	5	1	Esponjas	1	8.2
41763	1	Mallorca	Alvaro	3	B	5	2	Erizos
41763	1	Mallorca	Alvaro	3	B	5	2	Esponjas
41763	1	Mallorca	Alvaro	3	B	5	3	Erizos
41763	1	Mallorca	Alvaro	3	B	5	3	Esponjas
41763	1	Mallorca	Alvaro	3	B	6	1	Erizos	1	7.7
41763	1	Mallorca	Alvaro	3	B	6	1	Erizos	1	8.4
41763	1	Mallorca	Alvaro	3	B	6	1	Erizos	1	6.8
41763	1	Mallorca	Alvaro	3	B	6	1	Erizos	1	6.3
41763	1	Mallorca	Alvaro	3	B	6	1	Esponjas	1	5.2
41763	1	Mallorca	Alvaro	3	B	6	1	Esponjas	1	9.1
41763	1	Mallorca	Alvaro	3	B	6	1	Esponjas	1	10.2
41763	1	Mallorca	Alvaro	3	B	6	2	Erizos	1	6.2
41763	1	Mallorca	Alvaro	3	B	6	2	Esponjas	1	5.6
41763	1	Mallorca	Alvaro	3	B	6	3	Erizos	1	5.8
41763	1	Mallorca	Alvaro	3	B	6	3	Erizos	1	3.4
41763	1	Mallorca	Alvaro	3	B	6	3	Esponjas
41795	1	Mallorca	Alvaro	4	B	4	1	Erizos
41795	1	Mallorca	Alvaro	4	B	4	1	Esponjas	1	9.1
41795	1	Mallorca	Alvaro	4	B	4	1	Esponjas	1	3.3
41795	1	Mallorca	Alvaro	4	B	4	2	Erizos
41795	1	Mallorca	Alvaro	4	B	4	2	Esponjas	1	3.6
41795	1	Mallorca	Alvaro	4	B	4	3	Erizos
41795	1	Mallorca	Alvaro	4	B	4	3	Esponjas
41795	1	Mallorca	Alvaro	4	B	5	1	Erizos
41795	1	Mallorca	Alvaro	4	B	5	1	Esponjas	1	7.1
41795	1	Mallorca	Alvaro	4	B	5	1	Esponjas	1	5.6
41795	1	Mallorca	Alvaro	4	B	5	1	Esponjas	1	7.3
41795	1	Mallorca	Alvaro	4	B	5	2	Erizos
41795	1	Mallorca	Alvaro	4	B	5	2	Esponjas
41795	1	Mallorca	Alvaro	4	B	5	3	Erizos
41795	1	Mallorca	Alvaro	4	B	5	3	Esponjas
41795	1	Mallorca	Alvaro	4	B	6	1	Erizos
41795	1	Mallorca	Alvaro	4	B	6	1	Esponjas
41795	1	Mallorca	Alvaro	4	B	6	2	Erizos
41795	1	Mallorca	Alvaro	4	B	6	2	Esponjas	1	7.6
41795	1	Mallorca	Alvaro	4	B	6	2	Esponjas	1	5.5
41795	1	Mallorca	Alvaro	4	B	6	2	Esponjas	1	7.3
41795	1	Mallorca	Alvaro	4	B	6	3	Erizos	1	4.3
41795	1	Mallorca	Alvaro	4	B	6	3	Esponjas	1	10.8
41795	1	Mallorca	Alvaro	4	B	6	3	Esponjas	1	8.4
41795	1	Mallorca	Alvaro	4	B	6	3	Esponjas	1	6.7
41795	1	Mallorca	Hilmar	4	A	1	1	Erizos
41795	1	Mallorca	Hilmar	4	A	1	1	Esponjas	1	6.2
41795	1	Mallorca	Hilmar	4	A	1	1	Esponjas	1	12.5
41795	1	Mallorca	Hilmar	4	A	1	2	Erizos
41795	1	Mallorca	Hilmar	4	A	1	2	Esponjas	1	9.5
41795	1	Mallorca	Hilmar	4	A	1	2	Esponjas	1	7.9
41795	1	Mallorca	Hilmar	4	A	1	3	Erizos
41795	1	Mallorca	Hilmar	4	A	1	3	Esponjas	1	8.4
41795	1	Mallorca	Hilmar	4	A	1	3	Esponjas	1	7.3
41795	1	Mallorca	Hilmar	4	A	2	1	Erizos
41795	1	Mallorca	Hilmar	4	A	2	1	Esponjas	1	8.2
41795	1	Mallorca	Hilmar	4	A	2	2	Erizos
41795	1	Mallorca	Hilmar	4	A	2	2	Esponjas	1	3.2
41795	1	Mallorca	Hilmar	4	A	2	2	Esponjas	1	5.3
41795	1	Mallorca	Hilmar	4	A	2	3	Erizos	1	3.5
41795	1	Mallorca	Hilmar	4	A	2	3	Esponjas	1	7.5
41795	1	Mallorca	Hilmar	4	A	2	3	Esponjas	1	4
41795	1	Mallorca	Hilmar	4	A	2	3	Esponjas	1	9.6
41795	1	Mallorca	Hilmar	4	A	3	1	Erizos
41795	1	Mallorca	Hilmar	4	A	3	1	Esponjas	1	5
41795	1	Mallorca	Hilmar	4	A	3	1	Esponjas	1	7.5
41795	1	Mallorca	Hilmar	4	A	3	2	Erizos
41795	1	Mallorca	Hilmar	4	A	3	2	Esponjas	1	6
41795	1	Mallorca	Hilmar	4	A	3	3	Erizos
41795	1	Mallorca	Hilmar	4	A	3	3	Esponjas	1	5
41796	1	Mallorca	Hilmar	5	A	1	1	Erizos
41796	1	Mallorca	Hilmar	5	A	1	1	Esponjas
41796	1	Mallorca	Hilmar	5	A	1	2	Erizos	1	2.5
41796	1	Mallorca	Hilmar	5	A	1	2	Esponjas	1	6.5
41796	1	Mallorca	Hilmar	5	A	1	3	Erizos
41796	1	Mallorca	Hilmar	5	A	1	3	Esponjas
41796	1	Mallorca	Hilmar	5	A	2	1	Erizos
41796	1	Mallorca	Hilmar	5	A	2	1	Esponjas
41796	1	Mallorca	Hilmar	5	A	2	2	Erizos
41796	1	Mallorca	Hilmar	5	A	2	2	Esponjas	1	7.7
41796	1	Mallorca	Hilmar	5	A	2	3	Erizos	0	0
41796	1	Mallorca	Hilmar	5	A	2	3	Esponjas	0	0
41796	1	Mallorca	Hilmar	5	A	3	1	Erizos	0	0
41796	1	Mallorca	Hilmar	5	A	3	1	Esponjas	1	10
41796	1	Mallorca	Hilmar	5	A	3	2	Erizos	0	0
41796	1	Mallorca	Hilmar	5	A	3	2	Esponjas	1	18
41796	1	Mallorca	Hilmar	5	A	3	3	Erizos	0	0
41796	1	Mallorca	Hilmar	5	A	3	3	Esponjas	1	7.7
41796	1	Mallorca	Alvaro	5	B	4	1	Erizos	0	0
41796	1	Mallorca	Alvaro	5	B	4	1	Esponjas	0	0
41796	1	Mallorca	Alvaro	5	B	4	2	Erizos	0	0
41796	1	Mallorca	Alvaro	5	B	4	2	Esponjas	1	5.3
41796	1	Mallorca	Alvaro	5	B	4	2	Esponjas	1	4.7
41796	1	Mallorca	Alvaro	5	B	4	3	Erizos	0	0
41796	1	Mallorca	Alvaro	5	B	4	3	Esponjas	0	0
41796	1	Mallorca	Alvaro	5	B	5	1	Erizos	0	0
41796	1	Mallorca	Alvaro	5	B	5	1	Esponjas	1	4.5
41796	1	Mallorca	Alvaro	5	B	5	2	Erizos	0	0
41796	1	Mallorca	Alvaro	5	B	5	2	Esponjas	1	4.9
41796	1	Mallorca	Alvaro	5	B	5	2	Esponjas	1	5.3
41796	1	Mallorca	Alvaro	5	B	5	3	Erizos	0	0
41796	1	Mallorca	Alvaro	5	B	5	3	Esponjas	0	0
41796	1	Mallorca	Alvaro	5	B	6	1	Erizos	0	0
41796	1	Mallorca	Alvaro	5	B	6	1	Esponjas	0	0
41796	1	Mallorca	Alvaro	5	B	6	2	Erizos	0	0
41796	1	Mallorca	Alvaro	5	B	6	2	Esponjas	0	0
41796	1	Mallorca	Alvaro	5	B	6	3	Erizos	0	0
41796	1	Mallorca	Alvaro	5	B	6	3	Esponjas	0	0
41797	1	Mallorca	Hilmar	6	A	1	1	Erizos	0	0
41797	1	Mallorca	Hilmar	6	A	1	1	Esponjas	1	7.2
41797	1	Mallorca	Hilmar	6	A	1	2	Erizos	1	4.7
41797	1	Mallorca	Hilmar	6	A	1	2	Esponjas	0	0
41797	1	Mallorca	Hilmar	6	A	1	3	Erizos	0	0
41797	1	Mallorca	Hilmar	6	A	1	3	Esponjas	0	0
41797	1	Mallorca	Hilmar	6	A	2	1	Erizos	0	0
41797	1	Mallorca	Hilmar	6	A	2	1	Esponjas	0	0
41797	1	Mallorca	Hilmar	6	A	2	2	Erizos	0	0
41797	1	Mallorca	Hilmar	6	A	2	2	Esponjas	1	4.5
41797	1	Mallorca	Hilmar	6	A	2	3	Erizos	1	5.2
41797	1	Mallorca	Hilmar	6	A	2	3	Erizos	1	6
41797	1	Mallorca	Hilmar	6	A	2	3	Erizos	1	5.3
41797	1	Mallorca	Hilmar	6	A	2	3	Esponjas	0	0
41797	1	Mallorca	Hilmar	6	A	3	1	Erizos	1	5.3
41797	1	Mallorca	Hilmar	6	A	3	1	Esponjas	0	0
41797	1	Mallorca	Hilmar	6	A	3	2	Erizos	1	4.5
41797	1	Mallorca	Hilmar	6	A	3	2	Esponjas	0	0
41797	1	Mallorca	Hilmar	6	A	3	3	Erizos	1	3.7
41797	1	Mallorca	Hilmar	6	A	3	3	Erizos	1	2.5
41797	1	Mallorca	Hilmar	6	A	3	3	Erizos	1	3.1
41797	1	Mallorca	Hilmar	6	A	3	3	Erizos	1	6.2
41797	1	Mallorca	Hilmar	6	A	3	3	Erizos	1	5.8
41797	1	Mallorca	Hilmar	6	A	3	3	Esponjas	1	9.6
41797	1	Mallorca	Alvaro	6	B	4	1	Erizos	0	0
41797	1	Mallorca	Alvaro	6	B	4	1	Esponjas	0	0
41797	1	Mallorca	Alvaro	6	B	4	2	Erizos	1	5.6
41797	1	Mallorca	Alvaro	6	B	4	2	Esponjas	0	0
41797	1	Mallorca	Alvaro	6	B	4	3	Erizos	0	0
41797	1	Mallorca	Alvaro	6	B	4	3	Esponjas	0	0
41797	1	Mallorca	Alvaro	6	B	5	1	Erizos	0	0
41797	1	Mallorca	Alvaro	6	B	5	1	Esponjas	0	0
41797	1	Mallorca	Alvaro	6	B	5	2	Erizos	0	0
41797	1	Mallorca	Alvaro	6	B	5	2	Esponjas	0	0
41797	1	Mallorca	Alvaro	6	B	5	3	Erizos	0	0
41797	1	Mallorca	Alvaro	6	B	5	3	Esponjas	0	0
41797	1	Mallorca	Alvaro	6	B	6	1	Erizos	0	0
41797	1	Mallorca	Alvaro	6	B	6	1	Esponjas	0	0
41797	1	Mallorca	Alvaro	6	B	6	2	Erizos	0	0
41797	1	Mallorca	Alvaro	6	B	6	2	Esponjas	0	0
41797	1	Mallorca	Alvaro	6	B	6	3	Erizos	1	4.6
41797	1	Mallorca	Alvaro	6	B	6	3	Esponjas	0	0
41798	1	Mallorca	Hilmar	7	A	1	1	Erizos	0	0
41798	1	Mallorca	Hilmar	7	A	1	1	Esponjas	0	0
41798	1	Mallorca	Hilmar	7	A	1	2	Erizos	0	0
41798	1	Mallorca	Hilmar	7	A	1	2	Esponjas	0	0
41798	1	Mallorca	Hilmar	7	A	1	3	Erizos	0	0
41798	1	Mallorca	Hilmar	7	A	1	3	Esponjas	0	0
41798	1	Mallorca	Hilmar	7	A	2	1	Erizos	0	0
41798	1	Mallorca	Hilmar	7	A	2	1	Esponjas	0	0
41798	1	Mallorca	Hilmar	7	A	2	2	Erizos	0	0
41798	1	Mallorca	Hilmar	7	A	2	2	Esponjas	0	0
41798	1	Mallorca	Hilmar	7	A	2	3	Erizos	0	0
41798	1	Mallorca	Hilmar	7	A	2	3	Esponjas	0	0
41798	1	Mallorca	Hilmar	7	A	3	1	Erizos	0	0
41798	1	Mallorca	Hilmar	7	A	3	1	Esponjas	0	0
41798	1	Mallorca	Hilmar	7	A	3	2	Erizos	0	0
41798	1	Mallorca	Hilmar	7	A	3	2	Esponjas	0	0
41798	1	Mallorca	Hilmar	7	A	3	3	Erizos	0	0
41798	1	Mallorca	Hilmar	7	A	3	3	Esponjas	0	0
41798	1	Mallorca	Alvaro	7	B	4	1	Erizos	0	0
41798	1	Mallorca	Alvaro	7	B	4	1	Esponjas	1	4.9
41798	1	Mallorca	Alvaro	7	B	4	1	Esponjas	1	10.1
41798	1	Mallorca	Alvaro	7	B	4	1	Esponjas	1	5.2
41798	1	Mallorca	Alvaro	7	B	4	1	Esponjas	1	5.7
41798	1	Mallorca	Alvaro	7	B	4	1	Esponjas	1	3.7
41798	1	Mallorca	Alvaro	7	B	4	1	Esponjas	1	6.1
41798	1	Mallorca	Alvaro	7	B	4	2	Erizos	1	1.1
41798	1	Mallorca	Alvaro	7	B	4	2	Erizos	1	4.3
41798	1	Mallorca	Alvaro	7	B	4	2	Esponjas	1	6.7
41798	1	Mallorca	Alvaro	7	B	4	3	Erizos	0	0
41798	1	Mallorca	Alvaro	7	B	4	3	Esponjas	0	0
41798	1	Mallorca	Alvaro	7	B	5	1	Erizos	1	4.3
41798	1	Mallorca	Alvaro	7	B	5	1	Esponjas	1	6.3
41798	1	Mallorca	Alvaro	7	B	5	1	Esponjas	1	7.2
41798	1	Mallorca	Alvaro	7	B	5	2	Erizos	0	0
41798	1	Mallorca	Alvaro	7	B	5	2	Esponjas	1	3.5
41798	1	Mallorca	Alvaro	7	B	5	3	Erizos	0	0
41798	1	Mallorca	Alvaro	7	B	5	3	Esponjas	1	14.4
41798	1	Mallorca	Alvaro	7	B	6	1	Erizos	0	0
41798	1	Mallorca	Alvaro	7	B	6	1	Esponjas	0	0
41798	1	Mallorca	Alvaro	7	B	6	2	Erizos	0	0
41798	1	Mallorca	Alvaro	7	B	6	2	Esponjas	1	9.1
41798	1	Mallorca	Alvaro	7	B	6	3	Erizos	1	2.7
41798	1	Mallorca	Alvaro	7	B	6	3	Esponjas	1	2.6
41799	1	Mallorca	Hilmar	8	A	1	1	Erizos	0	0
41799	1	Mallorca	Hilmar	8	A	1	1	Esponjas	1	10.5
41799	1	Mallorca	Hilmar	8	A	1	2	Erizos	1	6.1
41799	1	Mallorca	Hilmar	8	A	1	2	Esponjas	0	0
41799	1	Mallorca	Hilmar	8	A	1	3	Erizos	1	6
41799	1	Mallorca	Hilmar	8	A	1	3	Erizos	1	5.5
41799	1	Mallorca	Hilmar	8	A	1	3	Erizos	1	4
41799	1	Mallorca	Hilmar	8	A	1	3	Erizos	1	6
41799	1	Mallorca	Hilmar	8	A	1	3	Erizos	1	5
41799	1	Mallorca	Hilmar	8	A	1	3	Erizos	1	5.5
41799	1	Mallorca	Hilmar	8	A	1	3	Erizos	1	3
41799	1	Mallorca	Hilmar	8	A	1	3	Esponjas	1	2
41799	1	Mallorca	Hilmar	8	A	2	1	Erizos	1	2.5
41799	1	Mallorca	Hilmar	8	A	2	1	Esponjas	0	0
41799	1	Mallorca	Hilmar	8	A	2	2	Erizos	0	0
41799	1	Mallorca	Hilmar	8	A	2	2	Esponjas	0	0
41799	1	Mallorca	Hilmar	8	A	2	3	Erizos	0	0
41799	1	Mallorca	Hilmar	8	A	2	3	Esponjas	0	0
41799	1	Mallorca	Hilmar	8	A	3	1	Erizos	1	5.5
41799	1	Mallorca	Hilmar	8	A	3	1	Esponjas	0	0
41799	1	Mallorca	Hilmar	8	A	3	2	Erizos	0	0
41799	1	Mallorca	Hilmar	8	A	3	2	Esponjas	1	3
41799	1	Mallorca	Hilmar	8	A	3	3	Erizos	0	0
41799	1	Mallorca	Hilmar	8	A	3	3	Esponjas	0	0
41799	1	Mallorca	Hilmar	8	B	4	1	Erizos	1	5.6
41799	1	Mallorca	Hilmar	8	B	4	1	Esponjas	1	6.8
41799	1	Mallorca	Hilmar	8	B	4	2	Erizos	0	0
41799	1	Mallorca	Hilmar	8	B	4	2	Esponjas	0	0
41799	1	Mallorca	Hilmar	8	B	4	3	Erizos	0	0
41799	1	Mallorca	Hilmar	8	B	4	3	Esponjas	0	0
41799	1	Mallorca	Hilmar	8	B	5	1	Erizos	0	0
41799	1	Mallorca	Hilmar	8	B	5	1	Esponjas	1	6.2
41799	1	Mallorca	Hilmar	8	B	5	2	Erizos	0	0
41799	1	Mallorca	Hilmar	8	B	5	2	Esponjas	0	0
41799	1	Mallorca	Hilmar	8	B	5	3	Erizos	0	0
41799	1	Mallorca	Hilmar	8	B	5	3	Esponjas	0	0
41799	1	Mallorca	Hilmar	8	B	6	1	Erizos	1	5.6
41799	1	Mallorca	Hilmar	8	B	6	1	Esponjas	0	0
41799	1	Mallorca	Hilmar	8	B	6	2	Erizos	1	5.5
41799	1	Mallorca	Hilmar	8	B	6	2	Esponjas	0	0
41799	1	Mallorca	Hilmar	8	B	6	3	Erizos	1	5.2
41799	1	Mallorca	Hilmar	8	B	6	3	Erizos	1	5.8
41799	1	Mallorca	Hilmar	8	B	6	3	Esponjas	1	5.5
41814	2	Menorca	Johnson	9	B	4	1	Erizos	1	7
41814	2	Menorca	Johnson	9	B	4	1	Esponjas	0	0
41814	2	Menorca	Johnson	9	B	4	2	Erizos	0	0
41814	2	Menorca	Johnson	9	B	4	2	Esponjas	0	0
41814	2	Menorca	Johnson	9	B	4	3	Erizos	0	0
41814	2	Menorca	Johnson	9	B	4	3	Esponjas	0	0
41814	2	Menorca	Johnson	9	B	5	1	Erizos	0	0
41814	2	Menorca	Johnson	9	B	5	1	Esponjas	0	0
41814	2	Menorca	Johnson	9	B	5	2	Erizos	0	0
41814	2	Menorca	Johnson	9	B	5	2	Esponjas	0	0
41814	2	Menorca	Johnson	9	B	5	3	Erizos	0	0
41814	2	Menorca	Johnson	9	B	5	3	Esponjas	1	12
41814	2	Menorca	Hilmar	9	A	1	1	Erizos	1	6.6
41814	2	Menorca	Hilmar	9	A	1	1	Erizos	1	4
41814	2	Menorca	Hilmar	9	A	1	1	Erizos	1	3.2
41814	2	Menorca	Hilmar	9	A	1	1	Erizos	1	8.7
41814	2	Menorca	Hilmar	9	A	1	1	Esponjas	1	5.5
41814	2	Menorca	Hilmar	9	A	1	1	Esponjas	1	6.9
41814	2	Menorca	Hilmar	9	A	1	1	Esponjas	1	5.9
41814	2	Menorca	Hilmar	9	A	1	1	Esponjas	1	3
41814	2	Menorca	Hilmar	9	A	1	1	Esponjas	1	5.8
41814	2	Menorca	Hilmar	9	A	1	2	Erizos	1	1.9
41814	2	Menorca	Hilmar	9	A	1	2	Erizos	1	5.6
41814	2	Menorca	Hilmar	9	A	1	2	Esponjas	0	0
41814	2	Menorca	Hilmar	9	A	1	3	Erizos	1	5.6
41814	2	Menorca	Hilmar	9	A	1	3	Esponjas	0	0
41814	2	Menorca	Hilmar	9	A	2	1	Erizos	1	5.3
41814	2	Menorca	Hilmar	9	A	2	1	Erizos	1	2
41814	2	Menorca	Hilmar	9	A	2	1	Erizos	1	3.2
41814	2	Menorca	Hilmar	9	A	2	1	Esponjas	0	0
41814	2	Menorca	Hilmar	9	A	2	2	Erizos	1	6.2
41814	2	Menorca	Hilmar	9	A	2	2	Erizos	1	5.8
41814	2	Menorca	Hilmar	9	A	2	2	Esponjas	0	0
41814	2	Menorca	Hilmar	9	A	2	3	Erizos	0	0
41814	2	Menorca	Hilmar	9	A	2	3	Esponjas	0	0
41814	2	Menorca	Hilmar	9	A	3	1	Erizos	1	5.7
41814	2	Menorca	Hilmar	9	A	3	1	Esponjas	1	4.6
41814	2	Menorca	Hilmar	9	A	3	1	Esponjas	1	7.3
41814	2	Menorca	Hilmar	9	A	3	2	Erizos	0	0
41814	2	Menorca	Hilmar	9	A	3	2	Esponjas	1	5.5
41814	2	Menorca	Hilmar	9	A	3	3	Erizos	1	5.5
41814	2	Menorca	Hilmar	9	A	3	3	Esponjas	0	0
41815	2	Menorca	Hilmar	10	A	1	1	Erizos	0	0
41815	2	Menorca	Hilmar	10	A	1	1	Esponjas	1	6.8
41815	2	Menorca	Hilmar	10	A	1	2	Erizos	0	0
41815	2	Menorca	Hilmar	10	A	1	2	Esponjas	1	6.2
41815	2	Menorca	Hilmar	10	A	1	3	Erizos	0	0
41815	2	Menorca	Hilmar	10	A	1	3	Esponjas	1	4.2
41815	2	Menorca	Hilmar	10	A	2	1	Erizos	0	0
41815	2	Menorca	Hilmar	10	A	2	1	Esponjas	0	0
41815	2	Menorca	Hilmar	10	A	2	2	Erizos	0	0
41815	2	Menorca	Hilmar	10	A	2	2	Esponjas	0	0
41815	2	Menorca	Hilmar	10	A	2	3	Erizos	0	0
41815	2	Menorca	Hilmar	10	A	2	3	Esponjas	0	0
41815	2	Menorca	Hilmar	10	A	3	1	Erizos	1	4.7
41815	2	Menorca	Hilmar	10	A	3	1	Erizos	1	6
41815	2	Menorca	Hilmar	10	A	3	1	Erizos	1	7.2
41815	2	Menorca	Hilmar	10	A	3	1	Esponjas	0	0
41815	2	Menorca	Hilmar	10	A	3	2	Erizos	1	5.9
41815	2	Menorca	Hilmar	10	A	3	2	Erizos	1	5.2
41815	2	Menorca	Hilmar	10	A	3	2	Erizos	1	4.9
41815	2	Menorca	Hilmar	10	A	3	2	Esponjas	1	6.7
41815	2	Menorca	Hilmar	10	A	3	2	Esponjas	1	4.3
41815	2	Menorca	Hilmar	10	A	3	3	Erizos	0	0
41815	2	Menorca	Hilmar	10	A	3	3	Esponjas	0	0
41815	2	Menorca	Johnson	10	B	4	1	Erizos	1	7.1
41815	2	Menorca	Johnson	10	B	4	1	Erizos	1	6
41815	2	Menorca	Johnson	10	B	4	1	Erizos	1	7
41815	2	Menorca	Johnson	10	B	4	1	Esponjas	1	6
41815	2	Menorca	Johnson	10	B	4	2	Erizos	1	7.1
41815	2	Menorca	Johnson	10	B	4	2	Erizos	1	4
41815	2	Menorca	Johnson	10	B	4	2	Erizos	1	5
41815	2	Menorca	Johnson	10	B	4	2	Esponjas	1	7
41815	2	Menorca	Johnson	10	B	4	3	Erizos	0	0
41815	2	Menorca	Johnson	10	B	4	3	Esponjas	1	11
41815	2	Menorca	Johnson	10	B	5	1	Erizos	0	0
41815	2	Menorca	Johnson	10	B	5	1	Esponjas	1	2
41815	2	Menorca	Johnson	10	B	5	2	Erizos	0	0
41815	2	Menorca	Johnson	10	B	5	2	Esponjas	1	7
41815	2	Menorca	Johnson	10	B	5	3	Erizos	0	0
41815	2	Menorca	Johnson	10	B	5	3	Esponjas	0	0
41815	2	Menorca	Johnson	10	B	6	1	Erizos	0	0
41815	2	Menorca	Johnson	10	B	6	1	Esponjas	1	6
41815	2	Menorca	Johnson	10	B	6	2	Erizos	0	0
41815	2	Menorca	Johnson	10	B	6	2	Esponjas	1	6
41815	2	Menorca	Johnson	10	B	6	2	Esponjas	1	2
41815	2	Menorca	Johnson	10	B	6	2	Esponjas	1	6
41815	2	Menorca	Johnson	10	B	6	3	Erizos	0	0
41815	2	Menorca	Johnson	10	B	6	3	Esponjas	1	5
41815	2	Menorca	Johnson	10	B	6	3	Esponjas	1	14
41816	2	Menorca	Hilmar	11	A	1	1	Erizos	0	0
41816	2	Menorca	Hilmar	11	A	1	1	Esponjas	0	0
41816	2	Menorca	Hilmar	11	A	1	2	Erizos	1	6.3
41816	2	Menorca	Hilmar	11	A	1	2	Erizos	1	6.4
41816	2	Menorca	Hilmar	11	A	1	2	Esponjas	0	0
41816	2	Menorca	Hilmar	11	A	1	3	Erizos	0	0
41816	2	Menorca	Hilmar	11	A	1	3	Esponjas	0	0
41816	2	Menorca	Hilmar	11	A	2	1	Erizos	1	4.4
41816	2	Menorca	Hilmar	11	A	2	1	Erizos	1	6.3
41816	2	Menorca	Hilmar	11	A	2	1	Erizos	1	3.3
41816	2	Menorca	Hilmar	11	A	2	1	Erizos	1	4.6
41816	2	Menorca	Hilmar	11	A	2	2	Erizos	0	0
41816	2	Menorca	Hilmar	11	A	2	2	Esponjas	0	0
41816	2	Menorca	Hilmar	11	A	2	3	Erizos	0	0
41816	2	Menorca	Hilmar	11	A	2	3	Esponjas	0	0
41816	2	Menorca	Hilmar	11	A	3	1	Erizos	0	0
41816	2	Menorca	Hilmar	11	A	3	1	Esponjas	0	0
41816	2	Menorca	Hilmar	11	A	3	2	Erizos	0	0
41816	2	Menorca	Hilmar	11	A	3	2	Esponjas	1	5.5
41816	2	Menorca	Hilmar	11	A	3	3	Erizos	0	0
41816	2	Menorca	Hilmar	11	A	3	3	Esponjas	0	0
41816	2	Menorca	Johnson	11	B	4	1	Erizos	1	4
41816	2	Menorca	Johnson	11	B	4	1	Erizos	1	5.5
41816	2	Menorca	Johnson	11	B	4	1	Erizos	1	6
41816	2	Menorca	Johnson	11	B	4	1	Esponjas	1	6
41816	2	Menorca	Johnson	11	B	4	1	Esponjas	1	4
41816	2	Menorca	Johnson	11	B	4	1	Esponjas	1	5
41816	2	Menorca	Johnson	11	B	4	1	Esponjas	1	20
41816	2	Menorca	Johnson	11	B	4	1	Esponjas	1	6
41816	2	Menorca	Johnson	11	B	4	2	Erizos	1	3.2
41816	2	Menorca	Johnson	11	B	4	2	Esponjas	1	4.5
41816	2	Menorca	Johnson	11	B	4	3	Erizos	1	6
41816	2	Menorca	Johnson	11	B	4	3	Erizos	1	7
41816	2	Menorca	Johnson	11	B	4	3	Erizos	1	6.5
41816	2	Menorca	Johnson	11	B	4	3	Erizos	1	4
41816	2	Menorca	Johnson	11	B	4	3	Erizos	1	3.2
41816	2	Menorca	Johnson	11	B	4	3	Erizos	1	3.1
41816	2	Menorca	Johnson	11	B	4	3	Erizos	1	6.4
41816	2	Menorca	Johnson	11	B	4	3	Erizos	1	6
41816	2	Menorca	Johnson	11	B	4	3	Erizos	1	5
41816	2	Menorca	Johnson	11	B	4	3	Esponjas	1	4
41816	2	Menorca	Johnson	11	B	5	1	Erizos	1	4.5
41816	2	Menorca	Johnson	11	B	5	1	Erizos	1	4.2
41816	2	Menorca	Johnson	11	B	5	1	Erizos	1	5.2
41816	2	Menorca	Johnson	11	B	5	1	Esponjas	1	8
41816	2	Menorca	Johnson	11	B	5	2	Erizos	1	5.8
41816	2	Menorca	Johnson	11	B	5	2	Erizos	1	7
41816	2	Menorca	Johnson	11	B	5	2	Erizos	1	7
41816	2	Menorca	Johnson	11	B	5	2	Erizos	1	6.2
41816	2	Menorca	Johnson	11	B	5	2	Esponjas	1	4
41816	2	Menorca	Johnson	11	B	5	2	Esponjas	1	4
41816	2	Menorca	Johnson	11	B	5	2	Esponjas	1	5
41816	2	Menorca	Johnson	11	B	5	2	Esponjas	1	4
41816	2	Menorca	Johnson	11	B	5	2	Esponjas	1	5
41816	2	Menorca	Johnson	11	B	5	3	Erizos	1	6.8
41816	2	Menorca	Johnson	11	B	5	3	Erizos	1	7
41816	2	Menorca	Johnson	11	B	5	3	Erizos	1	5.5
41816	2	Menorca	Johnson	11	B	5	3	Erizos	1	4
41816	2	Menorca	Johnson	11	B	5	3	Erizos	1	5
41816	2	Menorca	Johnson	11	B	5	3	Erizos	1	2.3
41816	2	Menorca	Johnson	11	B	5	3	Erizos	1	2.5
41816	2	Menorca	Johnson	11	B	5	3	Erizos	1	4
41816	2	Menorca	Johnson	11	B	5	3	Esponjas	1	2
41816	2	Menorca	Johnson	11	B	5	3	Esponjas	1	7
41816	2	Menorca	Johnson	11	B	5	3	Esponjas	1	7.1
41816	2	Menorca	Johnson	11	B	6	1	Erizos	1	4.5
41816	2	Menorca	Johnson	11	B	6	1	Erizos	1	4
41816	2	Menorca	Johnson	11	B	6	1	Erizos	1	5.6
41816	2	Menorca	Johnson	11	B	6	1	Erizos	1	5.2
41816	2	Menorca	Johnson	11	B	6	1	Esponjas	0	0
41816	2	Menorca	Johnson	11	B	6	2	Erizos	1	5.1
41816	2	Menorca	Johnson	11	B	6	2	Erizos	1	5
41816	2	Menorca	Johnson	11	B	6	2	Erizos	1	7
41816	2	Menorca	Johnson	11	B	6	2	Erizos	1	4.2
41816	2	Menorca	Johnson	11	B	6	2	Erizos	1	5.6
41816	2	Menorca	Johnson	11	B	6	2	Esponjas	1	9.1
41816	2	Menorca	Johnson	11	B	6	2	Esponjas	1	5.2
41816	2	Menorca	Johnson	11	B	6	3	Erizos	1	7.1
41816	2	Menorca	Johnson	11	B	6	3	Erizos	1	5
41816	2	Menorca	Johnson	11	B	6	3	Erizos	1	6
41816	2	Menorca	Johnson	11	B	6	3	Esponjas	1	3
41816	2	Menorca	Johnson	11	B	6	3	Esponjas	1	4
41816	2	Menorca	Johnson	11	B	6	3	Esponjas	1	4.5
41816	2	Menorca	Johnson	11	B	6	3	Esponjas	1	2
41817	2	Menorca	Hilmar	12	A	1	1	Erizos	0	0
41817	2	Menorca	Hilmar	12	A	1	1	Esponjas	1	4.6
41817	2	Menorca	Hilmar	12	A	1	2	Erizos	0	0
41817	2	Menorca	Hilmar	12	A	1	2	Esponjas	0	0
41817	2	Menorca	Hilmar	12	A	1	3	Erizos	0	0
41817	2	Menorca	Hilmar	12	A	1	3	Esponjas	0	0
41817	2	Menorca	Hilmar	12	A	2	1	Erizos	0	0
41817	2	Menorca	Hilmar	12	A	2	1	Esponjas	0	0
41817	2	Menorca	Hilmar	12	A	2	2	Erizos	0	0
41817	2	Menorca	Hilmar	12	A	2	2	Esponjas	0	0
41817	2	Menorca	Hilmar	12	A	2	3	Erizos	0	0
41817	2	Menorca	Hilmar	12	A	2	3	Esponjas	0	0
41817	2	Menorca	Hilmar	12	A	3	1	Erizos	0	0
41817	2	Menorca	Hilmar	12	A	3	1	Esponjas	0	0
41817	2	Menorca	Hilmar	12	A	3	2	Erizos	0	0
41817	2	Menorca	Hilmar	12	A	3	2	Esponjas	1	8.2
41817	2	Menorca	Hilmar	12	A	3	3	Erizos	0	0
41817	2	Menorca	Hilmar	12	A	3	3	Esponjas	0	0
41817	2	Menorca	Hilmar	12	B	4	1	Erizos	0	0
41817	2	Menorca	Hilmar	12	B	4	1	Esponjas	0	0
41817	2	Menorca	Hilmar	12	B	4	2	Erizos	0	0
41817	2	Menorca	Hilmar	12	B	4	2	Esponjas	0	0
41817	2	Menorca	Hilmar	12	B	4	3	Erizos	0	0
41817	2	Menorca	Hilmar	12	B	4	3	Esponjas	0	0
41817	2	Menorca	Hilmar	12	B	5	1	Erizos	0	0
41817	2	Menorca	Hilmar	12	B	5	1	Esponjas	0	0
41817	2	Menorca	Hilmar	12	B	5	2	Erizos	0	0
41817	2	Menorca	Hilmar	12	B	5	2	Esponjas	0	0
41817	2	Menorca	Hilmar	12	B	5	3	Erizos	0	0
41817	2	Menorca	Hilmar	12	B	5	3	Esponjas	0	0
41817	2	Menorca	Hilmar	12	B	6	1	Erizos	0	0
41817	2	Menorca	Hilmar	12	B	6	1	Esponjas	0	0
41817	2	Menorca	Hilmar	12	B	6	2	Erizos	0	0
41817	2	Menorca	Hilmar	12	B	6	2	Esponjas	0	0
41817	2	Menorca	Hilmar	12	B	6	3	Erizos	0	0
41817	2	Menorca	Hilmar	12	B	6	3	Esponjas	0	0
41818	2	Menorca	Hilmar	13	A	1	1	Erizos	0	0
41818	2	Menorca	Hilmar	13	A	1	1	Esponjas	0	0
41818	2	Menorca	Hilmar	13	A	1	2	Erizos	0	0
41818	2	Menorca	Hilmar	13	A	1	2	Esponjas	0	0
41818	2	Menorca	Hilmar	13	A	1	3	Erizos	0	0
41818	2	Menorca	Hilmar	13	A	1	3	Esponjas	1	4
41818	2	Menorca	Hilmar	13	A	2	1	Erizos	0	0
41818	2	Menorca	Hilmar	13	A	2	1	Esponjas	0	0
41818	2	Menorca	Hilmar	13	A	2	2	Erizos	0	0
41818	2	Menorca	Hilmar	13	A	2	2	Esponjas	0	0
41818	2	Menorca	Hilmar	13	A	2	3	Erizos	0	0
41818	2	Menorca	Hilmar	13	A	2	3	Esponjas	0	0
41818	2	Menorca	Hilmar	13	A	3	1	Erizos	0	0
41818	2	Menorca	Hilmar	13	A	3	1	Esponjas	0	0
41818	2	Menorca	Hilmar	13	A	3	2	Erizos	1	11.2
41818	2	Menorca	Hilmar	13	A	3	2	Esponjas	0	0
41818	2	Menorca	Hilmar	13	A	3	3	Erizos	1	6.7
41818	2	Menorca	Hilmar	13	A	3	3	Esponjas	0	0
41818	2	Menorca	Hilmar	13	B	4	1	Erizos	0	0
41818	2	Menorca	Hilmar	13	B	4	1	Esponjas	1	4.2
41818	2	Menorca	Hilmar	13	B	4	2	Erizos	0	0
41818	2	Menorca	Hilmar	13	B	4	2	Esponjas	1	5.3
41818	2	Menorca	Hilmar	13	B	4	3	Erizos	1	3.5
41818	2	Menorca	Hilmar	13	B	4	3	Esponjas	0	0
41818	2	Menorca	Hilmar	13	B	5	1	Erizos	1	7.2
41818	2	Menorca	Hilmar	13	B	5	1	Erizos	1	6.7
41818	2	Menorca	Hilmar	13	B	5	1	Esponjas	0	0
41818	2	Menorca	Hilmar	13	B	5	2	Erizos	0	0
41818	2	Menorca	Hilmar	13	B	5	2	Esponjas	0	0
41818	2	Menorca	Hilmar	13	B	5	3	Erizos	0	0
41818	2	Menorca	Hilmar	13	B	5	3	Esponjas	0	0
41818	2	Menorca	Hilmar	13	B	6	1	Erizos	0	0
41818	2	Menorca	Hilmar	13	B	6	1	Esponjas	0	0
41818	2	Menorca	Hilmar	13	B	6	2	Erizos	0	0
41818	2	Menorca	Hilmar	13	B	6	2	Esponjas	0	0
41818	2	Menorca	Hilmar	13	B	6	3	Erizos	0	0
41818	2	Menorca	Hilmar	13	B	6	3	Esponjas	0	0
41819	2	Menorca	Hilmar	14	A	1	1	Erizos	0	0
41819	2	Menorca	Hilmar	14	A	1	1	Esponjas	0	0
41819	2	Menorca	Hilmar	14	A	1	2	Erizos	0	0
41819	2	Menorca	Hilmar	14	A	1	2	Esponjas	0	0
41819	2	Menorca	Hilmar	14	A	1	3	Erizos	0	0
41819	2	Menorca	Hilmar	14	A	1	3	Esponjas	0	0
41819	2	Menorca	Hilmar	14	A	2	1	Erizos	0	0
41819	2	Menorca	Hilmar	14	A	2	1	Esponjas	1	4.2
41819	2	Menorca	Hilmar	14	A	2	2	Erizos	0	0
41819	2	Menorca	Hilmar	14	A	2	2	Esponjas	0	0
41819	2	Menorca	Hilmar	14	A	2	3	Erizos	0	0
41819	2	Menorca	Hilmar	14	A	2	3	Esponjas	0	0
41819	2	Menorca	Hilmar	14	A	3	1	Erizos	0	0
41819	2	Menorca	Hilmar	14	A	3	1	Esponjas	0	0
41819	2	Menorca	Hilmar	14	A	3	2	Erizos	1	5.5
41819	2	Menorca	Hilmar	14	A	3	2	Esponjas	0	0
41819	2	Menorca	Hilmar	14	A	3	3	Erizos	0	0
41819	2	Menorca	Hilmar	14	A	3	3	Esponjas	0	0
41819	2	Menorca	Hilmar	14	B	4	1	Erizos	0	0
41819	2	Menorca	Hilmar	14	B	4	1	Esponjas	1	8.1
41819	2	Menorca	Hilmar	14	B	4	1	Esponjas	1	10.6
41819	2	Menorca	Hilmar	14	B	4	2	Erizos	1	4.6
41819	2	Menorca	Hilmar	14	B	4	2	Erizos	1	4.7
41819	2	Menorca	Hilmar	14	B	4	2	Esponjas	0	0
41819	2	Menorca	Hilmar	14	B	4	3	Erizos	0	0
41819	2	Menorca	Hilmar	14	B	4	3	Esponjas	0	0
41819	2	Menorca	Hilmar	14	B	5	1	Erizos	0	0
41819	2	Menorca	Hilmar	14	B	5	1	Esponjas	0	0
41819	2	Menorca	Hilmar	14	B	5	2	Erizos	1	6.4
41819	2	Menorca	Hilmar	14	B	5	2	Erizos	1	5.8
41819	2	Menorca	Hilmar	14	B	5	2	Esponjas	0	0
41819	2	Menorca	Hilmar	14	B	5	3	Erizos	1	3.8
41819	2	Menorca	Hilmar	14	B	5	3	Esponjas	0	0
41819	2	Menorca	Hilmar	14	B	6	1	Erizos	1	2.9
41819	2	Menorca	Hilmar	14	B	6	1	Esponjas	1	6.7
41819	2	Menorca	Hilmar	14	B	6	1	Esponjas	1	3.5
41819	2	Menorca	Hilmar	14	B	6	1	Esponjas	1	4.1
41819	2	Menorca	Hilmar	14	B	6	2	Erizos	0	0
41819	2	Menorca	Hilmar	14	B	6	2	Esponjas	0	0
41819	2	Menorca	Hilmar	14	B	6	3	Erizos	0	0
41819	2	Menorca	Hilmar	14	B	6	3	Esponjas	1	7.2
41820	2	Menorca	Hilmar	15	A	1	1	Erizos	0	0
41820	2	Menorca	Hilmar	15	A	1	1	Esponjas	1	5.6
41820	2	Menorca	Hilmar	15	A	1	2	Erizos	0	0
41820	2	Menorca	Hilmar	15	A	1	2	Esponjas	0	0
41820	2	Menorca	Hilmar	15	A	1	3	Erizos	0	0
41820	2	Menorca	Hilmar	15	A	1	3	Esponjas	1	3.9
41820	2	Menorca	Hilmar	15	A	2	1	Erizos	0	0
41820	2	Menorca	Hilmar	15	A	2	1	Esponjas	0	0
41820	2	Menorca	Hilmar	15	A	2	2	Erizos	0	0
41820	2	Menorca	Hilmar	15	A	2	2	Esponjas	1	10.3
41820	2	Menorca	Hilmar	15	A	2	3	Erizos	0	0
41820	2	Menorca	Hilmar	15	A	2	3	Esponjas	0	0
41820	2	Menorca	Hilmar	15	A	3	1	Erizos	0	0
41820	2	Menorca	Hilmar	15	A	3	1	Esponjas	1	5.9
41820	2	Menorca	Hilmar	15	A	3	1	Esponjas	1	4.8
41820	2	Menorca	Hilmar	15	A	3	2	Erizos	0	0
41820	2	Menorca	Hilmar	15	A	3	2	Esponjas	1	12.6
41820	2	Menorca	Hilmar	15	A	3	2	Esponjas	1	4.8
41820	2	Menorca	Hilmar	15	A	3	3	Erizos	0	0
41820	2	Menorca	Hilmar	15	A	3	3	Esponjas	0	0
41820	2	Menorca	Hilmar	15	B	4	1	Erizos	1	4.5
41820	2	Menorca	Hilmar	15	B	4	1	Erizos	1	5.6
41820	2	Menorca	Hilmar	15	B	4	1	Erizos	1	5.1
41820	2	Menorca	Hilmar	15	B	4	1	Erizos	1	4
41820	2	Menorca	Hilmar	15	B	4	1	Esponjas	0	0
41820	2	Menorca	Hilmar	15	B	4	2	Erizos	0	0
41820	2	Menorca	Hilmar	15	B	4	2	Esponjas	1	6.7
41820	2	Menorca	Hilmar	15	B	4	3	Erizos	0	0
41820	2	Menorca	Hilmar	15	B	4	3	Esponjas	0	0
41820	2	Menorca	Hilmar	15	B	5	1	Erizos	0	0
41820	2	Menorca	Hilmar	15	B	5	1	Esponjas	1	4.6
41820	2	Menorca	Hilmar	15	B	5	1	Esponjas	1	6.4
41820	2	Menorca	Hilmar	15	B	5	2	Erizos	1	5.6
41820	2	Menorca	Hilmar	15	B	5	2	Erizos	1	2.1
41820	2	Menorca	Hilmar	15	B	5	2	Esponjas	0	0
41820	2	Menorca	Hilmar	15	B	5	3	Erizos	0	0
41820	2	Menorca	Hilmar	15	B	5	3	Esponjas	1	6.3
41820	2	Menorca	Hilmar	15	B	6	1	Erizos	0	0
41820	2	Menorca	Hilmar	15	B	6	1	Esponjas	1	4.2
41820	2	Menorca	Hilmar	15	B	6	1	Esponjas	1	4.6
41820	2	Menorca	Hilmar	15	B	6	1	Esponjas	1	5.3
41820	2	Menorca	Hilmar	15	B	6	2	Erizos	0	0
41820	2	Menorca	Hilmar	15	B	6	2	Esponjas	1	7.5
41820	2	Menorca	Hilmar	15	B	6	3	Erizos	1	7
41820	2	Menorca	Hilmar	15	B	6	3	Esponjas	1	4.5
41821	2	Menorca	Hilmar	16	A	1	1	Erizos	0	0
41821	2	Menorca	Hilmar	16	A	1	1	Esponjas	0	0
41821	2	Menorca	Hilmar	16	A	1	2	Erizos	0	0
41821	2	Menorca	Hilmar	16	A	1	2	Esponjas	0	0
41821	2	Menorca	Hilmar	16	A	1	3	Erizos	0	0
41821	2	Menorca	Hilmar	16	A	1	3	Esponjas	0	0
41821	2	Menorca	Hilmar	16	A	2	1	Erizos	0	0
41821	2	Menorca	Hilmar	16	A	2	1	Esponjas	0	0
41821	2	Menorca	Hilmar	16	A	2	2	Erizos	0	0
41821	2	Menorca	Hilmar	16	A	2	2	Esponjas	0	0
41821	2	Menorca	Hilmar	16	A	2	3	Erizos	0	0
41821	2	Menorca	Hilmar	16	A	2	3	Esponjas	0	0
41821	2	Menorca	Hilmar	16	A	3	1	Erizos	0	0
41821	2	Menorca	Hilmar	16	A	3	1	Esponjas	0	0
41821	2	Menorca	Hilmar	16	A	3	2	Erizos	0	0
41821	2	Menorca	Hilmar	16	A	3	2	Esponjas	0	0
41821	2	Menorca	Hilmar	16	A	3	3	Erizos	0	0
41821	2	Menorca	Hilmar	16	A	3	3	Esponjas	0	0
41821	2	Menorca	Hilmar	16	B	4	1	Erizos	0	0
41821	2	Menorca	Hilmar	16	B	4	1	Esponjas	0	0
41821	2	Menorca	Hilmar	16	B	4	2	Erizos	0	0
41821	2	Menorca	Hilmar	16	B	4	2	Esponjas	0	0
41821	2	Menorca	Hilmar	16	B	4	3	Erizos	0	0
41821	2	Menorca	Hilmar	16	B	4	3	Esponjas	0	0
41821	2	Menorca	Hilmar	16	B	5	1	Erizos	0	0
41821	2	Menorca	Hilmar	16	B	5	1	Esponjas	0	0
41821	2	Menorca	Hilmar	16	B	5	2	Erizos	0	0
41821	2	Menorca	Hilmar	16	B	5	2	Esponjas	0	0
41821	2	Menorca	Hilmar	16	B	5	3	Erizos	0	0
41821	2	Menorca	Hilmar	16	B	5	3	Esponjas	0	0
41821	2	Menorca	Hilmar	16	B	6	1	Erizos	0	0
41821	2	Menorca	Hilmar	16	B	6	1	Esponjas	0	0
41821	2	Menorca	Hilmar	16	B	6	2	Erizos	0	0
41821	2	Menorca	Hilmar	16	B	6	2	Esponjas	0	0
41821	2	Menorca	Hilmar	16	B	6	3	Erizos	0	0
41821	2	Menorca	Hilmar	16	B	6	3	Esponjas	0	0
41884	3	Menorca	Hilmar	17	A	1	1	Erizos	0	0
41884	3	Menorca	Hilmar	17	A	1	1	Esponjas	0	0
41884	3	Menorca	Hilmar	17	A	1	2	Erizos	0	0
41884	3	Menorca	Hilmar	17	A	1	2	Esponjas	0	0
41884	3	Menorca	Hilmar	17	A	1	3	Erizos	0	0
41884	3	Menorca	Hilmar	17	A	1	3	Esponjas	0	0
41884	3	Menorca	Hilmar	17	A	2	1	Erizos	0	0
41884	3	Menorca	Hilmar	17	A	2	1	Esponjas	0	0
41884	3	Menorca	Hilmar	17	A	2	2	Erizos	0	0
41884	3	Menorca	Hilmar	17	A	2	2	Esponjas	0	0
41884	3	Menorca	Hilmar	17	A	2	3	Erizos	0	0
41884	3	Menorca	Hilmar	17	A	2	3	Esponjas	0	0
41884	3	Menorca	Hilmar	17	A	3	1	Erizos	0	0
41884	3	Menorca	Hilmar	17	A	3	1	Esponjas	1	4
41884	3	Menorca	Hilmar	17	A	3	2	Erizos	0	0
41884	3	Menorca	Hilmar	17	A	3	2	Esponjas	0	0
41884	3	Menorca	Hilmar	17	A	3	3	Erizos	0	0
41884	3	Menorca	Hilmar	17	A	3	3	Esponjas	1	7
41884	3	Menorca	Adam	17	B	4	1	Erizos	0	0
41884	3	Menorca	Adam	17	B	4	1	Esponjas	0	0
41884	3	Menorca	Adam	17	B	4	2	Erizos	0	0
41884	3	Menorca	Adam	17	B	4	2	Esponjas	1	7
41884	3	Menorca	Adam	17	B	4	3	Erizos	0	0
41884	3	Menorca	Adam	17	B	4	3	Esponjas	0	0
41884	3	Menorca	Adam	17	B	5	1	Erizos	0	0
41884	3	Menorca	Adam	17	B	5	1	Esponjas	0	0
41884	3	Menorca	Adam	17	B	5	2	Erizos	0	0
41884	3	Menorca	Adam	17	B	5	2	Esponjas	1	3
41884	3	Menorca	Adam	17	B	5	2	Esponjas	1	4
41884	3	Menorca	Adam	17	B	5	2	Esponjas	1	12
41884	3	Menorca	Adam	17	B	5	3	Erizos	0	0
41884	3	Menorca	Adam	17	B	5	3	Esponjas	1	10
41884	3	Menorca	Adam	17	B	5	3	Esponjas	1	11
41884	3	Menorca	Adam	17	B	5	3	Esponjas	1	8
41884	3	Menorca	Adam	17	B	5	3	Esponjas	1	8
41884	3	Menorca	Adam	17	B	6	1	Erizos	0	0
41884	3	Menorca	Adam	17	B	6	1	Esponjas	0	0
41884	3	Menorca	Adam	17	B	6	2	Erizos	0	0
41884	3	Menorca	Adam	17	B	6	2	Esponjas	1	4
41884	3	Menorca	Adam	17	B	6	2	Esponjas	1	6
41884	3	Menorca	Adam	17	B	6	3	Erizos	1	6
41884	3	Menorca	Adam	17	B	6	3	Erizos	1	5
41884	3	Menorca	Adam	17	B	6	3	Esponjas	1	17
41884	3	Menorca	Adam	17	B	6	3	Esponjas	1	8
41884	3	Menorca	Adam	17	B	6	3	Esponjas	1	7
41885	3	Menorca	Hilmar	18	A	1	1	Erizos	1	2.5
41885	3	Menorca	Hilmar	18	A	1	1	Erizos	1	2.5
41885	3	Menorca	Hilmar	18	A	1	1	Erizos	1	2
41885	3	Menorca	Hilmar	18	A	1	1	Erizos	1	6
41885	3	Menorca	Hilmar	18	A	1	1	Erizos	1	6.5
41885	3	Menorca	Hilmar	18	A	1	1	Erizos	1	3
41885	3	Menorca	Hilmar	18	A	1	1	Esponjas	1	7
41885	3	Menorca	Hilmar	18	A	1	2	Erizos	1	7
41885	3	Menorca	Hilmar	18	A	1	2	Esponjas	1	8
41885	3	Menorca	Hilmar	18	A	1	2	Esponjas	1	14
41885	3	Menorca	Hilmar	18	A	1	3	Erizos	1	4
41885	3	Menorca	Hilmar	18	A	1	3	Esponjas	0	0
41885	3	Menorca	Hilmar	18	A	2	1	Erizos	0	0
41885	3	Menorca	Hilmar	18	A	2	1	Esponjas	0	0
41885	3	Menorca	Hilmar	18	A	2	2	Erizos	0	0
41885	3	Menorca	Hilmar	18	A	2	2	Esponjas	0	0
41885	3	Menorca	Hilmar	18	A	2	3	Erizos	0	0
41885	3	Menorca	Hilmar	18	A	2	3	Esponjas	0	0
41885	3	Menorca	Hilmar	18	A	3	1	Erizos	0	0
41885	3	Menorca	Hilmar	18	A	3	1	Esponjas	0	0
41885	3	Menorca	Hilmar	18	A	3	2	Erizos	1	4
41885	3	Menorca	Hilmar	18	A	3	2	Esponjas	1	8
41885	3	Menorca	Hilmar	18	A	3	2	Esponjas	1	8
41885	3	Menorca	Hilmar	18	A	3	2	Esponjas	1	10
41885	3	Menorca	Hilmar	18	A	3	3	Erizos	0	0
41885	3	Menorca	Hilmar	18	A	3	3	Esponjas	0	0
41885	3	Menorca	Adam	18	B	4	1	Erizos	0	0
41885	3	Menorca	Adam	18	B	4	1	Esponjas	0	0
41885	3	Menorca	Adam	18	B	4	2	Erizos	0	0
41885	3	Menorca	Adam	18	B	4	2	Esponjas	1	9
41885	3	Menorca	Adam	18	B	4	2	Esponjas	1	7
41885	3	Menorca	Adam	18	B	4	2	Esponjas	1	7
41885	3	Menorca	Adam	18	B	4	2	Esponjas	1	6
41885	3	Menorca	Adam	18	B	4	2	Esponjas	1	11
41885	3	Menorca	Adam	18	B	4	3	Erizos	0	0
41885	3	Menorca	Adam	18	B	4	3	Esponjas	1	7
41885	3	Menorca	Adam	18	B	4	3	Esponjas	1	10
41885	3	Menorca	Adam	18	B	4	3	Esponjas	1	12
41885	3	Menorca	Adam	18	B	4	3	Esponjas	1	8
41885	3	Menorca	Adam	18	B	5	1	Erizos	1	5
41885	3	Menorca	Adam	18	B	5	1	Esponjas	0	0
41885	3	Menorca	Adam	18	B	5	2	Erizos	0	0
41885	3	Menorca	Adam	18	B	5	2	Esponjas	1	9
41885	3	Menorca	Adam	18	B	5	2	Esponjas	1	7
41885	3	Menorca	Adam	18	B	5	2	Esponjas	1	5
41885	3	Menorca	Adam	18	B	5	2	Esponjas	1	11
41885	3	Menorca	Adam	18	B	5	3	Erizos	0	0
41885	3	Menorca	Adam	18	B	5	3	Esponjas	0	0
41885	3	Menorca	Adam	18	B	6	1	Erizos	0	0
41885	3	Menorca	Adam	18	B	6	1	Esponjas	0	0
41885	3	Menorca	Adam	18	B	6	2	Erizos	0	0
41885	3	Menorca	Adam	18	B	6	2	Esponjas	0	0
41885	3	Menorca	Adam	18	B	6	3	Erizos	0	0
41885	3	Menorca	Adam	18	B	6	3	Esponjas	1	6
41886	3	Menorca	Hilmar	19	A	1	1	Erizos	1	7
41886	3	Menorca	Hilmar	19	A	1	1	Esponjas	0	0
41886	3	Menorca	Hilmar	19	A	1	2	Erizos	0	0
41886	3	Menorca	Hilmar	19	A	1	2	Esponjas	0	0
41886	3	Menorca	Hilmar	19	A	1	3	Erizos	0	0
41886	3	Menorca	Hilmar	19	A	1	3	Esponjas	0	0
41886	3	Menorca	Hilmar	19	A	2	1	Erizos	0	0
41886	3	Menorca	Hilmar	19	A	2	1	Esponjas	0	0
41886	3	Menorca	Hilmar	19	A	2	2	Erizos	0	0
41886	3	Menorca	Hilmar	19	A	2	2	Esponjas	0	0
41886	3	Menorca	Hilmar	19	A	2	3	Erizos	0	0
41886	3	Menorca	Hilmar	19	A	2	3	Esponjas	0	0
41886	3	Menorca	Hilmar	19	A	3	1	Erizos	1	7
41886	3	Menorca	Hilmar	19	A	3	1	Erizos	1	6
41886	3	Menorca	Hilmar	19	A	3	1	Esponjas	0	0
41886	3	Menorca	Hilmar	19	A	3	2	Erizos	1	6.5
41886	3	Menorca	Hilmar	19	A	3	2	Esponjas	0	0
41886	3	Menorca	Hilmar	19	A	3	3	Erizos	0	0
41886	3	Menorca	Hilmar	19	A	3	3	Esponjas	0	0
41886	3	Menorca	Adam	19	B	4	1	Erizos	1	9
41886	3	Menorca	Adam	19	B	4	1	Erizos	1	10
41886	3	Menorca	Adam	19	B	4	1	Erizos	1	9
41886	3	Menorca	Adam	19	B	4	1	Erizos	1	10
41886	3	Menorca	Adam	19	B	4	1	Erizos	1	10
41886	3	Menorca	Adam	19	B	4	1	Esponjas	0	0
41886	3	Menorca	Adam	19	B	4	2	Erizos	0	0
41886	3	Menorca	Adam	19	B	4	2	Esponjas	0	0
41886	3	Menorca	Adam	19	B	4	3	Erizos	1	4
41886	3	Menorca	Adam	19	B	4	3	Erizos	1	6
41886	3	Menorca	Adam	19	B	4	3	Erizos	1	7
41886	3	Menorca	Adam	19	B	4	3	Erizos	1	7
41886	3	Menorca	Adam	19	B	4	3	Erizos	1	7
41886	3	Menorca	Adam	19	B	4	3	Esponjas	1	12
41886	3	Menorca	Adam	19	B	5	1	Erizos	0	0
41886	3	Menorca	Adam	19	B	5	1	Esponjas	0	0
41886	3	Menorca	Adam	19	B	5	2	Erizos	0	0
41886	3	Menorca	Adam	19	B	5	2	Esponjas	0	0
41886	3	Menorca	Adam	19	B	5	3	Erizos	0	0
41886	3	Menorca	Adam	19	B	5	3	Esponjas	0	0
41886	3	Menorca	Adam	19	B	6	1	Erizos	0	0
41886	3	Menorca	Adam	19	B	6	1	Esponjas	0	0
41886	3	Menorca	Adam	19	B	6	2	Erizos	1	7
41886	3	Menorca	Adam	19	B	6	2	Esponjas	0	0
41886	3	Menorca	Adam	19	B	6	3	Erizos	1	7
41886	3	Menorca	Adam	19	B	6	3	Erizos	1	6
41886	3	Menorca	Adam	19	B	6	3	Esponjas	1	12
41886	3	Menorca	Adam	19	B	6	3	Esponjas	1	6
41887	3	Menorca	Hilmar	20	A	1	1	Erizos	0	0
41887	3	Menorca	Hilmar	20	A	1	1	Esponjas	0	0
41887	3	Menorca	Hilmar	20	A	1	2	Erizos	0	0
41887	3	Menorca	Hilmar	20	A	1	2	Esponjas	0	0
41887	3	Menorca	Hilmar	20	A	1	3	Erizos	0	0
41887	3	Menorca	Hilmar	20	A	1	3	Esponjas	0	0
41887	3	Menorca	Hilmar	20	A	2	1	Erizos	0	0
41887	3	Menorca	Hilmar	20	A	2	1	Esponjas	0	0
41887	3	Menorca	Hilmar	20	A	2	2	Erizos	0	0
41887	3	Menorca	Hilmar	20	A	2	2	Esponjas	1	7
41887	3	Menorca	Hilmar	20	A	2	3	Erizos	1	10
41887	3	Menorca	Hilmar	20	A	2	3	Erizos	1	6
41887	3	Menorca	Hilmar	20	A	2	3	Erizos	1	5
41887	3	Menorca	Hilmar	20	A	2	3	Esponjas	0	0
41887	3	Menorca	Hilmar	20	A	3	1	Erizos	0	0
41887	3	Menorca	Hilmar	20	A	3	1	Esponjas	0	0
41887	3	Menorca	Hilmar	20	A	3	2	Erizos	0	0
41887	3	Menorca	Hilmar	20	A	3	2	Esponjas	0	0
41887	3	Menorca	Hilmar	20	A	3	3	Erizos	0	0
41887	3	Menorca	Hilmar	20	A	3	3	Esponjas	0	0
41887	3	Menorca	Adam	20	B	4	1	Erizos	0	0
41887	3	Menorca	Adam	20	B	4	1	Esponjas	0	0
41887	3	Menorca	Adam	20	B	4	2	Erizos	0	0
41887	3	Menorca	Adam	20	B	4	2	Esponjas	0	0
41887	3	Menorca	Adam	20	B	4	3	Erizos	0	0
41887	3	Menorca	Adam	20	B	4	3	Esponjas	0	0
41887	3	Menorca	Adam	20	B	5	1	Erizos	0	0
41887	3	Menorca	Adam	20	B	5	1	Esponjas	0	0
41887	3	Menorca	Adam	20	B	5	2	Erizos	0	0
41887	3	Menorca	Adam	20	B	5	2	Esponjas	0	0
41887	3	Menorca	Adam	20	B	5	3	Erizos	0	0
41887	3	Menorca	Adam	20	B	5	3	Esponjas	0	0
41887	3	Menorca	Adam	20	B	6	1	Erizos	0	0
41887	3	Menorca	Adam	20	B	6	1	Esponjas	0	0
41887	3	Menorca	Adam	20	B	6	2	Erizos	0	0
41887	3	Menorca	Adam	20	B	6	2	Esponjas	0	0
41887	3	Menorca	Adam	20	B	6	3	Erizos	0	0
41887	3	Menorca	Adam	20	B	6	3	Esponjas	0	0
41888	3	Menorca	Hilmar	21	A	1	1	Erizos	0	0
41888	3	Menorca	Hilmar	21	A	1	1	Esponjas	0	0
41888	3	Menorca	Hilmar	21	A	1	2	Erizos	0	0
41888	3	Menorca	Hilmar	21	A	1	2	Esponjas	0	0
41888	3	Menorca	Hilmar	21	A	1	3	Erizos	0	0
41888	3	Menorca	Hilmar	21	A	1	3	Esponjas	0	0
41888	3	Menorca	Hilmar	21	A	2	1	Erizos	0	0
41888	3	Menorca	Hilmar	21	A	2	1	Esponjas	0	0
41888	3	Menorca	Hilmar	21	A	2	2	Erizos	1	10
41888	3	Menorca	Hilmar	21	A	2	2	Erizos	1	7.5
41888	3	Menorca	Hilmar	21	A	2	2	Esponjas	0	0
41888	3	Menorca	Hilmar	21	A	2	3	Erizos	0	0
41888	3	Menorca	Hilmar	21	A	2	3	Erizos	0	0
41888	3	Menorca	Hilmar	21	A	2	3	Erizos	1	5
41888	3	Menorca	Hilmar	21	A	2	3	Esponjas	0	0
41888	3	Menorca	Hilmar	21	A	3	1	Erizos	0	0
41888	3	Menorca	Hilmar	21	A	3	1	Esponjas	0	0
41888	3	Menorca	Hilmar	21	A	3	2	Erizos	0	0
41888	3	Menorca	Hilmar	21	A	3	2	Esponjas	0	0
41888	3	Menorca	Hilmar	21	A	3	3	Erizos	0	0
41888	3	Menorca	Hilmar	21	A	3	3	Esponjas	0	0
41888	3	Menorca	Adam	21	B	4	1	Erizos	0	0
41888	3	Menorca	Adam	21	B	4	1	Esponjas	0	0
41888	3	Menorca	Adam	21	B	4	2	Erizos	0	0
41888	3	Menorca	Adam	21	B	4	2	Esponjas	0	0
41888	3	Menorca	Adam	21	B	4	3	Erizos	0	0
41888	3	Menorca	Adam	21	B	4	3	Esponjas	0	0
41888	3	Menorca	Adam	21	B	5	1	Erizos	0	0
41888	3	Menorca	Adam	21	B	5	1	Esponjas	0	0
41888	3	Menorca	Adam	21	B	5	2	Erizos	0	0
41888	3	Menorca	Adam	21	B	5	2	Esponjas	0	0
41888	3	Menorca	Adam	21	B	5	3	Erizos	0	0
41888	3	Menorca	Adam	21	B	5	3	Esponjas	0	0
41888	3	Menorca	Adam	21	B	6	1	Erizos	0	0
41888	3	Menorca	Adam	21	B	6	1	Esponjas	0	0
41888	3	Menorca	Adam	21	B	6	2	Erizos	0	0
41888	3	Menorca	Adam	21	B	6	2	Esponjas	0	0
41888	3	Menorca	Adam	21	B	6	3	Erizos	1	6
41888	3	Menorca	Adam	21	B	6	3	Esponjas	0	0
41889	3	Menorca	Hilmar	22	A	1	1	Erizos	0	0
41889	3	Menorca	Hilmar	22	A	1	1	Esponjas	0	0
41889	3	Menorca	Hilmar	22	A	1	2	Erizos	0	0
41889	3	Menorca	Hilmar	22	A	1	2	Esponjas	0	0
41889	3	Menorca	Hilmar	22	A	1	3	Erizos	1	6
41889	3	Menorca	Hilmar	22	A	1	3	Erizos	1	7
41889	3	Menorca	Hilmar	22	A	1	3	Erizos	1	6.5
41889	3	Menorca	Hilmar	22	A	1	3	Esponjas	0	0
41889	3	Menorca	Hilmar	22	A	2	1	Erizos	0	0
41889	3	Menorca	Hilmar	22	A	2	1	Esponjas	0	0
41889	3	Menorca	Hilmar	22	A	2	2	Erizos	0	0
41889	3	Menorca	Hilmar	22	A	2	2	Esponjas	0	0
41889	3	Menorca	Hilmar	22	A	2	3	Erizos	0	0
41889	3	Menorca	Hilmar	22	A	2	3	Erizos	0	0
41889	3	Menorca	Hilmar	22	A	2	3	Erizos	0	0
41889	3	Menorca	Hilmar	22	A	2	3	Esponjas	0	0
41889	3	Menorca	Hilmar	22	A	3	1	Erizos	0	0
41889	3	Menorca	Hilmar	22	A	3	1	Esponjas	0	0
41889	3	Menorca	Hilmar	22	A	3	2	Erizos	0	0
41889	3	Menorca	Hilmar	22	A	3	2	Esponjas	0	0
41889	3	Menorca	Hilmar	22	A	3	3	Erizos	0	0
41889	3	Menorca	Hilmar	22	A	3	3	Esponjas	0	0
41889	3	Menorca	Adam	22	B	4	1	Erizos	1	6
41889	3	Menorca	Adam	22	B	4	1	Erizos	1	5
41889	3	Menorca	Adam	22	B	4	1	Erizos	1	8
41889	3	Menorca	Adam	22	B	4	1	Erizos	1	5
41889	3	Menorca	Adam	22	B	4	1	Erizos	1	5
41889	3	Menorca	Adam	22	B	4	1	Esponjas	0	0
41889	3	Menorca	Adam	22	B	4	2	Erizos	0	0
41889	3	Menorca	Adam	22	B	4	2	Esponjas	0	0
41889	3	Menorca	Adam	22	B	4	3	Erizos	1	6
41889	3	Menorca	Adam	22	B	4	3	Erizos	1	6
41889	3	Menorca	Adam	22	B	4	3	Erizos	1	6
41889	3	Menorca	Adam	22	B	4	3	Esponjas	0	0
41889	3	Menorca	Adam	22	B	5	1	Erizos	1	8
41889	3	Menorca	Adam	22	B	5	1	Erizos	1	7
41889	3	Menorca	Adam	22	B	5	1	Erizos	1	7
41889	3	Menorca	Adam	22	B	5	1	Erizos	1	7
41889	3	Menorca	Adam	22	B	5	1	Esponjas	0	0
41889	3	Menorca	Adam	22	B	5	2	Erizos	0	0
41889	3	Menorca	Adam	22	B	5	2	Esponjas	0	0
41889	3	Menorca	Adam	22	B	5	3	Erizos	1	6
41889	3	Menorca	Adam	22	B	5	3	Erizos	1	6
41889	3	Menorca	Adam	22	B	5	3	Erizos	1	6
41889	3	Menorca	Adam	22	B	5	3	Erizos	1	6
41889	3	Menorca	Adam	22	B	5	3	Erizos	1	7
41889	3	Menorca	Adam	22	B	5	3	Erizos	1	7
41889	3	Menorca	Adam	22	B	5	3	Erizos	1	7
41889	3	Menorca	Adam	22	B	5	3	Esponjas	0	0
41889	3	Menorca	Adam	22	B	6	1	Erizos	1	6
41889	3	Menorca	Adam	22	B	6	1	Esponjas	0	0
41889	3	Menorca	Adam	22	B	6	2	Erizos	0	0
41889	3	Menorca	Adam	22	B	6	2	Esponjas	0	0
41889	3	Menorca	Adam	22	B	6	3	Erizos	1	7
41889	3	Menorca	Adam	22	B	6	3	Erizos	1	6
41889	3	Menorca	Adam	22	B	6	3	Erizos	1	8
41889	3	Menorca	Adam	22	B	6	3	Erizos	1	6
41889	3	Menorca	Adam	22	B	6	3	Esponjas	0	0
41890	3	Menorca	Hilmar	23	A	1	1	Erizos	1	7.5
41890	3	Menorca	Hilmar	23	A	1	1	Erizos	1	6.5
41890	3	Menorca	Hilmar	23	A	1	1	Esponjas	1	5
41890	3	Menorca	Hilmar	23	A	1	1	Esponjas	1	8
41890	3	Menorca	Hilmar	23	A	1	2	Erizos	1	6.5
41890	3	Menorca	Hilmar	23	A	1	2	Erizos	1	5
41890	3	Menorca	Hilmar	23	A	1	2	Erizos	1	7
41890	3	Menorca	Hilmar	23	A	1	2	Esponjas	1	9
41890	3	Menorca	Hilmar	23	A	1	3	Erizos	0	0
41890	3	Menorca	Hilmar	23	A	1	3	Esponjas	0	0
41890	3	Menorca	Hilmar	23	A	2	1	Erizos	1	7
41890	3	Menorca	Hilmar	23	A	2	1	Erizos	1	6
41890	3	Menorca	Hilmar	23	A	2	1	Erizos	1	7
41890	3	Menorca	Hilmar	23	A	2	1	Esponjas	0	0
41890	3	Menorca	Hilmar	23	A	2	2	Erizos	0	0
41890	3	Menorca	Hilmar	23	A	2	2	Erizos	0	0
41890	3	Menorca	Hilmar	23	A	2	2	Esponjas	0	0
41890	3	Menorca	Hilmar	23	A	2	3	Erizos	0	0
41890	3	Menorca	Hilmar	23	A	2	3	Esponjas	1	4
41890	3	Menorca	Hilmar	23	A	3	1	Erizos	0	0
41890	3	Menorca	Hilmar	23	A	3	1	Esponjas	1	10
41890	3	Menorca	Hilmar	23	A	3	2	Erizos	0	0
41890	3	Menorca	Hilmar	23	A	3	2	Esponjas	0	0
41890	3	Menorca	Hilmar	23	A	3	3	Erizos	1	5.5
41890	3	Menorca	Hilmar	23	A	3	3	Esponjas	0	0
41890	3	Menorca	Adam	23	B	4	1	Erizos	0	0
41890	3	Menorca	Adam	23	B	4	1	Esponjas	0	0
41890	3	Menorca	Adam	23	B	4	2	Erizos	1	7
41890	3	Menorca	Adam	23	B	4	2	Erizos	1	6
41890	3	Menorca	Adam	23	B	4	2	Erizos	1	7
41890	3	Menorca	Adam	23	B	4	2	Erizos	1	7
41890	3	Menorca	Adam	23	B	4	2	Erizos	1	6
41890	3	Menorca	Adam	23	B	4	2	Esponjas	0	0
41890	3	Menorca	Adam	23	B	4	3	Erizos	1	6
41890	3	Menorca	Adam	23	B	4	3	Erizos	1	7
41890	3	Menorca	Adam	23	B	4	3	Esponjas	0	0
41890	3	Menorca	Adam	23	B	5	1	Erizos	0	0
41890	3	Menorca	Adam	23	B	5	1	Esponjas	0	0
41890	3	Menorca	Adam	23	B	5	2	Erizos	0	0
41890	3	Menorca	Adam	23	B	5	2	Esponjas	0	0
41890	3	Menorca	Adam	23	B	5	3	Erizos	0	0
41890	3	Menorca	Adam	23	B	5	3	Esponjas	0	0
41890	3	Menorca	Adam	23	B	6	1	Erizos	0	0
41890	3	Menorca	Adam	23	B	6	1	Esponjas	0	0
41890	3	Menorca	Adam	23	B	6	2	Erizos	1	8
41890	3	Menorca	Adam	23	B	6	2	Erizos	1	8
41890	3	Menorca	Adam	23	B	6	2	Erizos	1	8
41890	3	Menorca	Adam	23	B	6	2	Esponjas	0	0
41890	3	Menorca	Adam	23	B	6	3	Erizos	1	6
41890	3	Menorca	Adam	23	B	6	3	Erizos	1	6
41890	3	Menorca	Adam	23	B	6	3	Erizos	1	7
41890	3	Menorca	Adam	23	B	6	3	Erizos	1	7
41890	3	Menorca	Adam	23	B	6	3	Esponjas	0	0
41891	3	Menorca	Hilmar	24	A	1	1	Erizos	1	2.5
41891	3	Menorca	Hilmar	24	A	1	1	Erizos	1	7
41891	3	Menorca	Hilmar	24	A	1	1	Erizos	1	6
41891	3	Menorca	Hilmar	24	A	1	1	Esponjas	0	0
41891	3	Menorca	Hilmar	24	A	1	2	Erizos	0	0
41891	3	Menorca	Hilmar	24	A	1	2	Esponjas	0	0
41891	3	Menorca	Hilmar	24	A	1	3	Erizos	1	6
41891	3	Menorca	Hilmar	24	A	1	3	Erizos	1	6
41891	3	Menorca	Hilmar	24	A	1	3	Erizos	1	5
41891	3	Menorca	Hilmar	24	A	1	3	Erizos	1	6
41891	3	Menorca	Hilmar	24	A	1	3	Erizos	1	4
41891	3	Menorca	Hilmar	24	A	1	3	Esponjas	1	7
41891	3	Menorca	Hilmar	24	A	2	1	Erizos	1	6.5
41891	3	Menorca	Hilmar	24	A	2	1	Erizos	1	6.5
41891	3	Menorca	Hilmar	24	A	2	1	Esponjas	0	0
41891	3	Menorca	Hilmar	24	A	2	2	Erizos	1	5.5
41891	3	Menorca	Hilmar	24	A	2	2	Erizos	1	6
41891	3	Menorca	Hilmar	24	A	2	2	Erizos	1	7
41891	3	Menorca	Hilmar	24	A	2	2	Esponjas	1	8
41891	3	Menorca	Hilmar	24	A	2	3	Erizos	1	5
41891	3	Menorca	Hilmar	24	A	2	3	Erizos	1	5
41891	3	Menorca	Hilmar	24	A	2	3	Erizos	1	5.5
41891	3	Menorca	Hilmar	24	A	2	3	Erizos	1	6
41891	3	Menorca	Hilmar	24	A	2	3	Erizos	1	7
41891	3	Menorca	Hilmar	24	A	2	3	Erizos	1	7
41891	3	Menorca	Hilmar	24	A	2	3	Esponjas	1	8
41891	3	Menorca	Hilmar	24	A	2	3	Esponjas	1	4
41891	3	Menorca	Hilmar	24	A	2	3	Esponjas	1	7
41891	3	Menorca	Hilmar	24	A	2	3	Esponjas	1	13
41891	3	Menorca	Hilmar	24	A	3	1	Erizos	1	5
41891	3	Menorca	Hilmar	24	A	3	1	Erizos	1	6.5
41891	3	Menorca	Hilmar	24	A	3	1	Esponjas	1	5
41891	3	Menorca	Hilmar	24	A	3	1	Esponjas	1	6.5
41891	3	Menorca	Hilmar	24	A	3	1	Esponjas	1	5
41891	3	Menorca	Hilmar	24	A	3	1	Esponjas	1	14
41891	3	Menorca	Hilmar	24	A	3	2	Erizos	1	7
41891	3	Menorca	Hilmar	24	A	3	2	Erizos	1	5.5
41891	3	Menorca	Hilmar	24	A	3	2	Esponjas	1	4
41891	3	Menorca	Hilmar	24	A	3	3	Erizos	1	7
41891	3	Menorca	Hilmar	24	A	3	3	Erizos	1	6
41891	3	Menorca	Hilmar	24	A	3	3	Erizos	1	7
41891	3	Menorca	Hilmar	24	A	3	3	Esponjas	1	10
41891	3	Menorca	Hilmar	24	A	3	3	Esponjas	1	5
41891	3	Menorca	Hilmar	24	A	3	3	Esponjas	1	6
41891	3	Menorca	Adam	24	B	4	1	Erizos	1	7
41891	3	Menorca	Adam	24	B	4	1	Erizos	1	6
41891	3	Menorca	Adam	24	B	4	1	Erizos	1	6
41891	3	Menorca	Adam	24	B	4	1	Erizos	1	5
41891	3	Menorca	Adam	24	B	4	1	Erizos	1	5
41891	3	Menorca	Adam	24	B	4	1	Esponjas	0	0
41891	3	Menorca	Adam	24	B	4	2	Erizos	1	6
41891	3	Menorca	Adam	24	B	4	2	Esponjas	1	7
41891	3	Menorca	Adam	24	B	4	3	Erizos	1	6
41891	3	Menorca	Adam	24	B	4	3	Esponjas	1	7
41891	3	Menorca	Adam	24	B	5	1	Erizos	1	6
41891	3	Menorca	Adam	24	B	5	1	Erizos	1	5
41891	3	Menorca	Adam	24	B	5	1	Erizos	1	6
41891	3	Menorca	Adam	24	B	5	1	Erizos	1	8
41891	3	Menorca	Adam	24	B	5	1	Erizos	1	7
41891	3	Menorca	Adam	24	B	5	1	Erizos	1	6
41891	3	Menorca	Adam	24	B	5	1	Esponjas	0	0
41891	3	Menorca	Adam	24	B	5	2	Erizos	1	6
41891	3	Menorca	Adam	24	B	5	2	Erizos	1	6
41891	3	Menorca	Adam	24	B	5	2	Erizos	1	7
41891	3	Menorca	Adam	24	B	5	2	Erizos	1	7
41891	3	Menorca	Adam	24	B	5	2	Erizos	1	7
41891	3	Menorca	Adam	24	B	5	2	Esponjas	0	0
41891	3	Menorca	Adam	24	B	5	3	Erizos	0	0
41891	3	Menorca	Adam	24	B	5	3	Esponjas	0	0
41891	3	Menorca	Adam	24	B	6	1	Erizos	1	2
41891	3	Menorca	Adam	24	B	6	1	Erizos	1	2
41891	3	Menorca	Adam	24	B	6	1	Erizos	1	2
41891	3	Menorca	Adam	24	B	6	1	Esponjas	0	0
41891	3	Menorca	Adam	24	B	6	2	Erizos	0	0
41891	3	Menorca	Adam	24	B	6	2	Esponjas	0	0
41891	3	Menorca	Adam	24	B	6	3	Erizos	0	0
41891	3	Menorca	Adam	24	B	6	3	Esponjas	1	11

## Sheet:  Habitat parameters
Date	Campaign	Location	Station	Observer	Station	Site	StSi	Tansect	Turbidity	Current	TºC	Max depth	Min depth	Mean depth	Wave stress	Distance form wall	Distance from medow	Distance from sand	Rugosity	Slope	Refuge (holes <15 cm index)	Refuge (holes 15-30 cm index)	Refuge (holes 30-50 cm index)	Refuge (holes >50 cm index)	Small refuges (holes)	Large refuges (holes)	Total refuge space (holes)	Boulders small <50 cm (index 1-5)	Boulders 50-100 cm (number)	Boulders 50-100 cm (index)	Total Boulders small (index)	Boulders 100-200 cm (number)	Boulders >200 (number)	Total large boulders >1 m	Total boulders index	Total large boulders >1 m index	Sand (m2)	Gravel (m2)	Pebbles (m2)	Posidonia (m2)	Homogenous rock (m2)	Boulders (m2)	Algae habitat	Total area of transect m2 (m2)	Algae habitat covered	1-ET_cover	2-SL_cover	3-FI_cover	4-TU_cover
41792	1	Mallorca	Egos	Olga	1	A	1_1	1	NA	NA	20	6.3	6	6.15	0.686859	25	5	25	3	1	1	1	1	1	2	2	4	2	6	3	5	8	4	12	5	10	0	3	5.5	0	0	21	21	29.5	20.6272	0	0.0887574	0.254438	0
41792	1	Mallorca	Egos	Olga	1	A	1_2	2	NA	NA	20	7.5	7	7.25	0.686859	25	0	10	3	1	2	2	2	2	4	4	8	2	9	3	5	5	3	8	4	9	0	1.7	0	4	0	24.3	24.3	29.5	23.8204	0	0.151316	0.144737	0
41792	1	Mallorca	Egos	Olga	1	A	1_3	3	NA	NA	20	3.6	6	4.8	0.686859	25	5	30	3	1	1	2	1	2	3	3	6	5	6	3	8	7	1	8	4	12	0	2.5	8.5	3	0	16	16	29.5	15.5714	0.0178571	0.00892857	0.125	0.0357143
41792	1	Mallorca	Egos	Joan	1	B	1_4	4	NA	B	20	5.5	5.2	5.35	0.686859	5	10	20	2	1	2	2	1	1	4	2	6	2	15	4	6	9	1	10	4	10	0	0.3	0.2	1	0	28.5	28.5	29.5	28.1667	0.140351	0.128655	0.0409357	0.116959
41792	1	Mallorca	Egos	Joan	1	B	1_5	5	NA	B	20	5.6	4.9	5.25	0.686859	30	30	30	3	1	1	2	1	1	3	2	5	2	7	3	5	6	5	11	4	9	0	0	0.9	1	0	28.1	28.1	29.5	27.5265	0	0.136054	0.047619	0.190476
41792	1	Mallorca	Egos	Joan	1	B	1_6	6	NA	NA	20	4.6	4.6	4.6	0.686859	30	15	30	2	1	1	1	1	1	2	2	4	4	12	4	8	4	1	5	4	12	0.3	0.2	2.5	0	0	27	27	29.5	23.04	0.04	0.08	0.0666667	0.133333
41793	1	Mallorca	Total	Olga	2	A	2_1	1	NA	NA	20	7.3	7	7.15	0.694767	10	5	50	4	1	2	2	3	4	4	7	11	1	3	2	3	13	5	18	5	8	0	0	0	2	0	28	28	29.5	27.475	0.1375	0.14375	0.1	0
41793	1	Mallorca	Total	Olga	2	A	2_2	2	NA	NA	20	8.2	7.7	7.95	0.694767	5	5	50	3	1	2	2	2	3	4	5	9	1	5	2	3	12	4	16	5	8	0	0	0	3	0	27	27	29.5	26.069	0.218391	0.12069	0.114943	0.0287356
41793	1	Mallorca	Total	Olga	2	A	2_3	3	NA	NA	20	7.5	7.4	7.45	0.694767	5	5	50	2	1	2	2	2	2	4	4	8	2	3	2	4	7	2	9	4	8	0	0	0.5	0.5	10	19	29	29.5	27.7571	0.157143	0.114286	0.0214286	0.0357143
41793	1	Mallorca	Total	Joan	2	B	2_4	4	NA	NA	20	6.7	5.6	6.15	0.694767	30	25	0	2.5	1	1	2	1	1	3	2	5	1	7	3	4	10	2	12	5	9	0	0	0.6	0	0	29.4	29.4	29.5	28.8535	0.0260223	0.111524	0.0483271	0.587361
41793	1	Mallorca	Total	Joan	2	B	2_5	5	NA	NA	20	8.5	6.5	7.5	0.694767	30	17.5	30	4	3	2	3	3	1	5	4	9	1	0	1	2	9	5	14	5	7	0	0	0	0	0	30	30	29.5	26.6667	0.0333333	0.144444	0.0611111	0.122222
41793	1	Mallorca	Total	Joan	2	B	2_6	6	NA	NA	20	7.7	6.9	7.3	0.694767	20	5	5	2.5	2	1	2	2	1	3	3	6	2	4	2	4	3	3	6	4	8	0	0	0.2	0	0	29.8	29.8	29.5	28.8067	0.025	0.0666667	0.0583333	0.125
41794	1	Mallorca	Es_Baccs	Olga	3	A	3_1	1	NA	NA	20	5.7	5.6	5.65	0.658796	30	5	0	4.5	1	3	3	3	4	6	7	13	3	15	4	7	9	8	17	5	12	0	0	0	0	0	30	30	29.5	25.7143	0.371429	0.0928571	0.121429	0
41794	1	Mallorca	Es_Baccs	Olga	3	A	3_2	2	NA	NA	20	8.2	7.9	8.05	0.658796	50	30	50	3	1	2	2	3	3	4	6	10	2	14	4	6	11	2	13	5	11	0	0.5	0	1	0	28.5	28.5	29.5	27.2143	0.383459	0.0977444	0.18797	0
41794	1	Mallorca	Es_Baccs	Olga	3	A	3_3	3	NA	NA	20	7	7	7	0.658796	30	20	50	3	1	2	3	3	2	5	5	10	2	16	4	6	9	0	9	4	10	0	0.5	0	8	0	21.5	21.5	29.5	19.8462	0.637363	0.0989011	0.10989	0
41794	1	Mallorca	Es_Baccs	Joan	3	B	3_4	4	NA	NA	20	8.4	7.1	7.75	0.658796	30	5	5	2	1	3	2	1	1	5	2	7	4	20	5	9	0	0	0	1	10	2	0	0	2	0	26	26	29.5	26	0.0458015	0.0687023	0.0458015	0.0534351
41794	1	Mallorca	Es_Baccs	Joan	3	B	3_5	5	NA	NA	20	8.8	6.9	7.85	0.658796	30	1	3	2	1	2	1	1	1	3	2	5	2	20	5	7	2	0	2	2	9	17	0	0	1	0	12	12	29.5	12	0.092437	0.0168067	0.00840336	0.0420168
41794	1	Mallorca	Es_Baccs	Joan	3	B	3_6	6	NA	B	20	5	5	5	0.658796	15	20	0	3.5	1	2	1	1	1	3	2	5	4	10	3	7	4	4	8	4	11	0	0	1	0	0	29	29	29.5	29	0.410072	0.0935252	0.100719	0.0359712
41795	1	Mallorca	Sant_elm	Olga	4	A	4_1	1	NA	NA	21	5.6	6.4	6	0.535292	5	5	50	3	1	3	2	2	2	5	4	9	3	17	4	7	7	2	9	4	11	0	0	2.5	0.5	0	27	27	29.5	27	0.137615	0.174312	0.119266	0.0825688
41795	1	Mallorca	Sant_elm	Olga	4	A	4_2	2	NA	NA	20	7.9	7.6	7.75	0.535292	5	2	50	2	1	2	2	2	2	4	4	8	2	7	3	5	4	1	5	4	9	0	0	0	3.5	10	16.5	26.5	29.5	26.5	0	0.21831	0.147887	0
41795	1	Mallorca	Sant_elm	Olga	4	A	4_3	3	NA	NA	20	3.7	7.8	5.75	0.535292	10	5	50	2.5	1	3	2	3	2	5	5	10	2	10	3	5	11	0	11	4	9	0	0	0.5	1	1	27.5	28.5	29.5	28.5	0	0.290323	0.169355	0
41795	1	Mallorca	Sant_elm	Joan	4	B	4_4	4	NA	M	20	9.4	7.7	8.55	0.535292	3	10	0	4	3	3	3	3	2	6	5	11	2	3	2	4	11	6	17	5	9	0	0	0	1	0	29	29	29.5	29	0.0792079	0.0148515	0.242574	0.183168
41795	1	Mallorca	Sant_elm	Joan	4	B	4_5	5	NA	M	21	10	8.1	9.05	0.535292	5	3	0	2	1	2	2	2	1	4	3	7	2	2	2	4	2	3	5	4	8	0	0	2	1	3	24	27	29.5	27	0.188776	0.0612245	0.183673	0.147959
41795	1	Mallorca	Sant_elm	Joan	4	B	4_6	6	NA	B	20	8.5	6.8	7.65	0.535292	5	10	0	2	2	2	2	1	1	4	2	6	2	9	3	5	2	1	3	3	8	0	0	0	0	4	26	30	29.5	30	0.217391	0.0724638	0.0724638	0.108696
41796	1	Mallorca	Llump	Olga	5	A	5_1	1	NA	NA	20	8.4	7.3	7.85	0.497826	5	5	50	1	2	1	2	1	1	3	2	5	2	3	2	4	1	0	1	2	6	0	0.5	0	0	0	29.5	29.5	29.5	29.5	0.397959	0.214286	0.0918367	0.0102041
41796	1	Mallorca	Llump	Olga	5	A	5_2	2	NA	NA	20	8.4	7.8	8.1	0.497826	10	5	50	2	1	5	4	1	1	9	2	11	5	9	3	8	0	0	0	1	9	0	0	0	4.5	0	25.5	25.5	29.5	25.5	0.505051	0.0909091	0.0909091	0
41796	1	Mallorca	Llump	Olga	5	A	5_3	3	NA	NA	20	8.3	6.7	7.5	0.497826	5	0	50	1	2	3	1	1	1	4	2	6	2	3	2	4	0	0	0	1	5	0	1.5	1	4	0	23.5	23.5	29.5	23.5	0.663366	0.128713	0.138614	0
41796	1	Mallorca	Llump	Joan	5	B	5_4	4	NA	B	21	6.7	4.7	5.7	0.497826	5	3	0	4	2	2	3	3	1	5	4	9	2	7	3	5	8	10	18	5	10	0	0	0	0.3	0	29.7	29.7	29.5	29.7	0.503704	0.155556	0.111111	0.0296296
41796	1	Mallorca	Llump	Joan	5	B	5_5	5	NA	B	21	6	4.8	5.4	0.497826	30	15	10	4	1	2	2	3	1	4	4	8	2	5	2	4	6	9	15	5	9	0	0	0.3	3	0	26.7	26.7	29.5	26.7	0.460317	0.15873	0.214286	0.015873
41796	1	Mallorca	Llump	Joan	5	B	5_6	6	NA	B	21	6.1	4.5	5.3	0.497826	20	1	0	3	2	2	2	1	1	4	2	6	1	6	3	4	8	7	15	5	9	0	0	0	5	0	25	25	29.5	25	0.447154	0.0569106	0.138211	0
41797	1	Mallorca	Malgrats	Olga	6	A	6_1	1	NA	NA	21	7.6	7.2	7.4	0.419345	15	15	50	2	1	3	2	1	1	5	2	7	3	12	4	7	3	0	3	3	10	0	0	0.5	1.5	0	28	28	29.5	28	0.412844	0.137615	0.229358	0
41797	1	Mallorca	Malgrats	Olga	6	A	6_2	2	NA	NA	21	7.8	7.6	7.7	0.419345	30	10	50	2	1	3	2	2	1	5	3	8	4	18	4	8	4	0	4	3	11	0	0.2	1.5	0.5	0	27.8	27.8	29.5	27.8	0.356322	0.149425	0.114943	0.0344828
41797	1	Mallorca	Malgrats	Olga	6	A	6_3	3	NA	NA	21	7.3	7.2	7.25	0.419345	10	10	50	2	1	4	4	1	1	8	2	10	4	16	4	8	2	0	2	2	10	0	0	1.5	0.5	0	28	28	29.5	25.6226	0.198113	0.0660377	0.0377358	0.0943396
41797	1	Mallorca	Malgrats	Joan	6	B	6_4	4	NA	NA	21	8.7	7.9	8.3	0.419345	15	3	2	3.5	3	4	3	3	3	7	6	13	3	13	4	7	8	6	14	5	12	0	0	0	0.5	0	29.5	29.5	29.5	29.5	0.253333	0.186667	0.266667	0
41797	1	Mallorca	Malgrats	Joan	6	B	6_5	5	NA	B	21	10	8.4	9.2	0.419345	15	2	0	3	3	3	3	2	1	6	3	9	2	12	4	6	11	6	17	5	11	0	0	0	2.5	0	27.5	27.5	29.5	27.5	0.127273	0.236364	0.260606	0
41797	1	Mallorca	Malgrats	Joan	6	B	6_6	6	NA	B	21	10.5	8.7	9.6	0.419345	5	2	0	2	2	3	2	3	3	5	6	11	1	18	4	5	8	0	8	4	9	0	0	0	6.2	0	23.8	23.8	29.5	23.8	0.194444	0.125	0.326389	0
41798	1	Mallorca	Quixal	Olga	7	A	7_1	1	NA	NA	21	7.6	6.2	6.9	0.419345	5	5	50	1.5	2	1	2	2	1	3	3	6	1	1	2	3	0	0	0	1	4	0	0	0	0	1	29	30	29.5	30	0.0357143	0.25	0.205357	0
41798	1	Mallorca	Quixal	Olga	7	A	7_2	2	NA	NA	21	7.4	6.3	6.85	0.419345	3	10	50	2	1	1	2	2	1	3	3	6	2	4	2	4	3	1	4	3	7	0	0	0	0	18	12	30	29.5	30	0.07	0.51	0.09	0
41798	1	Mallorca	Quixal	Olga	7	A	7_3	3	NA	NA	21	8.4	6.9	7.65	0.419345	3	0	50	1.5	1	3	2	3	2	5	5	10	1	0	1	2	0	1	1	2	4	0	0	0	0	30	0	30	29.5	30	0.12381	0.257143	0.190476	0
41798	1	Mallorca	Quixal	Joan	7	B	7_4	4	NA	M	22	9.4	7	8.2	0.419345	20	10	0	3	1	1	1	1	2	2	3	5	1	6	3	4	5	4	9	4	8	0	0.2	0.2	0	6	23.6	29.6	29.5	29.6	0.0526316	0.292398	0.19883	0.0175439
41798	1	Mallorca	Quixal	Joan	7	B	7_5	5	NA	MB	22	6.5	4.7	5.6	0.419345	15	30	7	2.5	1	1	1	2	2	2	4	6	2	4	2	4	1	2	3	3	7	0	0	0	0	12	18	30	29.5	30	0.0533333	0.186667	0.2	0.0266667
41798	1	Mallorca	Quixal	Joan	7	B	7_6	6	NA	MB	22	8.3	6.6	7.45	0.419345	20	15	0	2	2	3	2	1	1	5	2	7	2	22	5	7	5	1	6	4	11	0	0	2	0	0	28	28	29.5	28	0.0467836	0.210526	0.169591	0.0292398
41799	1	Mallorca	Daflubrix	Olga	8	A	8_1	1	NA	NA	21	6.8	6.4	6.6	0.45053	10	50	50	4.5	1	2	3	3	4	5	7	12	2	6	3	5	7	6	13	5	10	0	0	1	0	0	29	29	29.5	27.4574	0.457447	0.202128	0.12766	0
41799	1	Mallorca	Daflubrix	Olga	8	A	8_2	2	NA	NA	21	7.2	8	7.6	0.45053	21	50	50	3.5	1	3	3	3	2	6	5	11	3	15	4	7	10	4	14	5	12	0	0.5	4	0	0	25.5	25.5	29.5	25.5	0.522727	0.102273	0.102273	0
41799	1	Mallorca	Daflubrix	Olga	8	A	8_3	3	NA	NA	21	7.8	6.3	7.05	0.45053	15	50	50	2.5	2	3	3	2	2	6	4	10	2	10	3	5	4	4	8	4	9	0	0.2	1	0	3.4	25.4	28.8	29.5	28.8	0.566265	0.120482	0	0
41799	1	Mallorca	Daflubrix	Joan	8	B	8_4	4	NA	B	22	7	4.8	5.9	0.45053	10	30	10	3	2	2	2	1	1	4	2	6	1	5	2	3	6	1	7	4	7	4.1	0	0.9	0	0	25	25	29.5	25	0.214689	0.163842	0.169492	0.0451977
41799	1	Mallorca	Daflubrix	Joan	8	B	8_5	5	NA	NA	22	5.5	3.3	4.4	0.45053	15	30	30	3	1	4	2	2	1	6	3	9	1	22	5	6	7	2	9	4	10	0	0	0	0	0.5	29.5	30	29.5	30	0.1	0.130769	0	0.169231
41799	1	Mallorca	Daflubrix	Joan	8	B	8_6	6	NA	NA	21	6.4	5.1	5.75	0.45053	30	5	0	3	2	3	3	3	4	6	7	13	1	6	3	4	14	3	17	5	9	0	0	0	0	0	30	30	29.5	28.8	0.133333	0.213333	0.146667	0.00666667
41814	2	Menorca	Reserva Integral Menorca	Olga	9	A	9_1	1	NA	NA	23	7	6.8	6.9	1.14174	30	20	30	1	1	1	1	1	1	2	2	4	1	0	1	2	0	0	0	1	3	0	0	0	0	27	3	30	29.5	28.7879	0.40404	0	0.010101	0
41814	2	Menorca	Reserva Integral Menorca	Olga	9	A	9_2	2	NA	NA	23	8.3	7.5	7.9	1.14174	30	20	30	1.5	1	2	2	1	1	4	2	6	1	7	3	4	0	0	0	1	5	0	0	0	0	30	0	30	29.5	28.56	0.304	0	0.12	0
41814	2	Menorca	Reserva Integral Menorca	Olga	9	A	9_3	3	NA	NA	24	7	6.2	6.6	1.14174	20	30	30	1.5	1	1	2	2	3	3	5	8	1	2	2	3	0	0	0	1	4	0	0	0	0	30	0	30	29.5	29.76	0.24	0	0.096	0
41814	2	Menorca	Reserva Integral Menorca	Joan	9	B	9_4	4	NA	B	24	8.7	7	7.85	1.14174	0	0	0	4	1	2	1	1	1	3	2	5	4	5	2	6	1	3	4	3	9	0	0	0	0	0	30	30	29.5	30	0	0	0	0
41814	2	Menorca	Reserva Integral Menorca	Joan	9	B	9_5	5	NA	NA	23	11	7.7	9.35	1.14174	0	20	0	3	3	2	2	2	2	4	4	8	2	6	3	5	1	2	3	3	8	0	0	0	0	0	30	30	29.5	30	0	0.0309278	0.28866	0
41814	2	Menorca	Reserva Integral Menorca	Joan	9	B	9_6	6	NA	NA	23	8.6	8.6	8.6	1.14174	0	0	0	1	1	4	1	1	1	5	2	7	5	5	2	7	0	0	0	1	8	0	0	0	0	0	30	30	29.5	30	0	0	0.157895	0
41815	2	Menorca	Reserva Partial Menorca	Olga	10	A	10_1	1	NA	NA	24	6.5	6	6.25		15	5	30	5	1	2	3	4	4	5	8	13	2	14	4	6	9	9	18	5	11	0	0	0	0	0	30	30	29.5	29.6842	0.694737	0	0.0421053	0
41815	2	Menorca	Reserva Partial Menorca	Olga	10	A	10_2	2	NA	NA	24	8.3	7.3	7.8		15	0	30	3	2	2	3	3	3	5	6	11	2	10	3	5	10	4	14	5	10	0	0.5	0	2	0	27.5	27.5	29.5	27.5	0.564103	0	0.282051	0
41815	2	Menorca	Reserva Partial Menorca	Olga	10	A	10_3	3	NA	NA	23	7.9	5.8	6.85		10	30	30	1.5	1	2	1	1	2	3	3	6	1	2	2	3	0	3	3	3	6	0	0	0	0	30	0	30	29.5	17.1	0.11	0.02	0.11	0
41815	2	Menorca	Reserva Partial Menorca	Joan	10	B	10_4	4	NA	NA	23	8	7	7.5		0	30	0	5	2	2	3	4	1	5	5	10	1	2	2	3	6	6	12	5	8	0	0	0	0	4	26	30	29.5	30	0.0901639	0	0.352459	0
41815	2	Menorca	Reserva Partial Menorca	Joan	10	B	10_5	5	NA	B	23	7.4	0	3.7		10	0	0	3	1	1	3	2	1	4	3	7	1	12	4	5	11	2	13	5	10	0	0	0	0	0	30	30	29.5	30	0.225806	0	0.41129	0
41815	2	Menorca	Reserva Partial Menorca	Joan	10	B	10_6	6	NA	B	23	7	6	6.5		10	10	0	3	1	3	2	2	2	5	4	9	2	12	4	6	7	0	7	4	10	0	0	0	2.5	0	27.5	27.5	29.5	27.5	0.0935252	0	0.359712	0
41816	2	Menorca	Cova des Vell Marie	Olga	11	A	11_1	1	NA	NA	25	8.4	6.2	7.3	0.784323	3	0	20	3	1	3	3	3	3	6	6	12	3	7	3	6	4	7	11	4	10	0	0	0	0	0	30	30	29.5	28.9916	0.00840336	0	0.201681	0
41816	2	Menorca	Cova des Vell Marie	Olga	11	A	11_2	2	NA	NA	24	7	8.5	7.75	0.784323	15	2	15	2.5	1	2	2	1	1	4	2	6	3	9	3	6	8	0	8	4	10	3	2	0	0.5	0	24.5	24.5	29.5	24.5	0	0	0.0840336	0.00840336
41816	2	Menorca	Cova des Vell Marie	Olga	11	A	11_3	3	NA	NA	24	7.1	6.4	6.75	0.784323	10	5	15	2	1	4	3	2	2	7	4	11	4	13	4	8	7	1	8	4	12	0	1	0.5	1.5	0	27	27	29.5	26.2768	0	0	0.00892857	0
41816	2	Menorca	Cova des Vell Marie	Joan	11	B	11_4	4	NA	B	24	9	6.9	7.95	0.784323	10	5	0	2	1	1	1	2	1	2	3	5	1	0	1	2	0	0	0	1	3	0	0	0	4.5	25	0	25	29.5	20.7265	0.119658	0	0.0854701	0
41816	2	Menorca	Cova des Vell Marie	Joan	11	B	11_5	5	NA	NA	24	8.2	5.8	7	0.784323	20	5	0	3	1	2	2	1	2	4	3	7	1	0	1	2	0	0	0	1	3	0	0	0	0.3	30	-0.3	29.7	29.5	24.2092	0.12605	0	0.176471	0
41816	2	Menorca	Cova des Vell Marie	Joan	11	B	11_6	6	NA	B	24	7	5.8	6.4	0.784323	10	5	0	2	3	2	1	2	1	3	3	6	1	0	1	2	0	0	0	1	3	0	0	0	6	24	0	24	29.5	18.5567	0.0103093	0	0.134021	0
41817	2	Menorca	Mongopre	Olga	12	A	12_1	1	NA	NA	23	8.4	7.5	7.95	0.408383	20	30	30	3	1	2	4	3	2	6	5	11	3	14	4	7	6	1	7	4	11	0	0	0	2.5	0	27.5	27.5	29.5	27.5	0.213333	0	0.12	0
41817	2	Menorca	Mongopre	Olga	12	A	12_2	2	NA	NA	24	6.7	6.5	6.6	0.408383	NA	30	30	3	1	3	3	2	1	6	3	9	3	10	3	6	5	4	9	4	10	0	0	2	0	0	28	28	29.5	28	0.254902	0.00653595	0.0522876	0.0326797
41817	2	Menorca	Mongopre	Olga	12	A	12_3	3	NA	NA	23	8.5	7.6	8.05	0.408383	NA	10	25	4	1	3	3	3	2	6	5	11	2	7	3	5	4	5	9	4	9	0	0	0	0	0	30	30	29.5	30	0.1	0	0.2	0
41817	2	Menorca	Mongopre	Joan	12	B	12_4	4	NA	B	24	8	7	7.5	0.408383	0	17	0	2	1	3	3	1	1	6	2	8	2	12	4	6	4	1	5	4	10	0	0.2	0	0.5	0	29.3	29.3	29.5	29.3	0.423077	0	0	0
41817	2	Menorca	Mongopre	Joan	12	B	12_5	5	NA	B	24	8.5	7.6	8.05	0.408383	0	10	0	2	1	3	3	1	2	6	3	9	3	10	3	6	5	0	5	4	10	0	0	0	0.6	0	29.4	29.4	29.5	29.4	0.59	0	0	0
41817	2	Menorca	Mongopre	Joan	12	B	12_6	6	NA	B	24	7.3	5.8	6.55	0.408383	0	0	0	4	1	4	1	1	1	5	2	7	4	5	2	6	6	5	11	4	10	0	0	2.5	0	0	27.5	27.5	29.5	27.5	0.758621	0	0	0
41818	2	Menorca	Vernir	Olga	13	A	13_1	1	NA	NA	24	7.3	6	6.65	0.873923	3	25	30	5	1	2	3	3	5	5	8	13	2	7	3	5	6	9	15	5	10	0	0	0	0	0	30	30	29.5	30	0.209302	0	0.348837	0
41818	2	Menorca	Vernir	Olga	13	A	13_2	2	NA	NA	23	9.3	7.5	8.4	0.873923	2	0	30	3	1	3	3	2	4	6	6	12	3	4	2	5	2	5	7	4	9	0	1	2.5	0.2	0	26.3	26.3	29.5	26.3	0.0232558	0	0.286822	0
41818	2	Menorca	Vernir	Olga	13	A	13_3	3	NA	NA	23	8.2	6.6	7.4	0.873923	30	5	30	2	2	2	2	2	1	4	3	7	2	1	2	4	1	2	3	3	7	0	0	0	0	0	30	30	29.5	30	0.548148	0	0	0
41818	2	Menorca	Vernir	Joan	13	B	13_4	4	NA	B	24	6.5	4.2	5.35	0.873923	10	5	0	3	3	2	2	1	1	4	2	6	2	1	2	4	2	0	2	2	6	0	0	0	0	27	3	30	29.5	29.5973	0.483221	0	0.0536913	0
41818	2	Menorca	Vernir	Joan	13	B	13_5	5	NA	B	24	5.1	3.8	4.45	0.873923	10	10	0	3	2	1	1	2	1	2	3	5	2	2	2	4	2	1	3	3	7	0	0	0	0	24	6	30	29.5	29.7297	0.495495	0	0.0990991	0
41818	2	Menorca	Vernir	Joan	13	B	13_6	6	NA	B	24	4.9	3.9	4.4	0.873923	5	2	0	2.5	1	4	3	1	1	7	2	9	4	10	3	7	6	1	7	4	11	0	0	0.3	0	0	29.7	29.7	29.5	29.7	0.0344828	0	0.0431034	0
41819	2	Menorca	Font	Olga	14	A	14_1	1	NA	NA	22	6.8	8.2	7.5	0.798119	30	2	20	1.5	1	1	1	2	3	2	5	7	1	4	2	3	1	0	1	2	5	2	0	0	0	27	1	28	29.5	28	0	0	0.251852	0
41819	2	Menorca	Font	Olga	14	A	14_2	2	NA	NA	24	7.4	5.4	6.4	0.798119	3	5	30	2.5	1	3	3	3	3	6	6	12	3	7	3	6	2	2	4	3	9	0	0	0	0	4	26	30	29.5	30	0	0.137097	0.104839	0
41819	2	Menorca	Font	Olga	14	A	14_3	3	NA	NA	22	8.2	2.3	5.25	0.798119	10	0	30	2	1	2	3	3	2	5	5	10	1	7	3	4	5	0	5	4	8	0	0	0	0	5	25	30	29.5	30	0	0	0.157407	0
41819	2	Menorca	Font	Joan	14	B	14_4	4	NA	NA	23	9.5	66	37.75	0.798119	5	30	0	3	2	1	1	1	1	2	2	4	1	0	1	2	0	0	0	1	3	0	0	0	0	27	3	30	29.5	30	0.0125786	0.125786	0.081761	0
41819	2	Menorca	Font	Joan	14	B	14_5	5	NA	MB	22	9.3	8.5	8.9	0.798119	10	15	20	1	2	2	1	1	1	3	2	5	1	0	1	2	0	0	0	1	3	0	0	0	0	30	0	30	29.5	30	0	0.0126582	0.0443038	0
41819	2	Menorca	Font	Joan	14	B	14_6	6	NA	B	23	6.5	5.5	6	0.798119	10	10	0	1	1	2	1	1	1	3	2	5	1	0	1	2	0	0	0	1	3	0	0	0	0	30	0	30	29.5	30	0	0	0.111111	0
41820	2	Menorca	La_Mola	Olga	15	A	15_1	1	NA	NA	24	6.8	6.6	6.7	0.504709	30	30	30	3.5	1	2	4	4	4	6	8	14	2	11	4	6	10	4	14	5	11	0	0.2	1	0	0	28.8	28.8	29.5	28.8	0.136364	0	0.162338	0.00649351
41820	2	Menorca	La_Mola	Olga	15	A	15_2	2	NA	NA	23	8.5	7.8	8.15	0.504709	60	10	60	4.5	1	4	4	5	5	8	10	18	2	9	3	5	10	9	19	5	10	0	0	0	0.2	0	29.8	29.8	29.5	29.8	0.0877193	0	0.298246	0
41820	2	Menorca	La_Mola	Olga	15	A	15_3	3	NA	NA	23	8.1	7.3	7.7	0.504709	30	10	50	2.5	1	4	4	2	1	8	3	11	3	20	5	8	6	2	8	4	12	0	0.2	0.5	0	0	29.3	29.3	29.5	29.3	0.122137	0.0305344	0.114504	0
41820	2	Menorca	La_Mola	Joan	15	B	15_4	4	NA	B	24	5.5	5	5.25	0.504709	30	15	0	2.5	1	4	3	1	1	7	2	9	3	8	3	6	5	2	7	4	10	0	0	0	0	4	26	30	29.5	30	0.0291971	0	0.0437956	0
41820	2	Menorca	La_Mola	Joan	15	B	15_5	5	NA	B	24	6	4.9	5.45	0.504709	20	15	0	3	1	4	3	2	1	7	3	10	2	5	2	4	6	2	8	4	8	0	0	1.6	1	0	27.4	27.4	29.5	26.4927	0.0596026	0.0264901	0.0860927	0
41820	2	Menorca	La_Mola	Joan	15	B	15_6	6	NA	B	24	7.7	6	6.85	0.504709	5	5	0	3.5	1	3	3	3	1	6	4	10	2	12	4	6	6	4	10	4	10	0	0	0.9	0.5	0	28.6	28.6	29.5	28.6	0.107843	0.00980392	0.137255	0
41821	2	Menorca	Es_Grau	Olga	16	A	16_1	1	NA	NA	23	6.7	7	6.85	0.424441	50	0	50	2	1	2	2	2	2	4	4	8	4	17	4	8	4	2	6	4	12	1.5	0	0	0.2	0	28.3	28.3	29.5	28.3	0.364238	0	0	0
41821	2	Menorca	Es_Grau	Olga	16	A	16_2	2	NA	NA	24	7.2	7.4	7.3	0.424441	2	1	50	2.5	1	2	2	3	2	4	5	9	2	20	5	7	4	2	6	4	11	0.2	0	4.5	0.5	0	24.8	24.8	29.5	24.8	0.0619469	0	0.0265487	0.00884956
41821	2	Menorca	Es_Grau	Olga	16	A	16_3	3	NA	NA	23	7.3	6.6	6.95	0.424441	50	3	50	2	1	3	3	3	2	6	5	11	4	17	4	8	4	1	5	4	12	0	0.2	0	0.7	2.5	26.6	29.1	29.5	29.1	0.213675	0	0.00854701	0.00854701
41821	2	Menorca	Es_Grau	Joan	16	B	16_4	4	NA	B	23	7.4	6.3	6.85	0.424441	30	2	0	4	1	1	1	2	2	2	4	6	1	10	3	4	8	4	12	5	9	0	0	0	2.8	0	27.2	27.2	29.5	26.9891	0.271318	0	0.0155039	0
41821	2	Menorca	Es_Grau	Joan	16	B	16_5	5	NA	B	23	7.1	6.2	6.65	0.424441	30	10	0	3	1	3	2	1	1	5	2	7	2	11	4	6	11	5	16	5	11	0	0	0.4	2.1	0	27.5	27.5	29.5	27.2932	0.345865	0	0	0
41821	2	Menorca	Es_Grau	Joan	16	B	16_6	6	NA	B	23	5.3	4	4.65	0.424441	30	4	1	2	3	3	3	3	3	6	6	12	2	7	3	5	0	0	0	1	6	0	0	0	0	0	30	30	29.5	29.7656	0.273438	0	0	0.0078125
41884	3	Menorca	Es_Caragol	Olga	17	A	17_1	1	NA	B	26	9.3	8.5	8.9	0.546412	5	5	50	1	1	1	2	1	1	3	2	5	1	3	2	3	0	0	0	1	4	0	0	0	0	29	1	30	29.5	27.913	0	0	0.0347826	0
41884	3	Menorca	Es_Caragol	Olga	17	A	17_2	2	NA	B	26	9.3	8	8.65	0.546412	50	5	50	1	2	1	1	1	2	2	3	5	1	0	1	2	0	0	0	1	3	0	0	0	0	30	0	30	29.5	28.2178	0	0	0	0
41884	3	Menorca	Es_Caragol	Olga	17	A	17_3	3	NA	B	25	9.3	7.7	8.5	0.546412	50	5	50	1.5	2	1	1	2	2	2	4	6	1	0	1	2	0	0	0	1	3	0	0	0	0	30	0	30	29.5	26.5714	0	0	0.0190476	0
41884	3	Menorca	Es_Caragol	Joan	17	B	17_4	4	NA	B	25	9	7	8	0.546412	30	5	50	2	2	2	1	1	1	3	2	5	1	0	1	2	0	0	0	1	3	0.5	0	0	0	29.5	0	29.5	29.5	23.4076	0	0	0	0
41884	3	Menorca	Es_Caragol	Joan	17	B	17_5	5	NA	B	25	8.3	6.3	7.3	0.546412	15	50	50	3	2	2	1	1	1	3	2	5	1	0	1	2	0	0	0	1	3	0	0	0	0	30	0	30	29.5	28.2143	0	0	0.0119048	0
41884	3	Menorca	Es_Caragol	Joan	17	B	17_6	6	NA	B	25	7	6.1	6.55	0.546412	50	15	50	2	1	3	2	1	1	5	2	7	1	0	1	2	0	0	0	1	3	0	0	0	0	30	0	30	29.5	29.2105	0	0	0.118421	0
41885	3	Menorca	Punta_Prima	Olga	18	A	18_1	1	NA	B	26	6.6	6.3	6.45	0.75268	1	0	50	1	1	1	2	1	2	3	3	6	1	0	1	2	1	0	1	2	4	0	0	0	0	28.5	1.5	30	29.5	29.0164	0	0	0	0
41885	3	Menorca	Punta_Prima	Olga	18	A	18_2	2	NA	B	26	7.4	6.5	6.95	0.75268	10	1	50	2	1	3	4	2	2	7	4	11	4	18	4	8	1	0	1	2	10	0	1.5	2.3	0	6	20.2	26.2	29.5	23.9358	0	0	0	0
41885	3	Menorca	Punta_Prima	Olga	18	A	18_3	3	NA	B	25	6.1	5.8	5.95	0.75268	10	2	50	2.5	1	3	3	2	2	6	4	10	3	9	3	6	3	0	3	3	9	0	0.5	2	0	14	13.5	27.5	29.5	25.85	0	0	0	0
41885	3	Menorca	Punta_Prima	Joan	18	B	18_4	4	NA	B	26	9.1	7.7	8.4	0.75268	10	15	50	2	2	2	1	1	1	3	2	5	1	1	2	3	1	0	1	2	5	0.3	0	0	0	29.7	0	29.7	29.5	25.1886	0	0	0	0
41885	3	Menorca	Punta_Prima	Joan	18	B	18_5	5	NA	B	26	9	7	8	0.75268	15	10	50	1.5	4	2	1	1	1	3	2	5	1	0	1	2	0	0	0	1	3	0	0	0	0	30	0	30	29.5	25.5556	0	0	0	0
41885	3	Menorca	Punta_Prima	Joan	18	B	18_6	6	NA	B	25	11.2	9.5	10.35	0.75268	20	5	50	2	1	2	1	1	1	3	2	5	2	10	3	5	5	0	5	4	9	0	0	0	0.8	24	5.2	29.2	29.5	26.0432	0	0	0.135135	0
41886	3	Menorca	Ses Pedres Blaves	Olga	19	A	19_1	1	NA	B	26	9.2	7.6	8.4	0.75268	20	50	50	4	2	2	3	3	4	5	7	12	2	12	4	6	7	5	12	5	11	0	1	0.5	0	0	28.5	28.5	29.5	25.6852	0.0617284	0	0	0
41886	3	Menorca	Ses Pedres Blaves	Olga	19	A	19_2	2	NA	B	26	8.7	8.5	8.6	0.75268	5	50	50	4	2	3	3	3	3	6	6	12	3	15	4	7	8	4	12	5	12	0	0	0.5	0	0	29.5	29.5	29.5	29.5	0.03125	0	0	0
41886	3	Menorca	Ses Pedres Blaves	Olga	19	A	19_3	3	NA	B	26	8.5	7.3	7.9	0.75268	10	50	50	3	2	2	3	2	3	5	5	10	2	10	3	5	10	4	14	5	10	2	1	0.2	0	0	26.8	26.8	29.5	22.1679	0	0	0	0
41886	3	Menorca	Ses Pedres Blaves	Joan	19	B	19_4	4	NA	B	26	7.2	6.2	6.7	0.75268	50	5	50	1	1	2	1	1	1	3	2	5	1	1	2	3	2	0	2	2	5	0	0	0	0	28.5	1.5	30	29.5	25.4118	0	0	0	0
41886	3	Menorca	Ses Pedres Blaves	Joan	19	B	19_5	5	NA	B	26	6.8	6.2	6.5	0.75268	50	25	50	2.5	1	2	3	1	1	5	2	7	2	3	2	4	9	0	9	4	8	0.5	0	1.7	0	13.5	14.3	27.8	29.5	11.7229	0	0	0	0.120482
41886	3	Menorca	Ses Pedres Blaves	Joan	19	B	19_6	6	NA	B	26	5	4.1	4.55	0.75268	50	50	50	3.5	1	3	2	1	1	5	2	7	3	10	3	6	14	0	14	5	11	0	0	0	0	12	18	30	29.5	15.7143	0	0	0	0
41887	3	Menorca	Punta Galera	Olga	20	A	20_1	1	NA	B	27	8.7	7.8	8.25	0.600282	50	20	30	4.5	3	2	2	4	4	4	8	12	1	9	3	4	8	11	19	5	9	0	0	0	2	0	28	28	29.5	27.7053	0.357895	0	0.0210526	0
41887	3	Menorca	Punta Galera	Olga	20	A	20_2	2	NA	B	26	7.5	8	7.75	0.600282	25	2	50	3.5	2	2	2	2	3	4	5	9	1	9	3	4	5	8	13	5	9	0	0	0	3	0	27	27	29.5	20.52	0.39	0	0.05	0
41887	3	Menorca	Punta Galera	Olga	20	A	20_3	3	NA	B	26	7.6	6.9	7.25	0.600282	20	5	30	3.5	2	2	2	2	3	4	5	9	2	18	4	6	6	7	13	5	11	0	0	1.5	7	0	21.5	21.5	29.5	14.5826	0.347826	0	0	0
41887	3	Menorca	Punta Galera	Joan	20	B	20_4	4	NA	B	26	8.1	9	8.55	0.600282	50	50	50	2.5	1	3	2	1	1	5	2	7	2	23	5	7	11	4	15	5	12	0	0	0.5	0	6	23.5	29.5	29.5	15.3101	0.151899	0	0	0
41887	3	Menorca	Punta Galera	Joan	20	B	20_5	5	NA	B	26	11.1	8.7	9.9	0.600282	20	50	50	2.5	1	3	3	2	1	6	3	9	1	18	4	5	10	1	11	4	9	0	0.5	0.5	0	0	29	29	29.5	22.3614	0.39759	0	0.0120482	0
41887	3	Menorca	Punta Galera	Joan	20	B	20_6	6	NA	B	26	13.8	10.3	12.05	0.600282	10	50	50	4	1	1	3	4	2	4	6	10	1	3	2	3	9	4	13	5	8	0	0	0	4	0	26	26	29.5	19.0244	0.280488	0.219512	0	0
41888	3	Menorca	Isla_des_Colom	Olga	21	A	21_1	1	NA	B	26	9.4	9.2	9.3	0.761751	50	50	50	2.5	1	2	1	1	1	3	2	5	3	7	3	6	5	2	7	4	10	0	2	1	0	0	27	27	29.5	19.125	0	0	0	0
41888	3	Menorca	Isla_des_Colom	Olga	21	A	21_2	2	NA	B	26	8.6	8.1	8.35	0.761751	50	50	50	4	2	2	2	4	4	4	8	12	1	11	4	5	14	6	20	5	10	0	0.5	0	0	6	23.5	29.5	29.5	26.0962	0.240385	0	0	0
41888	3	Menorca	Isla_des_Colom	Olga	21	A	21_3	3	NA	B	26	10.5	8.2	9.35	0.761751	50	1	50	3	2	2	3	3	2	5	5	10	3	12	4	7	4	4	8	4	11	0	0	0	1.6	0	28.4	28.4	29.5	22.334	0.359223	0	0	0
41888	3	Menorca	Isla_des_Colom	Joan	21	B	21_4	4	NA	B	26	13	11.3	12.15	0.761751	50	5	50	3	2	2	1	1	1	3	2	5	3	12	4	7	2	4	6	4	11	0	1	0	1	0	28	28	29.5	23.3333	0.422222	0	0.0111111	0
41888	3	Menorca	Isla_des_Colom	Joan	21	B	21_5	5	NA	B	26	11.8	10	10.9	0.761751	20	20	50	4	1	3	3	1	1	6	2	8	4	21	5	9	12	4	16	5	14	0	0	0	0.2	0	29.8	29.8	29.5	15.9327	0.19802	0	0	0
41888	3	Menorca	Isla_des_Colom	Joan	21	B	21_6	6	NA	B	26	9.3	8.5	8.9	0.761751	5	40	0	2.5	1	2	1	1	1	3	2	5	1	11	4	5	13	0	13	5	10	0	0	0	0	8	22	30	29.5	19.5918	0.0816327	0	0	0
41889	3	Menorca	I. de ses Piques	Olga	22	A	22_1	1	NA	B	26	8.5	6.7	7.6	0.548964	50	1	50	2	2	2	3	1	1	5	2	7	2	10	3	5	2	0	2	2	7	0	0	0.5	0.5	11	18	29	29.5	20.9562	0.437956	0	0	0
41889	3	Menorca	I. de ses Piques	Olga	22	A	22_2	2	NA	B	26	6.5	5.9	6.2	0.548964	50	1	50	2	2	1	3	2	1	4	3	7	3	17	4	7	1	0	1	2	9	0	0	0.5	0.2	11	18.3	29.3	29.5	19.6255	0.349057	0	0	0
41889	3	Menorca	I. de ses Piques	Olga	22	A	22_3	3	NA	B	26	6.5	6	6.25	0.548964	50	40	50	2	2	3	2	1	1	5	2	7	4	21	5	9	1	0	1	2	11	0	0	7	0	2	21	23	29.5	14.6364	0.204545	0	0	0.102273
41889	3	Menorca	I. de ses Piques	Joan	22	B	22_4	4	NA	B	26	6.1	5	5.55	0.548964	50	25	50	3	1	2	1	1	1	3	2	5	2	7	3	5	5	5	10	4	9	0	11.3	0	0	0	18.7	18.7	29.5	12.5901	0.178218	0	0	0
41889	3	Menorca	I. de ses Piques	Joan	22	B	22_5	5	NA	B	26	5.8	4.7	5.25	0.548964	50	50	50	2	1	2	1	1	1	3	2	5	2	2	2	4	3	1	4	3	7	0	0	2	0	8	20	28	29.5	21.5385	0.263736	0	0	0
41889	3	Menorca	I. de ses Piques	Joan	22	B	22_6	6	NA	B	26	5.6	4.7	5.15	0.548964	50	50	50	3.5	1	3	2	2	1	5	3	8	3	4	2	5	11	5	16	5	10	0	0	0.5	0	0	29.5	29.5	29.5	24.1106	0.259615	0	0	0
41890	3	Menorca	I. de ses Piques	Olga	23	A	23_1	1	NA	B	26	9.2	8.5	8.85	0.807823	50	50	50	2	2	1	1	2	2	2	4	6	1	2	2	3	1	0	1	2	5	0	0	0	0.5	20	9.5	29.5	29.5	22.2591	0.209091	0	0	0
41890	3	Menorca	I. de ses Piques	Olga	23	A	23_2	2	NA	B	26	11.5	10.5	11	0.807823	5	50	50	3	2	4	2	2	1	6	3	9	4	21	5	9	5	1	6	4	13	0	0	0	5	0	25	25	29.5	19.2529	0.0574713	0	0	0
41890	3	Menorca	I. de ses Piques	Olga	23	A	23_3	3	NA	B	26	9	8.8	8.9	0.807823	50	50	50	1	1	1	1	1	2	2	3	5	1	0	1	2	0	0	0	1	3	0	0	0	0	30	0	30	29.5	26.7033	0.252747	0	0.010989	0
41890	3	Menorca	I. de ses Piques	Joan	23	B	23_4	4	NA	B	26	10.7	9.8	10.25	0.807823	50	10	50	2	1	2	2	1	1	4	2	6	1	0	1	2	0	0	0	1	3	0	0	0	0.5	29.5	0	29.5	29.5	23.9505	0.0792079	0	0.128713	0
41890	3	Menorca	I. de ses Piques	Joan	23	B	23_5	5	NA	B	26	12.2	10.8	11.5	0.807823	50	5	30	3	1	2	2	3	2	4	5	9	1	1	2	3	3	1	4	3	6	1.5	0	0	0	20.5	8	28.5	29.5	22.0099	0.0990099	0	0.108911	0
41890	3	Menorca	I. de ses Piques	Joan	23	B	23_6	6	NA	B	26	7.5	8.5	8	0.807823	40	20	50	1.5	1	2	1	2	1	3	3	6	2	0	1	3	0	0	0	1	4	0	0.9	0	0	28.1	1	29.1	29.5	24.9429	0.180952	0	0.0380952	0
41891	3	Menorca	Illot_Tirant	Olga	24	A	24_1	1	NA	B	26	10.4	9	9.7	0.93827	30	5	50	2.5	2	2	2	2	2	4	4	8	2	23	5	7	6	3	9	4	11	0.8	0	1.2	0	2	26	28	29.5	23.561	0.0853659	0	0.0121951	0
41891	3	Menorca	Illot_Tirant	Olga	24	A	24_2	2	NA	B	26	8.5	7.5	8	0.93827	15	10	50	1.5	2	2	2	1	1	4	2	6	2	5	2	4	0	0	0	1	5	0	0	1	0	19	10	29	29.5	17.0947	0.157895	0	0.0105263	0
41891	3	Menorca	Illot_Tirant	Olga	24	A	24_3	3	NA	B	26	8.2	6.7	7.45	0.93827	5	15	50	1.5	2	1	2	1	1	3	2	5	1	2	2	3	0	0	0	1	4	0	0	0.5	0	28	1.5	29.5	29.5	24.037	0.17284	0	0	0
41891	3	Menorca	Illot_Tirant	Joan	24	B	24_4	4	NA	B	26	9.9	8.2	9.05	0.93827	20	10	50	1.5	1	3	2	1	1	5	2	7	1	0	1	2	0	0	0	1	3	0	0	0	1.5	28.5	0	28.5	29.5	25.733	0.213592	0	0.106796	0.038835
41891	3	Menorca	Illot_Tirant	Joan	24	B	24_5	5	NA	B	26	7.5	5	6.25	0.93827	15	5	50	1.5	2	2	1	1	1	3	2	5	2	0	1	3	0	0	0	1	4	0	0	0	0	30	0	30	29.5	22.268	0.0721649	0	0.0927835	0
41891	3	Menorca	Illot_Tirant	Joan	24	B	24_6	6	NA	B	26	11.3	10	10.65	0.93827	15	50	50	2.5	1	3	2	2	2	5	4	9	2	7	3	5	3	5	8	4	9	0	0	0	0	14	16	30	29.5	25.8416	0.346535	0	0	0
41898	4	Mallorca	Ratjoli	Joan	25	A	25_1	1	NA	B	27	9.1	nd	9.1	0.617456	50	50	50	2.5	1	2	3	2	2	5	4	9	2	1	2	4	4	1	5	4	8	0	0	0	0	22	8	30	29.5	27.027	0	0.279279	0.306306	0
41898	4	Mallorca	Ratjoli	Joan	25	A	25_2	2	NA	B	27	7.5	6.2	6.85	0.617456	50	50	50	2	1	2	1	2	1	3	3	6	2	0	1	3	0	0	0	1	4	0	0.5	0	0	29.5	0	29.5	29.5	29.5	0	0.243478	0.295652	0
41898	4	Mallorca	Ratjoli	Joan	25	A	25_3	3	NA	B	27	7.5	5	6.25	0.617456	50	50	50	2.5	1	2	1	1	2	3	3	6	2	3	2	4	3	2	5	4	8	0	0.3	0	0	21	8.7	29.7	29.5	26.73	0	0.190909	0.254545	0
41898	4	Mallorca	Ratjoli	Olga	25	B	25_4	4	NA	B	27	11.1	9.1	10.1	0.617456	20	2	50	3	2	1	1	2	2	2	4	6	1	16	4	5	12	1	13	5	10	0	0	0	0	0	30	30	29.5	30	0	0.258065	0.258065	0
41898	4	Mallorca	Ratjoli	Olga	25	B	25_5	5	NA	B	27	7.6	7	7.3	0.617456	25	30	50	3	2	1	1	1	2	2	3	5	1	21	5	6	7	5	12	5	11	0	0	0.5	0	0	29.5	29.5	29.5	29.5	0	0.223214	0.1875	0.133929
41898	4	Mallorca	Ratjoli	Olga	25	B	25_6	6	NA	B	27	9.3	9.2	9.25	0.617456	50	15	50	3	1	1	2	2	1	3	3	6	2	9	3	5	6	0	6	4	9	0	0	0.2	0	0	29.8	29.8	29.5	28.7044	0	0.272059	0.323529	0
41899	4	Mallorca	Es Pitxat	Joan	26	A	26_1	1	NA	B	27	6	4.6	5.3	0.438596	30	20	50	2	1	2	2	2	1	4	3	7	2	10	3	5	6	3	9	4	9	3	0	0.2	0	0	26.8	26.8	29.5	18.9833	0	0	0.0166667	0.308333
41899	4	Mallorca	Es Pitxat	Joan	26	A	26_2	2	NA	B	27	6.5	5.2	5.85	0.438596	15	10	50	3	1	3	3	2	2	6	4	10	3	12	4	7	5	4	9	4	11	0	0	0	0	0	30	30	29.5	20.625	0	0.125	0.0625	0
41899	4	Mallorca	Es Pitxat	Joan	26	A	26_3	3	NA	B	27	7	5.3	6.15	0.438596	20	5	50	3	1	3	3	3	2	6	5	11	3	10	3	6	6	5	11	4	10	0	0	0.4	0	0	29.6	29.6	29.5	24.7119	0	0.0550459	0.165138	0
41899	4	Mallorca	Es Pitxat	Olga	26	B	26_4	4	NA	B	27	8.4	6.6	7.5	0.438596	50	1	15	3	2	1	1	2	2	2	4	6	1	2	2	3	1	8	9	4	7	1.5	0.2	0	2.5	0	25.8	25.8	29.5	21.1091	0	0.040404	0.141414	0
41899	4	Mallorca	Es Pitxat	Olga	26	B	26_5	5	NA	B	26	9.1	8.3	8.7	0.438596	50	0	50	3	2	2	2	3	3	4	6	10	2	16	4	6	8	2	10	4	10	0	0.7	0.3	2.5	0	26.5	26.5	29.5	24.3099	0	0.0330579	0.190083	0
41899	4	Mallorca	Es Pitxat	Olga	26	B	26_6	6	NA	B	27	7	7.5	7.25	0.438596	50	1	50	1	2	1	2	1	1	3	2	5	1	1	2	3	1	0	1	2	5	0	0	0	0	28	2	30	29.5	24.3038	0	0.0126582	0.0253165	0
41900	4	Mallorca	Dragonera	Olga	27	A	27_1	1	NA	B	27	6.5	5.7	6.1	0.582773	15	1	30	1	2	1	1	2	3	2	5	7	1	2	2	3	0	0	0	1	4	0	0	0	6.5	22	1.5	23.5	29.5	23.5	0.0162602	0.0162602	0.0487805	0
41900	4	Mallorca	Dragonera	Olga	27	A	27_2	2	NA	B	27	6.7	5.2	5.95	0.582773	5	0	50	3	2	2	2	3	3	4	6	10	3	9	3	6	4	4	8	4	10	0.3	0.3	1	9.5	0	18.9	18.9	29.5	15.0289	0.0120482	0.0240964	0	0
41900	4	Mallorca	Dragonera	Olga	27	A	27_3	3	NA	B	27	6.8	5.9	6.35	0.582773	5	0	50	2.5	2	1	1	2	2	2	4	6	1	6	3	4	8	7	15	5	9	0	0	0	4.5	14	11.5	25.5	29.5	17.6538	0.131868	0.0989011	0	0
41900	4	Mallorca	Dragonera	Joan	27	B	27_4	4	NA	B	27	6.3	4.5	5.4	0.582773	5	1	35	3	2	1	2	3	3	3	6	9	1	2	2	3	1	4	5	4	7	0	0	0	6	13	11	24	29.5	20.177	0	0.141593	0	0
41900	4	Mallorca	Dragonera	Joan	27	B	27_5	5	NA	B	27	8.2	5.7	6.95	0.582773	10	20	25	2	3	1	1	2	2	2	4	6	1	0	1	2	0	0	0	1	3	0	0	0	4	26	0	26	29.5	23.3175	0	0.0952381	0	0.0634921
41900	4	Mallorca	Dragonera	Joan	27	B	27_6	6	NA	B	27	8	6.5	7.25	0.582773	35	0	25	1.5	1	2	1	2	2	3	4	7	1	3	2	3	0	0	0	1	4	0	0	0	8.5	20	1.5	21.5	0	18.6648	0.120879	0.032967	0	0.032967
41901	4	Mallorca	Cala Jump	Joan	28	A	28_1	1	NA	B	27	7	6	6.5	0.319501	15	10	0	2	1	2	2	1	1	4	2	6	2	8	3	5	13	1	14	5	10	0	0	7	0	0	23	23	29.5	20.2315	0.37037	0.0555556	0.12963	0.0740741
41901	4	Mallorca	Cala Jump	Joan	28	A	28_2	2	NA	B	27	6.8	4.3	5.55	0.319501	10	5	0	3.5	2	4	3	2	2	7	4	11	2	14	4	6	5	6	11	4	10	0	0	2	0	4	24	28	29.5	25.2277	0.356436	0.0990099	0	0
41901	4	Mallorca	Cala Jump	Joan	28	A	28_3	3	NA	B	27	6.7	5	5.85	0.319501	20	5	0	3.5	2	2	2	3	3	4	6	10	1	4	2	3	5	4	9	4	7	0	1	0.5	0	10	18.5	28.5	29.5	25.8853	0.321101	0.0183486	0.0458716	0
41901	4	Mallorca	Cala Jump	Olga	28	B	28_4	4	NA	B	27	6	5.5	5.75	0.319501	20	1	30	2	2	5	4	2	0	9	2	11	5	9	3	8	0	0	0	1	9	0	0	0	0.8	0	29.2	29.2	29.5	18.7714	0.0428571	0.0857143	0.257143	0
41901	4	Mallorca	Cala Jump	Olga	28	B	28_5	5	NA	B	27	0	7.5	3.75	0.319501	15	3	50	1	5	2	2	2	1	4	3	7	1	3	2	3	7	0	7	4	7	0	0	21.5	0	0	8.5	8.5	29.5	5.37755	0	0.163265	0.336735	0.0102041
41901	4	Mallorca	Cala Jump	Olga	28	B	28_6	6	NA	B	27	8.1	9.5	8.8	0.319501	5	40	50	2	2	4	3	2	1	7	3	10	3	20	5	8	3	0	3	3	11	0	0	8	0	0	22	22	29.5	17.3191	0	0.180851	0.191489	0
41902	4	Mallorca	Total	Olga	29	A	29_1	1	NA	B	27	7.5	6.8	7.15	0.480029	20	1	50	4	2	2	2	4	4	4	8	12	1	9	3	4	11	6	17	5	9	0	0	0.8	0.5	0	28.7	28.7	29.5	22.0944	0.031746	0.0714286	0	0
41902	4	Mallorca	Total	Olga	29	A	29_2	2	NA	B	27		5.9	5.9	0.480029	20	0	50	3	3	2	2	2	2	4	4	8	1	13	4	5	7	4	11	4	9	1	0.2	0	7	0	21.8	21.8	29.5	16.9011	0.0449438	0.0561798	0.0224719	0
41902	4	Mallorca	Total	Olga	29	A	29_3	3	NA	B	27	8.4	7.2	7.8	0.480029	1	1	50	1.5	3	1	1	2	1	2	3	5	1	4	2	3	2	0	2	2	5	0	0	0	1	21	8	29	29.5	15.8737	0	0	0.0105263	0.0315789
41902	4	Mallorca	Total	Joan	29	B	29_4	4	NA	B	27	8	7	7.5	0.480029	15	5	50	1.5	2	2	3	3	2	5	5	10	2	5	2	4	3	3	6	4	8	0	0	0	0	11	19	30	29.5	23.7391	0.0347826	0.0869565	0	0
41902	4	Mallorca	Total	Joan	29	B	29_5	5	NA	B	27	8.1	6	7.05	0.480029	20	5	25	3	2	1	2	3	3	3	6	9	1	9	3	4	8	5	13	5	9	0	0	0	1	3	26	29	29.5	24.6226	0	0.0283019	0	0
41902	4	Mallorca	Total	Joan	29	B	29_6	6	NA	B	27	7	5.8	6.4	0.480029	20	15	50	3.5	1	3	3	2	2	6	4	10	2	12	4	6	8	4	12	5	11	0	0	1	0	2	27	29	29.5	20.2121	0	0.10101	0	0
41903	4	Mallorca	El_Toro	Joan	30	A	30_1	1	NA	B	27	7.4	5.2	6.3	0.404278	15	3	50	1	3	2	1	1	1	3	2	5	1	0	1	2	0	0	0	1	3	0	0	0	0	30	0	30	29.5	22.844	0.33945	0.0275229	0	0
41903	4	Mallorca	El_Toro	Joan	30	A	30_2	2	NA	B	27	6.3	6	6.15	0.404278	30	15	50	1	2	2	1	1	1	3	2	5	1	0	1	2	0	0	0	1	3	0	0	0	0	30	0	30	29.5	25.8537	0.203252	0.0325203	0	0
41903	4	Mallorca	El_Toro	Joan	30	A	30_3	3	NA	B	27	6.6	5.7	6.15	0.404278	25	5	50	1.5	1	2	1	1	1	3	2	5	1	0	1	2	0	0	0	1	3	0	0	0	0	30	0	30	29.5	26.0417	0.215278	0.0347222	0.0277778	0
41903	4	Mallorca	El_Toro	Olga	30	B	30_4	4	NA	B	27	7.8	7.3	7.55	0.404278	20	5	50	1.5	2	1	1	2	1	2	3	5	1	0	1	2	1	1	2	2	4	0	0	0	0	28	2	30	29.5	24.466	0.300971	0.0776699	0	0
41903	4	Mallorca	El_Toro	Olga	30	B	30_5	5	NA	B	27	8.4	7	7.7	0.404278	40	40	50	1	2	1	1	1	1	2	2	4	1	0	1	2	0	0	0	1	3	0	0	0	0	30	0	30	29.5	22.0482	0.337349	0.0722892	0.0120482	0
41903	4	Mallorca	El_Toro	Olga	30	B	30_6	6	NA	B	27	9.8	8.6	9.2	0.404278	50	20	50	1	2	1	1	1	2	2	3	5	1	0	1	2	0	1	1	2	4	0	0	0	0	28	2	30	29.5	19.5181	0.277108	0.0240964	0.0240964	0
41904	4	Mallorca	Malgrats	Olga	31	A	31_1	1	NA	B	27	8.3	7.9	8.1	0.321243	5	5	50	1.5	2	2	1	1	1	3	2	5	4	8	3	7	0	0	0	1	8	0	0	7	0	13	10	23	29.5	14.3049	0.292683	0.0365854	0.0365854	0
41904	4	Mallorca	Malgrats	Olga	31	A	31_2	2	NA	B	27	10.3	9.4	9.85	0.321243	0	5	50	1.5	3	2	1	1	1	3	2	5	2	4	2	4	0	0	0	1	5	0	0	2.2	0	21	6.8	27.8	29.5	12.9733	0.04	0	0.0533333	0
41904	4	Mallorca	Malgrats	Olga	31	A	31_3	3	NA	B	27	10	8.7	9.35	0.321243	0	10	50	1	3	2	1	1	1	3	2	5	2	5	2	4	0	0	0	1	5	0	0	2	0	25	3	28	29.5	25.8696	0.152174	0	0.0217391	0
41904	4	Mallorca	Malgrats	Joan	31	B	31_4	4	NA	B	27	6.5	6.1	6.3	0.321243	7	7	50	1.5	1	2	2	1	1	4	2	6	2	7	3	5	0	0	0	1	6	0	0	1	0	22	7	29	29.5	23.8824	0.0420168	0.0672269	0	0.092437
41904	4	Mallorca	Malgrats	Joan	31	B	31_5	5	NA	B	27	6.5	5	5.75	0.321243	5	5	50	2.5	2	1	1	2	2	2	4	6	2	1	2	4	1	0	1	2	6	0	0	0	0	28	2	30	29.5	26.2162	0.036036	0.0540541	0	0
41904	4	Mallorca	Malgrats	Joan	31	B	31_6	6	NA	B	27	6	5.2	5.6	0.321243	10	15	50	1	1	2	1	1	1	3	2	5	1	0	1	2	0	0	0	1	3	0	0	0	0	30	0	30	29.5	19.1667	0.037037	0	0	0
41905	4	Mallorca	Dragonera_Llevant	Joan	32	A	32_1	1	NA	B	26	7	6.2	6.6	0.375683	3	5	50	3.5	1	3	3	2	1	6	3	9	3	14	4	7	8	2	10	4	11	0	0	0	0	4	26	30	29.5	21.8182	0.254545	0	0	0
41905	4	Mallorca	Dragonera_Llevant	Joan	32	A	32_2	2	NA	B	27	9.5	7.3	8.4	0.375683	5	5	50	4	2	2	2	4	3	4	7	11	2	6	3	5	10	4	14	5	10	0	0	0.2	0	2	27.8	29.8	29.5	21.1372	0.302326	0.127907	0	0
41905	4	Mallorca	Dragonera_Llevant	Joan	32	A	32_3	3	NA	B	27	8.2	6.2	7.2	0.375683	7	0	50	2	1	3	2	2	2	5	4	9	3	11	4	7	5	1	6	4	11	0	2	0	4	0	24	24	29.5	16.4571	0.219048	0.209524	0	0
41905	4	Mallorca	Dragonera_Llevant	Olga	32	B	32_4	4	NA	B	27	7.7	6	6.85	0.375683	1	50	50	4	2	2	3	4	4	5	8	13	3	9	3	6	5	5	10	4	10	0	0	0	0	5.5	24.5	30	29.5	21.3084	0.17757	0.317757	0.00934579	0
41905	4	Mallorca	Dragonera_Llevant	Olga	32	B	32_5	5	NA	B	27	8.3	7.3	7.8	0.375683	1	10	20	3.5	2	3	4	3	3	7	6	13	3	11	4	7	7	3	10	4	11	0	0	0	0	3	27	30	29.5	23.4	0.31	0.24	0	0
41905	4	Mallorca	Dragonera_Llevant	Olga	32	B	32_6	6	NA	M	27	8.3	7.5	7.9	0.375683	2	50	50	1.5	2	2	2	2	2	4	4	8	2	4	2	4	1	1	2	2	6	0	0.5	0.5	0	24	5	29	29.5	17.1977	0.174419	0.197674	0	0
[truncated: 28 more columns]
