# Supplementary material for: Fish nursery value of algae habitats in temperate coastal reefs
Source: PeerJ. 2019 May 15;7:e6797. doi: 10.7717/peerj.6797 (PMC6525592; doi:10.7717/peerj.6797)
Supplement: Dataset S4 — Dataset of prey sizes by taxonomic groups found within stomach samples of the three study species. [file peerj-07-6797-s006.xlsx]

## Sheet: Symphodus o.
Lno	FishID	Image	FishSp	Pixel	Taxa	Mag	cal	lengthf	lengthp
2	23	1_x2.5_29mm_1.tif	Symphodus	0.196	Acari	2.5	0.39	29	0.502564
8	23	1_x2.5_29mm_1.tif	Symphodus	0.16	Acari	2.5	0.39	29	0.410256
6	23	2_x3.2_29mm_1.tif	Symphodus	0.179	Acari	3.2	0.494	29	0.362348
1	23	6_x3.2_29mm_1.tif	Symphodus	0.28	Acari	3.2	0.494	29	0.566802
4	25	1_x2.0_55mm_1.tif	Symphodus	0.175	Acari	2	0.31	55	0.564516
5	25	1_x2.0_55mm_1.tif	Symphodus	0.117	Acari	2	0.31	55	0.377419
34	27	5_x1.6_46mm_3.tif	Symphodus	0.131	Acari	1.6	0.247	46	0.530364
2	30	12_x1.6_60mm_6.tif	Symphodus	0.145	Acari	1.6	0.247	60	0.587045
3	30	12_x1.6_60mm_6.tif	Symphodus	0.126	Acari	1.6	0.247	60	0.510121
25	32	15_x1.25_50mm_8.tif	Symphodus	0.161	Acari	1.25	0.153	50	1.05229
35	34	20_x1.25_62mm_10.tif	Symphodus	0.19	Acari	1.25	0.153	62	1.24183
36	34	20_x1.25_62mm_10.tif	Symphodus	0.146	Acari	1.25	0.153	62	0.954248
27	35	22_x1.6_53mm_11.tif	Symphodus	0.125	Acari	1.6	0.247	53	0.506073
28	35	22_x1.6_53mm_11.tif	Symphodus	0.13	Acari	1.6	0.247	53	0.526316
13	36	1_x2.0_41mm_1.tif	Symphodus	0.151	Acari	2	0.31	41	0.487097
14	36	1_x2.0_41mm_1.tif	Symphodus	0.188	Acari	2	0.31	41	0.606452
15	36	1_x2.0_41mm_1.tif	Symphodus	0.2	Acari	2	0.31	41	0.645161
16	36	1_x2.0_41mm_1.tif	Symphodus	0.175	Acari	2	0.31	41	0.564516
12	36	1_x2.0_41mm_1.tif	Symphodus	0.17	Acari	2	0.31	41	0.548387
12	39	5_x1.6_47mm_5.tif	Symphodus	0.185	Acari	1.6	0.247	47	0.748988
12	40	6_x1.6_43mm_6.tif	Symphodus	0.183	Acari	1.6	0.247	43	0.740891
14	40	6_x1.6_43mm_6.tif	Symphodus	0.171	Acari	1.6	0.247	43	0.692308
16	42	8_x2.0_38mm_8_.tif	Symphodus	0.115	Acari	2	0.31	38	0.370968
13	42	8_x2.0_38mm_8_.tif	Symphodus	0.17	Acari	2	0.31	38	0.548387
2	4	20_x6.3_41_4.tif	Symphodus	0.51	Acari	6.3	0.98	41	0.520408
1	4	21_x6.3_41_4.tif	Symphodus	0.597	Acari	6.3	0.98	41	0.609184
37	5	24_x2.5_36_.5tif.tif	Symphodus	0.205	Acari	2.5	0.39	36	0.525641
38	5	24_x2.5_36_.5tif.tif	Symphodus	0.19	Acari	2.5	0.39	36	0.487179
39	5	24_x2.5_36_.5tif.tif	Symphodus	0.199	Acari	2.5	0.39	36	0.510256
1	7	25.b_x8_38_7.tif	Symphodus	0.518	Acari	8	1.247	38	0.415397
35	5	25_x2_36_5.tif	Symphodus	0.159	Acari	2	0.31	36	0.512903
36	5	25_x2_36_5.tif	Symphodus	0.157	Acari	2	0.31	36	0.506452
37	5	25_x2_36_5.tif	Symphodus	0.156	Acari	2	0.31	36	0.503226
28 (1)	5	26_x2_36_5.tif	Symphodus	0.17	Acari	2	0.31	36	0.548387
29 (2)	5	26_x2_36_5.tif	Symphodus	0.112	Acari	2	0.31	36	0.36129
5	8	38_x5_33_8.tif	Symphodus	0.409	Acari	5	0.78	33	0.524359
3	10	50_x4_33_10.tif	Symphodus	0.388	Acari	4	0.617	33	0.628849
8	10	52_x3.2_33_10.tif	Symphodus	0.186	Acari	3.2	0.494	33	0.376518
9	10	52_x3.2_33_10.tif	Symphodus	0.175	Acari	3.2	0.494	33	0.354251
8	12	58_x5_38_12.tif	Symphodus	0.357	Acari	5	0.78	38	0.457692
9	12	58_x5_38_12.tif	Symphodus	0.29	Acari	5	0.78	38	0.371795
9	12	63_x5_38_12.tif	Symphodus	0.41	Acari	5	0.78	38	0.525641
1	12	64_x8_38_12.tif	Symphodus	0.634	Acari	8	1.247	38	0.50842
1	13	69_x3.2_26_13.tif	Symphodus	0.268	Acari	3.2	0.494	26	0.54251
1	18	115_x8_31_18.tif	Symphodus	0.38	Acari	8	1.247	31	0.304731
7	19	133_x4_32_19.tif	Symphodus	0.223	Acari	4	0.617	32	0.361426
1	20	147_x10_35_20.tif	Symphodus	0.827	Acari	10	1.56	35	0.530128
1	16	98_x6.3_28_16.tif	Symphodus	0.502	Acari	6.3	0.98	28	0.512245
7	26	4_x1.25_58mm_2.tif	Symphodus	0.243	Amphipoda	1.25	0.153	58	1.58824
57	27	7_x1.25_46mm_3.tif	Symphodus	0.337	Amphipoda	1.25	0.153	46	2.20261
58	27	7_x1.25_46mm_3.tif	Symphodus	0.304	Amphipoda	1.25	0.153	46	1.98693
59	27	7_x1.25_46mm_3.tif	Symphodus	0.158	Amphipoda	1.25	0.153	46	1.03268
60	27	7_x1.25_46mm_3.tif	Symphodus	0.402	Amphipoda	1.25	0.153	46	2.62745
1	28	9_x1.6_60mm_4.tif	Symphodus	0.249	Amphipoda	1.6	0.247	60	1.0081
17	28	9_x1.6_60mm_4.tif	Symphodus	0.213	Amphipoda	1.6	0.247	60	0.862348
18	28	9_x1.6_60mm_4.tif	Symphodus	0.268	Amphipoda	1.6	0.247	60	1.08502
9	30	12_x1.6_60mm_6.tif	Symphodus	0.834	Amphipoda	1.6	0.247	60	3.37652
10	30	12_x1.6_60mm_6.tif	Symphodus	0.3	Amphipoda	1.6	0.247	60	1.21457
12	31	14_x1.25_67mm_7.tif	Symphodus	0.402	Amphipoda	1.25	0.153	67	2.62745
26	32	15_x1.25_50mm_8.tif	Symphodus	0.319	Amphipoda	1.25	0.153	50	2.08497
19	33	17_x1.0_54mm_9.tif	Symphodus	0.231	Amphipoda	1	0.153	54	1.5098
20	33	17_x1.0_54mm_9.tif	Symphodus	0.343	Amphipoda	1	0.153	54	2.24183
21	33	17_x1.0_54mm_9.tif	Symphodus	0.291	Amphipoda	1	0.153	54	1.90196
22	33	17_x1.0_54mm_9.tif	Symphodus	0.251	Amphipoda	1	0.153	54	1.64052
23	33	17_x1.0_54mm_9.tif	Symphodus	0.262	Amphipoda	1	0.153	54	1.71242
1	33	18_x1.25_54mm_9.tif	Symphodus	0.301	Amphipoda	1.25	0.153	54	1.96732
2	33	18_x1.25_54mm_9.tif	Symphodus	0.445	Amphipoda	1.25	0.153	54	2.9085
3	33	18_x1.25_54mm_9.tif	Symphodus	0.362	Amphipoda	1.25	0.153	54	2.36601
4	33	18_x1.25_54mm_9.tif	Symphodus	0.247	Amphipoda	1.25	0.153	54	1.61438
5	33	18_x1.25_54mm_9.tif	Symphodus	0.312	Amphipoda	1.25	0.153	54	2.03922
6	33	18_x1.25_54mm_9.tif	Symphodus	0.26	Amphipoda	1.25	0.153	54	1.69935
7	33	18_x1.25_54mm_9.tif	Symphodus	0.483	Amphipoda	1.25	0.153	54	3.15686
8	33	18_x1.25_54mm_9.tif	Symphodus	0.253	Amphipoda	1.25	0.153	54	1.65359
9	33	18_x1.25_54mm_9.tif	Symphodus	0.322	Amphipoda	1.25	0.153	54	2.10458
25	34	19_x1.25_62mm_10.tif	Symphodus	0.447	Amphipoda	1.25	0.153	62	2.92157
39	34	20_x1.25_62mm_10.tif	Symphodus	0.373	Amphipoda	1.25	0.153	62	2.43791
40	34	20_x1.25_62mm_10.tif	Symphodus	0.303	Amphipoda	1.25	0.153	62	1.98039
14	34	21_x2.0_62mm_10.tif	Symphodus	0.606	Amphipoda	2	0.31	62	1.95484
26	35	22_x1.6_53mm_11.tif	Symphodus	0.254	Amphipoda	1.6	0.247	53	1.02834
31	35	22_x1.6_53mm_11.tif	Symphodus	0.508	Amphipoda	1.6	0.247	53	2.05668
15	10	52_x3.2_33_10.tif	Symphodus	0.12	Bivaliva	3.2	0.494	33	0.242915
16	10	52_x3.2_33_10.tif	Symphodus	0.135	Bivaliva	3.2	0.494	33	0.273279
17	10	52_x3.2_33_10.tif	Symphodus	0.133	Bivaliva	3.2	0.494	33	0.269231
18	10	52_x3.2_33_10.tif	Symphodus	0.128	Bivaliva	3.2	0.494	33	0.259109
19	10	52_x3.2_33_10.tif	Symphodus	0.093	Bivaliva	3.2	0.494	33	0.188259
20	10	52_x3.2_33_10.tif	Symphodus	0.097	Bivaliva	3.2	0.494	33	0.196356
21	10	52_x3.2_33_10.tif	Symphodus	0.12	Bivaliva	3.2	0.494	33	0.242915
22	10	52_x3.2_33_10.tif	Symphodus	0.141	Bivaliva	3.2	0.494	33	0.285425
1	20	154_x10_35_20.tif	Symphodus	0.301	Bivaliva	10	1.56	35	0.192949
26	28	9_x1.6_60mm_4.tif	Symphodus	0.384	Bivaliva	1.6	0.247	60	1.55466
4	37	3_x2.0_50mm_3.tif	Symphodus	0.417	Bivaliva	2	0.31	50	1.34516
1	19	139_x8_32_19.tif	Symphodus	0.522	Crustacea appendages	8	1.247	32	0.418605
5	9	23_x4_34_9.tif	Symphodus	0.127	Foraminifera	4	0.617	34	0.205835
5	7	32_x5_38_7.tif	Symphodus	0.21	Foraminifera	5	0.78	38	0.269231
6	7	32_x5_38_7.tif	Symphodus	0.148	Foraminifera	5	0.78	38	0.189744
7	7	32_x5_38_7.tif	Symphodus	0.149	Foraminifera	5	0.78	38	0.191026
8	7	32_x5_38_7.tif	Symphodus	0.205	Foraminifera	5	0.78	38	0.262821
9	7	32_x5_38_7.tif	Symphodus	0.236	Foraminifera	5	0.78	38	0.302564
1	8	37_x5_33_8.tif	Symphodus	0.17	Foraminifera	5	0.78	33	0.217949
3	8	37_x5_33_8.tif	Symphodus	0.208	Foraminifera	5	0.78	33	0.266667
1	8	38_x5_33_8.tif	Symphodus	0.205	Foraminifera	5	0.78	33	0.262821
3	8	38_x5_33_8.tif	Symphodus	0.169	Foraminifera	5	0.78	33	0.216667
9	8	41_x5_33_8.tif	Symphodus	0.171	Foraminifera	5	0.78	33	0.219231
7	9	42_x3.2_34_9.tif	Symphodus	0.151	Foraminifera	3.2	0.494	34	0.305668
8	9	42_x3.2_34_9.tif	Symphodus	0.173	Foraminifera	3.2	0.494	34	0.350202
1	10	47_x4_33_10.tif	Symphodus	0.187	Foraminifera	4	0.617	33	0.303079
2	10	47_x4_33_10.tif	Symphodus	0.137	Foraminifera	4	0.617	33	0.222042
3	10	47_x4_33_10.tif	Symphodus	0.1	Foraminifera	4	0.617	33	0.162075
4	10	47_x4_33_10.tif	Symphodus	0.15	Foraminifera	4	0.617	33	0.243112
12	10	49_x3.2_33_10.tif	Symphodus	0.126	Foraminifera	3.2	0.494	33	0.255061
13	10	49_x3.2_33_10.tif	Symphodus	0.111	Foraminifera	3.2	0.494	33	0.224696
14	10	49_x3.2_33_10.tif	Symphodus	0.107	Foraminifera	3.2	0.494	33	0.216599
15	10	49_x3.2_33_10.tif	Symphodus	0.095	Foraminifera	3.2	0.494	33	0.192308
16	10	49_x3.2_33_10.tif	Symphodus	0.109	Foraminifera	3.2	0.494	33	0.220648
18	10	49_x3.2_33_10.tif	Symphodus	0.16	Foraminifera	3.2	0.494	33	0.323887
11	10	52_x3.2_33_10.tif	Symphodus	0.106	Foraminifera	3.2	0.494	33	0.214575
12	10	52_x3.2_33_10.tif	Symphodus	0.143	Foraminifera	3.2	0.494	33	0.289474
13	10	52_x3.2_33_10.tif	Symphodus	0.124	Foraminifera	3.2	0.494	33	0.251012
14	10	52_x3.2_33_10.tif	Symphodus	0.126	Foraminifera	3.2	0.494	33	0.255061
1	12	55_x4_38_12.tif	Symphodus	0.14	Foraminifera	4	0.617	38	0.226904
2	12	55_x4_38_12.tif	Symphodus	0.143	Foraminifera	4	0.617	38	0.231767
3	12	55_x4_38_12.tif	Symphodus	0.129	Foraminifera	4	0.617	38	0.209076
4	12	55_x4_38_12.tif	Symphodus	0.109	Foraminifera	4	0.617	38	0.176661
5	12	55_x4_38_12.tif	Symphodus	0.116	Foraminifera	4	0.617	38	0.188006
6	12	55_x4_38_12.tif	Symphodus	0.15	Foraminifera	4	0.617	38	0.243112
7	12	55_x4_38_12.tif	Symphodus	0.141	Foraminifera	4	0.617	38	0.228525
8	12	55_x4_38_12.tif	Symphodus	0.113	Foraminifera	4	0.617	38	0.183144
9	12	55_x4_38_12.tif	Symphodus	0.169	Foraminifera	4	0.617	38	0.273906
4	12	57.b_x6.3_38_12.tif	Symphodus	0.245	Foraminifera	6.3	0.98	38	0.25
5	12	57.b_x6.3_38_12.tif	Symphodus	0.247	Foraminifera	6.3	0.98	38	0.252041
11	12	58_x5_38_12.tif	Symphodus	0.209	Foraminifera	5	0.78	38	0.267949
12	12	58_x5_38_12.tif	Symphodus	0.201	Foraminifera	5	0.78	38	0.257692
3	12	59_x6.3_38_12.tif	Symphodus	0.222	Foraminifera	6.3	0.98	38	0.226531
4	12	59_x6.3_38_12.tif	Symphodus	0.191	Foraminifera	6.3	0.98	38	0.194898
5	12	59_x6.3_38_12.tif	Symphodus	0.295	Foraminifera	6.3	0.98	38	0.30102
6	12	59_x6.3_38_12.tif	Symphodus	0.205	Foraminifera	6.3	0.98	38	0.209184
8	12	63_x5_38_12.tif	Symphodus	0.231	Foraminifera	5	0.78	38	0.296154
2	12	64_x8_38_12.tif	Symphodus	0.345	Foraminifera	8	1.247	38	0.276664
3	12	64_x8_38_12.tif	Symphodus	0.227	Foraminifera	8	1.247	38	0.182037
4	14	73_x6.3_26_14.tif	Symphodus	0.289	Foraminifera	6.3	0.98	26	0.294898
3	16	91_x6.3_28_16.tif	Symphodus	0.145	Foraminifera	6.3	0.98	28	0.147959
1	17	103_x8_32_17.tif	Symphodus	0.306	Foraminifera	8	1.247	32	0.245389
2	17	103_x8_32_17.tif	Symphodus	0.174	Foraminifera	8	1.247	32	0.139535
3	17	103_x8_32_17.tif	Symphodus	0.173	Foraminifera	8	1.247	32	0.138733
4	17	103_x8_32_17.tif	Symphodus	0.25	Foraminifera	8	1.247	32	0.200481
2	17	104_x6.3_32_17.tif	Symphodus	0.23	Foraminifera	6.3	0.98	32	0.234694
2	17	106_x6.3_32_17.tif	Symphodus	0.146	Foraminifera	6.3	0.98	32	0.14898
3	17	106_x6.3_32_17.tif	Symphodus	0.626	Foraminifera	6.3	0.98	32	0.638776
1	17	107_x11.5_32_17.tif	Symphodus	0.14	Foraminifera	11.5	1.837	32	0.0762112
1	17	110_x6.3_32_17.tif	Symphodus	0.167	Foraminifera	6.3	0.98	32	0.170408
2	17	111_x8_32_17.tif	Symphodus	0.109	Foraminifera	8	1.247	32	0.0874098
3	17	111_x8_32_17.tif	Symphodus	0.118	Foraminifera	8	1.247	32	0.0946271
1	17	112_x10_32_17.tif	Symphodus	0.348	Foraminifera	10	1.56	32	0.223077
1	17	114_x5_32_17.tif	Symphodus	0.307	Foraminifera	5	0.78	32	0.39359
2	18	115_x8_31_18.tif	Symphodus	0.172	Foraminifera	8	1.247	31	0.137931
1	18	116_x6.3_31_18.tif	Symphodus	0.281	Foraminifera	6.3	0.98	31	0.286735
5	18	117_x5_31_18.tif	Symphodus	0.2	Foraminifera	5	0.78	31	0.25641
1	18	118_x5_31_18.tif	Symphodus	0.184	Foraminifera	5	0.78	31	0.235897
2	18	118_x5_31_18.tif	Symphodus	0.152	Foraminifera	5	0.78	31	0.194872
3	18	118_x5_31_18.tif	Symphodus	0.141	Foraminifera	5	0.78	31	0.180769
3	18	119_x5_31_18.tif	Symphodus	0.114	Foraminifera	5	0.78	31	0.146154
5	18	119_x5_31_18.tif	Symphodus	0.193	Foraminifera	5	0.78	31	0.247436
1	18	120_x6.3_31_18.tif	Symphodus	0.446	Foraminifera	6.3	0.98	31	0.455102
1	18	121_x11.5_31_18.tif	Symphodus	0.224	Foraminifera	11.5	1.837	31	0.121938
1	18	122_x6.3_31_18.tif	Symphodus	0.269	Foraminifera	6.3	0.98	31	0.27449
2	18	122_x6.3_31_18.tif	Symphodus	0.136	Foraminifera	6.3	0.98	31	0.138776
1	18	123_x6.3_31_18.tif	Symphodus	0.213	Foraminifera	6.3	0.98	31	0.217347
2	18	123_x6.3_31_18.tif	Symphodus	0.181	Foraminifera	6.3	0.98	31	0.184694
6	19	128_x5_32_19.tif	Symphodus	0.335	Foraminifera	5	0.78	32	0.429487
1	19	129_x8_32_19.tif	Symphodus	0.279	Foraminifera	8	1.247	32	0.223737
1	19	136_x11.5_32_19.tif	Symphodus	0.433	Foraminifera	11.5	1.837	32	0.23571
1	19	145_x8_32_19.tif	Symphodus	0.294	Foraminifera	8	1.247	32	0.235766
1	20	152_x11.5_35_20.tif	Symphodus	0.147	Foraminifera	11.5	1.837	35	0.0800218
2	20	152_x11.5_35_20.tif	Symphodus	0.185	Foraminifera	11.5	1.837	35	0.100708
1	21	156_x11.5_36_21.tif	Symphodus	0.382	Foraminifera	11.5	1.837	36	0.207948
1	22	167_x10_39_22.tif	Symphodus	0.357	Foraminifera	10	1.56	39	0.228846
4	22	170_x6.3_39_22.tif	Symphodus	0.229	Foraminifera	6.3	0.98	39	0.233673
5	22	170_x6.3_39_22.tif	Symphodus	0.197	Foraminifera	6.3	0.98	39	0.20102
8	22	171_x4_39_22.tif	Symphodus	0.176	Foraminifera	4	0.617	39	0.285251
1	24	8_x3.2_31mm_2.tif	Symphodus	0.163	Foraminifera	3.2	0.494	31	0.32996
2	24	8_x3.2_31mm_2.tif	Symphodus	0.14	Foraminifera	3.2	0.494	31	0.283401
3	24	8_x3.2_31mm_2.tif	Symphodus	0.194	Foraminifera	3.2	0.494	31	0.392713
6	25	1_x2.0_55mm_1.tif	Symphodus	0.125	Foraminifera	2	0.31	55	0.403226
7	25	1_x2.0_55mm_1.tif	Symphodus	0.099	Foraminifera	2	0.31	55	0.319355
8	25	1_x2.0_55mm_1.tif	Symphodus	0.089	Foraminifera	2	0.31	55	0.287097
1	26	11_x5.0_31mm_4.tif	Symphodus	0.209	Foraminifera	5	0.78	31	0.267949
2	26	11_x5.0_31mm_4.tif	Symphodus	0.157	Foraminifera	5	0.78	31	0.201282
1	26	12_x6.3_31mm_4.tif	Symphodus	0.197	Foraminifera	6.3	0.98	31	0.20102
33	27	8_x1.6_46mm_3.tif	Symphodus	0.097	Foraminifera	1.6	0.247	46	0.392713
1	30	12_x1.6_60mm_6.tif	Symphodus	0.181	Foraminifera	1.6	0.247	60	0.732794
4	31	14_x1.25_67mm_7.tif	Symphodus	0.151	Foraminifera	1.25	0.153	67	0.986928
7	31	14_x1.25_67mm_7.tif	Symphodus	0.133	Foraminifera	1.25	0.153	67	0.869281
8	36	1_x2.0_41mm_1.tif	Symphodus	0.273	Foraminifera	2	0.31	41	0.880645
1	37	3_x2.0_50mm_3.tif	Symphodus	0.215	Foraminifera	2	0.31	50	0.693548
1	43	9_x2.5_43mm_9.tif	Symphodus	0.209	Foraminifera	2.5	0.39	43	0.535897
2	43	9_x2.5_43mm_9.tif	Symphodus	0.23	Foraminifera	2.5	0.39	43	0.589744
3	43	9_x2.5_43mm_9.tif	Symphodus	0.248	Foraminifera	2.5	0.39	43	0.635897
8	21	161_x5_36_21.tif	Symphodus	0.126	Foraminifera	5	0.78	36	0.161538
2	1	14_x5_39_1.tif	Symphodus	0.109	Gastropoda	5	0.78	39	0.139744
4	9	23_x4_34_9.tif	Symphodus	0.145	Gastropoda	4	0.617	34	0.235008
2	7	25.b_x8_38_7.tif	Symphodus	0.231	Gastropoda	8	1.247	38	0.185245
42	5	25_x2_36_5.tif	Symphodus	0.112	Gastropoda	2	0.31	36	0.36129
1	7	31_x11.5_38_7.tif	Symphodus	0.325	Gastropoda	11.5	1.837	38	0.176919
2	7	31_x11.5_38_7.tif	Symphodus	0.307	Gastropoda	11.5	1.837	38	0.16712
2	7	33_x6.3_38_7.tif	Symphodus	0.189	Gastropoda	6.3	0.98	38	0.192857
3	7	33_x6.3_38_7.tif	Symphodus	0.178	Gastropoda	6.3	0.98	38	0.181633
4	7	33_x6.3_38_7.tif	Symphodus	0.154	Gastropoda	6.3	0.98	38	0.157143
5	7	33_x6.3_38_7.tif	Symphodus	0.177	Gastropoda	6.3	0.98	38	0.180612
6	7	33_x6.3_38_7.tif	Symphodus	0.212	Gastropoda	6.3	0.98	38	0.216327
7	7	33_x6.3_38_7.tif	Symphodus	0.114	Gastropoda	6.3	0.98	38	0.116327
8	7	33_x6.3_38_7.tif	Symphodus	0.216	Gastropoda	6.3	0.98	38	0.220408
9	7	33_x6.3_38_7.tif	Symphodus	0.152	Gastropoda	6.3	0.98	38	0.155102
10	7	33_x6.3_38_7.tif	Symphodus	0.171	Gastropoda	6.3	0.98	38	0.17449
1	7	34_x8_38_7.tif	Symphodus	0.366	Gastropoda	8	1.247	38	0.293504
2	7	34_x8_38_7.tif	Symphodus	0.244	Gastropoda	8	1.247	38	0.19567
2	8	37_x5_33_8.tif	Symphodus	0.136	Gastropoda	5	0.78	33	0.174359
2	8	38_x5_33_8.tif	Symphodus	0.207	Gastropoda	5	0.78	33	0.265385
5	9	43_x4_34_9.tif	Symphodus	0.163	Gastropoda	4	0.617	34	0.264182
6	9	43_x4_34_9.tif	Symphodus	0.121	Gastropoda	4	0.617	34	0.19611
7	9	43_x4_34_9.tif	Symphodus	0.106	Gastropoda	4	0.617	34	0.171799
8	9	43_x4_34_9.tif	Symphodus	0.133	Gastropoda	4	0.617	34	0.215559
9	9	43_x4_34_9.tif	Symphodus	0.097	Gastropoda	4	0.617	34	0.157212
10	9	43_x4_34_9.tif	Symphodus	0.1	Gastropoda	4	0.617	34	0.162075
3	9	45_x4_34_9.tif	Symphodus	0.113	Gastropoda	4	0.617	34	0.183144
4	9	45_x4_34_9.tif	Symphodus	0.123	Gastropoda	4	0.617	34	0.199352
5	10	47_x4_33_10.tif	Symphodus	0.073	Gastropoda	4	0.617	33	0.118314
6	10	47_x4_33_10.tif	Symphodus	0.127	Gastropoda	4	0.617	33	0.205835
10	10	52_x3.2_33_10.tif	Symphodus	0.127	Gastropoda	3.2	0.494	33	0.257085
1	11	53_x10_36_11.tif	Symphodus	0.383	Gastropoda	10	1.56	36	0.245513
2	11	54_x8_36_11.tif	Symphodus	0.212	Gastropoda	8	1.247	36	0.170008
3	11	54_x8_36_11.tif	Symphodus	0.222	Gastropoda	8	1.247	36	0.178027
4	11	54_x8_36_11.tif	Symphodus	0.264	Gastropoda	8	1.247	36	0.211708
5	11	54_x8_36_11.tif	Symphodus	0.203	Gastropoda	8	1.247	36	0.162791
6	11	54_x8_36_11.tif	Symphodus	0.212	Gastropoda	8	1.247	36	0.170008
4	12	56_x5_38_12.tif	Symphodus	0.277	Gastropoda	5	0.78	38	0.355128
5	12	56_x5_38_12.tif	Symphodus	0.204	Gastropoda	5	0.78	38	0.261538
6	12	56_x5_38_12.tif	Symphodus	0.271	Gastropoda	5	0.78	38	0.347436
7	12	56_x5_38_12.tif	Symphodus	0.222	Gastropoda	5	0.78	38	0.284615
7	12	63_x5_38_12.tif	Symphodus	0.252	Gastropoda	5	0.78	38	0.323077
2	13	68_x5_26_13.tif	Symphodus	0.111	Gastropoda	5	0.78	26	0.142308
3	13	68_x5_26_13.tif	Symphodus	0.114	Gastropoda	5	0.78	26	0.146154
1	13	70_x6.3_26_13.tif	Symphodus	0.172	Gastropoda	6.3	0.98	26	0.17551
2	13	70_x6.3_26_13.tif	Symphodus	0.181	Gastropoda	6.3	0.98	26	0.184694
3	13	70_x6.3_26_13.tif	Symphodus	0.188	Gastropoda	6.3	0.98	26	0.191837
4	13	70_x6.3_26_13.tif	Symphodus	0.193	Gastropoda	6.3	0.98	26	0.196939
5	13	70_x6.3_26_13.tif	Symphodus	0.137	Gastropoda	6.3	0.98	26	0.139796
6	13	70_x6.3_26_13.tif	Symphodus	0.152	Gastropoda	6.3	0.98	26	0.155102
5	13	71_x5_26_13.tif	Symphodus	0.141	Gastropoda	5	0.78	26	0.180769
6	13	71_x5_26_13.tif	Symphodus	0.168	Gastropoda	5	0.78	26	0.215385
2	14	73_x6.3_26_14.tif	Symphodus	0.213	Gastropoda	6.3	0.98	26	0.217347
3	14	73_x6.3_26_14.tif	Symphodus	0.19	Gastropoda	6.3	0.98	26	0.193878
5	14	73_x6.3_26_14.tif	Symphodus	0.134	Gastropoda	6.3	0.98	26	0.136735
6	14	73_x6.3_26_14.tif	Symphodus	0.233	Gastropoda	6.3	0.98	26	0.237755
7	14	73_x6.3_26_14.tif	Symphodus	0.168	Gastropoda	6.3	0.98	26	0.171429
1	15	75_x6.3_28_15.tif	Symphodus	0.198	Gastropoda	6.3	0.98	28	0.202041
2	15	75_x6.3_28_15.tif	Symphodus	0.137	Gastropoda	6.3	0.98	28	0.139796
3	15	75_x6.3_28_15.tif	Symphodus	0.141	Gastropoda	6.3	0.98	28	0.143878
1	15	80_x10_28_15.tif	Symphodus	0.298	Gastropoda	10	1.56	28	0.191026
1	16	81_x11.5_28_16.tif	Symphodus	0.337	Gastropoda	11.5	1.837	28	0.183451
1	16	84_x11.5_28_16.tif	Symphodus	0.265	Gastropoda	11.5	1.837	28	0.144257
2	16	87_x10_28_16.tif	Symphodus	0.302	Gastropoda	10	1.56	28	0.19359
1	16	88_x11.5_28_16.tif	Symphodus	0.23	Gastropoda	11.5	1.837	28	0.125204
1	16	89_x11.5_28_16.tif	Symphodus	0.393	Gastropoda	11.5	1.837	28	0.213936
1	16	90_x10_28_16.tif	Symphodus	0.209	Gastropoda	10	1.56	28	0.133974
2	16	90_x10_28_16.tif	Symphodus	0.376	Gastropoda	10	1.56	28	0.241026
3	16	90_x10_28_16.tif	Symphodus	0.251	Gastropoda	10	1.56	28	0.160897
2	16	92_x10_28_16.tif	Symphodus	0.21	Gastropoda	10	1.56	28	0.134615
1	16	93_x10_28_16.tif	Symphodus	0.335	Gastropoda	10	1.56	28	0.214744
2	16	93_x10_28_16.tif	Symphodus	0.214	Gastropoda	10	1.56	28	0.137179
3	16	93_x10_28_16.tif	Symphodus	0.272	Gastropoda	10	1.56	28	0.174359
2	16	96_x8_28_16.tif	Symphodus	0.82	Gastropoda	8	1.247	28	0.657578
1	16	99_x4_28_16.tif	Symphodus	0.07	Gastropoda	4	0.617	28	0.113452
2	16	99_x4_28_16.tif	Symphodus	0.097	Gastropoda	4	0.617	28	0.157212
1	16	100_x8_28_16.tif	Symphodus	0.244	Gastropoda	8	1.247	28	0.19567
4	16	101_x4_28_16.tif	Symphodus	0.408	Gastropoda	4	0.617	28	0.661264
1	17	105_x6.3_32_17.tif	Symphodus	0.151	Gastropoda	6.3	0.98	32	0.154082
2	17	107_x11.5_32_17.tif	Symphodus	0.24	Gastropoda	11.5	1.837	32	0.130648
5	17	109_x5_32_17.tif	Symphodus	0.354	Gastropoda	5	0.78	32	0.453846
4	18	118_x5_31_18.tif	Symphodus	0.142	Gastropoda	5	0.78	31	0.182051
5	18	118_x5_31_18.tif	Symphodus	0.144	Gastropoda	5	0.78	31	0.184615
3	18	122_x6.3_31_18.tif	Symphodus	0.224	Gastropoda	6.3	0.98	31	0.228571
4	18	122_x6.3_31_18.tif	Symphodus	0.185	Gastropoda	6.3	0.98	31	0.188776
3	18	123_x6.3_31_18.tif	Symphodus	0.131	Gastropoda	6.3	0.98	31	0.133673
4	19	128_x5_32_19.tif	Symphodus	0.28	Gastropoda	5	0.78	32	0.358974
5	19	128_x5_32_19.tif	Symphodus	0.16	Gastropoda	5	0.78	32	0.205128
2	19	139_x8_32_19.tif	Symphodus	0.345	Gastropoda	8	1.247	32	0.276664
2	20	147_x10_35_20.tif	Symphodus	0.285	Gastropoda	10	1.56	35	0.182692
1	20	149_x5_35_20.tif	Symphodus	0.109	Gastropoda	5	0.78	35	0.139744
2	20	149_x5_35_20.tif	Symphodus	0.121	Gastropoda	5	0.78	35	0.155128
3	20	149_x5_35_20.tif	Symphodus	0.153	Gastropoda	5	0.78	35	0.196154
1	20	150_x8_35_20.tif	Symphodus	0.29	Gastropoda	8	1.247	35	0.232558
2	20	150_x8_35_20.tif	Symphodus	0.262	Gastropoda	8	1.247	35	0.210104
3	20	150_x8_35_20.tif	Symphodus	0.175	Gastropoda	8	1.247	35	0.140337
4	20	152_x11.5_35_20.tif	Symphodus	0.319	Gastropoda	11.5	1.837	35	0.173653
1	21	158_x5_36_21.tif	Symphodus	0.153	Gastropoda	5	0.78	36	0.196154
2	21	158_x5_36_21.tif	Symphodus	0.162	Gastropoda	5	0.78	36	0.207692
3	21	158_x5_36_21.tif	Symphodus	0.142	Gastropoda	5	0.78	36	0.182051
4	21	158_x5_36_21.tif	Symphodus	0.111	Gastropoda	5	0.78	36	0.142308
5	21	158_x5_36_21.tif	Symphodus	0.155	Gastropoda	5	0.78	36	0.198718
6	21	158_x5_36_21.tif	Symphodus	0.138	Gastropoda	5	0.78	36	0.176923
7	21	158_x5_36_21.tif	Symphodus	0.13	Gastropoda	5	0.78	36	0.166667
1	21	159_x6.3_36_21.tif	Symphodus	0.22	Gastropoda	6.3	0.98	36	0.22449
2	21	159_x6.3_36_21.tif	Symphodus	0.179	Gastropoda	6.3	0.98	36	0.182653
1	21	160_x11.5_36_21.tif	Symphodus	0.304	Gastropoda	11.5	1.837	36	0.165487
1	21	161_x5_36_21.tif	Symphodus	0.155	Gastropoda	5	0.78	36	0.198718
2	21	161_x5_36_21.tif	Symphodus	0.153	Gastropoda	5	0.78	36	0.196154
3	21	161_x5_36_21.tif	Symphodus	0.158	Gastropoda	5	0.78	36	0.202564
3	21	163_x5_36_21.tif	Symphodus	0.104	Gastropoda	5	0.78	36	0.133333
4	21	163_x5_36_21.tif	Symphodus	0.132	Gastropoda	5	0.78	36	0.169231
2	22	165_x8_39_22.tif	Symphodus	0.301	Gastropoda	8	1.247	39	0.241379
3	22	166_x8_39_22.tif	Symphodus	0.248	Gastropoda	8	1.247	39	0.198877
2	15	76_x6.3_28_15.tif	Symphodus	0.087	Gastropoda	6.3	0.98	28	0.0887755
17	10	49_x3.2_33_10.tif	Symphodus	0.142	Gastropoda	3.2	0.494	33	0.287449
3	16	87_x10_28_16.tif	Symphodus	0.116	Gastropoda	10	1.56	28	0.074359
4	17	109_x5_32_17.tif	Symphodus	0.1	Gastropoda	5	0.78	32	0.128205
1	23	2_x3.2_29mm_1.tif	Symphodus	0.185	Gastropoda	3.2	0.494	29	0.374494
2	23	2_x3.2_29mm_1.tif	Symphodus	0.184	Gastropoda	3.2	0.494	29	0.37247
3	23	2_x3.2_29mm_1.tif	Symphodus	0.14	Gastropoda	3.2	0.494	29	0.283401
4	23	2_x3.2_29mm_1.tif	Symphodus	0.168	Gastropoda	3.2	0.494	29	0.340081
5	23	2_x3.2_29mm_1.tif	Symphodus	0.153	Gastropoda	3.2	0.494	29	0.309717
1	23	4_x4.0_29mm_1.tif	Symphodus	0.2	Gastropoda	4	0.617	29	0.324149
2	23	4_x4.0_29mm_1.tif	Symphodus	0.143	Gastropoda	4	0.617	29	0.231767
3	23	4_x4.0_29mm_1.tif	Symphodus	0.167	Gastropoda	4	0.617	29	0.270665
1	25	10_x2.5_28mm_3.tif	Symphodus	0.13	Gastropoda	2.5	0.39	28	0.333333
1	26	2_x1.6_58mm_2.tif	Symphodus	0.478	Gastropoda	1.6	0.247	58	1.93522
2	26	2_x1.6_58mm_2.tif	Symphodus	0.224	Gastropoda	1.6	0.247	58	0.906883
3	26	2_x1.6_58mm_2.tif	Symphodus	0.281	Gastropoda	1.6	0.247	58	1.13765
4	26	2_x1.6_58mm_2.tif	Symphodus	0.235	Gastropoda	1.6	0.247	58	0.951417
5	26	2_x1.6_58mm_2.tif	Symphodus	0.165	Gastropoda	1.6	0.247	58	0.668016
6	26	2_x1.6_58mm_2.tif	Symphodus	0.234	Gastropoda	1.6	0.247	58	0.947368
1	26	3_x1.6_58mm_2.tif	Symphodus	0.404	Gastropoda	1.6	0.247	58	1.63563
2	26	3_x1.6_58mm_2.tif	Symphodus	0.339	Gastropoda	1.6	0.247	58	1.37247
3	26	3_x1.6_58mm_2.tif	Symphodus	0.279	Gastropoda	1.6	0.247	58	1.12955
4	26	3_x1.6_58mm_2.tif	Symphodus	0.198	Gastropoda	1.6	0.247	58	0.801619
1	26	4_x1.25_58mm_2.tif	Symphodus	0.353	Gastropoda	1.25	0.153	58	2.30719
2	26	4_x1.25_58mm_2.tif	Symphodus	0.274	Gastropoda	1.25	0.153	58	1.79085
3	26	4_x1.25_58mm_2.tif	Symphodus	0.153	Gastropoda	1.25	0.153	58	1
4	26	4_x1.25_58mm_2.tif	Symphodus	0.303	Gastropoda	1.25	0.153	58	1.98039
5	26	4_x1.25_58mm_2.tif	Symphodus	0.321	Gastropoda	1.25	0.153	58	2.09804
6	26	4_x1.25_58mm_2.tif	Symphodus	0.351	Gastropoda	1.25	0.153	58	2.29412
35	27	5_x1.6_46mm_3.tif	Symphodus	0.076	Gastropoda	1.6	0.247	46	0.307692
27	28	9_x1.6_60mm_4.tif	Symphodus	0.135	Gastropoda	1.6	0.247	60	0.546559
24	28	9_x1.6_60mm_4.tif	Symphodus	0.22	Gastropoda	1.6	0.247	60	0.890688
25	28	9_x1.6_60mm_4.tif	Symphodus	0.255	Gastropoda	1.6	0.247	60	1.03239
1	29	10_x1.25_65mm_5.tif	Symphodus	0.324	Gastropoda	1.25	0.153	65	2.11765
2	29	10_x1.25_65mm_5.tif	Symphodus	0.284	Gastropoda	1.25	0.153	65	1.85621
3	29	10_x1.25_65mm_5.tif	Symphodus	0.317	Gastropoda	1.25	0.153	65	2.0719
4	29	10_x1.25_65mm_5.tif	Symphodus	0.257	Gastropoda	1.25	0.153	65	1.67974
5	29	10_x1.25_65mm_5.tif	Symphodus	0.182	Gastropoda	1.25	0.153	65	1.18954
6	29	10_x1.25_65mm_5.tif	Symphodus	0.208	Gastropoda	1.25	0.153	65	1.35948
7	29	10_x1.25_65mm_5.tif	Symphodus	0.17	Gastropoda	1.25	0.153	65	1.11111
8	29	10_x1.25_65mm_5.tif	Symphodus	0.152	Gastropoda	1.25	0.153	65	0.993464
1	29	11_x1.6_65mm_5.tif	Symphodus	0.382	Gastropoda	1.6	0.247	65	1.54656
2	29	11_x1.6_65mm_5.tif	Symphodus	0.331	Gastropoda	1.6	0.247	65	1.34008
3	29	11_x1.6_65mm_5.tif	Symphodus	0.498	Gastropoda	1.6	0.247	65	2.01619
4	29	11_x1.6_65mm_5.tif	Symphodus	0.3	Gastropoda	1.6	0.247	65	1.21457
1	31	14_x1.25_67mm_7.tif	Symphodus	0.333	Gastropoda	1.25	0.153	67	2.17647
2	31	14_x1.25_67mm_7.tif	Symphodus	0.176	Gastropoda	1.25	0.153	67	1.15033
3	31	14_x1.25_67mm_7.tif	Symphodus	0.177	Gastropoda	1.25	0.153	67	1.15686
5	31	14_x1.25_67mm_7.tif	Symphodus	0.208	Gastropoda	1.25	0.153	67	1.35948
6	31	14_x1.25_67mm_7.tif	Symphodus	0.172	Gastropoda	1.25	0.153	67	1.12418
8	31	14_x1.25_67mm_7.tif	Symphodus	0.187	Gastropoda	1.25	0.153	67	1.22222
9	31	14_x1.25_67mm_7.tif	Symphodus	0.283	Gastropoda	1.25	0.153	67	1.84967
10	31	14_x1.25_67mm_7.tif	Symphodus	0.4	Gastropoda	1.25	0.153	67	2.61438
24	34	19_x1.25_62mm_10.tif	Symphodus	0.238	Gastropoda	1.25	0.153	62	1.55556
37	34	20_x1.25_62mm_10.tif	Symphodus	0.122	Gastropoda	1.25	0.153	62	0.797386
38	34	20_x1.25_62mm_10.tif	Symphodus	0.129	Gastropoda	1.25	0.153	62	0.843137
41	34	20_x1.25_62mm_10.tif	Symphodus	0.173	Gastropoda	1.25	0.153	62	1.13072
42	34	20_x1.25_62mm_10.tif	Symphodus	0.14	Gastropoda	1.25	0.153	62	0.915033
9	36	1_x2.0_41mm_1.tif	Symphodus	0.09	Gastropoda	2	0.31	41	0.290323
10	36	1_x2.0_41mm_1.tif	Symphodus	0.121	Gastropoda	2	0.31	41	0.390323
11	36	1_x2.0_41mm_1.tif	Symphodus	0.104	Gastropoda	2	0.31	41	0.335484
1	36	2_x1.6_41mm_2.tif	Symphodus	0.19	Gastropoda	1.6	0.247	41	0.769231
2	37	3_x2.0_50mm_3.tif	Symphodus	0.146	Gastropoda	2	0.31	50	0.470968
3	37	3_x2.0_50mm_3.tif	Symphodus	0.258	Gastropoda	2	0.31	50	0.832258
3	38	4_x1.6_57mm_4.tif	Symphodus	0.124	Gastropoda	1.6	0.247	57	0.502024
4	38	4_x1.6_57mm_4.tif	Symphodus	0.103	Gastropoda	1.6	0.247	57	0.417004
5	38	4_x1.6_57mm_4.tif	Symphodus	0.269	Gastropoda	1.6	0.247	57	1.08907
6	38	4_x1.6_57mm_4.tif	Symphodus	0.254	Gastropoda	1.6	0.247	57	1.02834
5	39	5_x1.6_47mm_5.tif	Symphodus	0.339	Gastropoda	1.6	0.247	47	1.37247
6	39	5_x1.6_47mm_5.tif	Symphodus	0.294	Gastropoda	1.6	0.247	47	1.19028
7	39	5_x1.6_47mm_5.tif	Symphodus	0.161	Gastropoda	1.6	0.247	47	0.651822
8	39	5_x1.6_47mm_5.tif	Symphodus	0.226	Gastropoda	1.6	0.247	47	0.91498
9	39	5_x1.6_47mm_5.tif	Symphodus	0.38	Gastropoda	1.6	0.247	47	1.53846
10	39	5_x1.6_47mm_5.tif	Symphodus	0.266	Gastropoda	1.6	0.247	47	1.07692
13	39	5_x1.6_47mm_5.tif	Symphodus	0.092	Gastropoda	1.6	0.247	47	0.37247
1	40	6_x1.6_43mm_6.tif	Symphodus	0.416	Gastropoda	1.6	0.247	43	1.68421
2	40	6_x1.6_43mm_6.tif	Symphodus	0.185	Gastropoda	1.6	0.247	43	0.748988
3	40	6_x1.6_43mm_6.tif	Symphodus	0.12	Gastropoda	1.6	0.247	43	0.48583
4	40	6_x1.6_43mm_6.tif	Symphodus	0.251	Gastropoda	1.6	0.247	43	1.01619
5	40	6_x1.6_43mm_6.tif	Symphodus	0.123	Gastropoda	1.6	0.247	43	0.497976
6	40	6_x1.6_43mm_6.tif	Symphodus	0.21	Gastropoda	1.6	0.247	43	0.850202
7	40	6_x1.6_43mm_6.tif	Symphodus	0.247	Gastropoda	1.6	0.247	43	1
8	40	6_x1.6_43mm_6.tif	Symphodus	0.152	Gastropoda	1.6	0.247	43	0.615385
9	40	6_x1.6_43mm_6.tif	Symphodus	0.124	Gastropoda	1.6	0.247	43	0.502024
10	40	6_x1.6_43mm_6.tif	Symphodus	0.165	Gastropoda	1.6	0.247	43	0.668016
11	40	6_x1.6_43mm_6.tif	Symphodus	0.175	Gastropoda	1.6	0.247	43	0.708502
1	41	7_x1.25_59mm_7.tif	Symphodus	0.207	Gastropoda	1.25	0.153	59	1.35294
2	41	7_x1.25_59mm_7.tif	Symphodus	0.137	Gastropoda	1.25	0.153	59	0.895425
3	41	7_x1.25_59mm_7.tif	Symphodus	0.274	Gastropoda	1.25	0.153	59	1.79085
4	41	7_x1.25_59mm_7.tif	Symphodus	0.13	Gastropoda	1.25	0.153	59	0.849673
5	41	7_x1.25_59mm_7.tif	Symphodus	0.175	Gastropoda	1.25	0.153	59	1.14379
6	41	7_x1.25_59mm_7.tif	Symphodus	0.267	Gastropoda	1.25	0.153	59	1.7451
1	44	10_x2.0_58mm_10.tif	Symphodus	0.367	Gastropoda	2	0.31	58	1.18387
1	45	11_x2.0_60mm_11.tif	Symphodus	0.439	Gastropoda	2	0.31	60	1.41613
9	46	12_x2.5_47mm_12.tif	Symphodus	0.258	Gastropoda	2.5	0.39	47	0.661538
10	46	12_x2.5_47mm_12.tif	Symphodus	0.217	Gastropoda	2.5	0.39	47	0.55641
11	46	12_x2.5_47mm_12.tif	Symphodus	0.151	Gastropoda	2.5	0.39	47	0.387179
1	1	13_x5_39_1.tif	Symphodus	0.676	Harpacticoida	5	0.78	39	0.866667
1	1	14_x5_39_1.tif	Symphodus	1.757	Harpacticoida	5	0.78	39	2.25256
1	2	15_x5_34_2tif.tif	Symphodus	0.55	Harpacticoida	5	0.78	34	0.705128
2	2	15_x5_34_2tif.tif	Symphodus	0.432	Harpacticoida	5	0.78	34	0.553846
3	2	15_x5_34_2tif.tif	Symphodus	0.404	Harpacticoida	5	0.78	34	0.517949
4	2	15_x5_34_2tif.tif	Symphodus	0.279	Harpacticoida	5	0.78	34	0.357692
5	2	15_x5_34_2tif.tif	Symphodus	0.308	Harpacticoida	5	0.78	34	0.394872
1	2	16_x8_34_2tif.tif	Symphodus	0.559	Harpacticoida	8	1.247	34	0.448276
2	2	16_x8_34_2tif.tif	Symphodus	0.539	Harpacticoida	8	1.247	34	0.432237
3	2	16_x8_34_2tif.tif	Symphodus	0.357	Harpacticoida	8	1.247	34	0.286287
1	2	17_x5_34_2tif.tif	Symphodus	0.407	Harpacticoida	5	0.78	34	0.521795
2	2	17_x5_34_2tif.tif	Symphodus	0.455	Harpacticoida	5	0.78	34	0.583333
3	2	17_x5_34_2tif.tif	Symphodus	0.337	Harpacticoida	5	0.78	34	0.432051
1	4	19_x4_41_4.tif	Symphodus	0.417	Harpacticoida	4	0.617	41	0.675851
3	4	19_x4_41_4.tif	Symphodus	0.436	Harpacticoida	4	0.617	41	0.706645
4	4	19_x4_41_4.tif	Symphodus	0.42	Harpacticoida	4	0.617	41	0.680713
5	4	19_x4_41_4.tif	Symphodus	0.187	Harpacticoida	4	0.617	41	0.303079
1	4	20_x6.3_41_4.tif	Symphodus	0.295	Harpacticoida	6.3	0.98	41	0.30102
1	4	22_x3.2_41_4.tif	Symphodus	0.461	Harpacticoida	3.2	0.494	41	0.933198
2	4	22_x3.2_41_4.tif	Symphodus	0.253	Harpacticoida	3.2	0.494	41	0.512146
3	4	22_x3.2_41_4.tif	Symphodus	0.28	Harpacticoida	3.2	0.494	41	0.566802
4	4	22_x3.2_41_4.tif	Symphodus	0.397	Harpacticoida	3.2	0.494	41	0.803644
5	4	22_x3.2_41_4.tif	Symphodus	0.288	Harpacticoida	3.2	0.494	41	0.582996
1	9	23_x4_34_9.tif	Symphodus	0.392	Harpacticoida	4	0.617	34	0.635332
2	9	23_x4_34_9.tif	Symphodus	0.531	Harpacticoida	4	0.617	34	0.860616
3	9	23_x4_34_9.tif	Symphodus	0.324	Harpacticoida	4	0.617	34	0.525122
1	5	23.b_x6.3_36_5.tif	Symphodus	0.353	Harpacticoida	6.3	0.98	36	0.360204
2	5	23.b_x6.3_36_5.tif	Symphodus	0.509	Harpacticoida	6.3	0.98	36	0.519388
1	5	24_x2.5_36_.5tif.tif	Symphodus	0.293	Harpacticoida	2.5	0.39	36	0.751282
2	5	24_x2.5_36_.5tif.tif	Symphodus	0.119	Harpacticoida	2.5	0.39	36	0.305128
3	5	24_x2.5_36_.5tif.tif	Symphodus	0.248	Harpacticoida	2.5	0.39	36	0.635897
4	5	24_x2.5_36_.5tif.tif	Symphodus	0.206	Harpacticoida	2.5	0.39	36	0.528205
5	5	24_x2.5_36_.5tif.tif	Symphodus	0.246	Harpacticoida	2.5	0.39	36	0.630769
6	5	24_x2.5_36_.5tif.tif	Symphodus	0.134	Harpacticoida	2.5	0.39	36	0.34359
7	5	24_x2.5_36_.5tif.tif	Symphodus	0.11	Harpacticoida	2.5	0.39	36	0.282051
8	5	24_x2.5_36_.5tif.tif	Symphodus	0.121	Harpacticoida	2.5	0.39	36	0.310256
9	5	24_x2.5_36_.5tif.tif	Symphodus	0.181	Harpacticoida	2.5	0.39	36	0.464103
10	5	24_x2.5_36_.5tif.tif	Symphodus	0.125	Harpacticoida	2.5	0.39	36	0.320513
11	5	24_x2.5_36_.5tif.tif	Symphodus	0.209	Harpacticoida	2.5	0.39	36	0.535897
12	5	24_x2.5_36_.5tif.tif	Symphodus	0.155	Harpacticoida	2.5	0.39	36	0.397436
13	5	24_x2.5_36_.5tif.tif	Symphodus	0.301	Harpacticoida	2.5	0.39	36	0.771795
14	5	24_x2.5_36_.5tif.tif	Symphodus	0.158	Harpacticoida	2.5	0.39	36	0.405128
15	5	24_x2.5_36_.5tif.tif	Symphodus	0.235	Harpacticoida	2.5	0.39	36	0.602564
16	5	24_x2.5_36_.5tif.tif	Symphodus	0.292	Harpacticoida	2.5	0.39	36	0.748718
17	5	24_x2.5_36_.5tif.tif	Symphodus	0.219	Harpacticoida	2.5	0.39	36	0.561538
18	5	24_x2.5_36_.5tif.tif	Symphodus	0.225	Harpacticoida	2.5	0.39	36	0.576923
19	5	24_x2.5_36_.5tif.tif	Symphodus	0.251	Harpacticoida	2.5	0.39	36	0.64359
20	5	24_x2.5_36_.5tif.tif	Symphodus	0.116	Harpacticoida	2.5	0.39	36	0.297436
21	5	24_x2.5_36_.5tif.tif	Symphodus	0.278	Harpacticoida	2.5	0.39	36	0.712821
22	5	24_x2.5_36_.5tif.tif	Symphodus	0.086	Harpacticoida	2.5	0.39	36	0.220513
23	5	24_x2.5_36_.5tif.tif	Symphodus	0.212	Harpacticoida	2.5	0.39	36	0.54359
24	5	24_x2.5_36_.5tif.tif	Symphodus	0.154	Harpacticoida	2.5	0.39	36	0.394872
25	5	24_x2.5_36_.5tif.tif	Symphodus	0.22	Harpacticoida	2.5	0.39	36	0.564103
26	5	24_x2.5_36_.5tif.tif	Symphodus	0.204	Harpacticoida	2.5	0.39	36	0.523077
27	5	24_x2.5_36_.5tif.tif	Symphodus	0.235	Harpacticoida	2.5	0.39	36	0.602564
28	5	24_x2.5_36_.5tif.tif	Symphodus	0.283	Harpacticoida	2.5	0.39	36	0.725641
29	5	24_x2.5_36_.5tif.tif	Symphodus	0.263	Harpacticoida	2.5	0.39	36	0.674359
30	5	24_x2.5_36_.5tif.tif	Symphodus	0.203	Harpacticoida	2.5	0.39	36	0.520513
31	5	24_x2.5_36_.5tif.tif	Symphodus	0.175	Harpacticoida	2.5	0.39	36	0.448718
32	5	24_x2.5_36_.5tif.tif	Symphodus	0.112	Harpacticoida	2.5	0.39	36	0.287179
33	5	24_x2.5_36_.5tif.tif	Symphodus	0.188	Harpacticoida	2.5	0.39	36	0.482051
34	5	24_x2.5_36_.5tif.tif	Symphodus	0.202	Harpacticoida	2.5	0.39	36	0.517949
35	5	24_x2.5_36_.5tif.tif	Symphodus	0.09	Harpacticoida	2.5	0.39	36	0.230769
1	5	25_x2_36_5.tif	Symphodus	0.175	Harpacticoida	2	0.31	36	0.564516
2	5	25_x2_36_5.tif	Symphodus	0.139	Harpacticoida	2	0.31	36	0.448387
3	5	25_x2_36_5.tif	Symphodus	0.174	Harpacticoida	2	0.31	36	0.56129
4	5	25_x2_36_5.tif	Symphodus	0.176	Harpacticoida	2	0.31	36	0.567742
5	5	25_x2_36_5.tif	Symphodus	0.119	Harpacticoida	2	0.31	36	0.383871
6	5	25_x2_36_5.tif	Symphodus	0.206	Harpacticoida	2	0.31	36	0.664516
7	5	25_x2_36_5.tif	Symphodus	0.189	Harpacticoida	2	0.31	36	0.609677
8	5	25_x2_36_5.tif	Symphodus	0.098	Harpacticoida	2	0.31	36	0.316129
9	5	25_x2_36_5.tif	Symphodus	0.186	Harpacticoida	2	0.31	36	0.6
10	5	25_x2_36_5.tif	Symphodus	0.15	Harpacticoida	2	0.31	36	0.483871
11	5	25_x2_36_5.tif	Symphodus	0.209	Harpacticoida	2	0.31	36	0.674194
12	5	25_x2_36_5.tif	Symphodus	0.166	Harpacticoida	2	0.31	36	0.535484
13	5	25_x2_36_5.tif	Symphodus	0.131	Harpacticoida	2	0.31	36	0.422581
14	5	25_x2_36_5.tif	Symphodus	0.117	Harpacticoida	2	0.31	36	0.377419
15	5	25_x2_36_5.tif	Symphodus	0.16	Harpacticoida	2	0.31	36	0.516129
16	5	25_x2_36_5.tif	Symphodus	0.139	Harpacticoida	2	0.31	36	0.448387
17	5	25_x2_36_5.tif	Symphodus	0.11	Harpacticoida	2	0.31	36	0.354839
18	5	25_x2_36_5.tif	Symphodus	0.094	Harpacticoida	2	0.31	36	0.303226
19	5	25_x2_36_5.tif	Symphodus	0.173	Harpacticoida	2	0.31	36	0.558065
20	5	25_x2_36_5.tif	Symphodus	0.242	Harpacticoida	2	0.31	36	0.780645
21	5	25_x2_36_5.tif	Symphodus	0.21	Harpacticoida	2	0.31	36	0.677419
22	5	25_x2_36_5.tif	Symphodus	0.164	Harpacticoida	2	0.31	36	0.529032
23	5	25_x2_36_5.tif	Symphodus	0.155	Harpacticoida	2	0.31	36	0.5
24	5	25_x2_36_5.tif	Symphodus	0.211	Harpacticoida	2	0.31	36	0.680645
25	5	25_x2_36_5.tif	Symphodus	0.172	Harpacticoida	2	0.31	36	0.554839
26	5	25_x2_36_5.tif	Symphodus	0.203	Harpacticoida	2	0.31	36	0.654839
27	5	25_x2_36_5.tif	Symphodus	0.23	Harpacticoida	2	0.31	36	0.741935
28	5	25_x2_36_5.tif	Symphodus	0.397	Harpacticoida	2	0.31	36	1.28065
29	5	25_x2_36_5.tif	Symphodus	0.279	Harpacticoida	2	0.31	36	0.9
30	5	25_x2_36_5.tif	Symphodus	0.166	Harpacticoida	2	0.31	36	0.535484
31	5	25_x2_36_5.tif	Symphodus	0.18	Harpacticoida	2	0.31	36	0.580645
32	5	25_x2_36_5.tif	Symphodus	0.168	Harpacticoida	2	0.31	36	0.541935
33	5	25_x2_36_5.tif	Symphodus	0.274	Harpacticoida	2	0.31	36	0.883871
34	5	25_x2_36_5.tif	Symphodus	0.165	Harpacticoida	2	0.31	36	0.532258
38	5	25_x2_36_5.tif	Symphodus	0.154	Harpacticoida	2	0.31	36	0.496774
39	5	25_x2_36_5.tif	Symphodus	0.169	Harpacticoida	2	0.31	36	0.545161
40	5	25_x2_36_5.tif	Symphodus	0.113	Harpacticoida	2	0.31	36	0.364516
41	5	25_x2_36_5.tif	Symphodus	0.092	Harpacticoida	2	0.31	36	0.296774
1	5	26_x2_36_5.tif	Symphodus	0.264	Harpacticoida	2	0.31	36	0.851613
2	5	26_x2_36_5.tif	Symphodus	0.141	Harpacticoida	2	0.31	36	0.454839
3	5	26_x2_36_5.tif	Symphodus	0.161	Harpacticoida	2	0.31	36	0.519355
4	5	26_x2_36_5.tif	Symphodus	0.145	Harpacticoida	2	0.31	36	0.467742
5	5	26_x2_36_5.tif	Symphodus	0.179	Harpacticoida	2	0.31	36	0.577419
6	5	26_x2_36_5.tif	Symphodus	0.114	Harpacticoida	2	0.31	36	0.367742
7	5	26_x2_36_5.tif	Symphodus	0.157	Harpacticoida	2	0.31	36	0.506452
8	5	26_x2_36_5.tif	Symphodus	0.21	Harpacticoida	2	0.31	36	0.677419
9	5	26_x2_36_5.tif	Symphodus	0.211	Harpacticoida	2	0.31	36	0.680645
10	5	26_x2_36_5.tif	Symphodus	0.184	Harpacticoida	2	0.31	36	0.593548
11	5	26_x2_36_5.tif	Symphodus	0.217	Harpacticoida	2	0.31	36	0.7
12	5	26_x2_36_5.tif	Symphodus	0.279	Harpacticoida	2	0.31	36	0.9
13	5	26_x2_36_5.tif	Symphodus	0.139	Harpacticoida	2	0.31	36	0.448387
14	5	26_x2_36_5.tif	Symphodus	0.148	Harpacticoida	2	0.31	36	0.477419
15	5	26_x2_36_5.tif	Symphodus	0.188	Harpacticoida	2	0.31	36	0.606452
16	5	26_x2_36_5.tif	Symphodus	0.208	Harpacticoida	2	0.31	36	0.670968
17	5	26_x2_36_5.tif	Symphodus	0.194	Harpacticoida	2	0.31	36	0.625806
18	5	26_x2_36_5.tif	Symphodus	0.151	Harpacticoida	2	0.31	36	0.487097
19	5	26_x2_36_5.tif	Symphodus	0.162	Harpacticoida	2	0.31	36	0.522581
20	5	26_x2_36_5.tif	Symphodus	0.196	Harpacticoida	2	0.31	36	0.632258
21	5	26_x2_36_5.tif	Symphodus	0.198	Harpacticoida	2	0.31	36	0.63871
22	5	26_x2_36_5.tif	Symphodus	0.146	Harpacticoida	2	0.31	36	0.470968
23	5	26_x2_36_5.tif	Symphodus	0.171	Harpacticoida	2	0.31	36	0.551613
24	5	26_x2_36_5.tif	Symphodus	0.105	Harpacticoida	2	0.31	36	0.33871
25	5	26_x2_36_5.tif	Symphodus	0.098	Harpacticoida	2	0.31	36	0.316129
26	5	26_x2_36_5.tif	Symphodus	0.083	Harpacticoida	2	0.31	36	0.267742
27	5	26_x2_36_5.tif	Symphodus	0.113	Harpacticoida	2	0.31	36	0.364516
1	6	27_x4_34_6.tif	Symphodus	0.483	Harpacticoida	4	0.617	34	0.78282
1	6	28.b_x5_34_6.tif	Symphodus	0.616	Harpacticoida	5	0.78	34	0.789744
1	6	28_x0.71_34_6.tif	Symphodus	0.167	Harpacticoida	2	0.31	34	0.53871
2	6	28_x0.71_34_6.tif	Symphodus	0.118	Harpacticoida	2	0.31	34	0.380645
3	6	28_x0.71_34_6.tif	Symphodus	0.105	Harpacticoida	2	0.31	34	0.33871
4	6	28_x0.71_34_6.tif	Symphodus	0.165	Harpacticoida	2	0.31	34	0.532258
5	6	28_x0.71_34_6.tif	Symphodus	0.228	Harpacticoida	2	0.31	34	0.735484
1	6	29_x3.2_34_6.tif	Symphodus	0.299	Harpacticoida	3.2	0.494	34	0.605263
2	6	29_x3.2_34_6.tif	Symphodus	0.211	Harpacticoida	3.2	0.494	34	0.427126
1	7	30_x10_38_7.tif	Symphodus	0.701	Harpacticoida	10	1.56	38	0.449359
1	7	32_x5_38_7.tif	Symphodus	0.393	Harpacticoida	5	0.78	38	0.503846
2	7	32_x5_38_7.tif	Symphodus	0.519	Harpacticoida	5	0.78	38	0.665385
3	7	32_x5_38_7.tif	Symphodus	0.544	Harpacticoida	5	0.78	38	0.697436
4	7	32_x5_38_7.tif	Symphodus	0.381	Harpacticoida	5	0.78	38	0.488462
1	7	33_x6.3_38_7.tif	Symphodus	0.627	Harpacticoida	6.3	0.98	38	0.639796
1	8	35_x1.6_33_8.tif	Symphodus	0.544	Harpacticoida	1.6	0.247	33	2.20243
1	8	36_x11.5_33_8.tif	Symphodus	0.665	Harpacticoida	11.5	1.837	33	0.362003
4	8	38_x5_33_8.tif	Symphodus	0.417	Harpacticoida	5	0.78	33	0.534615
1	8	39_x8_33_8.tif	Symphodus	0.524	Harpacticoida	8	1.247	33	0.420209
1	8	40_x8_33_8.tif	Symphodus	0.554	Harpacticoida	8	1.247	33	0.444266
1	8	41_x5_33_8.tif	Symphodus	0.519	Harpacticoida	5	0.78	33	0.665385
2	8	41_x5_33_8.tif	Symphodus	0.318	Harpacticoida	5	0.78	33	0.407692
3	8	41_x5_33_8.tif	Symphodus	0.32	Harpacticoida	5	0.78	33	0.410256
4	8	41_x5_33_8.tif	Symphodus	0.461	Harpacticoida	5	0.78	33	0.591026
5	8	41_x5_33_8.tif	Symphodus	0.381	Harpacticoida	5	0.78	33	0.488462
6	8	41_x5_33_8.tif	Symphodus	0.207	Harpacticoida	5	0.78	33	0.265385
7	8	41_x5_33_8.tif	Symphodus	0.32	Harpacticoida	5	0.78	33	0.410256
8	8	41_x5_33_8.tif	Symphodus	0.435	Harpacticoida	5	0.78	33	0.557692
1	9	42_x3.2_34_9.tif	Symphodus	0.341	Harpacticoida	3.2	0.494	34	0.690283
2	9	42_x3.2_34_9.tif	Symphodus	0.25	Harpacticoida	3.2	0.494	34	0.506073
3	9	42_x3.2_34_9.tif	Symphodus	0.301	Harpacticoida	3.2	0.494	34	0.609312
4	9	42_x3.2_34_9.tif	Symphodus	0.165	Harpacticoida	3.2	0.494	34	0.334008
5	9	42_x3.2_34_9.tif	Symphodus	0.108	Harpacticoida	3.2	0.494	34	0.218623
6	9	42_x3.2_34_9.tif	Symphodus	0.154	Harpacticoida	3.2	0.494	34	0.311741
1	9	43_x4_34_9.tif	Symphodus	0.595	Harpacticoida	4	0.617	34	0.964344
2	9	43_x4_34_9.tif	Symphodus	0.257	Harpacticoida	4	0.617	34	0.416532
3	9	43_x4_34_9.tif	Symphodus	0.256	Harpacticoida	4	0.617	34	0.414911
4	9	43_x4_34_9.tif	Symphodus	0.179	Harpacticoida	4	0.617	34	0.290113
1	9	44_x4_34_9.tif	Symphodus	0.308	Harpacticoida	4	0.617	34	0.49919
1	9	45_x4_34_9.tif	Symphodus	0.284	Harpacticoida	4	0.617	34	0.460292
2	9	45_x4_34_9.tif	Symphodus	0.369	Harpacticoida	4	0.617	34	0.598055
1	9	46_x5_34_9.tif	Symphodus	0.329	Harpacticoida	5	0.78	34	0.421795
2	9	46_x5_34_9.tif	Symphodus	0.457	Harpacticoida	5	0.78	34	0.585897
7	10	47_x4_33_10.tif	Symphodus	0.537	Harpacticoida	4	0.617	33	0.87034
1	10	49_x3.2_33_10.tif	Symphodus	0.351	Harpacticoida	3.2	0.494	33	0.710526
2	10	49_x3.2_33_10.tif	Symphodus	0.322	Harpacticoida	3.2	0.494	33	0.651822
3	10	49_x3.2_33_10.tif	Symphodus	0.228	Harpacticoida	3.2	0.494	33	0.461538
4	10	49_x3.2_33_10.tif	Symphodus	0.233	Harpacticoida	3.2	0.494	33	0.47166
5	10	49_x3.2_33_10.tif	Symphodus	0.241	Harpacticoida	3.2	0.494	33	0.487854
6	10	49_x3.2_33_10.tif	Symphodus	0.214	Harpacticoida	3.2	0.494	33	0.433198
7	10	49_x3.2_33_10.tif	Symphodus	0.163	Harpacticoida	3.2	0.494	33	0.32996
8	10	49_x3.2_33_10.tif	Symphodus	0.215	Harpacticoida	3.2	0.494	33	0.435223
9	10	49_x3.2_33_10.tif	Symphodus	0.299	Harpacticoida	3.2	0.494	33	0.605263
10	10	49_x3.2_33_10.tif	Symphodus	0.264	Harpacticoida	3.2	0.494	33	0.534413
1	10	49_x3.2_33_10.tif	Symphodus	0.351	Harpacticoida	3.2	0.494	33	0.710526
2	10	49_x3.2_33_10.tif	Symphodus	0.322	Harpacticoida	3.2	0.494	33	0.651822
3	10	49_x3.2_33_10.tif	Symphodus	0.228	Harpacticoida	3.2	0.494	33	0.461538
4	10	49_x3.2_33_10.tif	Symphodus	0.233	Harpacticoida	3.2	0.494	33	0.47166
5	10	49_x3.2_33_10.tif	Symphodus	0.241	Harpacticoida	3.2	0.494	33	0.487854
6	10	49_x3.2_33_10.tif	Symphodus	0.214	Harpacticoida	3.2	0.494	33	0.433198
7	10	49_x3.2_33_10.tif	Symphodus	0.163	Harpacticoida	3.2	0.494	33	0.32996
8	10	49_x3.2_33_10.tif	Symphodus	0.215	Harpacticoida	3.2	0.494	33	0.435223
9	10	49_x3.2_33_10.tif	Symphodus	0.299	Harpacticoida	3.2	0.494	33	0.605263
10	10	49_x3.2_33_10.tif	Symphodus	0.264	Harpacticoida	3.2	0.494	33	0.534413
1	10	50_x4_33_10.tif	Symphodus	0.415	Harpacticoida	4	0.617	33	0.672609
2	10	50_x4_33_10.tif	Symphodus	0.263	Harpacticoida	4	0.617	33	0.426256
1	10	52_x3.2_33_10.tif	Symphodus	0.234	Harpacticoida	3.2	0.494	33	0.473684
2	10	52_x3.2_33_10.tif	Symphodus	0.218	Harpacticoida	3.2	0.494	33	0.441296
3	10	52_x3.2_33_10.tif	Symphodus	0.151	Harpacticoida	3.2	0.494	33	0.305668
4	10	52_x3.2_33_10.tif	Symphodus	0.214	Harpacticoida	3.2	0.494	33	0.433198
5	10	52_x3.2_33_10.tif	Symphodus	0.25	Harpacticoida	3.2	0.494	33	0.506073
6	10	52_x3.2_33_10.tif	Symphodus	0.237	Harpacticoida	3.2	0.494	33	0.479757
7	10	52_x3.2_33_10.tif	Symphodus	0.181	Harpacticoida	3.2	0.494	33	0.366397
1	11	54_x8_36_11.tif	Symphodus	0.528	Harpacticoida	8	1.247	36	0.423416
10	12	55_x4_38_12.tif	Symphodus	0.307	Harpacticoida	4	0.617	38	0.497569
1	12	56_x5_38_12.tif	Symphodus	0.426	Harpacticoida	5	0.78	38	0.546154
2	12	56_x5_38_12.tif	Symphodus	0.277	Harpacticoida	5	0.78	38	0.355128
3	12	56_x5_38_12.tif	Symphodus	0.571	Harpacticoida	5	0.78	38	0.732051
1	12	57.b_x6.3_38_12.tif	Symphodus	0.437	Harpacticoida	6.3	0.98	38	0.445918
2	12	57.b_x6.3_38_12.tif	Symphodus	0.439	Harpacticoida	6.3	0.98	38	0.447959
3	12	57.b_x6.3_38_12.tif	Symphodus	0.515	Harpacticoida	6.3	0.98	38	0.52551
6	12	57.b_x6.3_38_12.tif	Symphodus	0.434	Harpacticoida	6.3	0.98	38	0.442857
1	12	57_x1.25_38_12.tif	Symphodus	0.305	Harpacticoida	4	0.617	38	0.494327
1	12	58_x5_38_12.tif	Symphodus	0.292	Harpacticoida	5	0.78	38	0.374359
2	12	58_x5_38_12.tif	Symphodus	0.414	Harpacticoida	5	0.78	38	0.530769
3	12	58_x5_38_12.tif	Symphodus	0.388	Harpacticoida	5	0.78	38	0.497436
4	12	58_x5_38_12.tif	Symphodus	0.49	Harpacticoida	5	0.78	38	0.628205
5	12	58_x5_38_12.tif	Symphodus	0.445	Harpacticoida	5	0.78	38	0.570513
6	12	58_x5_38_12.tif	Symphodus	0.408	Harpacticoida	5	0.78	38	0.523077
7	12	58_x5_38_12.tif	Symphodus	0.417	Harpacticoida	5	0.78	38	0.534615
1	12	59_x6.3_38_12.tif	Symphodus	0.537	Harpacticoida	6.3	0.98	38	0.547959
2	12	59_x6.3_38_12.tif	Symphodus	0.496	Harpacticoida	6.3	0.98	38	0.506122
1	12	60_x3.2_38_12.tif	Symphodus	0.409	Harpacticoida	3.2	0.494	38	0.827935
1	12	61_x6.3_38_12.tif	Symphodus	0.728	Harpacticoida	6.3	0.98	38	0.742857
2	12	61_x6.3_38_12.tif	Symphodus	0.42	Harpacticoida	6.3	0.98	38	0.428571
1	12	62_x5_38_12.tif	Symphodus	0.374	Harpacticoida	5	0.78	38	0.479487
1	12	63_x5_38_12.tif	Symphodus	0.392	Harpacticoida	5	0.78	38	0.502564
2	12	63_x5_38_12.tif	Symphodus	0.376	Harpacticoida	5	0.78	38	0.482051
3	12	63_x5_38_12.tif	Symphodus	0.361	Harpacticoida	5	0.78	38	0.462821
4	12	63_x5_38_12.tif	Symphodus	0.294	Harpacticoida	5	0.78	38	0.376923
5	12	63_x5_38_12.tif	Symphodus	0.34	Harpacticoida	5	0.78	38	0.435897
6	12	63_x5_38_12.tif	Symphodus	0.173	Harpacticoida	5	0.78	38	0.221795
4	12	64_x8_38_12.tif	Symphodus	0.443	Harpacticoida	8	1.247	38	0.355253
5	12	64_x8_38_12.tif	Symphodus	0.494	Harpacticoida	8	1.247	38	0.396151
1	13	65_x5_26_13.tif	Symphodus	0.51	Harpacticoida	5	0.78	26	0.653846
2	13	65_x5_26_13.tif	Symphodus	0.265	Harpacticoida	5	0.78	26	0.339744
1	13	66_x4_26_13.tif	Symphodus	0.485	Harpacticoida	4	0.617	26	0.786062
2	13	66_x4_26_13.tif	Symphodus	0.451	Harpacticoida	4	0.617	26	0.730956
1	13	67_x8_26_13.tif	Symphodus	0.718	Harpacticoida	8	1.247	26	0.575782
2	13	67_x8_26_13.tif	Symphodus	0.215	Harpacticoida	8	1.247	26	0.172414
3	13	67_x8_26_13.tif	Symphodus	0.292	Harpacticoida	8	1.247	26	0.234162
1	13	68_x5_26_13.tif	Symphodus	0.638	Harpacticoida	5	0.78	26	0.817949
7	13	70_x6.3_26_13.tif	Symphodus	0.416	Harpacticoida	6.3	0.98	26	0.42449
8	13	70_x6.3_26_13.tif	Symphodus	0.353	Harpacticoida	6.3	0.98	26	0.360204
3	13	71_x5_26_13.tif	Symphodus	0.306	Harpacticoida	5	0.78	26	0.392308
4	13	71_x5_26_13.tif	Symphodus	0.346	Harpacticoida	5	0.78	26	0.44359
1	14	72_x11.5_29_14.tif	Symphodus	0.531	Harpacticoida	11.5	1.837	29	0.289058
2	14	72_x11.5_29_14.tif	Symphodus	0.517	Harpacticoida	11.5	1.837	29	0.281437
1	14	73_x6.3_26_14.tif	Symphodus	0.51	Harpacticoida	6.3	0.98	26	0.520408
1	15	74_5_28_15.tif	Symphodus	0.239	Harpacticoida	5	0.78	28	0.30641
2	15	74_5_28_15.tif	Symphodus	0.448	Harpacticoida	5	0.78	28	0.574359
1	15	76_x6.3_28_15.tif	Symphodus	0.386	Harpacticoida	6.3	0.98	28	0.393878
1	15	78_x11.5_28_15.tif	Symphodus	0.556	Harpacticoida	11.5	1.837	28	0.302667
1	15	79_x6.3_28_15.tif	Symphodus	0.673	Harpacticoida	6.3	0.98	28	0.686735
1	16	82_11.5_28_16.tif	Symphodus	0.776	Harpacticoida	11.5	1.837	28	0.422428
1	16	83_x6.3_28_16.tif	Symphodus	0.695	Harpacticoida	6.3	0.98	28	0.709184
1	16	85_x10_28_16.tif	Symphodus	1.072	Harpacticoida	10	1.56	28	0.687179
1	16	86_x11.5_28_16.tif	Symphodus	0.817	Harpacticoida	11.5	1.837	28	0.444747
1	16	91_x6.3_28_16.tif	Symphodus	0.435	Harpacticoida	6.3	0.98	28	0.443878
2	16	91_x6.3_28_16.tif	Symphodus	0.497	Harpacticoida	6.3	0.98	28	0.507143
1	16	92_x10_28_16.tif	Symphodus	0.842	Harpacticoida	10	1.56	28	0.539744
3	16	92_x10_28_16.tif	Symphodus	0.703	Harpacticoida	10	1.56	28	0.450641
1	16	95_x4_28_16.tif	Symphodus	0.442	Harpacticoida	4	0.617	28	0.71637
2	16	95_x4_28_16.tif	Symphodus	0.349	Harpacticoida	4	0.617	28	0.56564
1	16	96_x8_28_16.tif	Symphodus	0.142	Harpacticoida	8	1.247	28	0.113873
1	16	97_x6.3_28_16.tif	Symphodus	0.732	Harpacticoida	6.3	0.98	28	0.746939
3	16	99_x4_28_16.tif	Symphodus	0.343	Harpacticoida	4	0.617	28	0.555916
4	16	99_x4_28_16.tif	Symphodus	0.314	Harpacticoida	4	0.617	28	0.508914
5	16	99_x4_28_16.tif	Symphodus	0.468	Harpacticoida	4	0.617	28	0.758509
6	16	99_x4_28_16.tif	Symphodus	0.337	Harpacticoida	4	0.617	28	0.546191
7	16	99_x4_28_16.tif	Symphodus	0.528	Harpacticoida	4	0.617	28	0.855754
2	16	101_x4_28_16.tif	Symphodus	0.282	Harpacticoida	4	0.617	28	0.45705
3	16	101_x4_28_16.tif	Symphodus	0.077	Harpacticoida	4	0.617	28	0.124797
1	17	102_x8_32_17.tif	Symphodus	0.591	Harpacticoida	8	1.247	32	0.473937
2	17	102_x8_32_17.tif	Symphodus	0.606	Harpacticoida	8	1.247	32	0.485966
1	17	104_x6.3_32_17.tif	Symphodus	0.665	Harpacticoida	6.3	0.98	32	0.678571
3	17	104_x6.3_32_17.tif	Symphodus	0.318	Harpacticoida	6.3	0.98	32	0.32449
2	17	105_x6.3_32_17.tif	Symphodus	0.259	Harpacticoida	6.3	0.98	32	0.264286
3	17	105_x6.3_32_17.tif	Symphodus	0.604	Harpacticoida	6.3	0.98	32	0.616327
1	17	106_x6.3_32_17.tif	Symphodus	0.15	Harpacticoida	6.3	0.98	32	0.153061
1	17	108_x8_32_17.tif	Symphodus	0.962	Harpacticoida	8	1.247	32	0.771451
1	17	109_x5_32_17.tif	Symphodus	0.605	Harpacticoida	5	0.78	32	0.775641
2	17	109_x5_32_17.tif	Symphodus	0.266	Harpacticoida	5	0.78	32	0.341026
1	17	111_x8_32_17.tif	Symphodus	0.596	Harpacticoida	8	1.247	32	0.477947
2	17	114_x5_32_17.tif	Symphodus	0.291	Harpacticoida	5	0.78	32	0.373077
3	18	115_x8_31_18.tif	Symphodus	0.459	Harpacticoida	8	1.247	31	0.368083
1	18	117_x5_31_18.tif	Symphodus	0.38	Harpacticoida	5	0.78	31	0.487179
2	18	117_x5_31_18.tif	Symphodus	0.618	Harpacticoida	5	0.78	31	0.792308
3	18	117_x5_31_18.tif	Symphodus	0.401	Harpacticoida	5	0.78	31	0.514103
4	18	117_x5_31_18.tif	Symphodus	0.558	Harpacticoida	5	0.78	31	0.715385
1	18	119_x5_31_18.tif	Symphodus	0.497	Harpacticoida	5	0.78	31	0.637179
2	18	119_x5_31_18.tif	Symphodus	0.436	Harpacticoida	5	0.78	31	0.558974
2	18	121_x11.5_31_18.tif	Symphodus	0.633	Harpacticoida	11.5	1.837	31	0.344584
5	18	122_x6.3_31_18.tif	Symphodus	0.429	Harpacticoida	6.3	0.98	31	0.437755
4	18	123_x6.3_31_18.tif	Symphodus	0.345	Harpacticoida	6.3	0.98	31	0.352041
5	18	123_x6.3_31_18.tif	Symphodus	0.371	Harpacticoida	6.3	0.98	31	0.378571
1	18	124_x8_31_18.tif	Symphodus	0.62	Harpacticoida	8	1.247	31	0.497193
1	19	126_x11.5_32_19.tif	Symphodus	0.596	Harpacticoida	11.5	1.837	32	0.324442
1	19	127_x4_32_19.tif	Symphodus	0.411	Harpacticoida	4	0.617	32	0.666126
1	19	128_x5_32_19.tif	Symphodus	0.638	Harpacticoida	5	0.78	32	0.817949
2	19	128_x5_32_19.tif	Symphodus	0.4	Harpacticoida	5	0.78	32	0.512821
3	19	128_x5_32_19.tif	Symphodus	0.739	Harpacticoida	5	0.78	32	0.947436
1	19	130_x5_32_19.tif	Symphodus	0.401	Harpacticoida	5	0.78	32	0.514103
2	19	130_x5_32_19.tif	Symphodus	0.285	Harpacticoida	5	0.78	32	0.365385
1	19	131_x4_32_19.tif	Symphodus	0.316	Harpacticoida	4	0.617	32	0.512156
1	19	132_x8_32_19.tif	Symphodus	0.489	Harpacticoida	8	1.247	32	0.392141
1	19	133_x4_32_19.tif	Symphodus	0.391	Harpacticoida	4	0.617	32	0.633712
2	19	133_x4_32_19.tif	Symphodus	0.261	Harpacticoida	4	0.617	32	0.423015
3	19	133_x4_32_19.tif	Symphodus	0.407	Harpacticoida	4	0.617	32	0.659643
4	19	133_x4_32_19.tif	Symphodus	0.424	Harpacticoida	4	0.617	32	0.687196
5	19	133_x4_32_19.tif	Symphodus	0.191	Harpacticoida	4	0.617	32	0.309562
8	19	133_x4_32_19.tif	Symphodus	0.383	Harpacticoida	4	0.617	32	0.620746
1	19	135_x11.5_32_19.tif	Symphodus	0.513	Harpacticoida	11.5	1.837	32	0.27926
1	19	137_x3.2_32_19.tif	Symphodus	0.385	Harpacticoida	3.2	0.494	32	0.779352
1	19	138_x8_32_19.tif	Symphodus	0.841	Harpacticoida	8	1.247	32	0.674419
2	19	138_x8_32_19.tif	Symphodus	0.682	Harpacticoida	8	1.247	32	0.546913
1	19	140_x11.5_32_19.tif	Symphodus	0.453	Harpacticoida	11.5	1.837	32	0.246598
1	19	143_x5_32_19.tif	Symphodus	0.497	Harpacticoida	5	0.78	32	0.637179
1	19	144_x8_32_19.tif	Symphodus	0.757	Harpacticoida	8	1.247	32	0.607057
2	19	145_x8_32_19.tif	Symphodus	0.494	Harpacticoida	8	1.247	32	0.396151
1	20	148_x6.3_35_20.tif	Symphodus	0.893	Harpacticoida	6.3	0.98	35	0.911224
4	20	149_x5_35_20.tif	Symphodus	0.332	Harpacticoida	5	0.78	35	0.425641
1	20	151_x8_35_20.tif	Symphodus	0.66	Harpacticoida	8	1.247	35	0.52927
2	20	151_x8_35_20.tif	Symphodus	0.54	Harpacticoida	8	1.247	35	0.433039
3	20	152_x11.5_35_20.tif	Symphodus	0.87	Harpacticoida	11.5	1.837	35	0.473598
1	20	153_x6.3_35_20.tif	Symphodus	0.474	Harpacticoida	6.3	0.98	35	0.483673
1	21	157_x5_35_21.tif	Symphodus	0.757	Harpacticoida	5	0.78	36	0.970513
8	21	158_x5_36_21.tif	Symphodus	0.392	Harpacticoida	5	0.78	36	0.502564
9	21	158_x5_36_21.tif	Symphodus	0.521	Harpacticoida	5	0.78	36	0.667949
4	21	161_x5_36_21.tif	Symphodus	0.513	Harpacticoida	5	0.78	36	0.657692
5	21	161_x5_36_21.tif	Symphodus	0.514	Harpacticoida	5	0.78	36	0.658974
7	21	161_x5_36_21.tif	Symphodus	0.421	Harpacticoida	5	0.78	36	0.539744
5	21	163_x5_36_21.tif	Symphodus	0.363	Harpacticoida	5	0.78	36	0.465385
6	21	163_x5_36_21.tif	Symphodus	0.545	Harpacticoida	5	0.78	36	0.698718
7	21	163_x5_36_21.tif	Symphodus	0.393	Harpacticoida	5	0.78	36	0.503846
8	21	163_x5_36_21.tif	Symphodus	0.601	Harpacticoida	5	0.78	36	0.770513
1	22	165_x8_39_22.tif	Symphodus	0.396	Harpacticoida	8	1.247	39	0.317562
1	22	166_x8_39_22.tif	Symphodus	0.645	Harpacticoida	8	1.247	39	0.517241
2	22	166_x8_39_22.tif	Symphodus	0.591	Harpacticoida	8	1.247	39	0.473937
1	22	169_x4_39_22.tif	Symphodus	0.401	Harpacticoida	4	0.617	39	0.649919
2	22	169_x4_39_22.tif	Symphodus	0.343	Harpacticoida	4	0.617	39	0.555916
1	22	170_x6.3_39_22.tif	Symphodus	0.526	Harpacticoida	6.3	0.98	39	0.536735
2	22	170_x6.3_39_22.tif	Symphodus	0.599	Harpacticoida	6.3	0.98	39	0.611224
3	22	170_x6.3_39_22.tif	Symphodus	0.26	Harpacticoida	6.3	0.98	39	0.265306
1	22	171_x4_39_22.tif	Symphodus	0.324	Harpacticoida	4	0.617	39	0.525122
2	22	171_x4_39_22.tif	Symphodus	0.406	Harpacticoida	4	0.617	39	0.658023
3	22	171_x4_39_22.tif	Symphodus	0.585	Harpacticoida	4	0.617	39	0.948136
4	22	171_x4_39_22.tif	Symphodus	0.387	Harpacticoida	4	0.617	39	0.627229
5	22	171_x4_39_22.tif	Symphodus	0.402	Harpacticoida	4	0.617	39	0.65154
2	4	19_x4_41_4.tif	Symphodus	0.21	Harpacticoida	4	0.617	41	0.340357
1	10	48_x4_33_10.tif	Symphodus	0.266	Harpacticoida	4	0.617	33	0.431118
1	10	51_x3.2_33_10.tif	Symphodus	0.268	Harpacticoida	3.2	0.494	33	0.54251
2	10	51_x3.2_33_10.tif	Symphodus	0.209	Harpacticoida	3.2	0.494	33	0.423077
23	10	52_x3.2_33_10.tif	Symphodus	0.21	Harpacticoida	3.2	0.494	33	0.425101
24	10	52_x3.2_33_10.tif	Symphodus	0.209	Harpacticoida	3.2	0.494	33	0.423077
25	10	52_x3.2_33_10.tif	Symphodus	0.143	Harpacticoida	3.2	0.494	33	0.289474
26	10	52_x3.2_33_10.tif	Symphodus	0.173	Harpacticoida	3.2	0.494	33	0.350202
6	19	133_x4_32_19.tif	Symphodus	0.244	Harpacticoida	4	0.617	32	0.395462
1	20	155_x11.5_35_20.tif	Symphodus	0.561	Harpacticoida	11.5	1.837	35	0.305389
2	21	162_x8_36_21.tif	Symphodus	0.781	Harpacticoida	8	1.247	36	0.626303
1	22	168_x6.3_39_22.tif	Symphodus	0.495	Harpacticoida	6.3	0.98	39	0.505102
6	22	171_x4_39_22.tif	Symphodus	0.243	Harpacticoida	4	0.617	39	0.393841
10	12	58_x5_38_12.tif	Symphodus	0.367	Harpacticoida	5	0.78	38	0.470513
3	23	1_x2.5_29mm_1.tif	Symphodus	0.158	Harpacticoida	2.5	0.39	29	0.405128
4	23	1_x2.5_29mm_1.tif	Symphodus	0.239	Harpacticoida	2.5	0.39	29	0.612821
5	23	1_x2.5_29mm_1.tif	Symphodus	0.193	Harpacticoida	2.5	0.39	29	0.494872
6	23	1_x2.5_29mm_1.tif	Symphodus	0.207	Harpacticoida	2.5	0.39	29	0.530769
7	23	1_x2.5_29mm_1.tif	Symphodus	0.221	Harpacticoida	2.5	0.39	29	0.566667
1	23	3_x4.0_29mm_1.tif	Symphodus	0.317	Harpacticoida	4	0.617	29	0.513776
2	23	6_x3.2_29mm_1.tif	Symphodus	0.301	Harpacticoida	3.2	0.494	29	0.609312
3	23	6_x3.2_29mm_1.tif	Symphodus	0.208	Harpacticoida	3.2	0.494	29	0.421053
1	23	7_x4.0_29mm_1.tif	Symphodus	0.376	Harpacticoida	4	0.617	29	0.6094
2	23	7_x4.0_29mm_1.tif	Symphodus	0.342	Harpacticoida	4	0.617	29	0.554295
2	25	1_x2.0_55mm_1.tif	Symphodus	0.15	Harpacticoida	2	0.31	55	0.483871
3	25	1_x2.0_55mm_1.tif	Symphodus	0.166	Harpacticoida	2	0.31	55	0.535484
1	25	1_x2.0_55mm_1.tif	Symphodus	0.212	Harpacticoida	2	0.31	55	0.683871
1	25	9_x2.5_28mm_3.tif	Symphodus	0.183	Harpacticoida	2.5	0.39	28	0.469231
2	25	9_x2.5_28mm_3.tif	Symphodus	0.252	Harpacticoida	2.5	0.39	28	0.646154
3	25	9_x2.5_28mm_3.tif	Symphodus	0.195	Harpacticoida	2.5	0.39	28	0.5
1	26	13_x3.2_31mm_4.tif	Symphodus	0.247	Harpacticoida	3.2	0.494	31	0.5
2	26	13_x3.2_31mm_4.tif	Symphodus	0.165	Harpacticoida	3.2	0.494	31	0.334008
8	26	2_x1.6_58mm_2.tif	Symphodus	0.304	Harpacticoida	1.6	0.247	58	1.23077
5	26	3_x1.6_58mm_2.tif	Symphodus	0.16	Harpacticoida	1.6	0.247	58	0.647773
6	26	3_x1.6_58mm_2.tif	Symphodus	0.211	Harpacticoida	1.6	0.247	58	0.854251
7	26	3_x1.6_58mm_2.tif	Symphodus	0.184	Harpacticoida	1.6	0.247	58	0.744939
8	26	3_x1.6_58mm_2.tif	Symphodus	0.14	Harpacticoida	1.6	0.247	58	0.566802
1	27	5_x1.6_46mm_3.tif	Symphodus	0.118	Harpacticoida	1.6	0.247	46	0.477733
2	27	5_x1.6_46mm_3.tif	Symphodus	0.17	Harpacticoida	1.6	0.247	46	0.688259
3	27	5_x1.6_46mm_3.tif	Symphodus	0.128	Harpacticoida	1.6	0.247	46	0.518219
4	27	5_x1.6_46mm_3.tif	Symphodus	0.181	Harpacticoida	1.6	0.247	46	0.732794
5	27	5_x1.6_46mm_3.tif	Symphodus	0.166	Harpacticoida	1.6	0.247	46	0.672065
6	27	5_x1.6_46mm_3.tif	Symphodus	0.188	Harpacticoida	1.6	0.247	46	0.761134
7	27	5_x1.6_46mm_3.tif	Symphodus	0.166	Harpacticoida	1.6	0.247	46	0.672065
8	27	5_x1.6_46mm_3.tif	Symphodus	0.16	Harpacticoida	1.6	0.247	46	0.647773
9	27	5_x1.6_46mm_3.tif	Symphodus	0.202	Harpacticoida	1.6	0.247	46	0.817814
10	27	5_x1.6_46mm_3.tif	Symphodus	0.161	Harpacticoida	1.6	0.247	46	0.651822
11	27	5_x1.6_46mm_3.tif	Symphodus	0.279	Harpacticoida	1.6	0.247	46	1.12955
12	27	5_x1.6_46mm_3.tif	Symphodus	0.176	Harpacticoida	1.6	0.247	46	0.712551
13	27	5_x1.6_46mm_3.tif	Symphodus	0.17	Harpacticoida	1.6	0.247	46	0.688259
14	27	5_x1.6_46mm_3.tif	Symphodus	0.173	Harpacticoida	1.6	0.247	46	0.700405
15	27	5_x1.6_46mm_3.tif	Symphodus	0.163	Harpacticoida	1.6	0.247	46	0.659919
16	27	5_x1.6_46mm_3.tif	Symphodus	0.183	Harpacticoida	1.6	0.247	46	0.740891
17	27	5_x1.6_46mm_3.tif	Symphodus	0.229	Harpacticoida	1.6	0.247	46	0.927126
18	27	5_x1.6_46mm_3.tif	Symphodus	0.179	Harpacticoida	1.6	0.247	46	0.724696
19	27	5_x1.6_46mm_3.tif	Symphodus	0.167	Harpacticoida	1.6	0.247	46	0.676113
20	27	5_x1.6_46mm_3.tif	Symphodus	0.164	Harpacticoida	1.6	0.247	46	0.663968
21	27	5_x1.6_46mm_3.tif	Symphodus	0.189	Harpacticoida	1.6	0.247	46	0.765182
22	27	5_x1.6_46mm_3.tif	Symphodus	0.142	Harpacticoida	1.6	0.247	46	0.574899
23	27	5_x1.6_46mm_3.tif	Symphodus	0.207	Harpacticoida	1.6	0.247	46	0.838057
24	27	5_x1.6_46mm_3.tif	Symphodus	0.199	Harpacticoida	1.6	0.247	46	0.805668
25	27	5_x1.6_46mm_3.tif	Symphodus	0.15	Harpacticoida	1.6	0.247	46	0.607287
26	27	5_x1.6_46mm_3.tif	Symphodus	0.209	Harpacticoida	1.6	0.247	46	0.846154
27	27	5_x1.6_46mm_3.tif	Symphodus	0.168	Harpacticoida	1.6	0.247	46	0.680162
28	27	5_x1.6_46mm_3.tif	Symphodus	0.205	Harpacticoida	1.6	0.247	46	0.82996
29	27	5_x1.6_46mm_3.tif	Symphodus	0.179	Harpacticoida	1.6	0.247	46	0.724696
30	27	5_x1.6_46mm_3.tif	Symphodus	0.18	Harpacticoida	1.6	0.247	46	0.728745
31	27	5_x1.6_46mm_3.tif	Symphodus	0.206	Harpacticoida	1.6	0.247	46	0.834008
32	27	5_x1.6_46mm_3.tif	Symphodus	0.281	Harpacticoida	1.6	0.247	46	1.13765
33	27	5_x1.6_46mm_3.tif	Symphodus	0.181	Harpacticoida	1.6	0.247	46	0.732794
1	27	6_x1.6_46mm_3.tif	Symphodus	0.171	Harpacticoida	1.6	0.247	46	0.692308
2	27	6_x1.6_46mm_3.tif	Symphodus	0.202	Harpacticoida	1.6	0.247	46	0.817814
3	27	6_x1.6_46mm_3.tif	Symphodus	0.197	Harpacticoida	1.6	0.247	46	0.797571
4	27	6_x1.6_46mm_3.tif	Symphodus	0.191	Harpacticoida	1.6	0.247	46	0.773279
5	27	6_x1.6_46mm_3.tif	Symphodus	0.167	Harpacticoida	1.6	0.247	46	0.676113
6	27	6_x1.6_46mm_3.tif	Symphodus	0.178	Harpacticoida	1.6	0.247	46	0.720648
7	27	6_x1.6_46mm_3.tif	Symphodus	0.172	Harpacticoida	1.6	0.247	46	0.696356
8	27	6_x1.6_46mm_3.tif	Symphodus	0.164	Harpacticoida	1.6	0.247	46	0.663968
9	27	6_x1.6_46mm_3.tif	Symphodus	0.122	Harpacticoida	1.6	0.247	46	0.493927
10	27	6_x1.6_46mm_3.tif	Symphodus	0.187	Harpacticoida	1.6	0.247	46	0.757085
11	27	6_x1.6_46mm_3.tif	Symphodus	0.18	Harpacticoida	1.6	0.247	46	0.728745
12	27	6_x1.6_46mm_3.tif	Symphodus	0.192	Harpacticoida	1.6	0.247	46	0.777328
13	27	6_x1.6_46mm_3.tif	Symphodus	0.163	Harpacticoida	1.6	0.247	46	0.659919
14	27	6_x1.6_46mm_3.tif	Symphodus	0.171	Harpacticoida	1.6	0.247	46	0.692308
15	27	6_x1.6_46mm_3.tif	Symphodus	0.173	Harpacticoida	1.6	0.247	46	0.700405
16	27	6_x1.6_46mm_3.tif	Symphodus	0.166	Harpacticoida	1.6	0.247	46	0.672065
17	27	6_x1.6_46mm_3.tif	Symphodus	0.181	Harpacticoida	1.6	0.247	46	0.732794
18	27	6_x1.6_46mm_3.tif	Symphodus	0.16	Harpacticoida	1.6	0.247	46	0.647773
19	27	6_x1.6_46mm_3.tif	Symphodus	0.165	Harpacticoida	1.6	0.247	46	0.668016
20	27	6_x1.6_46mm_3.tif	Symphodus	0.13	Harpacticoida	1.6	0.247	46	0.526316
21	27	6_x1.6_46mm_3.tif	Symphodus	0.171	Harpacticoida	1.6	0.247	46	0.692308
22	27	6_x1.6_46mm_3.tif	Symphodus	0.188	Harpacticoida	1.6	0.247	46	0.761134
23	27	6_x1.6_46mm_3.tif	Symphodus	0.213	Harpacticoida	1.6	0.247	46	0.862348
24	27	6_x1.6_46mm_3.tif	Symphodus	0.148	Harpacticoida	1.6	0.247	46	0.59919
25	27	6_x1.6_46mm_3.tif	Symphodus	0.147	Harpacticoida	1.6	0.247	46	0.595142
26	27	6_x1.6_46mm_3.tif	Symphodus	0.159	Harpacticoida	1.6	0.247	46	0.643725
1	27	7_x1.25_46mm_3.tif	Symphodus	0.152	Harpacticoida	1.25	0.153	46	0.993464
2	27	7_x1.25_46mm_3.tif	Symphodus	0.162	Harpacticoida	1.25	0.153	46	1.05882
3	27	7_x1.25_46mm_3.tif	Symphodus	0.114	Harpacticoida	1.25	0.153	46	0.745098
4	27	7_x1.25_46mm_3.tif	Symphodus	0.089	Harpacticoida	1.25	0.153	46	0.581699
5	27	7_x1.25_46mm_3.tif	Symphodus	0.112	Harpacticoida	1.25	0.153	46	0.732026
6	27	7_x1.25_46mm_3.tif	Symphodus	0.15	Harpacticoida	1.25	0.153	46	0.980392
7	27	7_x1.25_46mm_3.tif	Symphodus	0.114	Harpacticoida	1.25	0.153	46	0.745098
8	27	7_x1.25_46mm_3.tif	Symphodus	0.141	Harpacticoida	1.25	0.153	46	0.921569
9	27	7_x1.25_46mm_3.tif	Symphodus	0.191	Harpacticoida	1.25	0.153	46	1.24837
10	27	7_x1.25_46mm_3.tif	Symphodus	0.132	Harpacticoida	1.25	0.153	46	0.862745
11	27	7_x1.25_46mm_3.tif	Symphodus	0.123	Harpacticoida	1.25	0.153	46	0.803922
12	27	7_x1.25_46mm_3.tif	Symphodus	0.111	Harpacticoida	1.25	0.153	46	0.72549
13	27	7_x1.25_46mm_3.tif	Symphodus	0.1	Harpacticoida	1.25	0.153	46	0.653595
14	27	7_x1.25_46mm_3.tif	Symphodus	0.134	Harpacticoida	1.25	0.153	46	0.875817
15	27	7_x1.25_46mm_3.tif	Symphodus	0.112	Harpacticoida	1.25	0.153	46	0.732026
16	27	7_x1.25_46mm_3.tif	Symphodus	0.123	Harpacticoida	1.25	0.153	46	0.803922
17	27	7_x1.25_46mm_3.tif	Symphodus	0.09	Harpacticoida	1.25	0.153	46	0.588235
18	27	7_x1.25_46mm_3.tif	Symphodus	0.163	Harpacticoida	1.25	0.153	46	1.06536
19	27	7_x1.25_46mm_3.tif	Symphodus	0.142	Harpacticoida	1.25	0.153	46	0.928105
20	27	7_x1.25_46mm_3.tif	Symphodus	0.133	Harpacticoida	1.25	0.153	46	0.869281
21	27	7_x1.25_46mm_3.tif	Symphodus	0.163	Harpacticoida	1.25	0.153	46	1.06536
22	27	7_x1.25_46mm_3.tif	Symphodus	0.134	Harpacticoida	1.25	0.153	46	0.875817
23	27	7_x1.25_46mm_3.tif	Symphodus	0.167	Harpacticoida	1.25	0.153	46	1.0915
24	27	7_x1.25_46mm_3.tif	Symphodus	0.128	Harpacticoida	1.25	0.153	46	0.836601
25	27	7_x1.25_46mm_3.tif	Symphodus	0.13	Harpacticoida	1.25	0.153	46	0.849673
26	27	7_x1.25_46mm_3.tif	Symphodus	0.135	Harpacticoida	1.25	0.153	46	0.882353
27	27	7_x1.25_46mm_3.tif	Symphodus	0.135	Harpacticoida	1.25	0.153	46	0.882353
28	27	7_x1.25_46mm_3.tif	Symphodus	0.132	Harpacticoida	1.25	0.153	46	0.862745
29	27	7_x1.25_46mm_3.tif	Symphodus	0.145	Harpacticoida	1.25	0.153	46	0.947712
30	27	7_x1.25_46mm_3.tif	Symphodus	0.096	Harpacticoida	1.25	0.153	46	0.627451
31	27	7_x1.25_46mm_3.tif	Symphodus	0.129	Harpacticoida	1.25	0.153	46	0.843137
32	27	7_x1.25_46mm_3.tif	Symphodus	0.114	Harpacticoida	1.25	0.153	46	0.745098
33	27	7_x1.25_46mm_3.tif	Symphodus	0.105	Harpacticoida	1.25	0.153	46	0.686275
34	27	7_x1.25_46mm_3.tif	Symphodus	0.145	Harpacticoida	1.25	0.153	46	0.947712
35	27	7_x1.25_46mm_3.tif	Symphodus	0.176	Harpacticoida	1.25	0.153	46	1.15033
36	27	7_x1.25_46mm_3.tif	Symphodus	0.108	Harpacticoida	1.25	0.153	46	0.705882
37	27	7_x1.25_46mm_3.tif	Symphodus	0.119	Harpacticoida	1.25	0.153	46	0.777778
38	27	7_x1.25_46mm_3.tif	Symphodus	0.163	Harpacticoida	1.25	0.153	46	1.06536
39	27	7_x1.25_46mm_3.tif	Symphodus	0.106	Harpacticoida	1.25	0.153	46	0.69281
40	27	7_x1.25_46mm_3.tif	Symphodus	0.135	Harpacticoida	1.25	0.153	46	0.882353
41	27	7_x1.25_46mm_3.tif	Symphodus	0.116	Harpacticoida	1.25	0.153	46	0.75817
42	27	7_x1.25_46mm_3.tif	Symphodus	0.13	Harpacticoida	1.25	0.153	46	0.849673
43	27	7_x1.25_46mm_3.tif	Symphodus	0.108	Harpacticoida	1.25	0.153	46	0.705882
44	27	7_x1.25_46mm_3.tif	Symphodus	0.124	Harpacticoida	1.25	0.153	46	0.810458
45	27	7_x1.25_46mm_3.tif	Symphodus	0.133	Harpacticoida	1.25	0.153	46	0.869281
46	27	7_x1.25_46mm_3.tif	Symphodus	0.097	Harpacticoida	1.25	0.153	46	0.633987
47	27	7_x1.25_46mm_3.tif	Symphodus	0.137	Harpacticoida	1.25	0.153	46	0.895425
48	27	7_x1.25_46mm_3.tif	Symphodus	0.094	Harpacticoida	1.25	0.153	46	0.614379
49	27	7_x1.25_46mm_3.tif	Symphodus	0.133	Harpacticoida	1.25	0.153	46	0.869281
50	27	7_x1.25_46mm_3.tif	Symphodus	0.114	Harpacticoida	1.25	0.153	46	0.745098
51	27	7_x1.25_46mm_3.tif	Symphodus	0.109	Harpacticoida	1.25	0.153	46	0.712418
52	27	7_x1.25_46mm_3.tif	Symphodus	0.124	Harpacticoida	1.25	0.153	46	0.810458
53	27	7_x1.25_46mm_3.tif	Symphodus	0.103	Harpacticoida	1.25	0.153	46	0.673203
54	27	7_x1.25_46mm_3.tif	Symphodus	0.135	Harpacticoida	1.25	0.153	46	0.882353
55	27	7_x1.25_46mm_3.tif	Symphodus	0.11	Harpacticoida	1.25	0.153	46	0.718954
56	27	7_x1.25_46mm_3.tif	Symphodus	0.125	Harpacticoida	1.25	0.153	46	0.816993
1	27	8_x1.6_46mm_3.tif	Symphodus	0.175	Harpacticoida	1.6	0.247	46	0.708502
2	27	8_x1.6_46mm_3.tif	Symphodus	0.142	Harpacticoida	1.6	0.247	46	0.574899
3	27	8_x1.6_46mm_3.tif	Symphodus	0.161	Harpacticoida	1.6	0.247	46	0.651822
4	27	8_x1.6_46mm_3.tif	Symphodus	0.169	Harpacticoida	1.6	0.247	46	0.684211
5	27	8_x1.6_46mm_3.tif	Symphodus	0.212	Harpacticoida	1.6	0.247	46	0.8583
6	27	8_x1.6_46mm_3.tif	Symphodus	0.14	Harpacticoida	1.6	0.247	46	0.566802
7	27	8_x1.6_46mm_3.tif	Symphodus	0.145	Harpacticoida	1.6	0.247	46	0.587045
8	27	8_x1.6_46mm_3.tif	Symphodus	0.16	Harpacticoida	1.6	0.247	46	0.647773
9	27	8_x1.6_46mm_3.tif	Symphodus	0.182	Harpacticoida	1.6	0.247	46	0.736842
10	27	8_x1.6_46mm_3.tif	Symphodus	0.167	Harpacticoida	1.6	0.247	46	0.676113
11	27	8_x1.6_46mm_3.tif	Symphodus	0.224	Harpacticoida	1.6	0.247	46	0.906883
12	27	8_x1.6_46mm_3.tif	Symphodus	0.155	Harpacticoida	1.6	0.247	46	0.62753
13	27	8_x1.6_46mm_3.tif	Symphodus	0.177	Harpacticoida	1.6	0.247	46	0.716599
14	27	8_x1.6_46mm_3.tif	Symphodus	0.184	Harpacticoida	1.6	0.247	46	0.744939
15	27	8_x1.6_46mm_3.tif	Symphodus	0.199	Harpacticoida	1.6	0.247	46	0.805668
16	27	8_x1.6_46mm_3.tif	Symphodus	0.215	Harpacticoida	1.6	0.247	46	0.870445
17	27	8_x1.6_46mm_3.tif	Symphodus	0.184	Harpacticoida	1.6	0.247	46	0.744939
18	27	8_x1.6_46mm_3.tif	Symphodus	0.169	Harpacticoida	1.6	0.247	46	0.684211
19	27	8_x1.6_46mm_3.tif	Symphodus	0.158	Harpacticoida	1.6	0.247	46	0.639676
20	27	8_x1.6_46mm_3.tif	Symphodus	0.143	Harpacticoida	1.6	0.247	46	0.578947
21	27	8_x1.6_46mm_3.tif	Symphodus	0.141	Harpacticoida	1.6	0.247	46	0.57085
22	27	8_x1.6_46mm_3.tif	Symphodus	0.194	Harpacticoida	1.6	0.247	46	0.785425
23	27	8_x1.6_46mm_3.tif	Symphodus	0.167	Harpacticoida	1.6	0.247	46	0.676113
24	27	8_x1.6_46mm_3.tif	Symphodus	0.201	Harpacticoida	1.6	0.247	46	0.813765
25	27	8_x1.6_46mm_3.tif	Symphodus	0.173	Harpacticoida	1.6	0.247	46	0.700405
26	27	8_x1.6_46mm_3.tif	Symphodus	0.151	Harpacticoida	1.6	0.247	46	0.611336
27	27	8_x1.6_46mm_3.tif	Symphodus	0.169	Harpacticoida	1.6	0.247	46	0.684211
28	27	8_x1.6_46mm_3.tif	Symphodus	0.138	Harpacticoida	1.6	0.247	46	0.558704
29	27	8_x1.6_46mm_3.tif	Symphodus	0.202	Harpacticoida	1.6	0.247	46	0.817814
30	27	8_x1.6_46mm_3.tif	Symphodus	0.157	Harpacticoida	1.6	0.247	46	0.635628
31	27	8_x1.6_46mm_3.tif	Symphodus	0.164	Harpacticoida	1.6	0.247	46	0.663968
32	27	8_x1.6_46mm_3.tif	Symphodus	0.172	Harpacticoida	1.6	0.247	46	0.696356
2	28	9_x1.6_60mm_4.tif	Symphodus	0.16	Harpacticoida	1.6	0.247	60	0.647773
3	28	9_x1.6_60mm_4.tif	Symphodus	0.181	Harpacticoida	1.6	0.247	60	0.732794
4	28	9_x1.6_60mm_4.tif	Symphodus	0.184	Harpacticoida	1.6	0.247	60	0.744939
5	28	9_x1.6_60mm_4.tif	Symphodus	0.17	Harpacticoida	1.6	0.247	60	0.688259
6	28	9_x1.6_60mm_4.tif	Symphodus	0.159	Harpacticoida	1.6	0.247	60	0.643725
7	28	9_x1.6_60mm_4.tif	Symphodus	0.174	Harpacticoida	1.6	0.247	60	0.704453
8	28	9_x1.6_60mm_4.tif	Symphodus	0.12	Harpacticoida	1.6	0.247	60	0.48583
9	28	9_x1.6_60mm_4.tif	Symphodus	0.206	Harpacticoida	1.6	0.247	60	0.834008
10	28	9_x1.6_60mm_4.tif	Symphodus	0.16	Harpacticoida	1.6	0.247	60	0.647773
11	28	9_x1.6_60mm_4.tif	Symphodus	0.196	Harpacticoida	1.6	0.247	60	0.793522
12	28	9_x1.6_60mm_4.tif	Symphodus	0.172	Harpacticoida	1.6	0.247	60	0.696356
13	28	9_x1.6_60mm_4.tif	Symphodus	0.18	Harpacticoida	1.6	0.247	60	0.728745
14	28	9_x1.6_60mm_4.tif	Symphodus	0.191	Harpacticoida	1.6	0.247	60	0.773279
15	28	9_x1.6_60mm_4.tif	Symphodus	0.157	Harpacticoida	1.6	0.247	60	0.635628
16	28	9_x1.6_60mm_4.tif	Symphodus	0.143	Harpacticoida	1.6	0.247	60	0.578947
19	28	9_x1.6_60mm_4.tif	Symphodus	0.145	Harpacticoida	1.6	0.247	60	0.587045
20	28	9_x1.6_60mm_4.tif	Symphodus	0.189	Harpacticoida	1.6	0.247	60	0.765182
21	28	9_x1.6_60mm_4.tif	Symphodus	0.192	Harpacticoida	1.6	0.247	60	0.777328
22	28	9_x1.6_60mm_4.tif	Symphodus	0.191	Harpacticoida	1.6	0.247	60	0.773279
23	28	9_x1.6_60mm_4.tif	Symphodus	0.164	Harpacticoida	1.6	0.247	60	0.663968
9	29	10_x1.25_65mm_5.tif	Symphodus	0.166	Harpacticoida	1.25	0.153	65	1.08497
4	30	12_x1.6_60mm_6.tif	Symphodus	0.238	Harpacticoida	1.6	0.247	60	0.963563
5	30	12_x1.6_60mm_6.tif	Symphodus	0.204	Harpacticoida	1.6	0.247	60	0.825911
6	30	12_x1.6_60mm_6.tif	Symphodus	0.188	Harpacticoida	1.6	0.247	60	0.761134
7	30	12_x1.6_60mm_6.tif	Symphodus	0.249	Harpacticoida	1.6	0.247	60	1.0081
11	30	12_x1.6_60mm_6.tif	Symphodus	0.175	Harpacticoida	1.6	0.247	60	0.708502
1	30	13_x1.6_60mm_6.tif	Symphodus	0.134	Harpacticoida	1.6	0.247	60	0.54251
2	30	13_x1.6_60mm_6.tif	Symphodus	0.208	Harpacticoida	1.6	0.247	60	0.842105
3	30	13_x1.6_60mm_6.tif	Symphodus	0.197	Harpacticoida	1.6	0.247	60	0.797571
4	30	13_x1.6_60mm_6.tif	Symphodus	0.209	Harpacticoida	1.6	0.247	60	0.846154
5	30	13_x1.6_60mm_6.tif	Symphodus	0.157	Harpacticoida	1.6	0.247	60	0.635628
6	30	13_x1.6_60mm_6.tif	Symphodus	0.109	Harpacticoida	1.6	0.247	60	0.441296
7	30	13_x1.6_60mm_6.tif	Symphodus	0.164	Harpacticoida	1.6	0.247	60	0.663968
8	30	13_x1.6_60mm_6.tif	Symphodus	0.142	Harpacticoida	1.6	0.247	60	0.574899
9	30	13_x1.6_60mm_6.tif	Symphodus	0.159	Harpacticoida	1.6	0.247	60	0.643725
10	30	13_x1.6_60mm_6.tif	Symphodus	0.165	Harpacticoida	1.6	0.247	60	0.668016
11	30	13_x1.6_60mm_6.tif	Symphodus	0.163	Harpacticoida	1.6	0.247	60	0.659919
12	30	13_x1.6_60mm_6.tif	Symphodus	0.196	Harpacticoida	1.6	0.247	60	0.793522
13	30	13_x1.6_60mm_6.tif	Symphodus	0.168	Harpacticoida	1.6	0.247	60	0.680162
14	30	13_x1.6_60mm_6.tif	Symphodus	0.241	Harpacticoida	1.6	0.247	60	0.975709
15	30	13_x1.6_60mm_6.tif	Symphodus	0.179	Harpacticoida	1.6	0.247	60	0.724696
16	30	13_x1.6_60mm_6.tif	Symphodus	0.204	Harpacticoida	1.6	0.247	60	0.825911
17	30	13_x1.6_60mm_6.tif	Symphodus	0.227	Harpacticoida	1.6	0.247	60	0.919028
11	31	14_x1.25_67mm_7.tif	Symphodus	0.259	Harpacticoida	1.25	0.153	67	1.69281
1	32	15_x1.25_50mm_8.tif	Symphodus	0.167	Harpacticoida	1.25	0.153	50	1.0915
2	32	15_x1.25_50mm_8.tif	Symphodus	0.2	Harpacticoida	1.25	0.153	50	1.30719
3	32	15_x1.25_50mm_8.tif	Symphodus	0.148	Harpacticoida	1.25	0.153	50	0.96732
4	32	15_x1.25_50mm_8.tif	Symphodus	0.135	Harpacticoida	1.25	0.153	50	0.882353
5	32	15_x1.25_50mm_8.tif	Symphodus	0.161	Harpacticoida	1.25	0.153	50	1.05229
6	32	15_x1.25_50mm_8.tif	Symphodus	0.15	Harpacticoida	1.25	0.153	50	0.980392
7	32	15_x1.25_50mm_8.tif	Symphodus	0.165	Harpacticoida	1.25	0.153	50	1.07843
8	32	15_x1.25_50mm_8.tif	Symphodus	0.164	Harpacticoida	1.25	0.153	50	1.0719
9	32	15_x1.25_50mm_8.tif	Symphodus	0.212	Harpacticoida	1.25	0.153	50	1.38562
10	32	15_x1.25_50mm_8.tif	Symphodus	0.138	Harpacticoida	1.25	0.153	50	0.901961
11	32	15_x1.25_50mm_8.tif	Symphodus	0.133	Harpacticoida	1.25	0.153	50	0.869281
12	32	15_x1.25_50mm_8.tif	Symphodus	0.13	Harpacticoida	1.25	0.153	50	0.849673
13	32	15_x1.25_50mm_8.tif	Symphodus	0.229	Harpacticoida	1.25	0.153	50	1.49673
14	32	15_x1.25_50mm_8.tif	Symphodus	0.145	Harpacticoida	1.25	0.153	50	0.947712
15	32	15_x1.25_50mm_8.tif	Symphodus	0.138	Harpacticoida	1.25	0.153	50	0.901961
16	32	15_x1.25_50mm_8.tif	Symphodus	0.157	Harpacticoida	1.25	0.153	50	1.02614
17	32	15_x1.25_50mm_8.tif	Symphodus	0.139	Harpacticoida	1.25	0.153	50	0.908497
18	32	15_x1.25_50mm_8.tif	Symphodus	0.112	Harpacticoida	1.25	0.153	50	0.732026
19	32	15_x1.25_50mm_8.tif	Symphodus	0.127	Harpacticoida	1.25	0.153	50	0.830065
20	32	15_x1.25_50mm_8.tif	Symphodus	0.086	Harpacticoida	1.25	0.153	50	0.562092
21	32	15_x1.25_50mm_8.tif	Symphodus	0.133	Harpacticoida	1.25	0.153	50	0.869281
22	32	15_x1.25_50mm_8.tif	Symphodus	0.186	Harpacticoida	1.25	0.153	50	1.21569
23	32	15_x1.25_50mm_8.tif	Symphodus	0.134	Harpacticoida	1.25	0.153	50	0.875817
24	32	15_x1.25_50mm_8.tif	Symphodus	0.155	Harpacticoida	1.25	0.153	50	1.01307
1	32	16_x2.0_50mm_8.tif	Symphodus	0.223	Harpacticoida	2	0.31	50	0.719355
2	32	16_x2.0_50mm_8.tif	Symphodus	0.239	Harpacticoida	2	0.31	50	0.770968
3	32	16_x2.0_50mm_8.tif	Symphodus	0.312	Harpacticoida	2	0.31	50	1.00645
4	32	16_x2.0_50mm_8.tif	Symphodus	0.225	Harpacticoida	2	0.31	50	0.725806
1	33	17_x1.0_54mm_9.tif	Symphodus	0.137	Harpacticoida	1	0.153	54	0.895425
2	33	17_x1.0_54mm_9.tif	Symphodus	0.102	Harpacticoida	1	0.153	54	0.666667
3	33	17_x1.0_54mm_9.tif	Symphodus	0.109	Harpacticoida	1	0.153	54	0.712418
4	33	17_x1.0_54mm_9.tif	Symphodus	0.147	Harpacticoida	1	0.153	54	0.960784
5	33	17_x1.0_54mm_9.tif	Symphodus	0.096	Harpacticoida	1	0.153	54	0.627451
6	33	17_x1.0_54mm_9.tif	Symphodus	0.151	Harpacticoida	1	0.153	54	0.986928
7	33	17_x1.0_54mm_9.tif	Symphodus	0.127	Harpacticoida	1	0.153	54	0.830065
8	33	17_x1.0_54mm_9.tif	Symphodus	0.122	Harpacticoida	1	0.153	54	0.797386
9	33	17_x1.0_54mm_9.tif	Symphodus	0.129	Harpacticoida	1	0.153	54	0.843137
10	33	17_x1.0_54mm_9.tif	Symphodus	0.073	Harpacticoida	1	0.153	54	0.477124
11	33	17_x1.0_54mm_9.tif	Symphodus	0.107	Harpacticoida	1	0.153	54	0.699346
12	33	17_x1.0_54mm_9.tif	Symphodus	0.098	Harpacticoida	1	0.153	54	0.640523
13	33	17_x1.0_54mm_9.tif	Symphodus	0.1	Harpacticoida	1	0.153	54	0.653595
14	33	17_x1.0_54mm_9.tif	Symphodus	0.097	Harpacticoida	1	0.153	54	0.633987
15	33	17_x1.0_54mm_9.tif	Symphodus	0.121	Harpacticoida	1	0.153	54	0.79085
16	33	17_x1.0_54mm_9.tif	Symphodus	0.124	Harpacticoida	1	0.153	54	0.810458
17	33	17_x1.0_54mm_9.tif	Symphodus	0.116	Harpacticoida	1	0.153	54	0.75817
18	33	17_x1.0_54mm_9.tif	Symphodus	0.125	Harpacticoida	1	0.153	54	0.816993
1	33	18_x1.25_54mm_9.tif	Symphodus	0.301	Harpacticoida	1.25	0.153	54	1.96732
2	33	18_x1.25_54mm_9.tif	Symphodus	0.445	Harpacticoida	1.25	0.153	54	2.9085
3	33	18_x1.25_54mm_9.tif	Symphodus	0.362	Harpacticoida	1.25	0.153	54	2.36601
4	33	18_x1.25_54mm_9.tif	Symphodus	0.247	Harpacticoida	1.25	0.153	54	1.61438
5	33	18_x1.25_54mm_9.tif	Symphodus	0.312	Harpacticoida	1.25	0.153	54	2.03922
6	33	18_x1.25_54mm_9.tif	Symphodus	0.26	Harpacticoida	1.25	0.153	54	1.69935
8	33	18_x1.25_54mm_9.tif	Symphodus	0.253	Harpacticoida	1.25	0.153	54	1.65359
9	33	18_x1.25_54mm_9.tif	Symphodus	0.322	Harpacticoida	1.25	0.153	54	2.10458
10	33	18_x1.25_54mm_9.tif	Symphodus	0.146	Harpacticoida	1.25	0.153	54	0.954248
11	33	18_x1.25_54mm_9.tif	Symphodus	0.153	Harpacticoida	1.25	0.153	54	1
12	33	18_x1.25_54mm_9.tif	Symphodus	0.144	Harpacticoida	1.25	0.153	54	0.941176
13	33	18_x1.25_54mm_9.tif	Symphodus	0.114	Harpacticoida	1.25	0.153	54	0.745098
14	33	18_x1.25_54mm_9.tif	Symphodus	0.127	Harpacticoida	1.25	0.153	54	0.830065
15	33	18_x1.25_54mm_9.tif	Symphodus	0.142	Harpacticoida	1.25	0.153	54	0.928105
16	33	18_x1.25_54mm_9.tif	Symphodus	0.151	Harpacticoida	1.25	0.153	54	0.986928
17	33	18_x1.25_54mm_9.tif	Symphodus	0.147	Harpacticoida	1.25	0.153	54	0.960784
18	33	18_x1.25_54mm_9.tif	Symphodus	0.156	Harpacticoida	1.25	0.153	54	1.01961
19	33	18_x1.25_54mm_9.tif	Symphodus	0.155	Harpacticoida	1.25	0.153	54	1.01307
20	33	18_x1.25_54mm_9.tif	Symphodus	0.144	Harpacticoida	1.25	0.153	54	0.941176
21	33	18_x1.25_54mm_9.tif	Symphodus	0.13	Harpacticoida	1.25	0.153	54	0.849673
22	33	18_x1.25_54mm_9.tif	Symphodus	0.143	Harpacticoida	1.25	0.153	54	0.934641
23	33	18_x1.25_54mm_9.tif	Symphodus	0.127	Harpacticoida	1.25	0.153	54	0.830065
24	33	18_x1.25_54mm_9.tif	Symphodus	0.154	Harpacticoida	1.25	0.153	54	1.00654
25	33	18_x1.25_54mm_9.tif	Symphodus	0.146	Harpacticoida	1.25	0.153	54	0.954248
26	33	18_x1.25_54mm_9.tif	Symphodus	0.121	Harpacticoida	1.25	0.153	54	0.79085
27	33	18_x1.25_54mm_9.tif	Symphodus	0.131	Harpacticoida	1.25	0.153	54	0.856209
28	33	18_x1.25_54mm_9.tif	Symphodus	0.138	Harpacticoida	1.25	0.153	54	0.901961
1	34	19_x1.25_62mm_10.tif	Symphodus	0.166	Harpacticoida	1.25	0.153	62	1.08497
2	34	19_x1.25_62mm_10.tif	Symphodus	0.132	Harpacticoida	1.25	0.153	62	0.862745
3	34	19_x1.25_62mm_10.tif	Symphodus	0.12	Harpacticoida	1.25	0.153	62	0.784314
4	34	19_x1.25_62mm_10.tif	Symphodus	0.152	Harpacticoida	1.25	0.153	62	0.993464
5	34	19_x1.25_62mm_10.tif	Symphodus	0.145	Harpacticoida	1.25	0.153	62	0.947712
6	34	19_x1.25_62mm_10.tif	Symphodus	0.124	Harpacticoida	1.25	0.153	62	0.810458
7	34	19_x1.25_62mm_10.tif	Symphodus	0.124	Harpacticoida	1.25	0.153	62	0.810458
8	34	19_x1.25_62mm_10.tif	Symphodus	0.157	Harpacticoida	1.25	0.153	62	1.02614
9	34	19_x1.25_62mm_10.tif	Symphodus	0.144	Harpacticoida	1.25	0.153	62	0.941176
10	34	19_x1.25_62mm_10.tif	Symphodus	0.132	Harpacticoida	1.25	0.153	62	0.862745
11	34	19_x1.25_62mm_10.tif	Symphodus	0.127	Harpacticoida	1.25	0.153	62	0.830065
12	34	19_x1.25_62mm_10.tif	Symphodus	0.118	Harpacticoida	1.25	0.153	62	0.771242
13	34	19_x1.25_62mm_10.tif	Symphodus	0.18	Harpacticoida	1.25	0.153	62	1.17647
14	34	19_x1.25_62mm_10.tif	Symphodus	0.086	Harpacticoida	1.25	0.153	62	0.562092
15	34	19_x1.25_62mm_10.tif	Symphodus	0.116	Harpacticoida	1.25	0.153	62	0.75817
16	34	19_x1.25_62mm_10.tif	Symphodus	0.13	Harpacticoida	1.25	0.153	62	0.849673
17	34	19_x1.25_62mm_10.tif	Symphodus	0.182	Harpacticoida	1.25	0.153	62	1.18954
18	34	19_x1.25_62mm_10.tif	Symphodus	0.139	Harpacticoida	1.25	0.153	62	0.908497
19	34	19_x1.25_62mm_10.tif	Symphodus	0.133	Harpacticoida	1.25	0.153	62	0.869281
20	34	19_x1.25_62mm_10.tif	Symphodus	0.127	Harpacticoida	1.25	0.153	62	0.830065
21	34	19_x1.25_62mm_10.tif	Symphodus	0.139	Harpacticoida	1.25	0.153	62	0.908497
22	34	19_x1.25_62mm_10.tif	Symphodus	0.144	Harpacticoida	1.25	0.153	62	0.941176
23	34	19_x1.25_62mm_10.tif	Symphodus	0.149	Harpacticoida	1.25	0.153	62	0.973856
1	34	20_x1.25_62mm_10.tif	Symphodus	0.118	Harpacticoida	1.25	0.153	62	0.771242
2	34	20_x1.25_62mm_10.tif	Symphodus	0.131	Harpacticoida	1.25	0.153	62	0.856209
3	34	20_x1.25_62mm_10.tif	Symphodus	0.12	Harpacticoida	1.25	0.153	62	0.784314
4	34	20_x1.25_62mm_10.tif	Symphodus	0.088	Harpacticoida	1.25	0.153	62	0.575163
5	34	20_x1.25_62mm_10.tif	Symphodus	0.17	Harpacticoida	1.25	0.153	62	1.11111
6	34	20_x1.25_62mm_10.tif	Symphodus	0.122	Harpacticoida	1.25	0.153	62	0.797386
7	34	20_x1.25_62mm_10.tif	Symphodus	0.12	Harpacticoida	1.25	0.153	62	0.784314
8	34	20_x1.25_62mm_10.tif	Symphodus	0.131	Harpacticoida	1.25	0.153	62	0.856209
9	34	20_x1.25_62mm_10.tif	Symphodus	0.134	Harpacticoida	1.25	0.153	62	0.875817
10	34	20_x1.25_62mm_10.tif	Symphodus	0.104	Harpacticoida	1.25	0.153	62	0.679739
11	34	20_x1.25_62mm_10.tif	Symphodus	0.08	Harpacticoida	1.25	0.153	62	0.522876
12	34	20_x1.25_62mm_10.tif	Symphodus	0.114	Harpacticoida	1.25	0.153	62	0.745098
13	34	20_x1.25_62mm_10.tif	Symphodus	0.126	Harpacticoida	1.25	0.153	62	0.823529
14	34	20_x1.25_62mm_10.tif	Symphodus	0.115	Harpacticoida	1.25	0.153	62	0.751634
15	34	20_x1.25_62mm_10.tif	Symphodus	0.113	Harpacticoida	1.25	0.153	62	0.738562
16	34	20_x1.25_62mm_10.tif	Symphodus	0.135	Harpacticoida	1.25	0.153	62	0.882353
17	34	20_x1.25_62mm_10.tif	Symphodus	0.119	Harpacticoida	1.25	0.153	62	0.777778
18	34	20_x1.25_62mm_10.tif	Symphodus	0.124	Harpacticoida	1.25	0.153	62	0.810458
19	34	20_x1.25_62mm_10.tif	Symphodus	0.12	Harpacticoida	1.25	0.153	62	0.784314
20	34	20_x1.25_62mm_10.tif	Symphodus	0.097	Harpacticoida	1.25	0.153	62	0.633987
21	34	20_x1.25_62mm_10.tif	Symphodus	0.116	Harpacticoida	1.25	0.153	62	0.75817
22	34	20_x1.25_62mm_10.tif	Symphodus	0.151	Harpacticoida	1.25	0.153	62	0.986928
23	34	20_x1.25_62mm_10.tif	Symphodus	0.112	Harpacticoida	1.25	0.153	62	0.732026
24	34	20_x1.25_62mm_10.tif	Symphodus	0.156	Harpacticoida	1.25	0.153	62	1.01961
25	34	20_x1.25_62mm_10.tif	Symphodus	0.125	Harpacticoida	1.25	0.153	62	0.816993
26	34	20_x1.25_62mm_10.tif	Symphodus	0.082	Harpacticoida	1.25	0.153	62	0.535948
27	34	20_x1.25_62mm_10.tif	Symphodus	0.116	Harpacticoida	1.25	0.153	62	0.75817
28	34	20_x1.25_62mm_10.tif	Symphodus	0.148	Harpacticoida	1.25	0.153	62	0.96732
29	34	20_x1.25_62mm_10.tif	Symphodus	0.145	Harpacticoida	1.25	0.153	62	0.947712
30	34	20_x1.25_62mm_10.tif	Symphodus	0.113	Harpacticoida	1.25	0.153	62	0.738562
31	34	20_x1.25_62mm_10.tif	Symphodus	0.127	Harpacticoida	1.25	0.153	62	0.830065
32	34	20_x1.25_62mm_10.tif	Symphodus	0.11	Harpacticoida	1.25	0.153	62	0.718954
33	34	20_x1.25_62mm_10.tif	Symphodus	0.134	Harpacticoida	1.25	0.153	62	0.875817
1	34	21_x2.0_62mm_10.tif	Symphodus	0.202	Harpacticoida	2	0.31	62	0.651613
2	34	21_x2.0_62mm_10.tif	Symphodus	0.165	Harpacticoida	2	0.31	62	0.532258
3	34	21_x2.0_62mm_10.tif	Symphodus	0.234	Harpacticoida	2	0.31	62	0.754839
4	34	21_x2.0_62mm_10.tif	Symphodus	0.157	Harpacticoida	2	0.31	62	0.506452
5	34	21_x2.0_62mm_10.tif	Symphodus	0.202	Harpacticoida	2	0.31	62	0.651613
6	34	21_x2.0_62mm_10.tif	Symphodus	0.34	Harpacticoida	2	0.31	62	1.09677
7	34	21_x2.0_62mm_10.tif	Symphodus	0.29	Harpacticoida	2	0.31	62	0.935484
8	34	21_x2.0_62mm_10.tif	Symphodus	0.169	Harpacticoida	2	0.31	62	0.545161
9	34	21_x2.0_62mm_10.tif	Symphodus	0.178	Harpacticoida	2	0.31	62	0.574194
10	34	21_x2.0_62mm_10.tif	Symphodus	0.178	Harpacticoida	2	0.31	62	0.574194
11	34	21_x2.0_62mm_10.tif	Symphodus	0.201	Harpacticoida	2	0.31	62	0.648387
12	34	21_x2.0_62mm_10.tif	Symphodus	0.255	Harpacticoida	2	0.31	62	0.822581
13	34	21_x2.0_62mm_10.tif	Symphodus	0.173	Harpacticoida	2	0.31	62	0.558065
1	35	22_x1.6_53mm_11.tif	Symphodus	0.147	Harpacticoida	1.6	0.247	53	0.595142
2	35	22_x1.6_53mm_11.tif	Symphodus	0.158	Harpacticoida	1.6	0.247	53	0.639676
3	35	22_x1.6_53mm_11.tif	Symphodus	0.173	Harpacticoida	1.6	0.247	53	0.700405
4	35	22_x1.6_53mm_11.tif	Symphodus	0.17	Harpacticoida	1.6	0.247	53	0.688259
5	35	22_x1.6_53mm_11.tif	Symphodus	0.14	Harpacticoida	1.6	0.247	53	0.566802
6	35	22_x1.6_53mm_11.tif	Symphodus	0.163	Harpacticoida	1.6	0.247	53	0.659919
7	35	22_x1.6_53mm_11.tif	Symphodus	0.187	Harpacticoida	1.6	0.247	53	0.757085
8	35	22_x1.6_53mm_11.tif	Symphodus	0.16	Harpacticoida	1.6	0.247	53	0.647773
9	35	22_x1.6_53mm_11.tif	Symphodus	0.184	Harpacticoida	1.6	0.247	53	0.744939
10	35	22_x1.6_53mm_11.tif	Symphodus	0.166	Harpacticoida	1.6	0.247	53	0.672065
11	35	22_x1.6_53mm_11.tif	Symphodus	0.145	Harpacticoida	1.6	0.247	53	0.587045
12	35	22_x1.6_53mm_11.tif	Symphodus	0.173	Harpacticoida	1.6	0.247	53	0.700405
13	35	22_x1.6_53mm_11.tif	Symphodus	0.146	Harpacticoida	1.6	0.247	53	0.591093
14	35	22_x1.6_53mm_11.tif	Symphodus	0.162	Harpacticoida	1.6	0.247	53	0.65587
15	35	22_x1.6_53mm_11.tif	Symphodus	0.121	Harpacticoida	1.6	0.247	53	0.489879
16	35	22_x1.6_53mm_11.tif	Symphodus	0.156	Harpacticoida	1.6	0.247	53	0.631579
17	35	22_x1.6_53mm_11.tif	Symphodus	0.18	Harpacticoida	1.6	0.247	53	0.728745
18	35	22_x1.6_53mm_11.tif	Symphodus	0.173	Harpacticoida	1.6	0.247	53	0.700405
19	35	22_x1.6_53mm_11.tif	Symphodus	0.178	Harpacticoida	1.6	0.247	53	0.720648
20	35	22_x1.6_53mm_11.tif	Symphodus	0.163	Harpacticoida	1.6	0.247	53	0.659919
21	35	22_x1.6_53mm_11.tif	Symphodus	0.164	Harpacticoida	1.6	0.247	53	0.663968
22	35	22_x1.6_53mm_11.tif	Symphodus	0.168	Harpacticoida	1.6	0.247	53	0.680162
23	35	22_x1.6_53mm_11.tif	Symphodus	0.147	Harpacticoida	1.6	0.247	53	0.595142
24	35	22_x1.6_53mm_11.tif	Symphodus	0.188	Harpacticoida	1.6	0.247	53	0.761134
25	35	22_x1.6_53mm_11.tif	Symphodus	0.157	Harpacticoida	1.6	0.247	53	0.635628
1	35	23_x1.6_53mm_11.tif	Symphodus	0.139	Harpacticoida	1.6	0.247	53	0.562753
2	35	23_x1.6_53mm_11.tif	Symphodus	0.134	Harpacticoida	1.6	0.247	53	0.54251
3	35	23_x1.6_53mm_11.tif	Symphodus	0.163	Harpacticoida	1.6	0.247	53	0.659919
4	35	23_x1.6_53mm_11.tif	Symphodus	0.141	Harpacticoida	1.6	0.247	53	0.57085
5	35	23_x1.6_53mm_11.tif	Symphodus	0.13	Harpacticoida	1.6	0.247	53	0.526316
6	35	23_x1.6_53mm_11.tif	Symphodus	0.116	Harpacticoida	1.6	0.247	53	0.469636
7	35	23_x1.6_53mm_11.tif	Symphodus	0.175	Harpacticoida	1.6	0.247	53	0.708502
8	35	23_x1.6_53mm_11.tif	Symphodus	0.1	Harpacticoida	1.6	0.247	53	0.404858
9	35	23_x1.6_53mm_11.tif	Symphodus	0.118	Harpacticoida	1.6	0.247	53	0.477733
1	36	1_x2.0_41mm_1.tif	Symphodus	0.183	Harpacticoida	2	0.31	41	0.590323
2	36	1_x2.0_41mm_1.tif	Symphodus	0.264	Harpacticoida	2	0.31	41	0.851613
3	36	1_x2.0_41mm_1.tif	Symphodus	0.35	Harpacticoida	2	0.31	41	1.12903
4	36	1_x2.0_41mm_1.tif	Symphodus	0.24	Harpacticoida	2	0.31	41	0.774194
5	36	1_x2.0_41mm_1.tif	Symphodus	0.129	Harpacticoida	2	0.31	41	0.416129
6	36	1_x2.0_41mm_1.tif	Symphodus	0.1	Harpacticoida	2	0.31	41	0.322581
7	36	1_x2.0_41mm_1.tif	Symphodus	0.117	Harpacticoida	2	0.31	41	0.377419
5	37	3_x2.0_50mm_3.tif	Symphodus	0.299	Harpacticoida	2	0.31	50	0.964516
1	38	4_x1.6_57mm_4.tif	Symphodus	0.244	Harpacticoida	1.6	0.247	57	0.987854
2	38	4_x1.6_57mm_4.tif	Symphodus	0.13	Harpacticoida	1.6	0.247	57	0.526316
1	39	5_x1.6_47mm_5.tif	Symphodus	0.208	Harpacticoida	1.6	0.247	47	0.842105
2	39	5_x1.6_47mm_5.tif	Symphodus	0.129	Harpacticoida	1.6	0.247	47	0.522267
3	39	5_x1.6_47mm_5.tif	Symphodus	0.145	Harpacticoida	1.6	0.247	47	0.587045
4	39	5_x1.6_47mm_5.tif	Symphodus	0.23	Harpacticoida	1.6	0.247	47	0.931174
11	39	5_x1.6_47mm_5.tif	Symphodus	0.28	Harpacticoida	1.6	0.247	47	1.1336
13	40	6_x1.6_43mm_6.tif	Symphodus	0.215	Harpacticoida	1.6	0.247	43	0.870445
7	41	7_x1.25_59mm_7.tif	Symphodus	0.214	Harpacticoida	1.25	0.153	59	1.39869
1	42	8_x2.0_38mm_8_.tif	Symphodus	0.204	Harpacticoida	2	0.31	38	0.658065
2	42	8_x2.0_38mm_8_.tif	Symphodus	0.189	Harpacticoida	2	0.31	38	0.609677
3	42	8_x2.0_38mm_8_.tif	Symphodus	0.369	Harpacticoida	2	0.31	38	1.19032
4	42	8_x2.0_38mm_8_.tif	Symphodus	0.149	Harpacticoida	2	0.31	38	0.480645
5	42	8_x2.0_38mm_8_.tif	Symphodus	0.273	Harpacticoida	2	0.31	38	0.880645
6	42	8_x2.0_38mm_8_.tif	Symphodus	0.182	Harpacticoida	2	0.31	38	0.587097
7	42	8_x2.0_38mm_8_.tif	Symphodus	0.213	Harpacticoida	2	0.31	38	0.687097
8	42	8_x2.0_38mm_8_.tif	Symphodus	0.209	Harpacticoida	2	0.31	38	0.674194
9	42	8_x2.0_38mm_8_.tif	Symphodus	0.154	Harpacticoida	2	0.31	38	0.496774
10	42	8_x2.0_38mm_8_.tif	Symphodus	0.217	Harpacticoida	2	0.31	38	0.7
11	42	8_x2.0_38mm_8_.tif	Symphodus	0.261	Harpacticoida	2	0.31	38	0.841935
12	42	8_x2.0_38mm_8_.tif	Symphodus	0.165	Harpacticoida	2	0.31	38	0.532258
14	42	8_x2.0_38mm_8_.tif	Symphodus	0.264	Harpacticoida	2	0.31	38	0.851613
15	42	8_x2.0_38mm_8_.tif	Symphodus	0.277	Harpacticoida	2	0.31	38	0.893548
1	46	12_x2.5_47mm_12.tif	Symphodus	0.243	Harpacticoida	2.5	0.39	47	0.623077
2	46	12_x2.5_47mm_12.tif	Symphodus	0.32	Harpacticoida	2.5	0.39	47	0.820513
3	46	12_x2.5_47mm_12.tif	Symphodus	0.302	Harpacticoida	2.5	0.39	47	0.774359
4	46	12_x2.5_47mm_12.tif	Symphodus	0.302	Harpacticoida	2.5	0.39	47	0.774359
5	46	12_x2.5_47mm_12.tif	Symphodus	0.193	Harpacticoida	2.5	0.39	47	0.494872
6	46	12_x2.5_47mm_12.tif	Symphodus	0.219	Harpacticoida	2.5	0.39	47	0.561538
7	46	12_x2.5_47mm_12.tif	Symphodus	0.274	Harpacticoida	2.5	0.39	47	0.702564
8	46	12_x2.5_47mm_12.tif	Symphodus	0.217	Harpacticoida	2.5	0.39	47	0.55641
1	47	13_x2.5_42mm_13.tif	Symphodus	0.282	Harpacticoida	2.5	0.39	42	0.723077
2	47	13_x2.5_42mm_13.tif	Symphodus	0.238	Harpacticoida	2.5	0.39	42	0.610256
3	47	13_x2.5_42mm_13.tif	Symphodus	0.214	Harpacticoida	2.5	0.39	42	0.548718
4	47	13_x2.5_42mm_13.tif	Symphodus	0.258	Harpacticoida	2.5	0.39	42	0.661538
5	47	13_x2.5_42mm_13.tif	Symphodus	0.278	Harpacticoida	2.5	0.39	42	0.712821
6	47	13_x2.5_42mm_13.tif	Symphodus	0.278	Harpacticoida	2.5	0.39	42	0.712821
7	47	13_x2.5_42mm_13.tif	Symphodus	0.192	Harpacticoida	2.5	0.39	42	0.492308
3	6	29_x3.2_34_6.tif	Symphodus	0.445	Harpacticoida	3.2	0.494	34	0.90081
2	12	57_x1.25_38_12.tif	Symphodus	0.892	Isopoda	4	0.617	38	1.44571
1	16	101_x4_28_16.tif	Symphodus	0.212	Isopoda	4	0.617	28	0.343598
1	19	142_x3.2_32_19.tif	Symphodus	0.866	Isopoda	3.2	0.494	32	1.75304
7	26	2_x1.6_58mm_2.tif	Symphodus	0.496	Isopoda	1.6	0.247	58	2.0081
28	27	6_x1.6_46mm_3.tif	Symphodus	0.698	Isopoda	1.6	0.247	46	2.82591
36	5	24_x2.5_36_.5tif.tif	Symphodus	0.094	Isopoda	2.5	0.39	36	0.241026
1	19	125_x6.3_32_19.tif	Symphodus	0.404	Isopoda	6.3	0.98	32	0.412245
2	19	126_x11.5_32_19.tif	Symphodus	0.4	Isopoda	11.5	1.837	32	0.217746
1	21	163.b_10_36_21.tif	Symphodus	0.579	Majidae	10	1.56	36	0.371154
2	21	163.b_10_36_21.tif	Symphodus	0.309	Majidae	10	1.56	36	0.198077
1	21	163_x5_36_21.tif	Symphodus	0.149	Majidae	5	0.78	36	0.191026
2	21	163_x5_36_21.tif	Symphodus	0.202	Majidae	5	0.78	36	0.258974
11	10	49_x3.2_33_10.tif	Symphodus	0.121	Ostracoda	3.2	0.494	33	0.244939
2	16	94_x8_28_16.tif	Symphodus	0.902	Ostracoda	8	1.247	28	0.723336
2	19	143_x5_32_19.tif	Symphodus	0.283	Ostracoda	5	0.78	32	0.362821
9	25	1_x2.0_55mm_1.tif	Symphodus	0.143	Ostracoda	2	0.31	55	0.46129
29	35	22_x1.6_53mm_11.tif	Symphodus	0.134	Ostracoda	1.6	0.247	53	0.54251
30	35	22_x1.6_53mm_11.tif	Symphodus	0.132	Ostracoda	1.6	0.247	53	0.534413
6	4	22_x3.2_41_4.tif	Symphodus	0.232	Ostracoda	3.2	0.494	41	0.469636
11	10	49_x3.2_33_10.tif	Symphodus	0.121	Ostracoda	3.2	0.494	33	0.244939
2	36	2_x1.6_41mm_2.tif	Symphodus	0.879	Polychaeta	1.6	0.247	41	3.5587
7	38	4_x1.6_57mm_4.tif	Symphodus	1.394	Polychaeta	1.6	0.247	57	5.64372
2	44	10_x2.0_58mm_10.tif	Symphodus	0.786	Polychaeta	2	0.31	58	2.53548
8	14	73_x6.3_26_14.tif	Symphodus	0.422	Unidentified	6.3	0.98	26	0.430612
1	15	77_x3.2_28_15.tif	Symphodus	0.926	Unidentified	3.2	0.494	28	1.87449
2	16	88_x11.5_28_16.tif	Symphodus	0.146	Unidentified	11.5	1.837	28	0.0794774
5	16	101_x4_28_16.tif	Symphodus	0.56	Unidentified	4	0.617	28	0.907618
8	19	133_x4_32_19.tif	Symphodus	0.383	Unidentified	4	0.617	32	0.620746
1	19	141_x8_32_19.tif	Symphodus	1.48	Unidentified	8	1.247	32	1.18685
2	20	153_x6.3_35_20.tif	Symphodus	0.378	Unidentified	6.3	0.98	35	0.385714
3	20	153_x6.3_35_20.tif	Symphodus	0.282	Unidentified	6.3	0.98	35	0.287755
4	20	153_x6.3_35_20.tif	Symphodus	0.22	Unidentified	6.3	0.98	35	0.22449
27	27	6_x1.6_46mm_3.tif	Symphodus	0.321	Unidentified	1.6	0.247	46	1.2996
29	27	6_x1.6_46mm_3.tif	Symphodus	0.273	Unidentified	1.6	0.247	46	1.10526
8	30	12_x1.6_60mm_6.tif	Symphodus	0.25	Unidentified	1.6	0.247	60	1.01215
34	34	20_x1.25_62mm_10.tif	Symphodus	0.352	Unidentified	1.25	0.153	62	2.30065
8	10	47_x4_33_10.tif	Symphodus	0.46	Unidentified	4	0.617	33	0.745543
19	10	49_x3.2_33_10.tif	Symphodus	0.093	Unidentified	3.2	0.494	33	0.188259
1	13	71_x5_26_13.tif	Symphodus	0.709	Unidentified	5	0.78	26	0.908974
2	13	71_x5_26_13.tif	Symphodus	0.801	Unidentified	5	0.78	26	1.02692
1	16	87_x10_28_16.tif	Symphodus	0.427	Unidentified	10	1.56	28	0.273718
3	17	109_x5_32_17.tif	Symphodus	0.175	Unidentified	5	0.78	32	0.224359
1	17	113_x8_32_17.tif	Symphodus	0.654	Unidentified	8	1.247	32	0.524459
6	18	118_x5_31_18.tif	Symphodus	0.458	Unidentified	5	0.78	31	0.587179
7	18	118_x5_31_18.tif	Symphodus	0.33	Unidentified	5	0.78	31	0.423077
4	18	119_x5_31_18.tif	Symphodus	0.652	Unidentified	5	0.78	31	0.835897
6	18	119_x5_31_18.tif	Symphodus	0.423	Unidentified	5	0.78	31	0.542308
1	19	146_x3.2_32_19.tif	Symphodus	0.501	Unidentified	3.2	0.494	32	1.01417
2	20	154_x10_35_20.tif	Symphodus	0.384	Unidentified	10	1.56	35	0.246154
3	20	154_x10_35_20.tif	Symphodus	0.78	Unidentified	10	1.56	35	0.5
2	20	155_x11.5_35_20.tif	Symphodus	0.109	Unidentified	11.5	1.837	35	0.0593359
2	21	160_x11.5_36_21.tif	Symphodus	0.492	Unidentified	11.5	1.837	36	0.267828
6	21	161_x5_36_21.tif	Symphodus	0.315	Unidentified	5	0.78	36	0.403846
1	21	162_x8_36_21.tif	Symphodus	0.742	Unidentified	8	1.247	36	0.595028
9	21	163_x5_36_21.tif	Symphodus	0.405	Unidentified	5	0.78	36	0.519231
1	22	164_x3.2_39_22.tif	Symphodus	1.323	Unidentified	3.2	0.494	39	2.67814
7	22	171_x4_39_22.tif	Symphodus	0.665	Unidentified	4	0.617	39	1.0778
12	30	12_x1.6_60mm_6.tif	Symphodus	0.312	Unidentified	1.6	0.247	60	1.26316
17	36	1_x2.0_41mm_1.tif	Symphodus	0.388	Unidentified	2	0.31	41	1.25161
8	38	4_x1.6_57mm_4.tif	Symphodus	0.324	Unidentified	1.6	0.247	57	1.31174
3	44	10_x2.0_58mm_10.tif	Symphodus	0.451	Unidentified	2	0.31	58	1.45484
1	3	18_x11.5_41_3.tif	Symphodus	0.515	Zoe larvae	11.5	1.837	41	0.280348
	27510

## Sheet: Coris j.
Lno	FishID	Image	FishSp	Pixel	Taxa	Mag	cal	lengthf	lengthp
1	1	2_x6.3_60mm_1.tif	Coris julis	1.159	Amphipoda	6.3	0.98	60	1.18265
99	1	1_x1.6_61mm_1.tif	Coris julis	0.253	Bivalvia	1.6	0.247	61	1.02429
1	1	1_x11.5_60mm_1.tif	Coris julis	0.881	Foraminifera	11.5	1.837	60	0.479586
1	1	3_x3.2_60mm_1.tif	Coris julis	0.895	Gastropoda	3.2	0.494	60	1.81174
2	1	3_x3.2_60mm_1.tif	Coris julis	0.704	Gastropoda	3.2	0.494	60	1.4251
1	1	4_x5.0_60mm_1.tif	Coris julis	0.497	Gastropoda	5	0.78	60	0.637179
2	1	4_x5.0_60mm_1.tif	Coris julis	0.626	Gastropoda	5	0.78	60	0.802564
3	1	4_x5.0_60mm_1.tif	Coris julis	0.369	Gastropoda	5	0.78	60	0.473077
99	2	1_x1.6_61mm_1.tif	Coris julis	0.255	Bivalvia	1.6	0.247	61	1.03239
2	2	6_x0.71_71mm_2.tif	Coris julis	0.24	Bivalvia	2	0.31	71	0.774194
3	2	6_x0.71_71mm_2.tif	Coris julis	0.198	Bivalvia	2	0.31	71	0.63871
4	2	6_x0.71_71mm_2.tif	Coris julis	0.278	Bivalvia	2	0.31	71	0.896774
1	2	7_x4.0_71mm_2.tif	Coris julis	0.713	Harpacticoida	4	0.617	71	1.15559
99	3	1_x1.6_61mm_1.tif	Coris julis	0.281	Bivalvia	1.6	0.247	61	1.13765
1	3	10_x2.0_45mm_3.tif	Coris julis	0.252	Gastropoda	2	0.31	45	0.812903
2	3	10_x2.0_45mm_3.tif	Coris julis	0.175	Gastropoda	2	0.31	45	0.564516
3	3	10_x2.0_45mm_3.tif	Coris julis	0.165	Gastropoda	2	0.31	45	0.532258
4	3	10_x2.0_45mm_3.tif	Coris julis	0.176	Gastropoda	2	0.31	45	0.567742
5	3	10_x2.0_45mm_3.tif	Coris julis	0.141	Gastropoda	2	0.31	45	0.454839
6	3	10_x2.0_45mm_3.tif	Coris julis	0.171	Gastropoda	2	0.31	45	0.551613
7	3	10_x2.0_45mm_3.tif	Coris julis	0.139	Gastropoda	2	0.31	45	0.448387
1	3	11_6.3_45mm_3.tif	Coris julis	1.036	Gastropoda	6.3	0.98	45	1.05714
2	3	11_6.3_45mm_3.tif	Coris julis	0.444	Gastropoda	6.3	0.98	45	0.453061
1	3	12_x4.0_45mm_3.tif	Coris julis	0.586	Gastropoda	4	0.617	45	0.949757
1	3	9_x2.0_45mm_3.tif	Coris julis	0.118	Gastropoda	2	0.31	45	0.380645
2	3	9_x2.0_45mm_3.tif	Coris julis	0.101	Gastropoda	2	0.31	45	0.325806
3	3	9_x2.0_45mm_3.tif	Coris julis	0.076	Gastropoda	2	0.31	45	0.245161
4	3	9_x2.0_45mm_3.tif	Coris julis	0.149	Gastropoda	2	0.31	45	0.480645
5	3	9_x2.0_45mm_3.tif	Coris julis	0.162	Gastropoda	2	0.31	45	0.522581
6	3	9_x2.0_45mm_3.tif	Coris julis	0.179	Gastropoda	2	0.31	45	0.577419
7	3	9_x2.0_45mm_3.tif	Coris julis	0.125	Gastropoda	2	0.31	45	0.403226
99	4	2_x1.0_61mm_2.tif	Coris julis	0.139	Bivalvia	1	0.153	61	0.908497
1	4	13_x2.0_47mm_4.tif	Coris julis	0.206	Gastropoda	2	0.31	47	0.664516
2	4	13_x2.0_47mm_4.tif	Coris julis	0.118	Gastropoda	2	0.31	47	0.380645
3	4	13_x2.0_47mm_4.tif	Coris julis	0.168	Gastropoda	2	0.31	47	0.541935
4	4	13_x2.0_47mm_4.tif	Coris julis	0.181	Gastropoda	2	0.31	47	0.583871
5	4	13_x2.0_47mm_4.tif	Coris julis	0.194	Gastropoda	2	0.31	47	0.625806
6	4	13_x2.0_47mm_4.tif	Coris julis	0.103	Gastropoda	2	0.31	47	0.332258
7	4	13_x2.0_47mm_4.tif	Coris julis	0.105	Gastropoda	2	0.31	47	0.33871
8	4	13_x2.0_47mm_4.tif	Coris julis	0.154	Gastropoda	2	0.31	47	0.496774
9	4	13_x2.0_47mm_4.tif	Coris julis	0.294	Gastropoda	2	0.31	47	0.948387
10	4	13_x2.0_47mm_4.tif	Coris julis	0.156	Gastropoda	2	0.31	47	0.503226
11	4	13_x2.0_47mm_4.tif	Coris julis	0.081	Gastropoda	2	0.31	47	0.26129
1	4	14_x1.6_47mm_4.tif	Coris julis	0.181	Gastropoda	1.6	0.247	47	0.732794
2	4	14_x1.6_47mm_4.tif	Coris julis	0.101	Gastropoda	1.6	0.247	47	0.408907
3	4	14_x1.6_47mm_4.tif	Coris julis	0.326	Gastropoda	1.6	0.247	47	1.31984
4	4	14_x1.6_47mm_4.tif	Coris julis	0.213	Gastropoda	1.6	0.247	47	0.862348
5	4	14_x1.6_47mm_4.tif	Coris julis	0.13	Gastropoda	1.6	0.247	47	0.526316
6	4	14_x1.6_47mm_4.tif	Coris julis	0.157	Gastropoda	1.6	0.247	47	0.635628
7	4	14_x1.6_47mm_4.tif	Coris julis	0.135	Gastropoda	1.6	0.247	47	0.546559
1	4	15_x4.0_47mm_4.tif	Coris julis	0.564	Gastropoda	4	0.617	47	0.9141
2	4	15_x4.0_47mm_4.tif	Coris julis	0.155	Gastropoda	4	0.617	47	0.251216
3	4	15_x4.0_47mm_4.tif	Coris julis	0.267	Gastropoda	4	0.617	47	0.432739
99	5	2_x1.0_61mm_2.tif	Coris julis	0.118	Bivalvia	1	0.153	61	0.771242
12	5	17_x3.2_62mm_5.tif	Coris julis	0.283	Echinidae	3.2	0.494	62	0.572874
7	5	16_x1.6_62mm_5.tif	Coris julis	0.18	Foraminifera	1.6	0.247	62	0.728745
10	5	16_x1.6_62mm_5.tif	Coris julis	0.071	Foraminifera	1.6	0.247	62	0.287449
1	5	16_x1.6_62mm_5.tif	Coris julis	0.133	Gastropoda	1.6	0.247	62	0.538462
2	5	16_x1.6_62mm_5.tif	Coris julis	0.117	Gastropoda	1.6	0.247	62	0.473684
3	5	16_x1.6_62mm_5.tif	Coris julis	0.085	Gastropoda	1.6	0.247	62	0.34413
4	5	16_x1.6_62mm_5.tif	Coris julis	0.181	Gastropoda	1.6	0.247	62	0.732794
5	5	16_x1.6_62mm_5.tif	Coris julis	0.127	Gastropoda	1.6	0.247	62	0.51417
6	5	16_x1.6_62mm_5.tif	Coris julis	0.131	Gastropoda	1.6	0.247	62	0.530364
8	5	16_x1.6_62mm_5.tif	Coris julis	0.143	Gastropoda	1.6	0.247	62	0.578947
9	5	16_x1.6_62mm_5.tif	Coris julis	0.133	Gastropoda	1.6	0.247	62	0.538462
1	5	17_x3.2_62mm_5.tif	Coris julis	0.312	Gastropoda	3.2	0.494	62	0.631579
2	5	17_x3.2_62mm_5.tif	Coris julis	0.254	Gastropoda	3.2	0.494	62	0.51417
3	5	17_x3.2_62mm_5.tif	Coris julis	0.231	Gastropoda	3.2	0.494	62	0.467611
4	5	17_x3.2_62mm_5.tif	Coris julis	0.317	Gastropoda	3.2	0.494	62	0.6417
5	5	17_x3.2_62mm_5.tif	Coris julis	0.236	Gastropoda	3.2	0.494	62	0.477733
6	5	17_x3.2_62mm_5.tif	Coris julis	0.158	Gastropoda	3.2	0.494	62	0.319838
7	5	17_x3.2_62mm_5.tif	Coris julis	0.206	Gastropoda	3.2	0.494	62	0.417004
8	5	17_x3.2_62mm_5.tif	Coris julis	0.4	Gastropoda	3.2	0.494	62	0.809717
9	5	17_x3.2_62mm_5.tif	Coris julis	0.195	Gastropoda	3.2	0.494	62	0.394737
10	5	17_x3.2_62mm_5.tif	Coris julis	0.193	Gastropoda	3.2	0.494	62	0.390688
11	5	17_x3.2_62mm_5.tif	Coris julis	0.149	Gastropoda	3.2	0.494	62	0.301619
11	5	16_x1.6_62mm_5.tif	Coris julis	0.496	Unidentified	1.6	0.247	62	2.0081
99	6	6_x3.2_52mm_5.tif	Coris julis	0.498	Bivalvia	3.2	0.494	52	1.0081
1	6	19_x3.2_56mm_6.tif	Coris julis	0.264	Gastropoda	3.2	0.494	56	0.534413
2	6	19_x3.2_56mm_6.tif	Coris julis	0.262	Gastropoda	3.2	0.494	56	0.530364
3	6	19_x3.2_56mm_6.tif	Coris julis	0.182	Gastropoda	3.2	0.494	56	0.368421
4	6	19_x3.2_56mm_6.tif	Coris julis	0.222	Gastropoda	3.2	0.494	56	0.449393
5	6	19_x3.2_56mm_6.tif	Coris julis	0.248	Gastropoda	3.2	0.494	56	0.502024
6	6	19_x3.2_56mm_6.tif	Coris julis	0.287	Gastropoda	3.2	0.494	56	0.580972
7	6	19_x3.2_56mm_6.tif	Coris julis	0.203	Gastropoda	3.2	0.494	56	0.410931
8	6	19_x3.2_56mm_6.tif	Coris julis	0.395	Harpacticoida	3.2	0.494	56	0.799595
8	7	21_x2.5_56mm_6.tif	Coris julis	0.154	Acari	2.5	0.39	56	0.394872
16	7	23_x2.0_56mm_6.tif	Coris julis	0.444	Amphipoda	2	0.31	56	1.43226
10	7	21_x2.5_56mm_6.tif	Coris julis	0.62	Bivalvia	2.5	0.39	56	1.58974
99	7	23_x1.0_77mm_16.tif	Coris julis	0.132	Bivalvia	1	0.153	77	0.862745
1	7	20_x2.0_56mm_6.tif	Coris julis	0.137	Gastropoda	2	0.31	56	0.441935
2	7	20_x2.0_56mm_6.tif	Coris julis	0.107	Gastropoda	2	0.31	56	0.345161
3	7	20_x2.0_56mm_6.tif	Coris julis	0.141	Gastropoda	2	0.31	56	0.454839
4	7	20_x2.0_56mm_6.tif	Coris julis	0.192	Gastropoda	2	0.31	56	0.619355
5	7	20_x2.0_56mm_6.tif	Coris julis	0.254	Gastropoda	2	0.31	56	0.819355
6	7	20_x2.0_56mm_6.tif	Coris julis	0.11	Gastropoda	2	0.31	56	0.354839
7	7	20_x2.0_56mm_6.tif	Coris julis	0.165	Gastropoda	2	0.31	56	0.532258
8	7	20_x2.0_56mm_6.tif	Coris julis	0.206	Gastropoda	2	0.31	56	0.664516
9	7	20_x2.0_56mm_6.tif	Coris julis	0.154	Gastropoda	2	0.31	56	0.496774
10	7	20_x2.0_56mm_6.tif	Coris julis	0.196	Gastropoda	2	0.31	56	0.632258
1	7	21_x2.5_56mm_6.tif	Coris julis	0.226	Gastropoda	2.5	0.39	56	0.579487
2	7	21_x2.5_56mm_6.tif	Coris julis	0.277	Gastropoda	2.5	0.39	56	0.710256
3	7	21_x2.5_56mm_6.tif	Coris julis	0.173	Gastropoda	2.5	0.39	56	0.44359
4	7	21_x2.5_56mm_6.tif	Coris julis	0.146	Gastropoda	2.5	0.39	56	0.374359
5	7	21_x2.5_56mm_6.tif	Coris julis	0.264	Gastropoda	2.5	0.39	56	0.676923
6	7	21_x2.5_56mm_6.tif	Coris julis	0.181	Gastropoda	2.5	0.39	56	0.464103
7	7	21_x2.5_56mm_6.tif	Coris julis	0.149	Gastropoda	2.5	0.39	56	0.382051
1	7	22_x2.0_56mm_6.tif	Coris julis	0.116	Gastropoda	2	0.31	56	0.374194
2	7	22_x2.0_56mm_6.tif	Coris julis	0.149	Gastropoda	2	0.31	56	0.480645
3	7	22_x2.0_56mm_6.tif	Coris julis	0.208	Gastropoda	2	0.31	56	0.670968
4	7	22_x2.0_56mm_6.tif	Coris julis	0.109	Gastropoda	2	0.31	56	0.351613
5	7	22_x2.0_56mm_6.tif	Coris julis	0.129	Gastropoda	2	0.31	56	0.416129
1	7	23_x2.0_56mm_6.tif	Coris julis	0.251	Gastropoda	2	0.31	56	0.809677
2	7	23_x2.0_56mm_6.tif	Coris julis	0.181	Gastropoda	2	0.31	56	0.583871
3	7	23_x2.0_56mm_6.tif	Coris julis	0.333	Gastropoda	2	0.31	56	1.07419
4	7	23_x2.0_56mm_6.tif	Coris julis	0.199	Gastropoda	2	0.31	56	0.641935
5	7	23_x2.0_56mm_6.tif	Coris julis	0.159	Gastropoda	2	0.31	56	0.512903
6	7	23_x2.0_56mm_6.tif	Coris julis	0.144	Gastropoda	2	0.31	56	0.464516
7	7	23_x2.0_56mm_6.tif	Coris julis	0.133	Gastropoda	2	0.31	56	0.429032
8	7	23_x2.0_56mm_6.tif	Coris julis	0.15	Gastropoda	2	0.31	56	0.483871
9	7	23_x2.0_56mm_6.tif	Coris julis	0.173	Gastropoda	2	0.31	56	0.558065
10	7	23_x2.0_56mm_6.tif	Coris julis	0.119	Gastropoda	2	0.31	56	0.383871
11	7	23_x2.0_56mm_6.tif	Coris julis	0.128	Gastropoda	2	0.31	56	0.412903
12	7	23_x2.0_56mm_6.tif	Coris julis	0.102	Gastropoda	2	0.31	56	0.329032
13	7	23_x2.0_56mm_6.tif	Coris julis	0.105	Gastropoda	2	0.31	56	0.33871
14	7	23_x2.0_56mm_6.tif	Coris julis	0.132	Gastropoda	2	0.31	56	0.425806
15	7	23_x2.0_56mm_6.tif	Coris julis	0.1	Gastropoda	2	0.31	56	0.322581
11	7	20_x2.0_56mm_6.tif	Coris julis	0.293	Harpacticoida	2	0.31	56	0.945161
12	7	20_x2.0_56mm_6.tif	Coris julis	0.399	Harpacticoida	2	0.31	56	1.2871
9	7	21_x2.5_56mm_6.tif	Coris julis	0.358	Harpacticoida	2.5	0.39	56	0.917949
99	8	23_x1.0_77mm_16.tif	Coris julis	0.213	Bivalvia	1	0.153	77	1.39216
2	8	24_x2.5_45mm_07.tif	Coris julis	0.243	Foraminifera	2.5	0.39	45	0.623077
1	8	24_x2.5_45mm_07.tif	Coris julis	0.34	Gastropoda	2.5	0.39	45	0.871795
99	9	23_x1.0_77mm_16.tif	Coris julis	0.155	Bivalvia	1	0.153	77	1.01307
4	9	25_x5.0_48mm_08.tif	Coris julis	0.37	Foraminifera	5	0.78	48	0.474359
1	9	24_x4.0_48mm_8.tif	Coris julis	0.2	Gastropoda	4	0.617	48	0.324149
2	9	24_x4.0_48mm_8.tif	Coris julis	0.291	Gastropoda	4	0.617	48	0.471637
3	9	24_x4.0_48mm_8.tif	Coris julis	0.231	Gastropoda	4	0.617	48	0.374392
4	9	24_x4.0_48mm_8.tif	Coris julis	0.197	Gastropoda	4	0.617	48	0.319287
1	9	25_x5.0_48mm_08.tif	Coris julis	0.498	Gastropoda	5	0.78	48	0.638462
2	9	25_x5.0_48mm_08.tif	Coris julis	0.421	Gastropoda	5	0.78	48	0.539744
3	9	25_x5.0_48mm_08.tif	Coris julis	0.497	Gastropoda	5	0.78	48	0.637179
5	9	25_x5.0_48mm_08.tif	Coris julis	0.219	Gastropoda	5	0.78	48	0.280769
6	9	25_x5.0_48mm_08.tif	Coris julis	0.323	Gastropoda	5	0.78	48	0.414103
10	10	29_x2.5_64mm_9.tif	Coris julis	0.158	Acari	2.5	0.39	64	0.405128
11	10	29_x2.5_64mm_9.tif	Coris julis	0.2	Acari	2.5	0.39	64	0.512821
99	10	23_x1.0_77mm_16.tif	Coris julis	0.186	Bivalvia	1	0.153	77	1.21569
9	10	27_x1.6_64mm_9.tif	Coris julis	0.801	Bivalvia	1.6	0.247	64	3.24291
1	10	26_x2.5_64mm_9.tif	Coris julis	0.374	Gastropoda	2.5	0.39	64	0.958974
2	10	26_x2.5_64mm_9.tif	Coris julis	0.195	Gastropoda	2.5	0.39	64	0.5
3	10	26_x2.5_64mm_9.tif	Coris julis	0.32	Gastropoda	2.5	0.39	64	0.820513
4	10	26_x2.5_64mm_9.tif	Coris julis	0.29	Gastropoda	2.5	0.39	64	0.74359
5	10	26_x2.5_64mm_9.tif	Coris julis	0.176	Gastropoda	2.5	0.39	64	0.451282
6	10	26_x2.5_64mm_9.tif	Coris julis	0.616	Gastropoda	2.5	0.39	64	1.57949
3	10	27_x1.6_64mm_9.tif	Coris julis	0.114	Gastropoda	1.6	0.247	64	0.461538
1	10	28_x2.0_64mm_9.tif	Coris julis	0.206	Gastropoda	2	0.31	64	0.664516
2	10	28_x2.0_64mm_9.tif	Coris julis	0.25	Gastropoda	2	0.31	64	0.806452
3	10	28_x2.0_64mm_9.tif	Coris julis	0.171	Gastropoda	2	0.31	64	0.551613
4	10	28_x2.0_64mm_9.tif	Coris julis	0.156	Gastropoda	2	0.31	64	0.503226
5	10	28_x2.0_64mm_9.tif	Coris julis	0.161	Gastropoda	2	0.31	64	0.519355
6	10	28_x2.0_64mm_9.tif	Coris julis	0.254	Gastropoda	2	0.31	64	0.819355
7	10	28_x2.0_64mm_9.tif	Coris julis	0.21	Gastropoda	2	0.31	64	0.677419
8	10	28_x2.0_64mm_9.tif	Coris julis	0.207	Gastropoda	2	0.31	64	0.667742
9	10	28_x2.0_64mm_9.tif	Coris julis	0.141	Gastropoda	2	0.31	64	0.454839
10	10	28_x2.0_64mm_9.tif	Coris julis	0.23	Gastropoda	2	0.31	64	0.741935
11	10	28_x2.0_64mm_9.tif	Coris julis	0.254	Gastropoda	2	0.31	64	0.819355
12	10	28_x2.0_64mm_9.tif	Coris julis	0.287	Gastropoda	2	0.31	64	0.925806
13	10	28_x2.0_64mm_9.tif	Coris julis	0.141	Gastropoda	2	0.31	64	0.454839
1	10	29_x2.5_64mm_9.tif	Coris julis	0.26	Gastropoda	2.5	0.39	64	0.666667
2	10	29_x2.5_64mm_9.tif	Coris julis	0.228	Gastropoda	2.5	0.39	64	0.584615
3	10	29_x2.5_64mm_9.tif	Coris julis	0.271	Gastropoda	2.5	0.39	64	0.694872
4	10	29_x2.5_64mm_9.tif	Coris julis	0.288	Gastropoda	2.5	0.39	64	0.738462
5	10	29_x2.5_64mm_9.tif	Coris julis	0.198	Gastropoda	2.5	0.39	64	0.507692
6	10	29_x2.5_64mm_9.tif	Coris julis	0.289	Gastropoda	2.5	0.39	64	0.741026
7	10	29_x2.5_64mm_9.tif	Coris julis	0.235	Gastropoda	2.5	0.39	64	0.602564
8	10	29_x2.5_64mm_9.tif	Coris julis	0.222	Gastropoda	2.5	0.39	64	0.569231
9	10	29_x2.5_64mm_9.tif	Coris julis	0.163	Gastropoda	2.5	0.39	64	0.417949
1	10	27_x1.6_64mm_9.tif	Coris julis	0.253	Harpacticoida	1.6	0.247	64	1.02429
2	10	27_x1.6_64mm_9.tif	Coris julis	0.309	Harpacticoida	1.6	0.247	64	1.25101
14	10	28_x2.0_64mm_9.tif	Coris julis	0.319	Harpacticoida	2	0.31	64	1.02903
4	10	27_x1.6_64mm_9.tif	Coris julis	0.358	Polychaeta	1.6	0.247	64	1.44939
5	10	27_x1.6_64mm_9.tif	Coris julis	0.864	Polychaeta	1.6	0.247	64	3.49798
6	10	27_x1.6_64mm_9.tif	Coris julis	0.537	Polychaeta	1.6	0.247	64	2.17409
7	10	27_x1.6_64mm_9.tif	Coris julis	0.779	Polychaeta	1.6	0.247	64	3.15385
8	10	27_x1.6_64mm_9.tif	Coris julis	0.957	Polychaeta	1.6	0.247	64	3.87449
5	11	31_x1.6_70mm_10.tif	Coris julis	0.27	Amphipoda	1.6	0.247	70	1.09312
99	11	24_x1.6_77mm_16.tif	Coris julis	0.388	Bivalvia	1.6	0.247	77	1.57085
1	11	30.1_x2.0_70mm_10.tif	Coris julis	0.429	Gastropoda	2	0.31	70	1.38387
1	11	30_x3.2_70mm_10.tif	Coris julis	0.602	Gastropoda	3.2	0.494	70	1.21862
2	11	30_x3.2_70mm_10.tif	Coris julis	0.217	Gastropoda	3.2	0.494	70	0.439271
3	11	30_x3.2_70mm_10.tif	Coris julis	0.383	Gastropoda	3.2	0.494	70	0.775304
1	11	31_x1.6_70mm_10.tif	Coris julis	0.217	Gastropoda	1.6	0.247	70	0.878543
2	11	31_x1.6_70mm_10.tif	Coris julis	0.263	Gastropoda	1.6	0.247	70	1.06478
3	11	31_x1.6_70mm_10.tif	Coris julis	0.391	Gastropoda	1.6	0.247	70	1.583
1	11	32_x4.0_70mm_10.tif	Coris julis	0.419	Gastropoda	4	0.617	70	0.679092
2	11	32_x4.0_70mm_10.tif	Coris julis	0.292	Gastropoda	4	0.617	70	0.473258
1	11	33_x6.3_70mm_10.tif	Coris julis	0.484	Gastropoda	6.3	0.98	70	0.493878
2	11	33_x6.3_70mm_10.tif	Coris julis	0.527	Gastropoda	6.3	0.98	70	0.537755
1	11	36_x2.5_70mm_10.tif	Coris julis	0.393	Gastropoda	2.5	0.39	70	1.00769
1	11	37_x3.2_70mm_10.tif	Coris julis	0.858	Gastropoda	3.2	0.494	70	1.73684
2	11	37_x3.2_70mm_10.tif	Coris julis	0.525	Gastropoda	3.2	0.494	70	1.06275
3	11	37_x3.2_70mm_10.tif	Coris julis	0.588	Gastropoda	3.2	0.494	70	1.19028
2	11	30.1_x2.0_70mm_10.tif	Coris julis	2.095	Polychaeta	2	0.31	70	6.75806
4	11	31_x1.6_70mm_10.tif	Coris julis	0.757	Polychaeta	1.6	0.247	70	3.06478
2	11	36_x2.5_70mm_10.tif	Coris julis	1.009	Polychaeta	2.5	0.39	70	2.58718
3	11	36_x2.5_70mm_10.tif	Coris julis	0.652	Polychaeta	2.5	0.39	70	1.67179
1	11	34_x8.0_70mm_10.tif	Coris julis	0.547	Unidentified	8	1.247	70	0.438653
1	11	35_x5.0_70mm_10.tif	Coris julis	0.256	Unidentified	5	0.78	70	0.328205
2	11	35_x5.0_70mm_10.tif	Coris julis	0.683	Unidentified	5	0.78	70	0.875641
99	12	24_x1.6_77mm_16.tif	Coris julis	0.282	Bivalvia	1.6	0.247	77	1.1417
1	12	38_x2.0_65mm_12.tif	Coris julis	0.523	Gastropoda	2	0.31	65	1.6871
99	13	24_x1.6_77mm_16.tif	Coris julis	0.315	Bivalvia	1.6	0.247	77	1.2753
1	13	39_x1.25_66mm_11.tif	Coris julis	0.17	Gastropoda	1.25	0.153	66	1.11111
99	14	24_x1.6_77mm_16.tif	Coris julis	0.269	Bivalvia	1.6	0.247	77	1.08907
7	14	40_x2.0_58mm_14.tif	Coris julis	0.087	Foraminifera	2	0.31	58	0.280645
1	14	40_x2.0_58mm_14.tif	Coris julis	0.561	Gastropoda	2	0.31	58	1.80968
2	14	40_x2.0_58mm_14.tif	Coris julis	0.229	Gastropoda	2	0.31	58	0.73871
3	14	40_x2.0_58mm_14.tif	Coris julis	0.193	Gastropoda	2	0.31	58	0.622581
4	14	40_x2.0_58mm_14.tif	Coris julis	0.166	Gastropoda	2	0.31	58	0.535484
5	14	40_x2.0_58mm_14.tif	Coris julis	0.213	Gastropoda	2	0.31	58	0.687097
6	14	40_x2.0_58mm_14.tif	Coris julis	0.167	Gastropoda	2	0.31	58	0.53871
8	14	40_x2.0_58mm_14.tif	Coris julis	0.213	Gastropoda	2	0.31	58	0.687097
9	14	40_x2.0_58mm_14.tif	Coris julis	0.203	Gastropoda	2	0.31	58	0.654839
10	14	40_x2.0_58mm_14.tif	Coris julis	0.288	Gastropoda	2	0.31	58	0.929032
11	14	40_x2.0_58mm_14.tif	Coris julis	0.218	Gastropoda	2	0.31	58	0.703226
12	14	40_x2.0_58mm_14.tif	Coris julis	0.195	Gastropoda	2	0.31	58	0.629032
13	14	40_x2.0_58mm_14.tif	Coris julis	0.234	Gastropoda	2	0.31	58	0.754839
14	14	40_x2.0_58mm_14.tif	Coris julis	0.109	Gastropoda	2	0.31	58	0.351613
15	14	40_x2.0_58mm_14.tif	Coris julis	0.27	Gastropoda	2	0.31	58	0.870968
1	14	41_x3.2_58mm_14.tif	Coris julis	0.363	Gastropoda	3.2	0.494	58	0.734818
2	14	41_x3.2_58mm_14.tif	Coris julis	0.255	Gastropoda	3.2	0.494	58	0.516194
3	14	41_x3.2_58mm_14.tif	Coris julis	0.189	Gastropoda	3.2	0.494	58	0.382591
4	14	41_x3.2_58mm_14.tif	Coris julis	0.225	Gastropoda	3.2	0.494	58	0.455466
5	14	41_x3.2_58mm_14.tif	Coris julis	0.284	Gastropoda	3.2	0.494	58	0.574899
6	14	41_x3.2_58mm_14.tif	Coris julis	0.255	Gastropoda	3.2	0.494	58	0.516194
16	14	40_x2.0_58mm_14.tif	Coris julis	0.221	Harpacticoida	2	0.31	58	0.712903
17	14	40_x2.0_58mm_14.tif	Coris julis	0.199	Harpacticoida	2	0.31	58	0.641935
7	14	41_x3.2_58mm_14.tif	Coris julis	0.373	Harpacticoida	3.2	0.494	58	0.755061
8	14	41_x3.2_58mm_14.tif	Coris julis	0.533	Harpacticoida	3.2	0.494	58	1.07895
1	15	42_x6.3_55mm_13.tif	Coris julis	0.578	Acari	6.3	0.98	55	0.589796
99	15	25_x1.25_77mm_16.tif	Coris julis	0.337	Bivalvia	1.25	0.153	77	2.20261
4	15	43_x3.2_55mm_13.tif	Coris julis	0.381	Bivalvia	3.2	0.494	55	0.771255
1	15	43_x3.2_55mm_13.tif	Coris julis	0.236	Foraminifera	3.2	0.494	55	0.477733
3	15	43_x3.2_55mm_13.tif	Coris julis	0.376	Foraminifera	3.2	0.494	55	0.761134
1	15	45_x8.0_55mm_13.tif	Coris julis	0.477	Gastropoda	8	1.247	55	0.382518
2	15	43_x3.2_55mm_13.tif	Coris julis	0.45	Harpacticoida	3.2	0.494	55	0.910931
1	15	44_x6.3_55mm_13.tif	Coris julis	0.777	Harpacticoida	6.3	0.98	55	0.792857
2	15	44_x6.3_55mm_13.tif	Coris julis	0.709	Harpacticoida	6.3	0.98	55	0.723469
2	15	45_x8.0_55mm_13.tif	Coris julis	0.917	Unidentified	8	1.247	55	0.735365
99	16	25_x1.25_77mm_16.tif	Coris julis	0.325	Bivalvia	1.25	0.153	77	2.12418
1	16	46_x1.6_54mm_15.tif	Coris julis	0.119	Gastropoda	1.6	0.247	54	0.481781
2	16	46_x1.6_54mm_15.tif	Coris julis	0.123	Gastropoda	1.6	0.247	54	0.497976
3	16	46_x1.6_54mm_15.tif	Coris julis	0.151	Gastropoda	1.6	0.247	54	0.611336
4	16	46_x1.6_54mm_15.tif	Coris julis	0.097	Gastropoda	1.6	0.247	54	0.392713
5	16	46_x1.6_54mm_15.tif	Coris julis	0.133	Gastropoda	1.6	0.247	54	0.538462
99	17	25_x1.25_77mm_16.tif	Coris julis	0.297	Bivalvia	1.25	0.153	77	1.94118
1	17	47_x6.3_54mm_15.tif	Coris julis	0.512	Gastropoda	6.3	0.98	54	0.522449
2	17	47_x6.3_54mm_15.tif	Coris julis	0.342	Gastropoda	6.3	0.98	54	0.34898
3	17	47_x6.3_54mm_15.tif	Coris julis	0.333	Gastropoda	6.3	0.98	54	0.339796
4	17	47_x6.3_54mm_15.tif	Coris julis	0.579	Gastropoda	6.3	0.98	54	0.590816
1	18	48_x4.0_54mm_15.tif	Coris julis	0.396	Gastropoda	4	0.617	54	0.641815
2	18	48_x4.0_54mm_15.tif	Coris julis	0.297	Gastropoda	4	0.617	54	0.481361
3	18	48_x4.0_54mm_15.tif	Coris julis	0.286	Gastropoda	4	0.617	54	0.463533
4	18	48_x4.0_54mm_15.tif	Coris julis	0.21	Gastropoda	4	0.617	54	0.340357
5	18	48_x4.0_54mm_15.tif	Coris julis	0.228	Gastropoda	4	0.617	54	0.36953
1	18	49_x5.0_54mm_15.tif	Coris julis	0.347	Gastropoda	5	0.78	54	0.444872
2	18	49_x5.0_54mm_15.tif	Coris julis	0.314	Gastropoda	5	0.78	54	0.402564
3	18	49_x5.0_54mm_15.tif	Coris julis	0.426	Gastropoda	5	0.78	54	0.546154
4	18	49_x5.0_54mm_15.tif	Coris julis	0.616	Gastropoda	5	0.78	54	0.789744
5	18	49_x5.0_54mm_15.tif	Coris julis	0.281	Gastropoda	5	0.78	54	0.360256
1	19	50_x3.2_54mm_15.tif	Coris julis	0.528	Gastropoda	3.2	0.494	54	1.06883
2	19	50_x3.2_54mm_15.tif	Coris julis	0.639	Gastropoda	3.2	0.494	54	1.29352
3	19	50_x3.2_54mm_15.tif	Coris julis	0.261	Gastropoda	3.2	0.494	54	0.52834
4	19	50_x3.2_54mm_15.tif	Coris julis	0.262	Gastropoda	3.2	0.494	54	0.530364
5	19	50_x3.2_54mm_15.tif	Coris julis	0.247	Gastropoda	3.2	0.494	54	0.5
1	19	51_x5.0_54mm_15.tif	Coris julis	0.34	Gastropoda	5	0.78	54	0.435897
2	19	51_x5.0_54mm_15.tif	Coris julis	0.222	Gastropoda	5	0.78	54	0.284615
3	19	51_x5.0_54mm_15.tif	Coris julis	0.24	Gastropoda	5	0.78	54	0.307692
4	19	51_x5.0_54mm_15.tif	Coris julis	0.215	Gastropoda	5	0.78	54	0.275641
1	19	52_x6.3_54mm_16.tif	Coris julis	0.424	Gastropoda	6.3	0.98	54	0.432653
2	19	52_x6.3_54mm_16.tif	Coris julis	0.316	Gastropoda	6.3	0.98	54	0.322449
3	19	52_x6.3_54mm_16.tif	Coris julis	0.38	Gastropoda	6.3	0.98	54	0.387755
1	19	53_x4.0_54mm_16.tif	Coris julis	0.324	Gastropoda	4	0.617	54	0.525122
2	19	53_x4.0_54mm_16.tif	Coris julis	0.137	Gastropoda	4	0.617	54	0.222042
3	19	53_x4.0_54mm_16.tif	Coris julis	0.494	Gastropoda	4	0.617	54	0.800648
4	19	53_x4.0_54mm_16.tif	Coris julis	0.168	Gastropoda	4	0.617	54	0.272285
5	19	53_x4.0_54mm_16.tif	Coris julis	0.273	Gastropoda	4	0.617	54	0.442464
6	19	53_x4.0_54mm_16.tif	Coris julis	0.238	Gastropoda	4	0.617	54	0.385737
7	19	53_x4.0_54mm_16.tif	Coris julis	0.325	Gastropoda	4	0.617	54	0.526742
1	19	54.5_x3.2_54mm_16.tif	Coris julis	0.205	Gastropoda	3.2	0.494	54	0.41498
2	19	54.5_x3.2_54mm_16.tif	Coris julis	0.265	Gastropoda	3.2	0.494	54	0.536437
3	19	54.5_x3.2_54mm_16.tif	Coris julis	0.231	Gastropoda	3.2	0.494	54	0.467611
4	19	54.5_x3.2_54mm_16.tif	Coris julis	0.228	Gastropoda	3.2	0.494	54	0.461538
5	19	54.5_x3.2_54mm_16.tif	Coris julis	0.193	Gastropoda	3.2	0.494	54	0.390688
6	19	54.5_x3.2_54mm_16.tif	Coris julis	0.355	Gastropoda	3.2	0.494	54	0.718623
7	19	54.5_x3.2_54mm_16.tif	Coris julis	0.184	Gastropoda	3.2	0.494	54	0.37247
8	19	54.5_x3.2_54mm_16.tif	Coris julis	0.223	Gastropoda	3.2	0.494	54	0.451417
9	19	54.5_x3.2_54mm_16.tif	Coris julis	0.212	Gastropoda	3.2	0.494	54	0.42915
7	20	56_x2.0_66mm_17.tif	Coris julis	0.367	Amphipoda	2	0.31	66	1.18387
8	20	56_x2.0_66mm_17.tif	Coris julis	0.361	Amphipoda	2	0.31	66	1.16452
9	20	56_x2.0_66mm_17.tif	Coris julis	0.346	Amphipoda	2	0.31	66	1.11613
6	20	54_x3.2_66mm_17.tif	Coris julis	0.876	Crustacean appendage	3.2	0.494	66	1.77328
1	20	54_x3.2_66mm_17.tif	Coris julis	0.266	Gastropoda	3.2	0.494	66	0.538462
2	20	54_x3.2_66mm_17.tif	Coris julis	0.601	Gastropoda	3.2	0.494	66	1.2166
3	20	54_x3.2_66mm_17.tif	Coris julis	0.329	Gastropoda	3.2	0.494	66	0.665992
4	20	54_x3.2_66mm_17.tif	Coris julis	0.302	Gastropoda	3.2	0.494	66	0.611336
5	20	54_x3.2_66mm_17.tif	Coris julis	0.158	Gastropoda	3.2	0.494	66	0.319838
1	20	55_x3.2_66mm_17.tif	Coris julis	0.381	Gastropoda	3.2	0.494	66	0.771255
2	20	55_x3.2_66mm_17.tif	Coris julis	0.261	Gastropoda	3.2	0.494	66	0.52834
3	20	55_x3.2_66mm_17.tif	Coris julis	0.231	Gastropoda	3.2	0.494	66	0.467611
4	20	55_x3.2_66mm_17.tif	Coris julis	0.264	Gastropoda	3.2	0.494	66	0.534413
1	20	56_x2.0_66mm_17.tif	Coris julis	0.156	Gastropoda	2	0.31	66	0.503226
2	20	56_x2.0_66mm_17.tif	Coris julis	0.134	Gastropoda	2	0.31	66	0.432258
3	20	56_x2.0_66mm_17.tif	Coris julis	0.217	Gastropoda	2	0.31	66	0.7
4	20	56_x2.0_66mm_17.tif	Coris julis	0.209	Gastropoda	2	0.31	66	0.674194
5	20	56_x2.0_66mm_17.tif	Coris julis	0.413	Gastropoda	2	0.31	66	1.33226
6	20	56_x2.0_66mm_17.tif	Coris julis	0.198	Gastropoda	2	0.31	66	0.63871
3	20	57_x2.0_66mm_17.tif	Coris julis	0.102	Gastropoda	2	0.31	66	0.329032
4	20	57_x2.0_66mm_17.tif	Coris julis	0.138	Gastropoda	2	0.31	66	0.445161
5	20	57_x2.0_66mm_17.tif	Coris julis	0.176	Gastropoda	2	0.31	66	0.567742
6	20	55_x3.2_66mm_17.tif	Coris julis	0.247	Harpacticoida	3.2	0.494	66	0.5
6	20	57_x2.0_66mm_17.tif	Coris julis	0.215	Harpacticoida	2	0.31	66	0.693548
5	20	55_x3.2_66mm_17.tif	Coris julis	1.327	Polychaeta	3.2	0.494	66	2.68623
10	20	56_x2.0_66mm_17.tif	Coris julis	1.246	Polychaeta	2	0.31	66	4.01935
1	20	57_x2.0_66mm_17.tif	Coris julis	1.599	Polychaeta	2	0.31	66	5.15806
2	20	57_x2.0_66mm_17.tif	Coris julis	2.39	Polychaeta	2	0.31	66	7.70968
1	21	58_x4.0_50mm_18.tif	Coris julis	0.227	Gastropoda	4	0.617	50	0.367909
2	21	58_x4.0_50mm_18.tif	Coris julis	0.347	Gastropoda	4	0.617	50	0.562399
3	21	58_x4.0_50mm_18.tif	Coris julis	0.14	Gastropoda	4	0.617	50	0.226904
1	22	61_x2.0_79mm_19.tif	Coris julis	0.634	Gastropoda	2	0.31	79	2.04516
2	22	61_x2.0_79mm_19.tif	Coris julis	0.437	Gastropoda	2	0.31	79	1.40968
3	22	61_x2.0_79mm_19.tif	Coris julis	0.428	Gastropoda	2	0.31	79	1.38065
4	22	61_x2.0_79mm_19.tif	Coris julis	0.121	Gastropoda	2	0.31	79	0.390323
5	22	61_x2.0_79mm_19.tif	Coris julis	0.156	Gastropoda	2	0.31	79	0.503226
6	22	61_x2.0_79mm_19.tif	Coris julis	0.128	Gastropoda	2	0.31	79	0.412903
1	22	62_x2.0_79mm_19.tif	Coris julis	0.281	Gastropoda	2	0.31	79	0.906452
2	22	62_x2.0_79mm_19.tif	Coris julis	0.513	Gastropoda	2	0.31	79	1.65484
3	22	62_x2.0_79mm_19.tif	Coris julis	0.19	Gastropoda	2	0.31	79	0.612903
4	22	62_x2.0_79mm_19.tif	Coris julis	0.398	Gastropoda	2	0.31	79	1.28387
5	22	62_x2.0_79mm_19.tif	Coris julis	0.347	Gastropoda	2	0.31	79	1.11935
1	22	63_x1.6_79mm_19.tif	Coris julis	0.34	Gastropoda	1.6	0.247	79	1.37652
2	22	63_x1.6_79mm_19.tif	Coris julis	0.359	Gastropoda	1.6	0.247	79	1.45344
3	22	63_x1.6_79mm_19.tif	Coris julis	0.173	Gastropoda	1.6	0.247	79	0.700405
4	22	63_x1.6_79mm_19.tif	Coris julis	0.177	Gastropoda	1.6	0.247	79	0.716599
5	22	63_x1.6_79mm_19.tif	Coris julis	0.192	Gastropoda	1.6	0.247	79	0.777328
6	22	63_x1.6_79mm_19.tif	Coris julis	0.191	Gastropoda	1.6	0.247	79	0.773279
7	22	63_x1.6_79mm_19.tif	Coris julis	0.169	Gastropoda	1.6	0.247	79	0.684211
8	22	63_x1.6_79mm_19.tif	Coris julis	0.385	Gastropoda	1.6	0.247	79	1.5587
1	22	64_x2.0_79mm_19.tif	Coris julis	0.356	Gastropoda	2	0.31	79	1.14839
2	22	64_x2.0_79mm_19.tif	Coris julis	0.362	Gastropoda	2	0.31	79	1.16774
3	22	64_x2.0_79mm_19.tif	Coris julis	0.433	Gastropoda	2	0.31	79	1.39677
4	22	64_x2.0_79mm_19.tif	Coris julis	0.399	Gastropoda	2	0.31	79	1.2871
5	22	64_x2.0_79mm_19.tif	Coris julis	0.33	Gastropoda	2	0.31	79	1.06452
6	22	64_x2.0_79mm_19.tif	Coris julis	0.638	Gastropoda	2	0.31	79	2.05806
7	22	64_x2.0_79mm_19.tif	Coris julis	0.188	Gastropoda	2	0.31	79	0.606452
8	22	64_x2.0_79mm_19.tif	Coris julis	0.258	Gastropoda	2	0.31	79	0.832258
6	22	62_x2.0_79mm_19.tif	Coris julis	0.276	Harpacticoida	2	0.31	79	0.890323
9	22	64_x2.0_79mm_19.tif	Coris julis	1.127	Polychaeta	2	0.31	79	3.63548
7	22	62_x2.0_79mm_19.tif	Coris julis	0.064	Unidentified	2	0.31	79	0.206452
8	22	62_x2.0_79mm_19.tif	Coris julis	0.067	Unidentified	2	0.31	79	0.216129
3	23	65_x3.2_58mm_20.tif	Coris julis	0.158	Acari	3.2	0.494	58	0.319838
1	23	65_x3.2_58mm_20.tif	Coris julis	0.34	Gastropoda	3.2	0.494	58	0.688259
2	23	65_x3.2_58mm_20.tif	Coris julis	0.238	Gastropoda	3.2	0.494	58	0.481781
4	23	65_x3.2_58mm_20.tif	Coris julis	0.53	Harpacticoida	3.2	0.494	58	1.07287
5	23	65_x3.2_58mm_20.tif	Coris julis	1.852	Polychaeta	3.2	0.494	58	3.74899
1	24	66_x2.5_58mm_20.tif	Coris julis	0.271	Gastropoda	2.5	0.39	58	0.694872
2	24	66_x2.5_58mm_20.tif	Coris julis	0.343	Gastropoda	2.5	0.39	58	0.879487
3	24	66_x2.5_58mm_20.tif	Coris julis	0.189	Gastropoda	2.5	0.39	58	0.484615
4	24	66_x2.5_58mm_20.tif	Coris julis	0.217	Gastropoda	2.5	0.39	58	0.55641
5	24	66_x2.5_58mm_20.tif	Coris julis	0.39	Gastropoda	2.5	0.39	58	1
6	24	66_x2.5_58mm_20.tif	Coris julis	0.202	Gastropoda	2.5	0.39	58	0.517949
7	24	66_x2.5_58mm_20.tif	Coris julis	0.119	Gastropoda	2.5	0.39	58	0.305128
8	24	66_x2.5_58mm_20.tif	Coris julis	0.187	Gastropoda	2.5	0.39	58	0.479487
1	25	67_x2.0_58mm_20.tif	Coris julis	1.211	Polychaeta	2	0.31	58	3.90645
2	25	67_x2.0_58mm_20.tif	Coris julis	1.806	Polychaeta	2	0.31	58	5.82581
3	25	67_x2.0_58mm_20.tif	Coris julis	1.074	Polychaeta	2	0.31	58	3.46452
1	26	68_x2.0_58mm_20.tif	Coris julis	0.282	Foraminifera	2	0.31	58	0.909677
2	26	68_x2.0_58mm_20.tif	Coris julis	0.433	Gastropoda	2	0.31	58	1.39677
3	26	68_x2.0_58mm_20.tif	Coris julis	0.197	Gastropoda	2	0.31	58	0.635484
4	26	68_x2.0_58mm_20.tif	Coris julis	0.197	Gastropoda	2	0.31	58	0.635484
5	26	68_x2.0_58mm_20.tif	Coris julis	0.239	Harpacticoida	2	0.31	58	0.770968
6	26	68_x2.0_58mm_20.tif	Coris julis	0.441	Harpacticoida	2	0.31	58	1.42258
7	26	68_x2.0_58mm_20.tif	Coris julis	0.259	Harpacticoida	2	0.31	58	0.835484
1	27	70_x1.6_51mm_21.tif	Coris julis	0.258	Gastropoda	1.6	0.247	51	1.04453
2	27	70_x1.6_51mm_21.tif	Coris julis	0.25	Gastropoda	1.6	0.247	51	1.01215
3	27	70_x1.6_51mm_21.tif	Coris julis	0.221	Gastropoda	1.6	0.247	51	0.894737
4	27	70_x1.6_51mm_21.tif	Coris julis	0.212	Gastropoda	1.6	0.247	51	0.8583
5	27	70_x1.6_51mm_21.tif	Coris julis	0.228	Gastropoda	1.6	0.247	51	0.923077
6	27	70_x1.6_51mm_21.tif	Coris julis	0.217	Gastropoda	1.6	0.247	51	0.878543
1	27	71_x3.2_51mm_21.tif	Coris julis	0.426	Gastropoda	3.2	0.494	51	0.862348
2	27	71_x3.2_51mm_21.tif	Coris julis	0.565	Gastropoda	3.2	0.494	51	1.14372
9	27	70_x1.6_51mm_21.tif	Coris julis	0.301	Harpacticoida	1.6	0.247	51	1.21862
10	27	70_x1.6_51mm_21.tif	Coris julis	0.228	Harpacticoida	1.6	0.247	51	0.923077
11	27	70_x1.6_51mm_21.tif	Coris julis	0.317	Harpacticoida	1.6	0.247	51	1.2834
1	27	71_x3.2_51mm_21.tif	Coris julis	0.426	Harpacticoida	3.2	0.494	51	0.862348
2	27	71_x3.2_51mm_21.tif	Coris julis	0.565	Harpacticoida	3.2	0.494	51	1.14372
3	27	71_x3.2_51mm_21.tif	Coris julis	0.333	Harpacticoida	3.2	0.494	51	0.674089
4	27	71_x3.2_51mm_21.tif	Coris julis	0.447	Harpacticoida	3.2	0.494	51	0.904858
5	27	71_x3.2_51mm_21.tif	Coris julis	0.417	Harpacticoida	3.2	0.494	51	0.84413
6	27	71_x3.2_51mm_21.tif	Coris julis	0.305	Harpacticoida	3.2	0.494	51	0.617409
7	27	71_x3.2_51mm_21.tif	Coris julis	0.298	Harpacticoida	3.2	0.494	51	0.603239
8	27	71_x3.2_51mm_21.tif	Coris julis	0.573	Harpacticoida	3.2	0.494	51	1.15992
7	27	70_x1.6_51mm_21.tif	Coris julis	0.761	Polychaeta	1.6	0.247	51	3.08097
8	27	70_x1.6_51mm_21.tif	Coris julis	0.652	Polychaeta	1.6	0.247	51	2.63968
1	28	72_x2.0_48mm_22.tif	Coris julis	0.326	Bivalvia	2	0.31	48	1.05161
2	28	72_x2.0_48mm_22.tif	Coris julis	0.176	Gastropoda	2	0.31	48	0.567742
3	28	72_x2.0_48mm_22.tif	Coris julis	0.306	Gastropoda	2	0.31	48	0.987097
4	28	72_x2.0_48mm_22.tif	Coris julis	0.186	Gastropoda	2	0.31	48	0.6
5	28	72_x2.0_48mm_22.tif	Coris julis	0.09	Gastropoda	2	0.31	48	0.290323
6	28	72_x2.0_48mm_22.tif	Coris julis	0.14	Gastropoda	2	0.31	48	0.451613
7	28	72_x2.0_48mm_22.tif	Coris julis	0.145	Gastropoda	2	0.31	48	0.467742
8	28	72_x2.0_48mm_22.tif	Coris julis	0.19	Gastropoda	2	0.31	48	0.612903
9	28	72_x2.0_48mm_22.tif	Coris julis	0.223	Gastropoda	2	0.31	48	0.719355
10	28	72_x2.0_48mm_22.tif	Coris julis	0.115	Gastropoda	2	0.31	48	0.370968
11	28	72_x2.0_48mm_22.tif	Coris julis	0.368	Harpacticoida	2	0.31	48	1.1871
12	28	72_x2.0_48mm_22.tif	Coris julis	0.159	Harpacticoida	2	0.31	48	0.512903
13	28	72_x2.0_48mm_22.tif	Coris julis	0.215	Harpacticoida	2	0.31	48	0.693548
14	28	72_x2.0_48mm_22.tif	Coris julis	0.211	Harpacticoida	2	0.31	48	0.680645
15	28	72_x2.0_48mm_22.tif	Coris julis	0.32	Harpacticoida	2	0.31	48	1.03226
20	29	76_x2.0_56mm_23.tif	Coris julis	0.172	Acari	2	0.31	56	0.554839
7	29	77_x2.5_56mm_23.tif	Coris julis	0.425	Amphipoda	2.5	0.39	56	1.08974
8	29	74_x1.6_56mm_23.tif	Coris julis	0.188	Bivalvia	1.6	0.247	56	0.761134
1	29	77_x2.5_56mm_23.tif	Coris julis	0.181	Foraminifera	2.5	0.39	56	0.464103
3	29	73_x3.2_56mm_23.tif	Coris julis	0.197	Gastropoda	3.2	0.494	56	0.398785
1	29	74_x1.6_56mm_23.tif	Coris julis	0.182	Gastropoda	1.6	0.247	56	0.736842
2	29	74_x1.6_56mm_23.tif	Coris julis	0.107	Gastropoda	1.6	0.247	56	0.433198
3	29	74_x1.6_56mm_23.tif	Coris julis	0.152	Gastropoda	1.6	0.247	56	0.615385
1	29	75_x3.2_56mm_23.tif	Coris julis	0.412	Gastropoda	3.2	0.494	56	0.834008
2	29	75_x3.2_56mm_23.tif	Coris julis	0.239	Gastropoda	3.2	0.494	56	0.483806
3	29	75_x3.2_56mm_23.tif	Coris julis	0.179	Gastropoda	3.2	0.494	56	0.362348
4	29	75_x3.2_56mm_23.tif	Coris julis	0.371	Gastropoda	3.2	0.494	56	0.751012
5	29	75_x3.2_56mm_23.tif	Coris julis	0.21	Gastropoda	3.2	0.494	56	0.425101
6	29	75_x3.2_56mm_23.tif	Coris julis	0.185	Gastropoda	3.2	0.494	56	0.374494
7	29	75_x3.2_56mm_23.tif	Coris julis	0.313	Gastropoda	3.2	0.494	56	0.633603
1	29	76_x2.0_56mm_23.tif	Coris julis	0.278	Gastropoda	2	0.31	56	0.896774
2	29	76_x2.0_56mm_23.tif	Coris julis	0.137	Gastropoda	2	0.31	56	0.441935
3	29	76_x2.0_56mm_23.tif	Coris julis	0.203	Gastropoda	2	0.31	56	0.654839
4	29	76_x2.0_56mm_23.tif	Coris julis	0.2	Gastropoda	2	0.31	56	0.645161
5	29	76_x2.0_56mm_23.tif	Coris julis	0.224	Gastropoda	2	0.31	56	0.722581
6	29	76_x2.0_56mm_23.tif	Coris julis	0.171	Gastropoda	2	0.31	56	0.551613
7	29	76_x2.0_56mm_23.tif	Coris julis	0.171	Gastropoda	2	0.31	56	0.551613
8	29	76_x2.0_56mm_23.tif	Coris julis	0.249	Gastropoda	2	0.31	56	0.803226
9	29	76_x2.0_56mm_23.tif	Coris julis	0.193	Gastropoda	2	0.31	56	0.622581
10	29	76_x2.0_56mm_23.tif	Coris julis	0.087	Gastropoda	2	0.31	56	0.280645
11	29	76_x2.0_56mm_23.tif	Coris julis	0.182	Gastropoda	2	0.31	56	0.587097
12	29	76_x2.0_56mm_23.tif	Coris julis	0.254	Gastropoda	2	0.31	56	0.819355
13	29	76_x2.0_56mm_23.tif	Coris julis	0.131	Gastropoda	2	0.31	56	0.422581
14	29	76_x2.0_56mm_23.tif	Coris julis	0.163	Gastropoda	2	0.31	56	0.525806
17	29	76_x2.0_56mm_23.tif	Coris julis	0.456	Gastropoda	2	0.31	56	1.47097
18	29	76_x2.0_56mm_23.tif	Coris julis	0.271	Gastropoda	2	0.31	56	0.874194
2	29	77_x2.5_56mm_23.tif	Coris julis	0.169	Gastropoda	2.5	0.39	56	0.433333
3	29	77_x2.5_56mm_23.tif	Coris julis	0.178	Gastropoda	2.5	0.39	56	0.45641
4	29	77_x2.5_56mm_23.tif	Coris julis	0.238	Gastropoda	2.5	0.39	56	0.610256
5	29	77_x2.5_56mm_23.tif	Coris julis	0.193	Gastropoda	2.5	0.39	56	0.494872
6	29	77_x2.5_56mm_23.tif	Coris julis	0.172	Gastropoda	2.5	0.39	56	0.441026
1	29	73_x3.2_56mm_23.tif	Coris julis	0.574	Harpacticoida	3.2	0.494	56	1.16194
2	29	73_x3.2_56mm_23.tif	Coris julis	0.33	Harpacticoida	3.2	0.494	56	0.668016
4	29	74_x1.6_56mm_23.tif	Coris julis	0.232	Harpacticoida	1.6	0.247	56	0.939271
5	29	74_x1.6_56mm_23.tif	Coris julis	0.214	Harpacticoida	1.6	0.247	56	0.866397
6	29	74_x1.6_56mm_23.tif	Coris julis	0.322	Harpacticoida	1.6	0.247	56	1.30364
7	29	74_x1.6_56mm_23.tif	Coris julis	0.39	Harpacticoida	1.6	0.247	56	1.57895
8	29	75_x3.2_56mm_23.tif	Coris julis	0.348	Harpacticoida	3.2	0.494	56	0.704453
9	29	75_x3.2_56mm_23.tif	Coris julis	0.317	Harpacticoida	3.2	0.494	56	0.6417
10	29	75_x3.2_56mm_23.tif	Coris julis	0.379	Harpacticoida	3.2	0.494	56	0.767206
11	29	75_x3.2_56mm_23.tif	Coris julis	0.324	Harpacticoida	3.2	0.494	56	0.65587
12	29	75_x3.2_56mm_23.tif	Coris julis	0.249	Harpacticoida	3.2	0.494	56	0.504049
13	29	75_x3.2_56mm_23.tif	Coris julis	0.267	Harpacticoida	3.2	0.494	56	0.540486
15	29	76_x2.0_56mm_23.tif	Coris julis	0.168	Harpacticoida	2	0.31	56	0.541935
16	29	76_x2.0_56mm_23.tif	Coris julis	0.345	Harpacticoida	2	0.31	56	1.1129
8	29	77_x2.5_56mm_23.tif	Coris julis	0.488	Harpacticoida	2.5	0.39	56	1.25128
9	29	77_x2.5_56mm_23.tif	Coris julis	0.292	Harpacticoida	2.5	0.39	56	0.748718
10	29	77_x2.5_56mm_23.tif	Coris julis	0.376	Harpacticoida	2.5	0.39	56	0.964103
9	29	74_x1.6_56mm_23.tif	Coris julis	0.363	Polychaeta	1.6	0.247	56	1.46964
10	29	74_x1.6_56mm_23.tif	Coris julis	1.636	Polychaeta	1.6	0.247	56	6.62348
19	29	76_x2.0_56mm_23.tif	Coris julis	1.381	Polychaeta	2	0.31	56	4.45484
1	30	78_x1.6_63mm_24.tif	Coris julis	0.32	Gastropoda	1.6	0.247	63	1.29555
2	30	78_x1.6_63mm_24.tif	Coris julis	0.189	Gastropoda	1.6	0.247	63	0.765182
3	30	78_x1.6_63mm_24.tif	Coris julis	0.136	Gastropoda	1.6	0.247	63	0.550607
4	30	78_x1.6_63mm_24.tif	Coris julis	0.21	Gastropoda	1.6	0.247	63	0.850202
5	30	78_x1.6_63mm_24.tif	Coris julis	0.106	Gastropoda	1.6	0.247	63	0.42915
6	30	78_x1.6_63mm_24.tif	Coris julis	0.188	Gastropoda	1.6	0.247	63	0.761134
7	30	78_x1.6_63mm_24.tif	Coris julis	0.144	Gastropoda	1.6	0.247	63	0.582996
8	30	78_x1.6_63mm_24.tif	Coris julis	0.118	Gastropoda	1.6	0.247	63	0.477733
9	30	78_x1.6_63mm_24.tif	Coris julis	0.185	Gastropoda	1.6	0.247	63	0.748988
10	30	78_x1.6_63mm_24.tif	Coris julis	0.113	Gastropoda	1.6	0.247	63	0.45749
11	30	78_x1.6_63mm_24.tif	Coris julis	0.159	Gastropoda	1.6	0.247	63	0.643725
12	30	78_x1.6_63mm_24.tif	Coris julis	0.098	Gastropoda	1.6	0.247	63	0.396761
13	30	78_x1.6_63mm_24.tif	Coris julis	0.153	Gastropoda	1.6	0.247	63	0.619433
14	30	78_x1.6_63mm_24.tif	Coris julis	0.173	Gastropoda	1.6	0.247	63	0.700405
15	30	78_x1.6_63mm_24.tif	Coris julis	0.139	Gastropoda	1.6	0.247	63	0.562753
16	30	78_x1.6_63mm_24.tif	Coris julis	0.416	Gastropoda	1.6	0.247	63	1.68421
18	30	78_x1.6_63mm_24.tif	Coris julis	1.174	Polychaeta	1.6	0.247	63	4.75304
17	30	78_x1.6_63mm_24.tif	Coris julis	0.35	Tanaidacea	1.6	0.247	63	1.417
9	31	79_x2.0_54mm_25.tif	Coris julis	0.251	Foraminifera	2	0.31	54	0.809677
1	31	79_x2.0_54mm_25.tif	Coris julis	0.116	Gastropoda	2	0.31	54	0.374194
2	31	79_x2.0_54mm_25.tif	Coris julis	0.196	Gastropoda	2	0.31	54	0.632258
3	31	79_x2.0_54mm_25.tif	Coris julis	0.109	Gastropoda	2	0.31	54	0.351613
4	31	79_x2.0_54mm_25.tif	Coris julis	0.233	Gastropoda	2	0.31	54	0.751613
5	31	79_x2.0_54mm_25.tif	Coris julis	0.12	Gastropoda	2	0.31	54	0.387097
6	31	79_x2.0_54mm_25.tif	Coris julis	0.304	Gastropoda	2	0.31	54	0.980645
7	31	79_x2.0_54mm_25.tif	Coris julis	0.168	Gastropoda	2	0.31	54	0.541935
8	31	79_x2.0_54mm_25.tif	Coris julis	0.142	Gastropoda	2	0.31	54	0.458065
10	31	79_x2.0_54mm_25.tif	Coris julis	0.144	Gastropoda	2	0.31	54	0.464516
11	31	79_x2.0_54mm_25.tif	Coris julis	0.166	Gastropoda	2	0.31	54	0.535484
12	31	79_x2.0_54mm_25.tif	Coris julis	0.174	Gastropoda	2	0.31	54	0.56129
13	31	79_x2.0_54mm_25.tif	Coris julis	0.465	Gastropoda	2	0.31	54	1.5
14	31	79_x2.0_54mm_25.tif	Coris julis	0.245	Gastropoda	2	0.31	54	0.790323
15	31	79_x2.0_54mm_25.tif	Coris julis	0.14	Gastropoda	2	0.31	54	0.451613
16	31	79_x2.0_54mm_25.tif	Coris julis	0.381	Gastropoda	2	0.31	54	1.22903
1	31	80_x2.5_54mm_25.tif	Coris julis	0.388	Gastropoda	2.5	0.39	54	0.994872
2	31	80_x2.5_54mm_25.tif	Coris julis	0.274	Gastropoda	2.5	0.39	54	0.702564
3	31	80_x2.5_54mm_25.tif	Coris julis	0.372	Gastropoda	2.5	0.39	54	0.953846
4	31	80_x2.5_54mm_25.tif	Coris julis	0.245	Gastropoda	2.5	0.39	54	0.628205
5	31	80_x2.5_54mm_25.tif	Coris julis	0.284	Gastropoda	2.5	0.39	54	0.728205
6	31	80_x2.5_54mm_25.tif	Coris julis	0.18	Gastropoda	2.5	0.39	54	0.461538
7	31	80_x2.5_54mm_25.tif	Coris julis	0.207	Gastropoda	2.5	0.39	54	0.530769
8	31	80_x2.5_54mm_25.tif	Coris julis	0.155	Gastropoda	2.5	0.39	54	0.397436
9	31	80_x2.5_54mm_25.tif	Coris julis	0.103	Gastropoda	2.5	0.39	54	0.264103
10	31	80_x2.5_54mm_25.tif	Coris julis	0.36	Gastropoda	2.5	0.39	54	0.923077
11	31	80_x2.5_54mm_25.tif	Coris julis	0.159	Gastropoda	2.5	0.39	54	0.407692
12	31	80_x2.5_54mm_25.tif	Coris julis	0.15	Gastropoda	2.5	0.39	54	0.384615
13	31	80_x2.5_54mm_25.tif	Coris julis	0.193	Gastropoda	2.5	0.39	54	0.494872
17	31	79_x2.0_54mm_25.tif	Coris julis	0.325	Harpacticoida	2	0.31	54	1.04839
18	31	79_x2.0_54mm_25.tif	Coris julis	0.311	Harpacticoida	2	0.31	54	1.00323
19	31	79_x2.0_54mm_25.tif	Coris julis	0.363	Harpacticoida	2	0.31	54	1.17097
20	31	79_x2.0_54mm_25.tif	Coris julis	0.078	Unidentified	2	0.31	54	0.251613
1	31	8_x3.2_71mm_2.tif	Coris julis	0.59	Unidentified	3.2	0.494	71	1.19433
14	31	80_x2.5_54mm_25.tif	Coris julis	0.212	Unidentified	2.5	0.39	54	0.54359
1	32	81_1.6_60mm_26.tif	Coris julis	0.131	Gastropoda	1.6	0.247	60	0.530364
2	32	81_1.6_60mm_26.tif	Coris julis	0.244	Gastropoda	1.6	0.247	60	0.987854
3	32	81_1.6_60mm_26.tif	Coris julis	0.15	Gastropoda	1.6	0.247	60	0.607287
4	32	81_1.6_60mm_26.tif	Coris julis	0.14	Gastropoda	1.6	0.247	60	0.566802
5	32	81_1.6_60mm_26.tif	Coris julis	0.222	Gastropoda	1.6	0.247	60	0.898785
6	32	81_1.6_60mm_26.tif	Coris julis	0.153	Gastropoda	1.6	0.247	60	0.619433
7	32	81_1.6_60mm_26.tif	Coris julis	0.224	Gastropoda	1.6	0.247	60	0.906883
8	32	81_1.6_60mm_26.tif	Coris julis	0.154	Gastropoda	1.6	0.247	60	0.623482
9	32	81_1.6_60mm_26.tif	Coris julis	0.155	Gastropoda	1.6	0.247	60	0.62753
10	32	81_1.6_60mm_26.tif	Coris julis	0.105	Gastropoda	1.6	0.247	60	0.425101
11	32	81_1.6_60mm_26.tif	Coris julis	0.132	Gastropoda	1.6	0.247	60	0.534413
12	32	81_1.6_60mm_26.tif	Coris julis	0.159	Gastropoda	1.6	0.247	60	0.643725
13	32	81_1.6_60mm_26.tif	Coris julis	0.117	Gastropoda	1.6	0.247	60	0.473684
14	32	81_1.6_60mm_26.tif	Coris julis	0.138	Gastropoda	1.6	0.247	60	0.558704
15	32	81_1.6_60mm_26.tif	Coris julis	0.137	Gastropoda	1.6	0.247	60	0.554656
16	32	81_1.6_60mm_26.tif	Coris julis	0.282	Gastropoda	1.6	0.247	60	1.1417
17	32	81_1.6_60mm_26.tif	Coris julis	0.127	Gastropoda	1.6	0.247	60	0.51417
18	32	81_1.6_60mm_26.tif	Coris julis	0.139	Gastropoda	1.6	0.247	60	0.562753
19	32	81_1.6_60mm_26.tif	Coris julis	0.139	Gastropoda	1.6	0.247	60	0.562753
20	32	81_1.6_60mm_26.tif	Coris julis	0.177	Gastropoda	1.6	0.247	60	0.716599
21	32	81_1.6_60mm_26.tif	Coris julis	0.147	Gastropoda	1.6	0.247	60	0.595142
22	32	81_1.6_60mm_26.tif	Coris julis	0.145	Gastropoda	1.6	0.247	60	0.587045
1	32	82_x1.6_60mm_26.tif	Coris julis	0.895	Unidentified	1.6	0.247	60	3.62348
1	33	83_x3.2_46mm_27.tif	Coris julis	0.377	Gastropoda	3.2	0.494	46	0.763158
2	33	83_x3.2_46mm_27.tif	Coris julis	0.217	Gastropoda	3.2	0.494	46	0.439271
3	33	83_x3.2_46mm_27.tif	Coris julis	0.26	Gastropoda	3.2	0.494	46	0.526316
4	33	83_x3.2_46mm_27.tif	Coris julis	0.443	Gastropoda	3.2	0.494	46	0.896761
5	33	83_x3.2_46mm_27.tif	Coris julis	0.295	Gastropoda	3.2	0.494	46	0.597166
6	33	83_x3.2_46mm_27.tif	Coris julis	0.258	Gastropoda	3.2	0.494	46	0.522267
7	33	83_x3.2_46mm_27.tif	Coris julis	0.233	Gastropoda	3.2	0.494	46	0.47166
8	33	83_x3.2_46mm_27.tif	Coris julis	0.275	Harpacticoida	3.2	0.494	46	0.55668
9	33	83_x3.2_46mm_27.tif	Coris julis	0.385	Harpacticoida	3.2	0.494	46	0.779352
1	34	84_x2.5_53mm_28.tif	Coris julis	0.427	Gastropoda	2.5	0.39	53	1.09487
2	34	84_x2.5_53mm_28.tif	Coris julis	0.304	Gastropoda	2.5	0.39	53	0.779487
3	34	84_x2.5_53mm_28.tif	Coris julis	0.173	Gastropoda	2.5	0.39	53	0.44359
4	34	84_x2.5_53mm_28.tif	Coris julis	0.25	Gastropoda	2.5	0.39	53	0.641026
5	34	84_x2.5_53mm_28.tif	Coris julis	0.276	Gastropoda	2.5	0.39	53	0.707692
6	34	84_x2.5_53mm_28.tif	Coris julis	0.258	Gastropoda	2.5	0.39	53	0.661538
7	34	84_x2.5_53mm_28.tif	Coris julis	0.304	Gastropoda	2.5	0.39	53	0.779487
8	34	84_x2.5_53mm_28.tif	Coris julis	0.167	Gastropoda	2.5	0.39	53	0.428205
1	35	2_x3.2_34mm_1.tif	Coris julis	0.321	Gastropoda	3.2	0.494	34	0.649798
2	35	2_x3.2_34mm_1.tif	Coris julis	0.313	Gastropoda	3.2	0.494	34	0.633603
1	35	1_x3.2_34mm_1.tif	Coris julis	0.323	Harpacticoida	3.2	0.494	34	0.653846
1	35	3_x3.2_32mm_2.tif	Coris julis	0.315	Harpacticoida	3.2	0.494	32	0.637652
2	35	3_x3.2_32mm_2.tif	Coris julis	0.3	Harpacticoida	3.2	0.494	32	0.607287
3	35	3_x3.2_32mm_2.tif	Coris julis	0.273	Harpacticoida	3.2	0.494	32	0.552632
4	35	3_x3.2_32mm_2.tif	Coris julis	0.295	Harpacticoida	3.2	0.494	32	0.597166
5	35	3_x3.2_32mm_2.tif	Coris julis	0.246	Harpacticoida	3.2	0.494	32	0.497976
6	35	3_x3.2_32mm_2.tif	Coris julis	0.239	Harpacticoida	3.2	0.494	32	0.483806
7	35	3_x3.2_32mm_2.tif	Coris julis	0.136	Harpacticoida	3.2	0.494	32	0.275304
1	36	5_x6.3_42mm_3.tif	Coris julis	0.828	Crustacean appendage	6.3	0.98	42	0.844898
2	36	5_x6.3_42mm_3.tif	Coris julis	1.015	Crustacean appendage	6.3	0.98	42	1.03571
3	36	4_x2.0_42mm_3.tif	Coris julis	0.175	Foraminifera	2	0.31	42	0.564516
1	36	4_x2.0_42mm_3.tif	Coris julis	0.533	Gastropoda	2	0.31	42	1.71935
2	36	4_x2.0_42mm_3.tif	Coris julis	0.344	Gastropoda	2	0.31	42	1.10968
4	36	4_x2.0_42mm_3.tif	Coris julis	0.176	Gastropoda	2	0.31	42	0.567742
1	36	7_x8.0_42mm_3.tif	Coris julis	0.351	Gastropoda	8	1.247	42	0.281476
1	36	6_x2.5_42mm_3.tif	Coris julis	1.36	Polychaeta	2.5	0.39	42	3.48718
2	36	6_x2.5_42mm_3.tif	Coris julis	0.958	Polychaeta	2.5	0.39	42	2.45641
3	36	6_x2.5_42mm_3.tif	Coris julis	1.569	Polychaeta	2.5	0.39	42	4.02308
1	37	9_x2.0_37mm_4.tif	Coris julis	0.884	Crustacean appendage	2	0.31	37	2.85161
2	37	9_x2.0_37mm_4.tif	Coris julis	1.085	Crustacean appendage	2	0.31	37	3.5
1	37	8_x3.2_37mm_4.tif	Coris julis	0.364	Harpacticoida	3.2	0.494	37	0.736842
1	38	11_x2.0_36mm_5.tif	Coris julis	0.083	Foraminifera	2	0.31	36	0.267742
1	38	12_x5.0_36mm_5.tif	Coris julis	0.167	Foraminifera	5	0.78	36	0.214103
1	38	10_x2.5_36mm_5.tif	Coris julis	0.232	Harpacticoida	2.5	0.39	36	0.594872
2	38	10_x2.5_36mm_5.tif	Coris julis	0.206	Harpacticoida	2.5	0.39	36	0.528205
3	38	10_x2.5_36mm_5.tif	Coris julis	0.24	Harpacticoida	2.5	0.39	36	0.615385
4	38	10_x2.5_36mm_5.tif	Coris julis	0.438	Harpacticoida	2.5	0.39	36	1.12308
5	38	10_x2.5_36mm_5.tif	Coris julis	0.469	Harpacticoida	2.5	0.39	36	1.20256
1	39	13_x2.5_32mm_6.tif	Coris julis	0.158	Harpacticoida	2.5	0.39	32	0.405128
2	39	13_x2.5_32mm_6.tif	Coris julis	0.146	Harpacticoida	2.5	0.39	32	0.374359
3	39	13_x2.5_32mm_6.tif	Coris julis	0.34	Harpacticoida	2.5	0.39	32	0.871795
4	39	13_x2.5_32mm_6.tif	Coris julis	0.279	Harpacticoida	2.5	0.39	32	0.715385
5	39	13_x2.5_32mm_6.tif	Coris julis	0.224	Harpacticoida	2.5	0.39	32	0.574359
1	40	14_x5.0_32mm_6.tif	Coris julis	0.179	Foraminifera	5	0.78	32	0.229487
6	40	13_x2.5_32mm_6.tif	Coris julis	0.205	Harpacticoida	2.5	0.39	32	0.525641
2	40	14_x5.0_32mm_6.tif	Coris julis	0.343	Harpacticoida	5	0.78	32	0.439744
1	40	15_x5.0_32mm_6.tif	Coris julis	0.306	Harpacticoida	5	0.78	32	0.392308
2	40	15_x5.0_32mm_6.tif	Coris julis	0.358	Harpacticoida	5	0.78	32	0.458974
3	40	15_x5.0_32mm_6.tif	Coris julis	0.324	Unidentified	5	0.78	32	0.415385
13	41	17_x2.5_26mm_7.tif	Coris julis	0.395	Amphipoda	2.5	0.39	26	1.01282
19	41	17_x2.5_26mm_7.tif	Coris julis	0.48	Amphipoda	2.5	0.39	26	1.23077
20	41	17_x2.5_26mm_7.tif	Coris julis	0.129	Gastropoda	2.5	0.39	26	0.330769
21	41	17_x2.5_26mm_7.tif	Coris julis	0.194	Gastropoda	2.5	0.39	26	0.497436
1	41	16_x2.5_26mm_7.tif	Coris julis	0.34	Harpacticoida	2.5	0.39	26	0.871795
2	41	16_x2.5_26mm_7.tif	Coris julis	0.18	Harpacticoida	2.5	0.39	26	0.461538
3	41	16_x2.5_26mm_7.tif	Coris julis	0.24	Harpacticoida	2.5	0.39	26	0.615385
4	41	16_x2.5_26mm_7.tif	Coris julis	0.364	Harpacticoida	2.5	0.39	26	0.933333
5	41	16_x2.5_26mm_7.tif	Coris julis	0.188	Harpacticoida	2.5	0.39	26	0.482051
6	41	16_x2.5_26mm_7.tif	Coris julis	0.222	Harpacticoida	2.5	0.39	26	0.569231
7	41	16_x2.5_26mm_7.tif	Coris julis	0.252	Harpacticoida	2.5	0.39	26	0.646154
8	41	16_x2.5_26mm_7.tif	Coris julis	0.285	Harpacticoida	2.5	0.39	26	0.730769
9	41	16_x2.5_26mm_7.tif	Coris julis	0.265	Harpacticoida	2.5	0.39	26	0.679487
10	41	16_x2.5_26mm_7.tif	Coris julis	0.243	Harpacticoida	2.5	0.39	26	0.623077
11	41	16_x2.5_26mm_7.tif	Coris julis	0.158	Harpacticoida	2.5	0.39	26	0.405128
12	41	16_x2.5_26mm_7.tif	Coris julis	0.25	Harpacticoida	2.5	0.39	26	0.641026
13	41	16_x2.5_26mm_7.tif	Coris julis	0.177	Harpacticoida	2.5	0.39	26	0.453846
14	41	16_x2.5_26mm_7.tif	Coris julis	0.173	Harpacticoida	2.5	0.39	26	0.44359
1	41	17_x2.5_26mm_7.tif	Coris julis	0.245	Harpacticoida	2.5	0.39	26	0.628205
2	41	17_x2.5_26mm_7.tif	Coris julis	0.145	Harpacticoida	2.5	0.39	26	0.371795
3	41	17_x2.5_26mm_7.tif	Coris julis	0.116	Harpacticoida	2.5	0.39	26	0.297436
4	41	17_x2.5_26mm_7.tif	Coris julis	0.293	Harpacticoida	2.5	0.39	26	0.751282
5	41	17_x2.5_26mm_7.tif	Coris julis	0.108	Harpacticoida	2.5	0.39	26	0.276923
6	41	17_x2.5_26mm_7.tif	Coris julis	0.211	Harpacticoida	2.5	0.39	26	0.541026
7	41	17_x2.5_26mm_7.tif	Coris julis	0.195	Harpacticoida	2.5	0.39	26	0.5
8	41	17_x2.5_26mm_7.tif	Coris julis	0.191	Harpacticoida	2.5	0.39	26	0.489744
9	41	17_x2.5_26mm_7.tif	Coris julis	0.198	Harpacticoida	2.5	0.39	26	0.507692
10	41	17_x2.5_26mm_7.tif	Coris julis	0.149	Harpacticoida	2.5	0.39	26	0.382051
11	41	17_x2.5_26mm_7.tif	Coris julis	0.3	Harpacticoida	2.5	0.39	26	0.769231
12	41	17_x2.5_26mm_7.tif	Coris julis	0.221	Harpacticoida	2.5	0.39	26	0.566667
14	41	17_x2.5_26mm_7.tif	Coris julis	0.4	Harpacticoida	2.5	0.39	26	1.02564
15	41	17_x2.5_26mm_7.tif	Coris julis	0.327	Harpacticoida	2.5	0.39	26	0.838462
16	41	17_x2.5_26mm_7.tif	Coris julis	0.225	Harpacticoida	2.5	0.39	26	0.576923
17	41	17_x2.5_26mm_7.tif	Coris julis	0.263	Harpacticoida	2.5	0.39	26	0.674359
18	41	17_x2.5_26mm_7.tif	Coris julis	0.441	Harpacticoida	2.5	0.39	26	1.13077
5	42	19_x4.0_27mm_8.tif	Coris julis	0.328	Acari	4	0.617	27	0.531605
6	42	19_x4.0_27mm_8.tif	Coris julis	0.138	Gastropoda	4	0.617	27	0.223663
1	42	18_x3.2_27mm_8.tif	Coris julis	0.324	Harpacticoida	3.2	0.494	27	0.65587
2	42	18_x3.2_27mm_8.tif	Coris julis	0.22	Harpacticoida	3.2	0.494	27	0.445344
3	42	18_x3.2_27mm_8.tif	Coris julis	0.251	Harpacticoida	3.2	0.494	27	0.508097
4	42	18_x3.2_27mm_8.tif	Coris julis	0.373	Harpacticoida	3.2	0.494	27	0.755061
5	42	18_x3.2_27mm_8.tif	Coris julis	0.279	Harpacticoida	3.2	0.494	27	0.564777
1	42	19_x4.0_27mm_8.tif	Coris julis	0.294	Harpacticoida	4	0.617	27	0.476499
2	42	19_x4.0_27mm_8.tif	Coris julis	0.395	Harpacticoida	4	0.617	27	0.640194
3	42	19_x4.0_27mm_8.tif	Coris julis	0.366	Harpacticoida	4	0.617	27	0.593193
4	42	19_x4.0_27mm_8.tif	Coris julis	0.175	Ostracoda	4	0.617	27	0.28363
2	43	21_x2.5_35mm_9.tif	Coris julis	0.217	Gastropoda	2.5	0.39	35	0.55641
3	43	21_x2.5_35mm_9.tif	Coris julis	0.274	Gastropoda	2.5	0.39	35	0.702564
1	43	20_x3.2_35mm_9.tif	Coris julis	0.509	Harpacticoida	3.2	0.494	35	1.03036
2	43	20_x3.2_35mm_9.tif	Coris julis	0.317	Harpacticoida	3.2	0.494	35	0.6417
3	43	20_x3.2_35mm_9.tif	Coris julis	0.316	Harpacticoida	3.2	0.494	35	0.639676
4	43	20_x3.2_35mm_9.tif	Coris julis	0.265	Harpacticoida	3.2	0.494	35	0.536437
1	43	21_x2.5_35mm_9.tif	Coris julis	0.252	Harpacticoida	2.5	0.39	35	0.646154
4	43	21_x2.5_35mm_9.tif	Coris julis	0.756	Tanaidacea	2.5	0.39	35	1.93846
1	44	22_x6.3_30mm_10.tif	Coris julis	0.51	Harpacticoida	6.3	0.98	30	0.520408
1	44	23(b)_x2.5_30mm_10.tif	Coris julis	0.191	Harpacticoida	2.5	0.39	30	0.489744
2	44	23(b)_x2.5_30mm_10.tif	Coris julis	0.268	Harpacticoida	2.5	0.39	30	0.687179
3	44	23(b)_x2.5_30mm_10.tif	Coris julis	0.187	Harpacticoida	2.5	0.39	30	0.479487
4	44	23(b)_x2.5_30mm_10.tif	Coris julis	0.146	Harpacticoida	2.5	0.39	30	0.374359
5	44	23(b)_x2.5_30mm_10.tif	Coris julis	0.168	Harpacticoida	2.5	0.39	30	0.430769
6	44	23(b)_x2.5_30mm_10.tif	Coris julis	0.135	Harpacticoida	2.5	0.39	30	0.346154
7	44	23(b)_x2.5_30mm_10.tif	Coris julis	0.195	Harpacticoida	2.5	0.39	30	0.5
8	44	23(b)_x2.5_30mm_10.tif	Coris julis	0.167	Harpacticoida	2.5	0.39	30	0.428205
9	44	23(b)_x2.5_30mm_10.tif	Coris julis	0.189	Harpacticoida	2.5	0.39	30	0.484615
10	44	23(b)_x2.5_30mm_10.tif	Coris julis	0.161	Harpacticoida	2.5	0.39	30	0.412821
11	44	23(b)_x2.5_30mm_10.tif	Coris julis	0.204	Harpacticoida	2.5	0.39	30	0.523077
12	44	23(b)_x2.5_30mm_10.tif	Coris julis	0.148	Harpacticoida	2.5	0.39	30	0.379487
13	44	23(b)_x2.5_30mm_10.tif	Coris julis	0.258	Harpacticoida	2.5	0.39	30	0.661538
14	44	23(b)_x2.5_30mm_10.tif	Coris julis	0.23	Harpacticoida	2.5	0.39	30	0.589744
15	44	23(b)_x2.5_30mm_10.tif	Coris julis	0.145	Harpacticoida	2.5	0.39	30	0.371795
16	44	23(b)_x2.5_30mm_10.tif	Coris julis	0.174	Harpacticoida	2.5	0.39	30	0.446154
1	44	23_x2.0_30mm_10.tif	Coris julis	0.148	Harpacticoida	2	0.31	30	0.477419
2	44	23_x2.0_30mm_10.tif	Coris julis	0.124	Harpacticoida	2	0.31	30	0.4
3	44	23_x2.0_30mm_10.tif	Coris julis	0.117	Harpacticoida	2	0.31	30	0.377419
4	44	23_x2.0_30mm_10.tif	Coris julis	0.193	Harpacticoida	2	0.31	30	0.622581
5	44	23_x2.0_30mm_10.tif	Coris julis	0.161	Harpacticoida	2	0.31	30	0.519355
6	44	23_x2.0_30mm_10.tif	Coris julis	0.237	Harpacticoida	2	0.31	30	0.764516
7	44	23_x2.0_30mm_10.tif	Coris julis	0.128	Harpacticoida	2	0.31	30	0.412903
8	44	23_x2.0_30mm_10.tif	Coris julis	0.171	Harpacticoida	2	0.31	30	0.551613
1	44	24_x3.2_30mm_10.tif	Coris julis	2.44	Polychaeta	3.2	0.494	30	4.93927
1	45	31_x3.2_37mm_12.tif	Coris julis	0.459	Amphipoda	3.2	0.494	37	0.92915
3	45	29_x3.2_37mm_11.tif	Coris julis	0.475	Bivalvia	3.2	0.494	37	0.961538
1	45	27_x2.5_37mm_11.tif	Coris julis	0.203	Foraminifera	2.5	0.39	37	0.520513
2	45	27_x2.5_37mm_11.tif	Coris julis	0.116	Foraminifera	2.5	0.39	37	0.297436
1	45	29_x3.2_37mm_11.tif	Coris julis	0.26	Foraminifera	3.2	0.494	37	0.526316
1	45	25_x3.2_37mm_11.tif	Coris julis	0.346	Harpacticoida	3.2	0.494	37	0.700405
2	45	25_x3.2_37mm_11.tif	Coris julis	0.222	Harpacticoida	3.2	0.494	37	0.449393
1	45	28_x1.6_37mm_11.tif	Coris julis	0.308	Harpacticoida	1.6	0.247	37	1.24696
4	45	29_x3.2_37mm_11.tif	Coris julis	0.459	Harpacticoida	3.2	0.494	37	0.92915
1	45	30_x2.5_37mm_12.tif	Coris julis	0.253	Harpacticoida	2.5	0.39	37	0.648718
2	45	31_x3.2_37mm_12.tif	Coris julis	0.312	Harpacticoida	3.2	0.494	37	0.631579
3	45	27_x2.5_37mm_11.tif	Coris julis	0.768	Polychaeta	2.5	0.39	37	1.96923
2	45	29_x3.2_37mm_11.tif	Coris julis	0.337	Unidentified	3.2	0.494	37	0.682186
1	46	32_x3.2_22mm_13.tif	Coris julis	0.227	Harpacticoida	3.2	0.494	22	0.459514
2	46	32_x3.2_22mm_13.tif	Coris julis	0.233	Harpacticoida	3.2	0.494	22	0.47166
3	46	32_x3.2_22mm_13.tif	Coris julis	0.209	Harpacticoida	3.2	0.494	22	0.423077
1	46	33_x4.0_22mm_13.tif	Coris julis	0.305	Harpacticoida	4	0.617	22	0.494327
2	46	33_x4.0_22mm_13.tif	Coris julis	0.293	Harpacticoida	4	0.617	22	0.474878
3	46	33_x4.0_22mm_13.tif	Coris julis	0.337	Harpacticoida	4	0.617	22	0.546191
4	46	33_x4.0_22mm_13.tif	Coris julis	0.193	Harpacticoida	4	0.617	22	0.312804
5	46	33_x4.0_22mm_13.tif	Coris julis	0.214	Harpacticoida	4	0.617	22	0.34684
6	46	33_x4.0_22mm_13.tif	Coris julis	0.313	Harpacticoida	4	0.617	22	0.507293
7	46	33_x4.0_22mm_13.tif	Coris julis	0.179	Harpacticoida	4	0.617	22	0.290113
1	47	37_x4.0_30mm_14.tif	Coris julis	0.224	Gastropoda	4	0.617	30	0.363047
2	47	37_x4.0_30mm_14.tif	Coris julis	0.173	Gastropoda	4	0.617	30	0.280389
3	47	37_x4.0_30mm_14.tif	Coris julis	0.193	Gastropoda	4	0.617	30	0.312804
1	47	34_x2.0_30mm_14.tif	Coris julis	0.281	Harpacticoida	2	0.31	30	0.906452
2	47	34_x2.0_30mm_14.tif	Coris julis	0.165	Harpacticoida	2	0.31	30	0.532258
1	47	35_x2.5_30mm_14.tif	Coris julis	0.296	Harpacticoida	2.5	0.39	30	0.758974
2	47	35_x2.5_30mm_14.tif	Coris julis	0.411	Harpacticoida	2.5	0.39	30	1.05385
3	47	35_x2.5_30mm_14.tif	Coris julis	0.221	Harpacticoida	2.5	0.39	30	0.566667
4	47	35_x2.5_30mm_14.tif	Coris julis	0.247	Harpacticoida	2.5	0.39	30	0.633333
1	47	36_x1.6_30mm_14.tif	Coris julis	0.278	Harpacticoida	1.6	0.247	30	1.12551
2	47	36_x1.6_30mm_14.tif	Coris julis	0.173	Harpacticoida	1.6	0.247	30	0.700405
3	47	36_x1.6_30mm_14.tif	Coris julis	0.117	Harpacticoida	1.6	0.247	30	0.473684
4	47	36_x1.6_30mm_14.tif	Coris julis	0.158	Harpacticoida	1.6	0.247	30	0.639676
5	47	36_x1.6_30mm_14.tif	Coris julis	0.158	Harpacticoida	1.6	0.247	30	0.639676
6	47	36_x1.6_30mm_14.tif	Coris julis	0.198	Harpacticoida	1.6	0.247	30	0.801619
8	47	36_x1.6_30mm_14.tif	Coris julis	0.124	Harpacticoida	1.6	0.247	30	0.502024
7	47	36_x1.6_30mm_14.tif	Coris julis	0.855	Polychaeta	1.6	0.247	30	3.46154
1	48	38_x2.0_38mm_16.tif	Coris julis	0.328	Harpacticoida	2	0.31	38	1.05806
2	48	38_x2.0_38mm_16.tif	Coris julis	0.152	Harpacticoida	2	0.31	38	0.490323
1	48	39_x5.0_38mm_16.tif	Coris julis	0.435	Harpacticoida	5	0.78	38	0.557692
2	50	41_x5.0_32mm_17.tif	Coris julis	0.161	Foraminifera	5	0.78	32	0.20641
1	50	40_x2.5_32mm_17.tif	Coris julis	0.203	Harpacticoida	2.5	0.39	32	0.520513
2	50	40_x2.5_32mm_17.tif	Coris julis	0.168	Harpacticoida	2.5	0.39	32	0.430769
3	50	40_x2.5_32mm_17.tif	Coris julis	0.179	Harpacticoida	2.5	0.39	32	0.458974
4	50	40_x2.5_32mm_17.tif	Coris julis	0.236	Harpacticoida	2.5	0.39	32	0.605128
5	50	40_x2.5_32mm_17.tif	Coris julis	0.199	Harpacticoida	2.5	0.39	32	0.510256
1	50	41_x5.0_32mm_17.tif	Coris julis	0.411	Harpacticoida	5	0.78	32	0.526923
7	51	43_x4.0_30mm_18.tif	Coris julis	0.148	Foraminifera	4	0.617	30	0.23987
1	51	44_x3.2_30mm_18.tif	Coris julis	0.164	Gastropoda	3.2	0.494	30	0.331984
7	51	47_x2.5_30mm_18.tif	Coris julis	0.138	Gastropoda	2.5	0.39	30	0.353846
2	51	42_x2.5_30mm_18.tif	Coris julis	0.312	Harpacticoida	2.5	0.39	30	0.8
1	51	43_x4.0_30mm_18.tif	Coris julis	0.302	Harpacticoida	4	0.617	30	0.489465
2	51	43_x4.0_30mm_18.tif	Coris julis	0.247	Harpacticoida	4	0.617	30	0.400324
3	51	43_x4.0_30mm_18.tif	Coris julis	0.369	Harpacticoida	4	0.617	30	0.598055
4	51	43_x4.0_30mm_18.tif	Coris julis	0.273	Harpacticoida	4	0.617	30	0.442464
5	51	43_x4.0_30mm_18.tif	Coris julis	0.374	Harpacticoida	4	0.617	30	0.606159
6	51	43_x4.0_30mm_18.tif	Coris julis	0.453	Harpacticoida	4	0.617	30	0.734198
1	51	44_x3.2_30mm_18.tif	Coris julis	0.242	Harpacticoida	3.2	0.494	30	0.489879
2	51	44_x3.2_30mm_18.tif	Coris julis	0.275	Harpacticoida	3.2	0.494	30	0.55668
3	51	44_x3.2_30mm_18.tif	Coris julis	0.274	Harpacticoida	3.2	0.494	30	0.554656
4	51	44_x3.2_30mm_18.tif	Coris julis	0.335	Harpacticoida	3.2	0.494	30	0.678138
5	51	44_x3.2_30mm_18.tif	Coris julis	0.21	Harpacticoida	3.2	0.494	30	0.425101
6	51	44_x3.2_30mm_18.tif	Coris julis	0.243	Harpacticoida	3.2	0.494	30	0.491903
7	51	44_x3.2_30mm_18.tif	Coris julis	0.264	Harpacticoida	3.2	0.494	30	0.534413
8	51	44_x3.2_30mm_18.tif	Coris julis	0.446	Harpacticoida	3.2	0.494	30	0.902834
9	51	44_x3.2_30mm_18.tif	Coris julis	0.409	Harpacticoida	3.2	0.494	30	0.827935
1	51	45_x2.0_30mm_18.tif	Coris julis	0.186	Harpacticoida	2	0.31	30	0.6
2	51	45_x2.0_30mm_18.tif	Coris julis	0.209	Harpacticoida	2	0.31	30	0.674194
3	51	45_x2.0_30mm_18.tif	Coris julis	0.202	Harpacticoida	2	0.31	30	0.651613
4	51	45_x2.0_30mm_18.tif	Coris julis	0.176	Harpacticoida	2	0.31	30	0.567742
5	51	45_x2.0_30mm_18.tif	Coris julis	0.169	Harpacticoida	2	0.31	30	0.545161
6	51	45_x2.0_30mm_18.tif	Coris julis	0.159	Harpacticoida	2	0.31	30	0.512903
7	51	45_x2.0_30mm_18.tif	Coris julis	0.234	Harpacticoida	2	0.31	30	0.754839
1	51	46_x2.0_30mm_18.tif	Coris julis	0.189	Harpacticoida	2	0.31	30	0.609677
2	51	46_x2.0_30mm_18.tif	Coris julis	0.178	Harpacticoida	2	0.31	30	0.574194
3	51	46_x2.0_30mm_18.tif	Coris julis	0.214	Harpacticoida	2	0.31	30	0.690323
1	51	47_x2.5_30mm_18.tif	Coris julis	0.201	Harpacticoida	2.5	0.39	30	0.515385
2	51	47_x2.5_30mm_18.tif	Coris julis	0.278	Harpacticoida	2.5	0.39	30	0.712821
3	51	47_x2.5_30mm_18.tif	Coris julis	0.269	Harpacticoida	2.5	0.39	30	0.689744
4	51	47_x2.5_30mm_18.tif	Coris julis	0.254	Harpacticoida	2.5	0.39	30	0.651282
5	51	47_x2.5_30mm_18.tif	Coris julis	0.309	Harpacticoida	2.5	0.39	30	0.792308
6	51	47_x2.5_30mm_18.tif	Coris julis	0.19	Harpacticoida	2.5	0.39	30	0.487179
1	51	48_x2.0_30mm_18.tif	Coris julis	0.17	Harpacticoida	2	0.31	30	0.548387
2	51	48_x2.0_30mm_18.tif	Coris julis	0.167	Harpacticoida	2	0.31	30	0.53871
3	51	48_x2.0_30mm_18.tif	Coris julis	0.152	Harpacticoida	2	0.31	30	0.490323
4	51	48_x2.0_30mm_18.tif	Coris julis	0.21	Harpacticoida	2	0.31	30	0.677419
5	51	48_x2.0_30mm_18.tif	Coris julis	0.258	Harpacticoida	2	0.31	30	0.832258
6	51	48_x2.0_30mm_18.tif	Coris julis	0.194	Harpacticoida	2	0.31	30	0.625806
7	51	48_x2.0_30mm_18.tif	Coris julis	0.224	Harpacticoida	2	0.31	30	0.722581
1	51	49_x2.5_30mm_18.tif	Coris julis	0.21	Harpacticoida	2.5	0.39	30	0.538462
2	51	49_x2.5_30mm_18.tif	Coris julis	0.268	Harpacticoida	2.5	0.39	30	0.687179
3	51	49_x2.5_30mm_18.tif	Coris julis	0.16	Harpacticoida	2.5	0.39	30	0.410256
4	51	49_x2.5_30mm_18.tif	Coris julis	0.217	Harpacticoida	2.5	0.39	30	0.55641
1	51	42_x2.5_30mm_18.tif	Coris julis	0.812	Polychaeta	2.5	0.39	30	2.08205
4	51	46_x2.0_30mm_18.tif	Coris julis	0.585	Polychaeta	2	0.31	30	1.8871
8	51	48_x2.0_30mm_18.tif	Coris julis	0.692	Polychaeta	2	0.31	30	2.23226
9	52	50_x3.2_29mm_19.tif	Coris julis	0.188	Gastropoda	3.2	0.494	29	0.380567
1	52	50_x3.2_29mm_19.tif	Coris julis	0.34	Harpacticoida	3.2	0.494	29	0.688259
2	52	50_x3.2_29mm_19.tif	Coris julis	0.371	Harpacticoida	3.2	0.494	29	0.751012
3	52	50_x3.2_29mm_19.tif	Coris julis	0.378	Harpacticoida	3.2	0.494	29	0.765182
4	52	50_x3.2_29mm_19.tif	Coris julis	0.35	Harpacticoida	3.2	0.494	29	0.708502
5	52	50_x3.2_29mm_19.tif	Coris julis	0.32	Harpacticoida	3.2	0.494	29	0.647773
6	52	50_x3.2_29mm_19.tif	Coris julis	0.319	Harpacticoida	3.2	0.494	29	0.645749
7	52	50_x3.2_29mm_19.tif	Coris julis	0.364	Harpacticoida	3.2	0.494	29	0.736842
8	52	50_x3.2_29mm_19.tif	Coris julis	1.595	Polychaeta	3.2	0.494	29	3.22874
10	52	50_x3.2_29mm_19.tif	Coris julis	0.281	Unidentified	3.2	0.494	29	0.568826
4	53	52_x1.6_35mm_20.tif	Coris julis	1.208	Crustacean appendage	1.6	0.247	35	4.89069
5	53	52_x1.6_35mm_20.tif	Coris julis	1.238	Crustacean appendage	1.6	0.247	35	5.01215
6	53	52_x1.6_35mm_20.tif	Coris julis	0.547	Crustacean appendage	1.6	0.247	35	2.21457
7	53	52_x1.6_35mm_20.tif	Coris julis	0.69	Crustacean appendage	1.6	0.247	35	2.79352
8	53	52_x1.6_35mm_20.tif	Coris julis	0.59	Crustacean appendage	1.6	0.247	35	2.38866
3	53	51_x2.5_35mm_20.tif	Coris julis	0.175	Gastropoda	2.5	0.39	35	0.448718
1	53	51_x2.5_35mm_20.tif	Coris julis	0.386	Harpacticoida	2.5	0.39	35	0.989744
2	53	51_x2.5_35mm_20.tif	Coris julis	0.166	Harpacticoida	2.5	0.39	35	0.425641
1	54	53_x2.0_39mm_21.tif	Coris julis	0.234	Harpacticoida	2	0.31	39	0.754839
3	54	53_x2.0_39mm_21.tif	Coris julis	0.215	Harpacticoida	2	0.31	39	0.693548
2	54	53_x2.0_39mm_21.tif	Coris julis	0.147	Unidentified	2	0.31	39	0.474194
1	55	54_x4.0_35mm_22.tif	Coris julis	0.363	Foraminifera	4	0.617	35	0.588331
2	55	54_x4.0_35mm_22.tif	Coris julis	0.2	Gastropoda	4	0.617	35	0.324149
3	55	54_x4.0_35mm_22.tif	Coris julis	0.324	Harpacticoida	4	0.617	35	0.525122
4	55	54_x4.0_35mm_22.tif	Coris julis	0.239	Harpacticoida	4	0.617	35	0.387358
5	55	54_x4.0_35mm_22.tif	Coris julis	0.35	Harpacticoida	4	0.617	35	0.567261
2	56	55_x3.2_32mm_23.tif	Coris julis	0.191	Gastropoda	3.2	0.494	32	0.38664
1	56	56_x5.0_32mm_23.tif	Coris julis	0.273	Gastropoda	5	0.78	32	0.35
2	56	56_x5.0_32mm_23.tif	Coris julis	0.294	Gastropoda	5	0.78	32	0.376923
3	56	56_x5.0_32mm_23.tif	Coris julis	0.248	Gastropoda	5	0.78	32	0.317949
1	56	55_x3.2_32mm_23.tif	Coris julis	0.312	Harpacticoida	3.2	0.494	32	0.631579
11	57	57_x1.6_29mm_24.tif	Coris julis	0.27	Gastropoda	1.6	0.247	29	1.09312
1	57	57_x1.6_29mm_24.tif	Coris julis	0.126	Harpacticoida	1.6	0.247	29	0.510121
2	57	57_x1.6_29mm_24.tif	Coris julis	0.116	Harpacticoida	1.6	0.247	29	0.469636
3	57	57_x1.6_29mm_24.tif	Coris julis	0.126	Harpacticoida	1.6	0.247	29	0.510121
4	57	57_x1.6_29mm_24.tif	Coris julis	0.144	Harpacticoida	1.6	0.247	29	0.582996
5	57	57_x1.6_29mm_24.tif	Coris julis	0.133	Harpacticoida	1.6	0.247	29	0.538462
6	57	57_x1.6_29mm_24.tif	Coris julis	0.15	Harpacticoida	1.6	0.247	29	0.607287
7	57	57_x1.6_29mm_24.tif	Coris julis	0.181	Harpacticoida	1.6	0.247	29	0.732794
8	57	57_x1.6_29mm_24.tif	Coris julis	0.16	Harpacticoida	1.6	0.247	29	0.647773
9	57	57_x1.6_29mm_24.tif	Coris julis	0.135	Harpacticoida	1.6	0.247	29	0.546559
10	57	57_x1.6_29mm_24.tif	Coris julis	0.119	Unidentified	1.6	0.247	29	0.481781
1	58	58_x2.5_32mm_25.tif	Coris julis	0.196	Harpacticoida	2.5	0.39	32	0.502564
2	58	58_x2.5_32mm_25.tif	Coris julis	0.189	Harpacticoida	2.5	0.39	32	0.484615
3	58	58_x2.5_32mm_25.tif	Coris julis	0.156	Harpacticoida	2.5	0.39	32	0.4
4	58	58_x2.5_32mm_25.tif	Coris julis	0.176	Harpacticoida	2.5	0.39	32	0.451282
5	58	58_x2.5_32mm_25.tif	Coris julis	0.368	Harpacticoida	2.5	0.39	32	0.94359
6	58	58_x2.5_32mm_25.tif	Coris julis	0.239	Harpacticoida	2.5	0.39	32	0.612821
7	58	58_x2.5_32mm_25.tif	Coris julis	0.198	Harpacticoida	2.5	0.39	32	0.507692
8	58	58_x2.5_32mm_25.tif	Coris julis	0.233	Harpacticoida	2.5	0.39	32	0.597436
9	58	58_x2.5_32mm_25.tif	Coris julis	0.241	Harpacticoida	2.5	0.39	32	0.617949
10	58	58_x2.5_32mm_25.tif	Coris julis	0.248	Harpacticoida	2.5	0.39	32	0.635897
11	58	58_x2.5_32mm_25.tif	Coris julis	0.192	Harpacticoida	2.5	0.39	32	0.492308
12	58	58_x2.5_32mm_25.tif	Coris julis	0.182	Harpacticoida	2.5	0.39	32	0.466667
13	58	58_x2.5_32mm_25.tif	Coris julis	0.206	Harpacticoida	2.5	0.39	32	0.528205
14	58	58_x2.5_32mm_25.tif	Coris julis	0.201	Harpacticoida	2.5	0.39	32	0.515385
15	58	58_x2.5_32mm_25.tif	Coris julis	0.172	Harpacticoida	2.5	0.39	32	0.441026
16	58	58_x2.5_32mm_25.tif	Coris julis	0.136	Harpacticoida	2.5	0.39	32	0.348718
17	58	58_x2.5_32mm_25.tif	Coris julis	0.223	Harpacticoida	2.5	0.39	32	0.571795
18	58	58_x2.5_32mm_25.tif	Coris julis	0.228	Harpacticoida	2.5	0.39	32	0.584615
1	59	59_x3.2_32mm_25.tif	Coris julis	0.225	Harpacticoida	3.2	0.494	32	0.455466
2	59	59_x3.2_32mm_25.tif	Coris julis	0.19	Harpacticoida	3.2	0.494	32	0.384615
3	59	59_x3.2_32mm_25.tif	Coris julis	0.217	Harpacticoida	3.2	0.494	32	0.439271
4	59	59_x3.2_32mm_25.tif	Coris julis	0.183	Harpacticoida	3.2	0.494	32	0.370445
4	60	60_x3.2_31mm_26.tif	Coris julis	0.417	Gastropoda	3.2	0.494	31	0.84413
5	60	60_x3.2_31mm_26.tif	Coris julis	0.151	Gastropoda	3.2	0.494	31	0.305668
1	60	60_x3.2_31mm_26.tif	Coris julis	0.426	Harpacticoida	3.2	0.494	31	0.862348
2	60	60_x3.2_31mm_26.tif	Coris julis	0.184	Harpacticoida	3.2	0.494	31	0.37247
3	60	60_x3.2_31mm_26.tif	Coris julis	0.189	Harpacticoida	3.2	0.494	31	0.382591
8	61	61_x3.2_31mm_26.tif	Coris julis	0.273	Foraminifera	3.2	0.494	31	0.552632
6	61	61_x3.2_31mm_26.tif	Coris julis	0.129	Gastropoda	3.2	0.494	31	0.261134
7	61	61_x3.2_31mm_26.tif	Coris julis	0.163	Gastropoda	3.2	0.494	31	0.32996
9	61	61_x3.2_31mm_26.tif	Coris julis	0.192	Gastropoda	3.2	0.494	31	0.388664
1	61	61_x3.2_31mm_26.tif	Coris julis	0.238	Harpacticoida	3.2	0.494	31	0.481781
2	61	61_x3.2_31mm_26.tif	Coris julis	0.231	Harpacticoida	3.2	0.494	31	0.467611
3	61	61_x3.2_31mm_26.tif	Coris julis	0.279	Harpacticoida	3.2	0.494	31	0.564777
4	61	61_x3.2_31mm_26.tif	Coris julis	0.257	Harpacticoida	3.2	0.494	31	0.520243
5	61	61_x3.2_31mm_26.tif	Coris julis	0.309	Harpacticoida	3.2	0.494	31	0.625506
1	62	62_x3.2_35mm_27.tif	Coris julis	0.223	Harpacticoida	3.2	0.494	35	0.451417
2	62	62_x3.2_35mm_27.tif	Coris julis	0.313	Harpacticoida	3.2	0.494	35	0.633603
3	62	62_x3.2_35mm_27.tif	Coris julis	0.345	Harpacticoida	3.2	0.494	35	0.698381
4	62	62_x3.2_35mm_27.tif	Coris julis	0.27	Harpacticoida	3.2	0.494	35	0.546559
5	62	62_x3.2_35mm_27.tif	Coris julis	0.499	Harpacticoida	3.2	0.494	35	1.01012
6	62	62_x3.2_35mm_27.tif	Coris julis	0.228	Harpacticoida	3.2	0.494	35	0.461538
1	63	63_x1.25_42mm_28.tif	Coris julis	0.081	Gastropoda	1.25	0.153	42	0.529412
2	63	63_x1.25_42mm_28.tif	Coris julis	0.117	Gastropoda	1.25	0.153	42	0.764706
3	63	63_x1.25_42mm_28.tif	Coris julis	0.585	Polychaeta	1.25	0.153	42	3.82353
4	63	63_x1.25_42mm_28.tif	Coris julis	0.593	Polychaeta	1.25	0.153	42	3.87582
5	63	63_x1.25_42mm_28.tif	Coris julis	1.571	Polychaeta	1.25	0.153	42	10.268
1	64	65_x3.2_29mm_29.tif	Coris julis	0.166	Gastropoda	3.2	0.494	29	0.336032
2	64	65_x3.2_29mm_29.tif	Coris julis	0.169	Gastropoda	3.2	0.494	29	0.342105
3	65	67_x2.0_33mm_30.tif	Coris julis	0.182	Harpacticoida	2	0.31	33	0.587097
1	65	67_x2.0_33mm_30.tif	Coris julis	0.924	Polychaeta	2	0.31	33	2.98065
2	65	67_x2.0_33mm_30.tif	Coris julis	0.582	Polychaeta	2	0.31	33	1.87742
1	66	68_x2.5_33mm_30.tif	Coris julis	0.284	Harpacticoida	2.5	0.39	33	0.728205
2	66	68_x2.5_33mm_30.tif	Coris julis	0.27	Harpacticoida	2.5	0.39	33	0.692308
3	66	68_x2.5_33mm_30.tif	Coris julis	0.275	Harpacticoida	2.5	0.39	33	0.705128
4	66	68_x2.5_33mm_30.tif	Coris julis	0.343	Harpacticoida	2.5	0.39	33	0.879487
5	67	70_x2.5_30mm_31.tif	Coris julis	0.124	Gastropoda	2.5	0.39	30	0.317949
6	67	70_x2.5_30mm_31.tif	Coris julis	0.161	Gastropoda	2.5	0.39	30	0.412821
1	67	70_x2.5_30mm_31.tif	Coris julis	0.359	Harpacticoida	2.5	0.39	30	0.920513
2	67	70_x2.5_30mm_31.tif	Coris julis	0.272	Harpacticoida	2.5	0.39	30	0.697436
3	67	70_x2.5_30mm_31.tif	Coris julis	0.216	Harpacticoida	2.5	0.39	30	0.553846
4	67	70_x2.5_30mm_31.tif	Coris julis	0.458	Harpacticoida	2.5	0.39	30	1.17436
1	68	71_x2.5_29mm_32.tif	Coris julis	0.248	Harpacticoida	2.5	0.39	29	0.635897
2	68	71_x2.5_29mm_32.tif	Coris julis	0.287	Harpacticoida	2.5	0.39	29	0.735897
1	68	72_x2.5_29mm_32.tif	Coris julis	0.284	Harpacticoida	2.5	0.39	29	0.728205
2	68	72_x2.5_29mm_32.tif	Coris julis	0.511	Harpacticoida	2.5	0.39	29	1.31026
3	68	72_x2.5_29mm_32.tif	Coris julis	0.281	Harpacticoida	2.5	0.39	29	0.720513
4	68	72_x2.5_29mm_32.tif	Coris julis	0.386	Harpacticoida	2.5	0.39	29	0.989744
5	68	72_x2.5_29mm_32.tif	Coris julis	0.347	Harpacticoida	2.5	0.39	29	0.889744
6	68	72_x2.5_29mm_32.tif	Coris julis	0.27	Harpacticoida	2.5	0.39	29	0.692308
5	69	73_x3.2_33mm_33.tif	Coris julis	0.321	Gastropoda	3.2	0.494	33	0.649798
1	69	78_x4.0_33mm_33.tif	Coris julis	0.327	Gastropoda	4	0.617	33	0.529984
1	69	73_x3.2_33mm_33.tif	Coris julis	0.335	Harpacticoida	3.2	0.494	33	0.678138
2	69	73_x3.2_33mm_33.tif	Coris julis	0.243	Harpacticoida	3.2	0.494	33	0.491903
3	69	73_x3.2_33mm_33.tif	Coris julis	0.344	Harpacticoida	3.2	0.494	33	0.696356
1	69	74_x4.0_33mm_33.tif	Coris julis	0.41	Harpacticoida	4	0.617	33	0.664506
2	69	74_x4.0_33mm_33.tif	Coris julis	0.415	Harpacticoida	4	0.617	33	0.672609
1	69	75_x4.0_33mm_33.tif	Coris julis	0.322	Harpacticoida	4	0.617	33	0.52188
2	69	75_x4.0_33mm_33.tif	Coris julis	0.394	Harpacticoida	4	0.617	33	0.638574
3	69	75_x4.0_33mm_33.tif	Coris julis	0.537	Harpacticoida	4	0.617	33	0.87034
4	69	75_x4.0_33mm_33.tif	Coris julis	0.304	Harpacticoida	4	0.617	33	0.492707
1	69	77_x2.5_33mm_33.tif	Coris julis	0.301	Harpacticoida	2.5	0.39	33	0.771795
1	69	76_x2.5_33mm_33.tif	Coris julis	0.912	Hydroid	2.5	0.39	33	2.33846
4	69	73_x3.2_33mm_33.tif	Coris julis	0.384	Unidentified	3.2	0.494	33	0.777328
2	70	84_x4.0_41mm_34.tif	Coris julis	0.3	Acari	4	0.617	41	0.486224
1	70	84_x4.0_41mm_34.tif	Coris julis	0.207	Gastropoda	4	0.617	41	0.335494
1	70	79_x2.0_41mm_34.tif	Coris julis	0.363	Harpacticoida	2	0.31	41	1.17097
2	70	79_x2.0_41mm_34.tif	Coris julis	0.314	Harpacticoida	2	0.31	41	1.0129
1	70	80_x2.5_41mm_34.tif	Coris julis	0.269	Harpacticoida	2.5	0.39	41	0.689744
2	70	80_x2.5_41mm_34.tif	Coris julis	0.192	Harpacticoida	2.5	0.39	41	0.492308
3	70	80_x2.5_41mm_34.tif	Coris julis	0.199	Harpacticoida	2.5	0.39	41	0.510256
1	70	81_x2.0_41mm_34.tif	Coris julis	0.361	Harpacticoida	2	0.31	41	1.16452
2	70	81_x2.0_41mm_34.tif	Coris julis	0.261	Harpacticoida	2	0.31	41	0.841935
1	70	83_x2.0_41mm_34.tif	Coris julis	0.259	Harpacticoida	2	0.31	41	0.835484
2	70	83_x2.0_41mm_34.tif	Coris julis	0.551	Polychaeta	2	0.31	41	1.77742
3	70	83_x2.0_41mm_34.tif	Coris julis	1.003	Polychaeta	2	0.31	41	3.23548
2	71	85_x1.6_43mm_36.tif	Coris julis	0.227	Harpacticoida	1.6	0.247	43	0.919028
1	71	85_x1.6_43mm_36.tif	Coris julis	1.456	Polychaeta	1.6	0.247	43	5.89474
1	71	86_x2.5_43mm_36.tif	Coris julis	2.192	Polychaeta	2.5	0.39	43	5.62051
2	71	86_x2.5_43mm_36.tif	Coris julis	0.135	Unidentified	2.5	0.39	43	0.346154
1	72	1_x3.2_42mm_1.tif	Coris julis	0.373	Gastropoda	3.2	0.494	42	0.755061
2	72	1_x3.2_42mm_1.tif	Coris julis	0.142	Gastropoda	3.2	0.494	42	0.287449
1	72	2_x2.0_42mm_1.tif	Coris julis	0.173	Gastropoda	2	0.31	42	0.558065
2	72	2_x2.0_42mm_1.tif	Coris julis	0.154	Gastropoda	2	0.31	42	0.496774
3	72	2_x2.0_42mm_1.tif	Coris julis	0.148	Gastropoda	2	0.31	42	0.477419
4	72	2_x2.0_42mm_1.tif	Coris julis	0.208	Gastropoda	2	0.31	42	0.670968
5	72	2_x2.0_42mm_1.tif	Coris julis	0.13	Gastropoda	2	0.31	42	0.419355
8	72	2_x2.0_42mm_1.tif	Coris julis	0.141	Gastropoda	2	0.31	42	0.454839
1	72	3_1.25_42mm_1.tif	Coris julis	0.117	Gastropoda	1.25	0.153	42	0.764706
2	72	3_1.25_42mm_1.tif	Coris julis	0.239	Gastropoda	1.25	0.153	42	1.56209
3	72	3_1.25_42mm_1.tif	Coris julis	0.122	Gastropoda	1.25	0.153	42	0.797386
4	72	3_1.25_42mm_1.tif	Coris julis	0.11	Gastropoda	1.25	0.153	42	0.718954
5	72	3_1.25_42mm_1.tif	Coris julis	0.243	Gastropoda	1.25	0.153	42	1.58824
12	72	3_1.25_42mm_1.tif	Coris julis	0.127	Gastropoda	1.25	0.153	42	0.830065
13	72	3_1.25_42mm_1.tif	Coris julis	0.09	Gastropoda	1.25	0.153	42	0.588235
6	72	2_x2.0_42mm_1.tif	Coris julis	0.269	Harpacticoida	2	0.31	42	0.867742
7	72	2_x2.0_42mm_1.tif	Coris julis	0.366	Harpacticoida	2	0.31	42	1.18065
6	72	3_1.25_42mm_1.tif	Coris julis	0.175	Harpacticoida	1.25	0.153	42	1.14379
7	72	3_1.25_42mm_1.tif	Coris julis	0.127	Harpacticoida	1.25	0.153	42	0.830065
8	72	3_1.25_42mm_1.tif	Coris julis	0.233	Harpacticoida	1.25	0.153	42	1.52288
9	72	3_1.25_42mm_1.tif	Coris julis	0.158	Harpacticoida	1.25	0.153	42	1.03268
10	72	3_1.25_42mm_1.tif	Coris julis	0.135	Harpacticoida	1.25	0.153	42	0.882353
11	72	3_1.25_42mm_1.tif	Coris julis	0.12	Harpacticoida	1.25	0.153	42	0.784314
1	73	4_1.25_50mm_2.tif	Coris julis	0.273	Gastropoda	1.25	0.153	50	1.78431
2	73	4_1.25_50mm_2.tif	Coris julis	0.083	Gastropoda	1.25	0.153	50	0.542484
3	73	4_1.25_50mm_2.tif	Coris julis	0.08	Gastropoda	1.25	0.153	50	0.522876
4	73	4_1.25_50mm_2.tif	Coris julis	0.115	Gastropoda	1.25	0.153	50	0.751634
5	73	4_1.25_50mm_2.tif	Coris julis	0.122	Gastropoda	1.25	0.153	50	0.797386
6	73	4_1.25_50mm_2.tif	Coris julis	0.074	Gastropoda	1.25	0.153	50	0.48366
7	73	4_1.25_50mm_2.tif	Coris julis	0.079	Gastropoda	1.25	0.153	50	0.51634
8	73	4_1.25_50mm_2.tif	Coris julis	0.077	Gastropoda	1.25	0.153	50	0.503268
9	73	4_1.25_50mm_2.tif	Coris julis	0.243	Gastropoda	1.25	0.153	50	1.58824
10	73	4_1.25_50mm_2.tif	Coris julis	0.061	Gastropoda	1.25	0.153	50	0.398693
11	73	4_1.25_50mm_2.tif	Coris julis	0.13	Gastropoda	1.25	0.153	50	0.849673
12	73	4_1.25_50mm_2.tif	Coris julis	0.3	Gastropoda	1.25	0.153	50	1.96078
13	73	4_1.25_50mm_2.tif	Coris julis	0.248	Harpacticoida	1.25	0.153	50	1.62092
3	74	5_x1.25_58mm_3.tif	Coris julis	0.156	Foraminifera	1.25	0.153	58	1.01961
1	74	5_x1.25_58mm_3.tif	Coris julis	0.16	Gastropoda	1.25	0.153	58	1.04575
2	74	5_x1.25_58mm_3.tif	Coris julis	0.153	Gastropoda	1.25	0.153	58	1
4	74	5_x1.25_58mm_3.tif	Coris julis	0.171	Gastropoda	1.25	0.153	58	1.11765
5	74	5_x1.25_58mm_3.tif	Coris julis	0.169	Gastropoda	1.25	0.153	58	1.10458
6	74	5_x1.25_58mm_3.tif	Coris julis	0.188	Gastropoda	1.25	0.153	58	1.22876
7	74	5_x1.25_58mm_3.tif	Coris julis	0.137	Gastropoda	1.25	0.153	58	0.895425
8	74	5_x1.25_58mm_3.tif	Coris julis	0.286	Gastropoda	1.25	0.153	58	1.86928
9	74	5_x1.25_58mm_3.tif	Coris julis	0.128	Gastropoda	1.25	0.153	58	0.836601
1	75	6_x1.25_64mm_4.tif	Coris julis	0.108	Foraminifera	1.25	0.153	64	0.705882
2	75	6_x1.25_64mm_4.tif	Coris julis	0.183	Gastropoda	1.25	0.153	64	1.19608
3	75	6_x1.25_64mm_4.tif	Coris julis	0.115	Gastropoda	1.25	0.153	64	0.751634
4	75	6_x1.25_64mm_4.tif	Coris julis	0.091	Gastropoda	1.25	0.153	64	0.594771
5	75	6_x1.25_64mm_4.tif	Coris julis	0.108	Gastropoda	1.25	0.153	64	0.705882
6	75	6_x1.25_64mm_4.tif	Coris julis	0.134	Gastropoda	1.25	0.153	64	0.875817
7	75	6_x1.25_64mm_4.tif	Coris julis	0.121	Gastropoda	1.25	0.153	64	0.79085
8	75	6_x1.25_64mm_4.tif	Coris julis	0.087	Gastropoda	1.25	0.153	64	0.568627
9	75	6_x1.25_64mm_4.tif	Coris julis	0.109	Gastropoda	1.25	0.153	64	0.712418
10	75	6_x1.25_64mm_4.tif	Coris julis	0.236	Gastropoda	1.25	0.153	64	1.54248
1	75	7_x1.6_64mm_4.tif	Coris julis	0.137	Gastropoda	1.6	0.247	64	0.554656
2	75	7_x1.6_64mm_4.tif	Coris julis	0.159	Gastropoda	1.6	0.247	64	0.643725
3	75	7_x1.6_64mm_4.tif	Coris julis	0.127	Gastropoda	1.6	0.247	64	0.51417
4	75	7_x1.6_64mm_4.tif	Coris julis	0.139	Gastropoda	1.6	0.247	64	0.562753
5	75	7_x1.6_64mm_4.tif	Coris julis	0.146	Gastropoda	1.6	0.247	64	0.591093
1	75	8_x1.25_64mm_4.tif	Coris julis	0.141	Gastropoda	1.25	0.153	64	0.921569
2	75	8_x1.25_64mm_4.tif	Coris julis	0.165	Gastropoda	1.25	0.153	64	1.07843
3	75	8_x1.25_64mm_4.tif	Coris julis	0.224	Gastropoda	1.25	0.153	64	1.46405
4	75	8_x1.25_64mm_4.tif	Coris julis	0.136	Gastropoda	1.25	0.153	64	0.888889
5	75	8_x1.25_64mm_4.tif	Coris julis	0.147	Gastropoda	1.25	0.153	64	0.960784
6	75	8_x1.25_64mm_4.tif	Coris julis	0.121	Gastropoda	1.25	0.153	64	0.79085
7	75	8_x1.25_64mm_4.tif	Coris julis	0.13	Gastropoda	1.25	0.153	64	0.849673
8	75	8_x1.25_64mm_4.tif	Coris julis	0.114	Gastropoda	1.25	0.153	64	0.745098
9	75	8_x1.25_64mm_4.tif	Coris julis	0.127	Gastropoda	1.25	0.153	64	0.830065
10	75	8_x1.25_64mm_4.tif	Coris julis	0.129	Gastropoda	1.25	0.153	64	0.843137
11	75	8_x1.25_64mm_4.tif	Coris julis	0.097	Gastropoda	1.25	0.153	64	0.633987
13	75	8_x1.25_64mm_4.tif	Coris julis	0.102	Gastropoda	1.25	0.153	64	0.666667
11	75	6_x1.25_64mm_4.tif	Coris julis	0.261	Harpacticoida	1.25	0.153	64	1.70588
12	75	6_x1.25_64mm_4.tif	Coris julis	0.405	Harpacticoida	1.25	0.153	64	2.64706
12	75	8_x1.25_64mm_4.tif	Coris julis	0.232	Harpacticoida	1.25	0.153	64	1.51634
14	75	8_x1.25_64mm_4.tif	Coris julis	0.17	Harpacticoida	1.25	0.153	64	1.11111
13	75	6_x1.25_64mm_4.tif	Coris julis	1.956	Polychaeta	1.25	0.153	64	12.7843
10	76	9_x1.25_62mm_5.tif	Coris julis	0.127	Foraminifera	1.25	0.153	62	0.830065
1	76	9_x1.25_62mm_5.tif	Coris julis	0.15	Gastropoda	1.25	0.153	62	0.980392
2	76	9_x1.25_62mm_5.tif	Coris julis	0.147	Gastropoda	1.25	0.153	62	0.960784
3	76	9_x1.25_62mm_5.tif	Coris julis	0.175	Gastropoda	1.25	0.153	62	1.14379
4	76	9_x1.25_62mm_5.tif	Coris julis	0.121	Gastropoda	1.25	0.153	62	0.79085
5	76	9_x1.25_62mm_5.tif	Coris julis	0.139	Gastropoda	1.25	0.153	62	0.908497
6	76	9_x1.25_62mm_5.tif	Coris julis	0.313	Gastropoda	1.25	0.153	62	2.04575
7	76	9_x1.25_62mm_5.tif	Coris julis	0.124	Gastropoda	1.25	0.153	62	0.810458
8	76	9_x1.25_62mm_5.tif	Coris julis	0.131	Gastropoda	1.25	0.153	62	0.856209
9	76	9_x1.25_62mm_5.tif	Coris julis	0.184	Gastropoda	1.25	0.153	62	1.20261
13	76	9_x1.25_62mm_5.tif	Coris julis	0.215	Harpacticoida	1.25	0.153	62	1.40523
11	76	9_x1.25_62mm_5.tif	Coris julis	1.179	Polychaeta	1.25	0.153	62	7.70588
12	76	9_x1.25_62mm_5.tif	Coris julis	1.123	Polychaeta	1.25	0.153	62	7.33987
13	77	10_x1.25_63mm_6.tif	Coris julis	0.113	Foraminifera	1.25	0.153	63	0.738562
1	77	10_x1.25_63mm_6.tif	Coris julis	0.347	Gastropoda	1.25	0.153	63	2.26797
2	77	10_x1.25_63mm_6.tif	Coris julis	0.269	Gastropoda	1.25	0.153	63	1.75817
3	77	10_x1.25_63mm_6.tif	Coris julis	0.171	Gastropoda	1.25	0.153	63	1.11765
4	77	10_x1.25_63mm_6.tif	Coris julis	0.216	Gastropoda	1.25	0.153	63	1.41176
5	77	10_x1.25_63mm_6.tif	Coris julis	0.213	Gastropoda	1.25	0.153	63	1.39216
6	77	10_x1.25_63mm_6.tif	Coris julis	0.124	Gastropoda	1.25	0.153	63	0.810458
7	77	10_x1.25_63mm_6.tif	Coris julis	0.095	Gastropoda	1.25	0.153	63	0.620915
8	77	10_x1.25_63mm_6.tif	Coris julis	0.088	Gastropoda	1.25	0.153	63	0.575163
9	77	10_x1.25_63mm_6.tif	Coris julis	0.113	Gastropoda	1.25	0.153	63	0.738562
10	77	10_x1.25_63mm_6.tif	Coris julis	0.254	Gastropoda	1.25	0.153	63	1.66013
11	77	10_x1.25_63mm_6.tif	Coris julis	0.184	Gastropoda	1.25	0.153	63	1.20261
12	77	10_x1.25_63mm_6.tif	Coris julis	0.124	Gastropoda	1.25	0.153	63	0.810458
14	77	10_x1.25_63mm_6.tif	Coris julis	0.809	Polychaeta	1.25	0.153	63	5.28758
1	78	12_x1.0_50mm_7.tif	Coris julis	0.143	Gastropoda	1	0.153	50	0.934641
2	78	12_x1.0_50mm_7.tif	Coris julis	0.136	Gastropoda	1	0.153	50	0.888889
3	78	12_x1.0_50mm_7.tif	Coris julis	0.168	Gastropoda	1	0.153	50	1.09804
4	78	12_x1.0_50mm_7.tif	Coris julis	0.145	Gastropoda	1	0.153	50	0.947712
5	78	12_x1.0_50mm_7.tif	Coris julis	0.152	Gastropoda	1	0.153	50	0.993464
6	78	12_x1.0_50mm_7.tif	Coris julis	0.13	Gastropoda	1	0.153	50	0.849673
7	78	12_x1.0_50mm_7.tif	Coris julis	0.117	Harpacticoida	1	0.153	50	0.764706
8	78	12_x1.0_50mm_7.tif	Coris julis	0.091	Harpacticoida	1	0.153	50	0.594771
9	78	12_x1.0_50mm_7.tif	Coris julis	0.149	Harpacticoida	1	0.153	50	0.973856
10	78	12_x1.0_50mm_7.tif	Coris julis	0.176	Harpacticoida	1	0.153	50	1.15033
11	78	12_x1.0_50mm_7.tif	Coris julis	0.528	Harpacticoida	1	0.153	50	3.45098
1	79	13_x1.25_62mm_8.tif	Coris julis	0.237	Gastropoda	1.25	0.153	62	1.54902
2	79	13_x1.25_62mm_8.tif	Coris julis	0.186	Gastropoda	1.25	0.153	62	1.21569
3	79	13_x1.25_62mm_8.tif	Coris julis	0.142	Gastropoda	1.25	0.153	62	0.928105
4	79	13_x1.25_62mm_8.tif	Coris julis	0.148	Gastropoda	1.25	0.153	62	0.96732
5	79	13_x1.25_62mm_8.tif	Coris julis	0.183	Gastropoda	1.25	0.153	62	1.19608
6	79	13_x1.25_62mm_8.tif	Coris julis	0.14	Gastropoda	1.25	0.153	62	0.915033
7	79	13_x1.25_62mm_8.tif	Coris julis	0.174	Gastropoda	1.25	0.153	62	1.13725
8	79	13_x1.25_62mm_8.tif	Coris julis	0.153	Gastropoda	1.25	0.153	62	1
9	79	13_x1.25_62mm_8.tif	Coris julis	0.148	Gastropoda	1.25	0.153	62	0.96732
1	80	14_x1.6_63mm_9.tif	Coris julis	0.147	Gastropoda	1.6	0.247	63	0.595142
2	80	14_x1.6_63mm_9.tif	Coris julis	0.154	Gastropoda	1.6	0.247	63	0.623482
3	80	14_x1.6_63mm_9.tif	Coris julis	0.217	Gastropoda	1.6	0.247	63	0.878543
4	80	14_x1.6_63mm_9.tif	Coris julis	0.127	Gastropoda	1.6	0.247	63	0.51417
5	80	14_x1.6_63mm_9.tif	Coris julis	0.209	Gastropoda	1.6	0.247	63	0.846154
6	80	14_x1.6_63mm_9.tif	Coris julis	0.129	Gastropoda	1.6	0.247	63	0.522267
7	80	14_x1.6_63mm_9.tif	Coris julis	0.134	Gastropoda	1.6	0.247	63	0.54251
8	80	14_x1.6_63mm_9.tif	Coris julis	0.168	Gastropoda	1.6	0.247	63	0.680162
9	80	14_x1.6_63mm_9.tif	Coris julis	0.165	Gastropoda	1.6	0.247	63	0.668016
10	80	14_x1.6_63mm_9.tif	Coris julis	0.173	Gastropoda	1.6	0.247	63	0.700405
11	80	14_x1.6_63mm_9.tif	Coris julis	0.188	Gastropoda	1.6	0.247	63	0.761134
12	80	14_x1.6_63mm_9.tif	Coris julis	0.128	Gastropoda	1.6	0.247	63	0.518219
13	80	14_x1.6_63mm_9.tif	Coris julis	0.192	Gastropoda	1.6	0.247	63	0.777328
1	80	15_x2.0_63mm_9.tif	Coris julis	0.24	Gastropoda	2	0.31	63	0.774194
2	80	15_x2.0_63mm_9.tif	Coris julis	0.23	Gastropoda	2	0.31	63	0.741935
3	80	15_x2.0_63mm_9.tif	Coris julis	0.196	Gastropoda	2	0.31	63	0.632258
4	80	15_x2.0_63mm_9.tif	Coris julis	0.26	Gastropoda	2	0.31	63	0.83871
5	80	15_x2.0_63mm_9.tif	Coris julis	0.318	Gastropoda	2	0.31	63	1.02581
6	80	15_x2.0_63mm_9.tif	Coris julis	0.292	Gastropoda	2	0.31	63	0.941935
7	80	15_x2.0_63mm_9.tif	Coris julis	0.254	Gastropoda	2	0.31	63	0.819355
4	81	16_x1.6_55mm_10.tif	Coris julis	0.328	Gastropoda	1.6	0.247	55	1.32794
5	81	16_x1.6_55mm_10.tif	Coris julis	0.204	Gastropoda	1.6	0.247	55	0.825911
6	81	16_x1.6_55mm_10.tif	Coris julis	0.241	Gastropoda	1.6	0.247	55	0.975709
7	81	16_x1.6_55mm_10.tif	Coris julis	0.161	Gastropoda	1.6	0.247	55	0.651822
8	81	16_x1.6_55mm_10.tif	Coris julis	0.136	Gastropoda	1.6	0.247	55	0.550607
9	81	16_x1.6_55mm_10.tif	Coris julis	0.084	Gastropoda	1.6	0.247	55	0.340081
1	81	16_x1.6_55mm_10.tif	Coris julis	0.255	Harpacticoida	1.6	0.247	55	1.03239
2	81	16_x1.6_55mm_10.tif	Coris julis	0.255	Harpacticoida	1.6	0.247	55	1.03239
3	81	16_x1.6_55mm_10.tif	Coris julis	0.257	Harpacticoida	1.6	0.247	55	1.04049
10	81	16_x1.6_55mm_10.tif	Coris julis	0.219	Harpacticoida	1.6	0.247	55	0.88664
4	82	17_x1.25_54mm_11.tif	Coris julis	0.117	Gastropoda	1.25	0.153	54	0.764706
5	82	17_x1.25_54mm_11.tif	Coris julis	0.207	Gastropoda	1.25	0.153	54	1.35294
6	82	17_x1.25_54mm_11.tif	Coris julis	0.174	Gastropoda	1.25	0.153	54	1.13725
7	82	17_x1.25_54mm_11.tif	Coris julis	0.245	Gastropoda	1.25	0.153	54	1.60131
8	82	17_x1.25_54mm_11.tif	Coris julis	0.251	Gastropoda	1.25	0.153	54	1.64052
9	82	17_x1.25_54mm_11.tif	Coris julis	0.186	Gastropoda	1.25	0.153	54	1.21569
10	82	17_x1.25_54mm_11.tif	Coris julis	0.133	Gastropoda	1.25	0.153	54	0.869281
11	82	17_x1.25_54mm_11.tif	Coris julis	0.16	Gastropoda	1.25	0.153	54	1.04575
12	82	17_x1.25_54mm_11.tif	Coris julis	0.124	Gastropoda	1.25	0.153	54	0.810458
1	82	17_x1.25_54mm_11.tif	Coris julis	0.308	Harpacticoida	1.25	0.153	54	2.01307
2	82	17_x1.25_54mm_11.tif	Coris julis	0.177	Harpacticoida	1.25	0.153	54	1.15686
3	82	17_x1.25_54mm_11.tif	Coris julis	0.179	Harpacticoida	1.25	0.153	54	1.16993
13	82	17_x1.25_54mm_11.tif	Coris julis	0.563	Polychaeta	1.25	0.153	54	3.67974
2	83	11_x1.6_57mm_7.tif	Coris julis	0.138	Gastropoda	1.6	0.247	57	0.558704
9	83	12_x1.6_57mm_7.tif	Coris julis	0.339	Gastropoda	1.6	0.247	57	1.37247
10	83	12_x1.6_57mm_7.tif	Coris julis	0.263	Gastropoda	1.6	0.247	57	1.06478
11	83	12_x1.6_57mm_7.tif	Coris julis	0.182	Gastropoda	1.6	0.247	57	0.736842
3	83	11_x1.6_57mm_7.tif	Coris julis	0.226	Harpacticoida	1.6	0.247	57	0.91498
4	83	11_x1.6_57mm_7.tif	Coris julis	0.205	Harpacticoida	1.6	0.247	57	0.82996
1	83	12_x1.6_57mm_7.tif	Coris julis	0.241	Harpacticoida	1.6	0.247	57	0.975709
2	83	12_x1.6_57mm_7.tif	Coris julis	0.26	Harpacticoida	1.6	0.247	57	1.05263
3	83	12_x1.6_57mm_7.tif	Coris julis	0.308	Harpacticoida	1.6	0.247	57	1.24696
4	83	12_x1.6_57mm_7.tif	Coris julis	0.34	Harpacticoida	1.6	0.247	57	1.37652
5	83	12_x1.6_57mm_7.tif	Coris julis	0.261	Harpacticoida	1.6	0.247	57	1.05668
6	83	12_x1.6_57mm_7.tif	Coris julis	0.219	Harpacticoida	1.6	0.247	57	0.88664
7	83	12_x1.6_57mm_7.tif	Coris julis	0.23	Harpacticoida	1.6	0.247	57	0.931174
8	83	12_x1.6_57mm_7.tif	Coris julis	0.121	Harpacticoida	1.6	0.247	57	0.489879
1	83	11_x1.6_57mm_7.tif	Coris julis	2.574	Polychaeta	1.6	0.247	57	10.4211
12	83	12_x1.6_57mm_7.tif	Coris julis	1.019	Polychaeta	1.6	0.247	57	4.12551
13	83	12_x1.6_57mm_7.tif	Coris julis	0.504	Polychaeta	1.6	0.247	57	2.04049
1	84	13_x1.25_47mm_8.tif	Coris julis	0.166	Harpacticoida	1.25	0.153	47	1.08497
2	84	13_x1.25_47mm_8.tif	Coris julis	0.174	Harpacticoida	1.25	0.153	47	1.13725
3	84	13_x1.25_47mm_8.tif	Coris julis	0.181	Harpacticoida	1.25	0.153	47	1.18301
4	84	13_x1.25_47mm_8.tif	Coris julis	0.23	Harpacticoida	1.25	0.153	47	1.50327
5	84	13_x1.25_47mm_8.tif	Coris julis	0.211	Harpacticoida	1.25	0.153	47	1.37908
6	84	13_x1.25_47mm_8.tif	Coris julis	0.182	Harpacticoida	1.25	0.153	47	1.18954
7	84	13_x1.25_47mm_8.tif	Coris julis	0.12	Ostracoda	1.25	0.153	47	0.784314
8	84	13_x1.25_47mm_8.tif	Coris julis	1.975	Polychaeta	1.25	0.153	47	12.9085
6	85	14_x1.25_58mm_9.tif	Coris julis	0.087	Acari	1.25	0.153	58	0.568627
1	85	14_x1.25_58mm_9.tif	Coris julis	0.397	Gastropoda	1.25	0.153	58	2.59477
2	85	14_x1.25_58mm_9.tif	Coris julis	0.186	Gastropoda	1.25	0.153	58	1.21569
3	85	14_x1.25_58mm_9.tif	Coris julis	0.178	Gastropoda	1.25	0.153	58	1.1634
4	85	14_x1.25_58mm_9.tif	Coris julis	0.202	Gastropoda	1.25	0.153	58	1.32026
5	85	14_x1.25_58mm_9.tif	Coris julis	0.33	Gastropoda	1.25	0.153	58	2.15686
7	85	14_x1.25_58mm_9.tif	Coris julis	0.15	Harpacticoida	1.25	0.153	58	0.980392
8	85	14_x1.25_58mm_9.tif	Coris julis	0.564	Polychaeta	1.25	0.153	58	3.68627
9	85	14_x1.25_58mm_9.tif	Coris julis	0.415	Polychaeta	1.25	0.153	58	2.71242
10	85	14_x1.25_58mm_9.tif	Coris julis	2.421	Polychaeta	1.25	0.153	58	15.8235
1	86	15_x1.6_55mm_10.tif	Coris julis	0.284	Gastropoda	1.6	0.247	55	1.1498
2	86	15_x1.6_55mm_10.tif	Coris julis	0.196	Gastropoda	1.6	0.247	55	0.793522
3	86	15_x1.6_55mm_10.tif	Coris julis	0.314	Gastropoda	1.6	0.247	55	1.27126
4	86	15_x1.6_55mm_10.tif	Coris julis	0.284	Gastropoda	1.6	0.247	55	1.1498
5	86	15_x1.6_55mm_10.tif	Coris julis	0.397	Gastropoda	1.6	0.247	55	1.60729
6	86	15_x1.6_55mm_10.tif	Coris julis	0.298	Gastropoda	1.6	0.247	55	1.20648
7	86	15_x1.6_55mm_10.tif	Coris julis	0.229	Gastropoda	1.6	0.247	55	0.927126
8	86	15_x1.6_55mm_10.tif	Coris julis	0.221	Gastropoda	1.6	0.247	55	0.894737
1	86	15_x1.6_55mm_10.tif	Coris julis	0.284	Harpacticoida	1.6	0.247	55	1.1498
2	86	15_x1.6_55mm_10.tif	Coris julis	0.196	Harpacticoida	1.6	0.247	55	0.793522
3	86	15_x1.6_55mm_10.tif	Coris julis	0.314	Harpacticoida	1.6	0.247	55	1.27126
4	86	15_x1.6_55mm_10.tif	Coris julis	0.284	Harpacticoida	1.6	0.247	55	1.1498
5	86	15_x1.6_55mm_10.tif	Coris julis	0.397	Harpacticoida	1.6	0.247	55	1.60729
6	86	15_x1.6_55mm_10.tif	Coris julis	0.298	Harpacticoida	1.6	0.247	55	1.20648
7	86	15_x1.6_55mm_10.tif	Coris julis	0.229	Harpacticoida	1.6	0.247	55	0.927126
8	86	15_x1.6_55mm_10.tif	Coris julis	0.221	Harpacticoida	1.6	0.247	55	0.894737
9	86	15_x1.6_55mm_10.tif	Coris julis	0.338	Harpacticoida	1.6	0.247	55	1.36842
10	86	15_x1.6_55mm_10.tif	Coris julis	0.212	Harpacticoida	1.6	0.247	55	0.8583
11	86	15_x1.6_55mm_10.tif	Coris julis	0.26	Harpacticoida	1.6	0.247	55	1.05263
12	86	15_x1.6_55mm_10.tif	Coris julis	0.103	Harpacticoida	1.6	0.247	55	0.417004
13	86	15_x1.6_55mm_10.tif	Coris julis	0.184	Harpacticoida	1.6	0.247	55	0.744939
14	86	15_x1.6_55mm_10.tif	Coris julis	0.157	Harpacticoida	1.6	0.247	55	0.635628
15	86	15_x1.6_55mm_10.tif	Coris julis	0.188	Harpacticoida	1.6	0.247	55	0.761134
16	86	15_x1.6_55mm_10.tif	Coris julis	0.256	Harpacticoida	1.6	0.247	55	1.03644
1	87	16_x2.0_58mm_11.tif	Coris julis	0.341	Gastropoda	2	0.31	58	1.1
2	87	16_x2.0_58mm_11.tif	Coris julis	0.277	Gastropoda	2	0.31	58	0.893548
3	87	16_x2.0_58mm_11.tif	Coris julis	0.159	Gastropoda	2	0.31	58	0.512903
4	87	16_x2.0_58mm_11.tif	Coris julis	1.093	Polychaeta	2	0.31	58	3.52581
5	87	16_x2.0_58mm_11.tif	Coris julis	0.807	Polychaeta	2	0.31	58	2.60323
6	87	16_x2.0_58mm_11.tif	Coris julis	0.216	Unidentified	2	0.31	58	0.696774
7	88	17_x1.6_47mm_12.tif	Coris julis	0.206	Gastropoda	1.6	0.247	47	0.834008
8	88	17_x1.6_47mm_12.tif	Coris julis	0.183	Gastropoda	1.6	0.247	47	0.740891
9	88	17_x1.6_47mm_12.tif	Coris julis	0.27	Gastropoda	1.6	0.247	47	1.09312
1	88	17_x1.6_47mm_12.tif	Coris julis	0.159	Harpacticoida	1.6	0.247	47	0.643725
2	88	17_x1.6_47mm_12.tif	Coris julis	0.36	Harpacticoida	1.6	0.247	47	1.45749
3	88	17_x1.6_47mm_12.tif	Coris julis	0.267	Harpacticoida	1.6	0.247	47	1.08097
4	88	17_x1.6_47mm_12.tif	Coris julis	0.251	Harpacticoida	1.6	0.247	47	1.01619
5	88	17_x1.6_47mm_12.tif	Coris julis	0.194	Harpacticoida	1.6	0.247	47	0.785425
6	88	17_x1.6_47mm_12.tif	Coris julis	0.221	Harpacticoida	1.6	0.247	47	0.894737
10	88	17_x1.6_47mm_12.tif	Coris julis	1.599	Polychaeta	1.6	0.247	47	6.47368
1	89	18_x2.0_42mm_13.tif	Coris julis	0.275	Harpacticoida	2	0.31	42	0.887097
2	89	18_x2.0_42mm_13.tif	Coris julis	0.323	Harpacticoida	2	0.31	42	1.04194
3	89	18_x2.0_42mm_13.tif	Coris julis	0.183	Harpacticoida	2	0.31	42	0.590323
1	90	19_x1.6_4mm_13.tif	Coris julis	0.338	Harpacticoida	1.6	0.247	40	1.36842
2	90	19_x1.6_4mm_13.tif	Coris julis	0.259	Harpacticoida	1.6	0.247	40	1.04858
3	90	19_x1.6_4mm_13.tif	Coris julis	0.291	Harpacticoida	1.6	0.247	40	1.17814
1	91	21_x2.0_53mm_14.tif	Coris julis	0.19	Foraminifera	2	0.31	53	0.612903
6	91	21_x2.0_53mm_14.tif	Coris julis	0.092	Foraminifera	2	0.31	53	0.296774
2	91	21_x2.0_53mm_14.tif	Coris julis	0.141	Gastropoda	2	0.31	53	0.454839
2	91	20_x1.25_53mm_14.tif	Coris julis	0.192	Harpacticoida	1.25	0.153	53	1.2549
7	91	21_x2.0_53mm_14.tif	Coris julis	0.254	Harpacticoida	2	0.31	53	0.819355
3	91	21_x2.0_53mm_14.tif	Coris julis	0.161	Ostracoda	2	0.31	53	0.519355
4	91	21_x2.0_53mm_14.tif	Coris julis	0.182	Ostracoda	2	0.31	53	0.587097
1	91	20_x1.25_53mm_14.tif	Coris julis	0.894	Polychaeta	1.25	0.153	53	5.84314
5	91	21_x2.0_53mm_14.tif	Coris julis	2.895	Polychaeta	2	0.31	53	9.33871
4	92	22_x2.5_59mm_15.tif	Coris julis	0.133	Gastropoda	2.5	0.39	59	0.341026
5	92	22_x2.5_59mm_15.tif	Coris julis	0.177	Gastropoda	2.5	0.39	59	0.453846
1	92	22_x2.5_59mm_15.tif	Coris julis	0.259	Harpacticoida	2.5	0.39	59	0.664103
2	92	22_x2.5_59mm_15.tif	Coris julis	0.496	Harpacticoida	2.5	0.39	59	1.27179
3	92	22_x2.5_59mm_15.tif	Coris julis	0.293	Harpacticoida	2.5	0.39	59	0.751282
1	93	24_x1.6_77mm_16.tif	Coris julis	0.161	Gastropoda	1.6	0.247	77	0.651822
2	93	24_x1.6_77mm_16.tif	Coris julis	0.328	Gastropoda	1.6	0.247	77	1.32794
6	93	25_x1.25_77mm_16.tif	Coris julis	0.71	Gastropoda	1.25	0.153	77	4.64052
7	93	25_x1.25_77mm_16.tif	Coris julis	0.226	Gastropoda	1.25	0.153	77	1.47712
1	93	23_x1.0_77mm_16.tif	Coris julis	0.148	Harpacticoida	1	0.153	77	0.96732
2	93	23_x1.0_77mm_16.tif	Coris julis	0.188	Harpacticoida	1	0.153	77	1.22876
4	93	24_x1.6_77mm_16.tif	Coris julis	0.293	Harpacticoida	1.6	0.247	77	1.18623
5	93	24_x1.6_77mm_16.tif	Coris julis	0.27	Harpacticoida	1.6	0.247	77	1.09312
6	93	24_x1.6_77mm_16.tif	Coris julis	0.338	Harpacticoida	1.6	0.247	77	1.36842
7	93	24_x1.6_77mm_16.tif	Coris julis	0.334	Harpacticoida	1.6	0.247	77	1.35223
8	93	24_x1.6_77mm_16.tif	Coris julis	0.308	Harpacticoida	1.6	0.247	77	1.24696
1	93	25_x1.25_77mm_16.tif	Coris julis	0.25	Harpacticoida	1.25	0.153	77	1.63399
2	93	25_x1.25_77mm_16.tif	Coris julis	0.199	Harpacticoida	1.25	0.153	77	1.30065
3	93	25_x1.25_77mm_16.tif	Coris julis	0.22	Harpacticoida	1.25	0.153	77	1.43791
4	93	25_x1.25_77mm_16.tif	Coris julis	0.221	Harpacticoida	1.25	0.153	77	1.44444
5	93	25_x1.25_77mm_16.tif	Coris julis	0.188	Harpacticoida	1.25	0.153	77	1.22876
3	93	23_x1.0_77mm_16.tif	Coris julis	1.643	Polychaeta	1	0.153	77	10.7386
3	93	24_x1.6_77mm_16.tif	Coris julis	0.961	Polychaeta	1.6	0.247	77	3.89069
1	94	1_x1.6_61mm_1.tif	Coris julis	0.298	Gastropoda	1.6	0.247	61	1.20648
2	94	1_x1.6_61mm_1.tif	Coris julis	0.205	Gastropoda	1.6	0.247	61	0.82996
3	94	1_x1.6_61mm_1.tif	Coris julis	0.258	Gastropoda	1.6	0.247	61	1.04453
4	94	1_x1.6_61mm_1.tif	Coris julis	0.24	Gastropoda	1.6	0.247	61	0.97166
5	94	1_x1.6_61mm_1.tif	Coris julis	0.313	Gastropoda	1.6	0.247	61	1.26721
6	94	1_x1.6_61mm_1.tif	Coris julis	0.191	Gastropoda	1.6	0.247	61	0.773279
7	94	1_x1.6_61mm_1.tif	Coris julis	0.259	Gastropoda	1.6	0.247	61	1.04858
8	94	1_x1.6_61mm_1.tif	Coris julis	0.163	Gastropoda	1.6	0.247	61	0.659919
9	94	1_x1.6_61mm_1.tif	Coris julis	0.149	Harpacticoida	1.6	0.247	61	0.603239
10	94	1_x1.6_61mm_1.tif	Coris julis	0.266	Harpacticoida	1.6	0.247	61	1.07692
11	94	1_x1.6_61mm_1.tif	Coris julis	0.079	Harpacticoida	1.6	0.247	61	0.319838
12	94	1_x1.6_61mm_1.tif	Coris julis	0.179	Harpacticoida	1.6	0.247	61	0.724696
2	95	10_x1.6_57mm_7.tif	Coris julis	0.439	Gastropoda	1.6	0.247	57	1.77733
3	95	10_x1.6_57mm_7.tif	Coris julis	0.286	Gastropoda	1.6	0.247	57	1.15789
4	95	10_x1.6_57mm_7.tif	Coris julis	0.278	Harpacticoida	1.6	0.247	57	1.12551
5	95	10_x1.6_57mm_7.tif	Coris julis	0.25	Harpacticoida	1.6	0.247	57	1.01215
6	95	10_x1.6_57mm_7.tif	Coris julis	0.269	Harpacticoida	1.6	0.247	57	1.08907
7	95	10_x1.6_57mm_7.tif	Coris julis	0.17	Harpacticoida	1.6	0.247	57	0.688259
1	95	10_x1.6_57mm_7.tif	Coris julis	0.839	Polychaeta	1.6	0.247	57	3.39676
1	96	2_x1.0_61mm_2.tif	Coris julis	0.11	Acari	1	0.153	61	0.718954
1	96	2_x1.0_61mm_2.tif	Coris julis	0.11	Polychaeta	1	0.153	61	0.718954
2	96	2_x1.0_61mm_2.tif	Coris julis	0.906	Polychaeta	1	0.153	61	5.92157
3	96	2_x1.0_61mm_2.tif	Coris julis	0.623	Polychaeta	1	0.153	61	4.0719
4	96	2_x1.0_61mm_2.tif	Coris julis	0.457	Polychaeta	1	0.153	61	2.98693
5	96	2_x1.0_61mm_2.tif	Coris julis	0.849	Polychaeta	1	0.153	61	5.54902
6	96	2_x1.0_61mm_2.tif	Coris julis	0.819	Polychaeta	1	0.153	61	5.35294
7	96	2_x1.0_61mm_2.tif	Coris julis	0.589	Polychaeta	1	0.153	61	3.84967
8	96	2_x1.0_61mm_2.tif	Coris julis	0.267	Polychaeta	1	0.153	61	1.7451
1	97	27_x1.6_45mm_17.tif	Coris julis	0.172	Gastropoda	1.6	0.247	45	0.696356
2	97	27_x1.6_45mm_17.tif	Coris julis	0.235	Gastropoda	1.6	0.247	45	0.951417
3	97	27_x1.6_45mm_17.tif	Coris julis	0.078	Gastropoda	1.6	0.247	45	0.315789
4	97	27_x1.6_45mm_17.tif	Coris julis	0.212	Gastropoda	1.6	0.247	45	0.8583
5	97	27_x1.6_45mm_17.tif	Coris julis	0.1	Harpacticoida	1.6	0.247	45	0.404858
6	97	27_x1.6_45mm_17.tif	Coris julis	0.147	Harpacticoida	1.6	0.247	45	0.595142
7	97	27_x1.6_45mm_17.tif	Coris julis	0.205	Harpacticoida	1.6	0.247	45	0.82996
8	97	27_x1.6_45mm_17.tif	Coris julis	0.201	Harpacticoida	1.6	0.247	45	0.813765
9	97	27_x1.6_45mm_17.tif	Coris julis	2.013	Polychaeta	1.6	0.247	45	8.1498
1	98	3_x1.6_61mm_2.tif	Coris julis	1.637	Polychaeta	1.6	0.247	61	6.62753
3	99	4_x1.0_56mm_3.tif	Coris julis	0.191	Gastropoda	1	0.153	56	1.24837
4	99	4_x1.0_56mm_3.tif	Coris julis	0.194	Gastropoda	1	0.153	56	1.26797
9	99	4_x1.0_56mm_3.tif	Coris julis	0.154	Gastropoda	1	0.153	56	1.00654
3	99	5_x1.6_47mm_4.tif	Coris julis	0.167	Gastropoda	1.6	0.247	47	0.676113
4	99	5_x1.6_47mm_4.tif	Coris julis	0.246	Gastropoda	1.6	0.247	47	0.995951
5	99	5_x1.6_47mm_4.tif	Coris julis	0.154	Gastropoda	1.6	0.247	47	0.623482
7	99	5_x1.6_47mm_4.tif	Coris julis	0.124	Gastropoda	1.6	0.247	47	0.502024
5	99	4_x1.0_56mm_3.tif	Coris julis	0.159	Harpacticoida	1	0.153	56	1.03922
6	99	4_x1.0_56mm_3.tif	Coris julis	0.149	Harpacticoida	1	0.153	56	0.973856
7	99	4_x1.0_56mm_3.tif	Coris julis	0.127	Harpacticoida	1	0.153	56	0.830065
8	99	4_x1.0_56mm_3.tif	Coris julis	0.174	Harpacticoida	1	0.153	56	1.13725
1	99	5_x1.6_47mm_4.tif	Coris julis	0.257	Harpacticoida	1.6	0.247	47	1.04049
2	99	5_x1.6_47mm_4.tif	Coris julis	0.264	Harpacticoida	1.6	0.247	47	1.06883
6	99	5_x1.6_47mm_4.tif	Coris julis	0.142	Harpacticoida	1.6	0.247	47	0.574899
8	99	5_x1.6_47mm_4.tif	Coris julis	0.278	Harpacticoida	1.6	0.247	47	1.12551
1	99	4_x1.0_56mm_3.tif	Coris julis	1.33	Polychaeta	1	0.153	56	8.69281
2	99	4_x1.0_56mm_3.tif	Coris julis	1.062	Polychaeta	1	0.153	56	6.94118
1	100	6_x3.2_52mm_5.tif	Coris julis	0.189	Foraminifera	3.2	0.494	52	0.382591
2	100	6_x3.2_52mm_5.tif	Coris julis	0.217	Foraminifera	3.2	0.494	52	0.439271
3	100	6_x3.2_52mm_5.tif	Coris julis	0.198	Foraminifera	3.2	0.494	52	0.40081
4	100	6_x3.2_52mm_5.tif	Coris julis	0.116	Foraminifera	3.2	0.494	52	0.234818
2	100	7_x2.0_52mm_5.tif	Coris julis	0.17	Foraminifera	2	0.31	52	0.548387
4	100	7_x2.0_52mm_5.tif	Coris julis	0.197	Foraminifera	2	0.31	52	0.635484
1	100	7_x2.0_52mm_5.tif	Coris julis	0.124	Gastropoda	2	0.31	52	0.4
3	100	7_x2.0_52mm_5.tif	Coris julis	0.194	Gastropoda	2	0.31	52	0.625806
5	100	7_x2.0_52mm_5.tif	Coris julis	0.122	Gastropoda	2	0.31	52	0.393548
6	100	7_x2.0_52mm_5.tif	Coris julis	0.189	Gastropoda	2	0.31	52	0.609677
7	100	7_x2.0_52mm_5.tif	Coris julis	0.414	Gastropoda	2	0.31	52	1.33548
8	100	7_x2.0_52mm_5.tif	Coris julis	0.133	Gastropoda	2	0.31	52	0.429032
12	101	8_x2.0_45mm_6.tif	Coris julis	0.176	Acari	2	0.31	45	0.567742
11	101	8_x2.0_45mm_6.tif	Coris julis	0.353	Amphipoda	2	0.31	45	1.13871
1	101	8_x2.0_45mm_6.tif	Coris julis	0.327	Harpacticoida	2	0.31	45	1.05484
2	101	8_x2.0_45mm_6.tif	Coris julis	0.258	Harpacticoida	2	0.31	45	0.832258
3	101	8_x2.0_45mm_6.tif	Coris julis	0.236	Harpacticoida	2	0.31	45	0.76129
4	101	8_x2.0_45mm_6.tif	Coris julis	0.246	Harpacticoida	2	0.31	45	0.793548
5	101	8_x2.0_45mm_6.tif	Coris julis	0.399	Harpacticoida	2	0.31	45	1.2871
6	101	8_x2.0_45mm_6.tif	Coris julis	0.25	Harpacticoida	2	0.31	45	0.806452
7	101	8_x2.0_45mm_6.tif	Coris julis	0.223	Harpacticoida	2	0.31	45	0.719355
8	101	8_x2.0_45mm_6.tif	Coris julis	0.301	Harpacticoida	2	0.31	45	0.970968
9	101	8_x2.0_45mm_6.tif	Coris julis	0.142	Harpacticoida	2	0.31	45	0.458065
10	101	8_x2.0_45mm_6.tif	Coris julis	0.345	Harpacticoida	2	0.31	45	1.1129
2	102	9_x1.6_57mm_7.tif	Coris julis	0.147	Foraminifera	1.6	0.247	57	0.595142
4	102	9_x1.6_57mm_7.tif	Coris julis	0.1	Foraminifera	1.6	0.247	57	0.404858
3	102	9_x1.6_57mm_7.tif	Coris julis	0.278	Gastropoda	1.6	0.247	57	1.12551
5	102	9_x1.6_57mm_7.tif	Coris julis	0.298	Harpacticoida	1.6	0.247	57	1.20648
1	102	9_x1.6_57mm_7.tif	Coris julis	0.776	Polychaeta	1.6	0.247	57	3.1417

## Sheet: Diplodus v.
Lno	FishID	Image	FishSp	Pixel	Taxa	Mag	cal	lengthf	lengthp
7	1	3_x1.6_35mm_1.tif	Diplodus vulgaris	0.639	Caprellidae	1.6	0.247	35	2.58704
8	1	3_x1.6_35mm_1.tif	Diplodus vulgaris	0.82	Caprellidae	1.6	0.247	35	3.31984
9	1	2_x2.0_35mm_1.tif	Diplodus vulgaris	0.165	Gastropoda	2	0.31	35	0.532258
10	1	2_x2.0_35mm_1.tif	Diplodus vulgaris	0.177	Gastropoda	2	0.31	35	0.570968
11	1	2_x2.0_35mm_1.tif	Diplodus vulgaris	0.309	Gastropoda	2	0.31	35	0.996774
1	1	1_x2.0_35mm_1.tif	Diplodus vulgaris	0.281	Harpacticoida	2	0.31	35	0.906452
2	1	1_x2.0_35mm_1.tif	Diplodus vulgaris	0.305	Harpacticoida	2	0.31	35	0.983871
3	1	1_x2.0_35mm_1.tif	Diplodus vulgaris	0.183	Harpacticoida	2	0.31	35	0.590323
1	1	2_x2.0_35mm_1.tif	Diplodus vulgaris	0.444	Harpacticoida	2	0.31	35	1.43226
2	1	2_x2.0_35mm_1.tif	Diplodus vulgaris	0.344	Harpacticoida	2	0.31	35	1.10968
3	1	2_x2.0_35mm_1.tif	Diplodus vulgaris	0.385	Harpacticoida	2	0.31	35	1.24194
4	1	2_x2.0_35mm_1.tif	Diplodus vulgaris	0.254	Harpacticoida	2	0.31	35	0.819355
5	1	2_x2.0_35mm_1.tif	Diplodus vulgaris	0.27	Harpacticoida	2	0.31	35	0.870968
14	1	2_x2.0_35mm_1.tif	Diplodus vulgaris	0.13	Harpacticoida	2	0.31	35	0.419355
1	1	3_x8.0_43mm_7.tif	Diplodus vulgaris	1.455	Harpacticoida	8	1.247	43	1.1668
1	1	3_x1.6_35mm_1.tif	Diplodus vulgaris	0.231	Harpacticoida	1.6	0.247	35	0.935223
2	1	3_x1.6_35mm_1.tif	Diplodus vulgaris	0.213	Harpacticoida	1.6	0.247	35	0.862348
3	1	3_x1.6_35mm_1.tif	Diplodus vulgaris	0.258	Harpacticoida	1.6	0.247	35	1.04453
4	1	3_x1.6_35mm_1.tif	Diplodus vulgaris	0.229	Harpacticoida	1.6	0.247	35	0.927126
5	1	3_x1.6_35mm_1.tif	Diplodus vulgaris	0.158	Harpacticoida	1.6	0.247	35	0.639676
6	1	3_x1.6_35mm_1.tif	Diplodus vulgaris	0.417	Harpacticoida	1.6	0.247	35	1.68826
8	1	2_x2.0_35mm_1.tif	Diplodus vulgaris	0.206	Ostracoda	2	0.31	35	0.664516
4	1	1_x2.0_35mm_1.tif	Diplodus vulgaris	0.847	Polychaeta	2	0.31	35	2.73226
5	1	1_x2.0_35mm_1.tif	Diplodus vulgaris	0.803	Polychaeta	2	0.31	35	2.59032
12	1	2_x2.0_35mm_1.tif	Diplodus vulgaris	1.017	Polychaeta	2	0.31	35	3.28065
6	1	2_x2.0_35mm_1.tif	Diplodus vulgaris	0.46	Tanaidacea	2	0.31	35	1.48387
7	1	2_x2.0_35mm_1.tif	Diplodus vulgaris	0.348	Tanaidacea	2	0.31	35	1.12258
13	1	2_x2.0_35mm_1.tif	Diplodus vulgaris	0.214	Unidentified	2	0.31	35	0.690323
1	2	4_x3.2_43mm_2.tif	Diplodus vulgaris	0.4	Harpacticoida	3.2	0.494	43	0.809717
1	2	6_x3.2_43mm_2.tif	Diplodus vulgaris	0.848	Harpacticoida	3.2	0.494	43	1.7166
5	3	7_x1.6_35mm_1.tif	Diplodus vulgaris	0.834	Caprellidae	1.6	0.247	35	3.37652
7	3	7_x1.6_35mm_1.tif	Diplodus vulgaris	0.765	Caprellidae	1.6	0.247	35	3.09717
4	3	7_x1.6_35mm_1.tif	Diplodus vulgaris	0.527	Cumacea	1.6	0.247	35	2.1336
1	3	7_x1.6_35mm_1.tif	Diplodus vulgaris	0.258	Harpacticoida	1.6	0.247	35	1.04453
2	3	7_x1.6_35mm_1.tif	Diplodus vulgaris	0.14	Harpacticoida	1.6	0.247	35	0.566802
3	3	7_x1.6_35mm_1.tif	Diplodus vulgaris	0.248	Harpacticoida	1.6	0.247	35	1.00405
1	3	9_x1.6_35mm_1.tif	Diplodus vulgaris	0.346	Harpacticoida	1.6	0.247	35	1.40081
2	3	9_x1.6_35mm_1.tif	Diplodus vulgaris	0.241	Harpacticoida	1.6	0.247	35	0.975709
3	3	9_x1.6_35mm_1.tif	Diplodus vulgaris	0.349	Harpacticoida	1.6	0.247	35	1.41296
4	3	9_x1.6_35mm_1.tif	Diplodus vulgaris	0.186	Harpacticoida	1.6	0.247	35	0.753036
5	3	9_x1.6_35mm_1.tif	Diplodus vulgaris	0.238	Harpacticoida	1.6	0.247	35	0.963563
7	3	9_x1.6_35mm_1.tif	Diplodus vulgaris	0.486	Polychaeta	1.6	0.247	35	1.96761
8	3	9_x1.6_35mm_1.tif	Diplodus vulgaris	0.477	Polychaeta	1.6	0.247	35	1.93117
9	3	9_x1.6_35mm_1.tif	Diplodus vulgaris	0.588	Polychaeta	1.6	0.247	35	2.38057
10	3	9_x1.6_35mm_1.tif	Diplodus vulgaris	0.324	Tanaidacea	1.6	0.247	35	1.31174
6	3	7_x1.6_35mm_1.tif	Diplodus vulgaris	0.169	Unidentified	1.6	0.247	35	0.684211
1	3	8_x5_35mm_1(from_Topleft_last_image).tif	Diplodus vulgaris	0.523	Unidentified	5	0.78	35	0.670513
6	3	9_x1.6_35mm_1.tif	Diplodus vulgaris	0.253	Zoe larvae	1.6	0.247	35	1.02429
1	4	10_x1.25_41mm_3.tif	Diplodus vulgaris	0.628	Isopoda	1.25	0.193	41	3.25389
7	5	11_x2.0_41mm_3.tif	Diplodus vulgaris	0.356	Amphipoda	2	0.31	41	1.14839
99	5	12_x1.6_41mm_3.tif	Diplodus vulgaris	1.227	Amphipoda	1.6	0.247	41	4.96761
4	5	13_x1.6_41mm_3.tif	Diplodus vulgaris	0.446	Amphipoda	1.6	0.247	41	1.80567
2	5	14_x3.2_41mm_3.tif	Diplodus vulgaris	0.428	Amphipoda	3.2	0.494	41	0.866397
9	5	13_x1.6_41mm_3.tif	Diplodus vulgaris	0.41	Caprellidae	1.6	0.247	41	1.65992
10	5	13_x1.6_41mm_3.tif	Diplodus vulgaris	0.459	Caprellidae	1.6	0.247	41	1.8583
11	5	11_x2.0_41mm_3.tif	Diplodus vulgaris	0.127	Foraminifera	2	0.31	41	0.409677
3	5	12_x1.6_41mm_3.tif	Diplodus vulgaris	0.164	Gastropoda	1.6	0.247	41	0.663968
1	5	10_x2.0_40mm_1.tif	Diplodus vulgaris	0.579	Harpacticoida	2	0.31	40	1.86774
2	5	10_x2.0_40mm_1.tif	Diplodus vulgaris	0.642	Harpacticoida	2	0.31	40	2.07097
1	5	11_x2.0_41mm_3.tif	Diplodus vulgaris	0.344	Harpacticoida	2	0.31	41	1.10968
2	5	11_x2.0_41mm_3.tif	Diplodus vulgaris	0.316	Harpacticoida	2	0.31	41	1.01935
3	5	11_x2.0_41mm_3.tif	Diplodus vulgaris	0.365	Harpacticoida	2	0.31	41	1.17742
4	5	11_x2.0_41mm_3.tif	Diplodus vulgaris	0.238	Harpacticoida	2	0.31	41	0.767742
5	5	11_x2.0_41mm_3.tif	Diplodus vulgaris	0.28	Harpacticoida	2	0.31	41	0.903226
6	5	11_x2.0_41mm_3.tif	Diplodus vulgaris	0.362	Harpacticoida	2	0.31	41	1.16774
10	5	11_x2.0_41mm_3.tif	Diplodus vulgaris	0.197	Harpacticoida	2	0.31	41	0.635484
1	5	12_x1.6_41mm_3.tif	Diplodus vulgaris	0.265	Harpacticoida	1.6	0.247	41	1.07287
2	5	12_x1.6_41mm_3.tif	Diplodus vulgaris	0.204	Harpacticoida	1.6	0.247	41	0.825911
1	5	13_x1.6_41mm_3.tif	Diplodus vulgaris	0.308	Harpacticoida	1.6	0.247	41	1.24696
2	5	13_x1.6_41mm_3.tif	Diplodus vulgaris	0.29	Harpacticoida	1.6	0.247	41	1.17409
3	5	13_x1.6_41mm_3.tif	Diplodus vulgaris	0.209	Harpacticoida	1.6	0.247	41	0.846154
7	5	13_x1.6_41mm_3.tif	Diplodus vulgaris	0.176	Harpacticoida	1.6	0.247	41	0.712551
1	5	14_x3.2_41mm_3.tif	Diplodus vulgaris	0.466	Harpacticoida	3.2	0.494	41	0.94332
99	5	12_x1.6_41mm_3.tif	Diplodus vulgaris	0.358	Polychaeta	1.6	0.247	41	1.44939
8	5	11_x2.0_41mm_3.tif	Diplodus vulgaris	0.333	Tanaidacea	2	0.31	41	1.07419
9	5	11_x2.0_41mm_3.tif	Diplodus vulgaris	0.393	Tanaidacea	2	0.31	41	1.26774
5	5	13_x1.6_41mm_3.tif	Diplodus vulgaris	0.53	Tanaidacea	1.6	0.247	41	2.14575
6	5	13_x1.6_41mm_3.tif	Diplodus vulgaris	0.216	Tanaidacea	1.6	0.247	41	0.874494
8	5	13_x1.6_41mm_3.tif	Diplodus vulgaris	0.517	Tanaidacea	1.6	0.247	41	2.09312
3	5	14_x3.2_41mm_3.tif	Diplodus vulgaris	0.703	Tanaidacea	3.2	0.494	41	1.42308
1	6	15_x.26_40mm_4.tif	Diplodus vulgaris	0.958	Amphipoda	1.6	0.247	40	3.87854
1	6	16_x2.5_40mm_4.tif	Diplodus vulgaris	0.744	Harpacticoida	2.5	0.39	40	1.90769
1	6	17_x3.2_40mm_4.tif	Diplodus vulgaris	0.613	Harpacticoida	3.2	0.494	40	1.24089
1	6	18_x6.2_40mm_4.tif	Diplodus vulgaris	1.143	Harpacticoida	6.2	0.78	40	1.46538
1	6	19_x6.2_40mm_4.tif	Diplodus vulgaris	1.308	Harpacticoida	6.2	0.78	40	1.67692
15	7	21_x1.6_44mm_5.tif	Diplodus vulgaris	0.13	Acari	1.6	0.247	44	0.526316
16	7	21_x1.6_44mm_5.tif	Diplodus vulgaris	0.151	Acari	1.6	0.247	44	0.611336
10	7	22_x0.71_44mm_5 .tif	Diplodus vulgaris	0.051	Acari	0.71	0.113	44	0.451327
21	7	21_x1.6_44mm_5.tif	Diplodus vulgaris	0.123	Foraminifera	1.6	0.247	44	0.497976
22	7	21_x1.6_44mm_5.tif	Diplodus vulgaris	0.097	Foraminifera	1.6	0.247	44	0.392713
23	7	21_x1.6_44mm_5.tif	Diplodus vulgaris	0.083	Foraminifera	1.6	0.247	44	0.336032
2	7	22_x0.71_44mm_5 .tif	Diplodus vulgaris	0.04	Foraminifera	0.71	0.113	44	0.353982
3	7	22_x0.71_44mm_5 .tif	Diplodus vulgaris	0.059	Foraminifera	0.71	0.113	44	0.522124
4	7	22_x0.71_44mm_5 .tif	Diplodus vulgaris	0.046	Foraminifera	0.71	0.113	44	0.40708
17	7	21_x1.6_44mm_5.tif	Diplodus vulgaris	0.196	Gastropoda	1.6	0.247	44	0.793522
18	7	21_x1.6_44mm_5.tif	Diplodus vulgaris	0.265	Gastropoda	1.6	0.247	44	1.07287
19	7	21_x1.6_44mm_5.tif	Diplodus vulgaris	0.173	Gastropoda	1.6	0.247	44	0.700405
1	7	22_x0.71_44mm_5 .tif	Diplodus vulgaris	0.111	Gastropoda	0.71	0.113	44	0.982301
1	7	21_x1.6_44mm_5.tif	Diplodus vulgaris	0.317	Harpacticoida	1.6	0.247	44	1.2834
2	7	21_x1.6_44mm_5.tif	Diplodus vulgaris	0.186	Harpacticoida	1.6	0.247	44	0.753036
3	7	21_x1.6_44mm_5.tif	Diplodus vulgaris	0.193	Harpacticoida	1.6	0.247	44	0.781377
4	7	21_x1.6_44mm_5.tif	Diplodus vulgaris	0.165	Harpacticoida	1.6	0.247	44	0.668016
5	7	21_x1.6_44mm_5.tif	Diplodus vulgaris	0.198	Harpacticoida	1.6	0.247	44	0.801619
6	7	21_x1.6_44mm_5.tif	Diplodus vulgaris	0.204	Harpacticoida	1.6	0.247	44	0.825911
7	7	21_x1.6_44mm_5.tif	Diplodus vulgaris	0.152	Harpacticoida	1.6	0.247	44	0.615385
8	7	21_x1.6_44mm_5.tif	Diplodus vulgaris	0.187	Harpacticoida	1.6	0.247	44	0.757085
9	7	21_x1.6_44mm_5.tif	Diplodus vulgaris	0.197	Harpacticoida	1.6	0.247	44	0.797571
10	7	21_x1.6_44mm_5.tif	Diplodus vulgaris	0.166	Harpacticoida	1.6	0.247	44	0.672065
11	7	21_x1.6_44mm_5.tif	Diplodus vulgaris	0.176	Harpacticoida	1.6	0.247	44	0.712551
12	7	21_x1.6_44mm_5.tif	Diplodus vulgaris	0.275	Harpacticoida	1.6	0.247	44	1.11336
13	7	21_x1.6_44mm_5.tif	Diplodus vulgaris	0.173	Harpacticoida	1.6	0.247	44	0.700405
14	7	21_x1.6_44mm_5.tif	Diplodus vulgaris	0.33	Harpacticoida	1.6	0.247	44	1.33603
20	7	21_x1.6_44mm_5.tif	Diplodus vulgaris	0.171	Harpacticoida	1.6	0.247	44	0.692308
5	7	22_x0.71_44mm_5 .tif	Diplodus vulgaris	0.096	Harpacticoida	0.71	0.113	44	0.849558
6	7	22_x0.71_44mm_5 .tif	Diplodus vulgaris	0.169	Harpacticoida	0.71	0.113	44	1.49558
7	7	22_x0.71_44mm_5 .tif	Diplodus vulgaris	0.101	Harpacticoida	0.71	0.113	44	0.893805
8	7	22_x0.71_44mm_5 .tif	Diplodus vulgaris	0.088	Harpacticoida	0.71	0.113	44	0.778761
9	7	22_x0.71_44mm_5 .tif	Diplodus vulgaris	0.061	Harpacticoida	0.71	0.113	44	0.539823
1	8	23_x0.71_45mm_6.tif	Diplodus vulgaris	0.138	Harpacticoida	0.71	0.113	45	1.22124
2	8	23_x0.71_45mm_6.tif	Diplodus vulgaris	0.142	Harpacticoida	0.71	0.113	45	1.25664
22	9	26_x2.0_44mm_5.tif	Diplodus vulgaris	0.2	Acari	2	0.31	44	0.645161
23	9	26_x2.0_44mm_5.tif	Diplodus vulgaris	0.2	Acari	2	0.31	44	0.645161
24	9	26_x2.0_44mm_5.tif	Diplodus vulgaris	0.198	Acari	2	0.31	44	0.63871
17	9	27_x2.0_44mm_5.tif	Diplodus vulgaris	0.152	Acari	2	0.31	44	0.490323
18	9	27_x2.0_44mm_5.tif	Diplodus vulgaris	0.187	Acari	2	0.31	44	0.603226
19	9	27_x2.0_44mm_5.tif	Diplodus vulgaris	0.187	Acari	2	0.31	44	0.603226
20	9	27_x2.0_44mm_5.tif	Diplodus vulgaris	0.134	Acari	2	0.31	44	0.432258
23	9	27_x2.0_44mm_5.tif	Diplodus vulgaris	1.064	Caprellidae	2	0.31	44	3.43226
25	9	26_x2.0_44mm_5.tif	Diplodus vulgaris	0.112	Foraminifera	2	0.31	44	0.36129
26	9	26_x2.0_44mm_5.tif	Diplodus vulgaris	0.097	Foraminifera	2	0.31	44	0.312903
27	9	26_x2.0_44mm_5.tif	Diplodus vulgaris	0.111	Foraminifera	2	0.31	44	0.358065
1	9	27_x2.0_44mm_5.tif	Diplodus vulgaris	0.174	Foraminifera	2	0.31	44	0.56129
2	9	27_x2.0_44mm_5.tif	Diplodus vulgaris	0.207	Foraminifera	2	0.31	44	0.667742
3	9	27_x2.0_44mm_5.tif	Diplodus vulgaris	0.224	Foraminifera	2	0.31	44	0.722581
22	9	27_x2.0_44mm_5.tif	Diplodus vulgaris	0.152	Foraminifera	2	0.31	44	0.490323
28	9	26_x2.0_44mm_5.tif	Diplodus vulgaris	0.254	Gastropoda	2	0.31	44	0.819355
29	9	26_x2.0_44mm_5.tif	Diplodus vulgaris	0.169	Gastropoda	2	0.31	44	0.545161
21	9	27_x2.0_44mm_5.tif	Diplodus vulgaris	0.303	Gastropoda	2	0.31	44	0.977419
1	9	26_x2.0_44mm_5.tif	Diplodus vulgaris	0.393	Harpacticoida	2	0.31	44	1.26774
2	9	26_x2.0_44mm_5.tif	Diplodus vulgaris	0.241	Harpacticoida	2	0.31	44	0.777419
3	9	26_x2.0_44mm_5.tif	Diplodus vulgaris	0.398	Harpacticoida	2	0.31	44	1.28387
4	9	26_x2.0_44mm_5.tif	Diplodus vulgaris	0.249	Harpacticoida	2	0.31	44	0.803226
5	9	26_x2.0_44mm_5.tif	Diplodus vulgaris	0.356	Harpacticoida	2	0.31	44	1.14839
6	9	26_x2.0_44mm_5.tif	Diplodus vulgaris	0.21	Harpacticoida	2	0.31	44	0.677419
7	9	26_x2.0_44mm_5.tif	Diplodus vulgaris	0.355	Harpacticoida	2	0.31	44	1.14516
8	9	26_x2.0_44mm_5.tif	Diplodus vulgaris	0.188	Harpacticoida	2	0.31	44	0.606452
9	9	26_x2.0_44mm_5.tif	Diplodus vulgaris	0.219	Harpacticoida	2	0.31	44	0.706452
10	9	26_x2.0_44mm_5.tif	Diplodus vulgaris	0.23	Harpacticoida	2	0.31	44	0.741935
11	9	26_x2.0_44mm_5.tif	Diplodus vulgaris	0.337	Harpacticoida	2	0.31	44	1.0871
12	9	26_x2.0_44mm_5.tif	Diplodus vulgaris	0.155	Harpacticoida	2	0.31	44	0.5
13	9	26_x2.0_44mm_5.tif	Diplodus vulgaris	0.233	Harpacticoida	2	0.31	44	0.751613
14	9	26_x2.0_44mm_5.tif	Diplodus vulgaris	0.417	Harpacticoida	2	0.31	44	1.34516
15	9	26_x2.0_44mm_5.tif	Diplodus vulgaris	0.374	Harpacticoida	2	0.31	44	1.20645
16	9	26_x2.0_44mm_5.tif	Diplodus vulgaris	0.22	Harpacticoida	2	0.31	44	0.709677
17	9	26_x2.0_44mm_5.tif	Diplodus vulgaris	0.164	Harpacticoida	2	0.31	44	0.529032
18	9	26_x2.0_44mm_5.tif	Diplodus vulgaris	0.189	Harpacticoida	2	0.31	44	0.609677
19	9	26_x2.0_44mm_5.tif	Diplodus vulgaris	0.192	Harpacticoida	2	0.31	44	0.619355
20	9	26_x2.0_44mm_5.tif	Diplodus vulgaris	0.156	Harpacticoida	2	0.31	44	0.503226
21	9	26_x2.0_44mm_5.tif	Diplodus vulgaris	0.11	Harpacticoida	2	0.31	44	0.354839
4	9	27_x2.0_44mm_5.tif	Diplodus vulgaris	0.354	Harpacticoida	2	0.31	44	1.14194
5	9	27_x2.0_44mm_5.tif	Diplodus vulgaris	0.374	Harpacticoida	2	0.31	44	1.20645
6	9	27_x2.0_44mm_5.tif	Diplodus vulgaris	0.312	Harpacticoida	2	0.31	44	1.00645
7	9	27_x2.0_44mm_5.tif	Diplodus vulgaris	0.348	Harpacticoida	2	0.31	44	1.12258
8	9	27_x2.0_44mm_5.tif	Diplodus vulgaris	0.18	Harpacticoida	2	0.31	44	0.580645
9	9	27_x2.0_44mm_5.tif	Diplodus vulgaris	0.184	Harpacticoida	2	0.31	44	0.593548
10	9	27_x2.0_44mm_5.tif	Diplodus vulgaris	0.211	Harpacticoida	2	0.31	44	0.680645
11	9	27_x2.0_44mm_5.tif	Diplodus vulgaris	0.403	Harpacticoida	2	0.31	44	1.3
12	9	27_x2.0_44mm_5.tif	Diplodus vulgaris	0.211	Harpacticoida	2	0.31	44	0.680645
13	9	27_x2.0_44mm_5.tif	Diplodus vulgaris	0.371	Harpacticoida	2	0.31	44	1.19677
14	9	27_x2.0_44mm_5.tif	Diplodus vulgaris	0.272	Harpacticoida	2	0.31	44	0.877419
15	9	27_x2.0_44mm_5.tif	Diplodus vulgaris	0.315	Harpacticoida	2	0.31	44	1.01613
16	9	27_x2.0_44mm_5.tif	Diplodus vulgaris	0.296	Harpacticoida	2	0.31	44	0.954839
30	10	26_x2.0_44mm_5.tif	Diplodus vulgaris	0.658	Cumacea	2	0.31	44	2.12258
1	10	28_x1.6_35mm_8.tif	Diplodus vulgaris	0.237	Harpacticoida	1.6	0.247	35	0.959514
1	10	29_x2.5_35mm_8.tif	Diplodus vulgaris	0.546	Harpacticoida	2.5	0.39	35	1.4
2	10	29_x2.5_35mm_8.tif	Diplodus vulgaris	0.425	Harpacticoida	2.5	0.39	35	1.08974
3	10	29_x2.5_35mm_8.tif	Diplodus vulgaris	0.211	Harpacticoida	2.5	0.39	35	0.541026
4	10	29_x2.5_35mm_8.tif	Diplodus vulgaris	0.478	Harpacticoida	2.5	0.39	35	1.22564
5	10	29_x2.5_35mm_8.tif	Diplodus vulgaris	0.549	Harpacticoida	2.5	0.39	35	1.40769
2	10	28_x1.6_35mm_8.tif	Diplodus vulgaris	0.113	Ostracoda	1.6	0.247	35	0.45749
1	11	32_x2.5_43mm_7.tif	Diplodus vulgaris	0.509	Bivalvia	2.5	0.39	43	1.30513
6	11	30_x1.6_43mm_7.tif	Diplodus vulgaris	0.243	Gastropoda	1.6	0.247	43	0.983806
7	11	30_x1.6_43mm_7.tif	Diplodus vulgaris	0.143	Gastropoda	1.6	0.247	43	0.578947
1	11	30_x1.6_43mm_7.tif	Diplodus vulgaris	0.426	Harpacticoida	1.6	0.247	43	1.7247
2	11	30_x1.6_43mm_7.tif	Diplodus vulgaris	0.398	Harpacticoida	1.6	0.247	43	1.61134
3	11	30_x1.6_43mm_7.tif	Diplodus vulgaris	0.198	Harpacticoida	1.6	0.247	43	0.801619
4	11	30_x1.6_43mm_7.tif	Diplodus vulgaris	0.287	Harpacticoida	1.6	0.247	43	1.16194
5	11	30_x1.6_43mm_7.tif	Diplodus vulgaris	0.174	Harpacticoida	1.6	0.247	43	0.704453
1	11	31_x1.6_43mm_8.tif	Diplodus vulgaris	0.288	Harpacticoida	1.6	0.247	43	1.16599
2	11	31_x1.6_43mm_8.tif	Diplodus vulgaris	0.286	Harpacticoida	1.6	0.247	43	1.15789
1	11	35_x8.0_43mm_7.tif	Diplodus vulgaris	1.366	Harpacticoida	8	1.247	43	1.09543
1	11	37_x5.0_43mm_7.tif	Diplodus vulgaris	0.747	Harpacticoida	5	0.78	43	0.957692
1	11	38_x8.0_43mm_7.tif	Diplodus vulgaris	0.852	Harpacticoida	8	1.247	43	0.68324
8	11	30_x1.6_43mm_7.tif	Diplodus vulgaris	1.073	Polychaeta	1.6	0.247	43	4.34413
2	12	39_x3.2_42mm_9.tif	Diplodus vulgaris	0.245	Amphipoda	3.2	0.494	42	0.495951
5	12	39_x3.2_42mm_9.tif	Diplodus vulgaris	1.265	Caprellidae	3.2	0.494	42	2.56073
4	12	39_x3.2_42mm_9.tif	Diplodus vulgaris	0.181	Foraminifera	3.2	0.494	42	0.366397
1	12	39_x3.2_42mm_9.tif	Diplodus vulgaris	0.416	Harpacticoida	3.2	0.494	42	0.842105
3	12	39_x3.2_42mm_9.tif	Diplodus vulgaris	0.409	Harpacticoida	3.2	0.494	42	0.827935
1	12	40_x1.6_42mm_9.tif	Diplodus vulgaris	0.197	Harpacticoida	1.6	0.247	42	0.797571
2	12	40_x1.6_42mm_9.tif	Diplodus vulgaris	0.229	Harpacticoida	1.6	0.247	42	0.927126
3	12	40_x1.6_42mm_9.tif	Diplodus vulgaris	0.329	Harpacticoida	1.6	0.247	42	1.33198
4	12	40_x1.6_42mm_9.tif	Diplodus vulgaris	1.109	Polychaeta	1.6	0.247	42	4.48988
5	12	40_x1.6_42mm_9.tif	Diplodus vulgaris	0.475	Polychaeta	1.6	0.247	42	1.92308
6	12	40_x1.6_42mm_9.tif	Diplodus vulgaris	0.485	Tanaidacea	1.6	0.247	42	1.96356
1	13	41_x8.0_44mm_10.tif	Diplodus vulgaris	0.746	Acari	8	1.247	44	0.598236
1	14	42.5_x1.25_43mm_10.tif	Diplodus vulgaris	0.236	Harpacticoida	1.25	0.193	43	1.2228
1	15	43_x4.0_44mm_10.tif	Diplodus vulgaris	0.381	Gastropoda	4	0.617	44	0.617504
1	15	44_x5.0_44mm_10.tif	Diplodus vulgaris	1.059	Isopoda	5	0.78	44	1.35769
1	15	42_x1.6_44mm_10.tif	Diplodus vulgaris	0.196	Unidentified	1.6	0.247	44	0.793522
4	16	45_x3.2_42mm_9.tif	Diplodus vulgaris	0.362	Amphipoda	3.2	0.494	42	0.732794
2	16	46_x3.2_42mm_9.tif	Diplodus vulgaris	0.534	Amphipoda	3.2	0.494	42	1.08097
1	16	46_x3.2_42mm_9.tif	Diplodus vulgaris	1.119	Caprellidae	3.2	0.494	42	2.26518
1	16	45_x3.2_42mm_9.tif	Diplodus vulgaris	0.626	Harpacticoida	3.2	0.494	42	1.26721
2	16	45_x3.2_42mm_9.tif	Diplodus vulgaris	0.516	Harpacticoida	3.2	0.494	42	1.04453
3	16	45_x3.2_42mm_9.tif	Diplodus vulgaris	0.344	Harpacticoida	3.2	0.494	42	0.696356
1	17	S7_50mm(40)_x1.00_1.tif	Diplodus vulgaris	0.092	Ostracoda	1	0.153	40	0.601307
2	17	S7_50mm(40)_x1.00_1.tif	Diplodus vulgaris	0.092	Ostracoda	1	0.153	40	0.601307
3	17	S7_50mm(40)_x1.00_1.tif	Diplodus vulgaris	0.115	Ostracoda	1	0.153	40	0.751634
4	17	S7_50mm(40)_x1.00_1.tif	Diplodus vulgaris	0.093	Ostracoda	1	0.153	40	0.607843
5	17	S7_50mm(40)_x1.00_1.tif	Diplodus vulgaris	0.078	Ostracoda	1	0.153	40	0.509804
6	17	S7_50mm(40)_x1.00_1.tif	Diplodus vulgaris	0.109	Ostracoda	1	0.153	40	0.712418
7	17	S7_50mm(40)_x1.00_1.tif	Diplodus vulgaris	0.073	Ostracoda	1	0.153	40	0.477124
8	17	S7_50mm(40)_x1.00_1.tif	Diplodus vulgaris	0.114	Ostracoda	1	0.153	40	0.745098
9	17	S7_50mm(40)_x1.00_1.tif	Diplodus vulgaris	0.076	Ostracoda	1	0.153	40	0.496732
10	17	S7_50mm(40)_x1.00_1.tif	Diplodus vulgaris	0.411	Polychaeta	1	0.153	40	2.68627
11	17	S7_50mm(40)_x1.00_1.tif	Diplodus vulgaris	0.297	Harpacticoida	1	0.153	40	1.94118
12	17	S7_50mm(40)_x1.00_1.tif	Diplodus vulgaris	0.117	Harpacticoida	1	0.153	40	0.764706
13	17	S7_50mm(40)_x1.00_1.tif	Diplodus vulgaris	0.107	Harpacticoida	1	0.153	40	0.699346
1	18	St2_1_39mm_x2.5.tif	Diplodus vulgaris	0.245	Ostracoda	2.5	0.39	39	0.628205
2	18	St2_1_39mm_x2.5.tif	Diplodus vulgaris	0.29	Ostracoda	2.5	0.39	39	0.74359
3	18	St2_1_39mm_x2.5.tif	Diplodus vulgaris	0.246	Ostracoda	2.5	0.39	39	0.630769
4	18	St2_1_39mm_x2.5.tif	Diplodus vulgaris	0.276	Ostracoda	2.5	0.39	39	0.707692
5	18	St2_1_39mm_x2.5.tif	Diplodus vulgaris	0.35	Gastropoda	2.5	0.39	39	0.897436
6	18	St2_1_39mm_x2.5.tif	Diplodus vulgaris	0.368	Gastropoda	2.5	0.39	39	0.94359
7	18	St2_1_39mm_x2.5.tif	Diplodus vulgaris	0.353	Gastropoda	2.5	0.39	39	0.905128
8	18	St2_1_39mm_x2.5.tif	Diplodus vulgaris	0.295	Gastropoda	2.5	0.39	39	0.75641
1	19	St2_2_39mm_x2.5.tif	Diplodus vulgaris	0.441	Amphipoda	2.5	0.39	39	1.13077
2	19	St2_2_39mm_x2.5.tif	Diplodus vulgaris	0.347	Harpacticoida	2.5	0.39	39	0.889744
3	19	St2_2_39mm_x2.5.tif	Diplodus vulgaris	0.247	Harpacticoida	2.5	0.39	39	0.633333
4	20	St2_3_38mm_x1.6.tif	Diplodus vulgaris	0.178	Ostracoda	1.6	0.247	38	0.720648
5	20	St2_3_38mm_x1.6.tif	Diplodus vulgaris	0.161	Ostracoda	1.6	0.247	38	0.651822
6	20	St2_3_38mm_x1.6.tif	Diplodus vulgaris	0.204	Ostracoda	1.6	0.247	38	0.825911
7	20	St2_3_38mm_x1.6.tif	Diplodus vulgaris	0.169	Ostracoda	1.6	0.247	38	0.684211
8	20	St2_3_38mm_x1.6.tif	Diplodus vulgaris	0.174	Ostracoda	1.6	0.247	38	0.704453
9	20	St2_3_38mm_x1.6.tif	Diplodus vulgaris	0.178	Ostracoda	1.6	0.247	38	0.720648
10	20	St2_3_38mm_x1.6.tif	Diplodus vulgaris	0.137	Ostracoda	1.6	0.247	38	0.554656
11	20	St2_3_38mm_x1.6.tif	Diplodus vulgaris	0.152	Ostracoda	1.6	0.247	38	0.615385
12	20	St2_3_38mm_x1.6.tif	Diplodus vulgaris	0.185	Ostracoda	1.6	0.247	38	0.748988
13	20	St2_3_38mm_x1.6.tif	Diplodus vulgaris	0.124	Foraminifera	1.6	0.247	38	0.502024
14	20	St2_4_38mm_x1.25.tif	Diplodus vulgaris	0.914	Caprellidae	1.25	0.193	38	4.73575
15	20	St2_4_38mm_x1.25.tif	Diplodus vulgaris	0.513	Caprellidae	1.25	0.193	38	2.65803
16	20	St2_4_38mm_x1.25.tif	Diplodus vulgaris	0.336	Amphipoda	1.25	0.193	38	1.74093
17	20	St2_4_38mm_x1.25.tif	Diplodus vulgaris	0.166	Gastropoda	1.25	0.193	38	0.860104
1	21	St2_4_27mm_x3.2.tif	Diplodus vulgaris	0.33	Harpacticoida	3.2	0.494	27	0.668016
2	21	St2_4_27mm_x3.2.tif	Diplodus vulgaris	0.249	Harpacticoida	3.2	0.494	27	0.504049
3	21	St2_4_27mm_x3.2.tif	Diplodus vulgaris	0.197	Harpacticoida	3.2	0.494	27	0.398785
4	21	St2_4_27mm_x3.2.tif	Diplodus vulgaris	0.303	Harpacticoida	3.2	0.494	27	0.61336
5	21	St2_4_27mm_x3.2.tif	Diplodus vulgaris	0.307	Harpacticoida	3.2	0.494	27	0.621457
6	21	St2_4_27mm_x3.2.tif	Diplodus vulgaris	0.295	Harpacticoida	3.2	0.494	27	0.597166
7	21	St2_4_27mm_x3.2.tif	Diplodus vulgaris	0.263	Harpacticoida	3.2	0.494	27	0.532389
8	21	St2_4_27mm_x3.2.tif	Diplodus vulgaris	0.485	Harpacticoida	3.2	0.494	27	0.981781
9	21	St2_4_27mm_x3.2.tif	Diplodus vulgaris	0.356	Harpacticoida	3.2	0.494	27	0.720648
10	21	St2_4_27mm_x3.2.tif	Diplodus vulgaris	0.516	Harpacticoida	3.2	0.494	27	1.04453
11	21	St2_4_27mm_x3.2.tif	Diplodus vulgaris	0.795	Polychaeta	3.2	0.494	27	1.60931
1	22	St2_5_39mm_x2.5.tif	Diplodus vulgaris	0.265	Ostracoda	2.5	0.39	39	0.679487
2	22	St2_5_39mm_x2.5.tif	Diplodus vulgaris	0.285	Ostracoda	2.5	0.39	39	0.730769
3	22	St2_5_39mm_x2.5.tif	Diplodus vulgaris	0.236	Ostracoda	2.5	0.39	39	0.605128
4	22	St2_5_39mm_x2.5.tif	Diplodus vulgaris	0.14	Gastropoda	2.5	0.39	39	0.358974
5	22	St2_5_39mm_x2.5.tif	Diplodus vulgaris	0.313	Gastropoda	2.5	0.39	39	0.802564
1	23	St2_6_39mm_x1.6.tif	Diplodus vulgaris	0.544	Amphipoda	1.6	0.247	39	2.20243
2	23	St2_6_39mm_x1.6.tif	Diplodus vulgaris	0.414	Caprellidae	1.6	0.247	39	1.67611
3	23	St2_6_39mm_x1.6.tif	Diplodus vulgaris	0.47	Caprellidae	1.6	0.247	39	1.90283
1	24	St7_42mm(33)_x1.tif	Diplodus vulgaris	0.233	Harpacticoida	1	0.153	33	1.52288
2	24	St7_42mm(33)_x1.tif	Diplodus vulgaris	0.246	Harpacticoida	1	0.153	33	1.60784
3	24	St7_42mm(33)_x1.tif	Diplodus vulgaris	0.13	Harpacticoida	1	0.153	33	0.849673
4	24	St7_42mm(33)_x1.tif	Diplodus vulgaris	0.104	Harpacticoida	1	0.153	33	0.679739
5	24	St7_42mm(33)_x1.tif	Diplodus vulgaris	0.102	Harpacticoida	1	0.153	33	0.666667
6	24	St7_42mm(33)_x1.tif	Diplodus vulgaris	0.107	Harpacticoida	1	0.153	33	0.699346
7	24	St7_42mm(33)_x1.tif	Diplodus vulgaris	0.111	Harpacticoida	1	0.153	33	0.72549
8	24	St7_42mm(33)_x1.tif	Diplodus vulgaris	0.238	Harpacticoida	1	0.153	33	1.55556
9	24	St7_42mm(33)_x1.tif	Diplodus vulgaris	0.111	Harpacticoida	1	0.153	33	0.72549
10	24	St7_42mm(33)_x1.tif	Diplodus vulgaris	0.145	Harpacticoida	1	0.153	33	0.947712
11	24	St7_42mm(33)_x1.tif	Diplodus vulgaris	0.077	Harpacticoida	1	0.153	33	0.503268
12	24	St7_42mm(33)_x1.tif	Diplodus vulgaris	0.4	Natantia	1	0.153	33	2.61438
1	25	St7_42mm(34)_x2.0.tif	Diplodus vulgaris	0.361	Unknown	2	0.31	34	1.16452
2	25	St7_42mm(34)_x2.0.tif	Diplodus vulgaris	0.177	Ostracoda	2	0.31	34	0.570968
3	25	St7_42mm(34)_x2.0.tif	Diplodus vulgaris	0.195	Harpacticoida	2	0.31	34	0.629032
4	25	St7_42mm(34)_x2.0.tif	Diplodus vulgaris	0.196	Harpacticoida	2	0.31	34	0.632258
5	25	St7_42mm(34)_x2.0.tif	Diplodus vulgaris	0.161	Harpacticoida	2	0.31	34	0.519355
6	25	St7_42mm(34)_x2.0.tif	Diplodus vulgaris	0.186	Harpacticoida	2	0.31	34	0.6
7	25	St7_42mm(34)_x2.0.tif	Diplodus vulgaris	0.161	Harpacticoida	2	0.31	34	0.519355
8	25	St7_42mm(34)_x2.0.tif	Diplodus vulgaris	0.351	Unknown	2	0.31	34	1.13226
9	25	St7_42mm(34)_x2.0.tif	Diplodus vulgaris	0.121	Harpacticoida	2	0.31	34	0.390323
1	26	St7_46mm(36)_x1.25.tif	Diplodus vulgaris	0.295	Harpacticoida	1.25	0.193	36	1.5285
2	26	St7_46mm(36)_x1.25.tif	Diplodus vulgaris	0.17	Harpacticoida	1.25	0.193	36	0.880829
3	26	St7_46mm(36)_x1.25.tif	Diplodus vulgaris	0.219	Harpacticoida	1.25	0.193	36	1.13472
4	26	St7_46mm(36)_x1.25.tif	Diplodus vulgaris	0.151	Harpacticoida	1.25	0.193	36	0.782383
5	26	St7_46mm(36)_x1.25.tif	Diplodus vulgaris	0.185	Harpacticoida	1.25	0.193	36	0.958549
6	26	St7_46mm(36)_x1.25.tif	Diplodus vulgaris	0.108	Harpacticoida	1.25	0.193	36	0.559585
7	26	St7_46mm(36)_x1.25.tif	Diplodus vulgaris	0.17	Harpacticoida	1.25	0.193	36	0.880829
8	26	St7_46mm(36)_x1.25.tif	Diplodus vulgaris	0.163	Harpacticoida	1.25	0.193	36	0.84456
9	26	St7_46mm(36)_x1.25.tif	Diplodus vulgaris	0.099	Harpacticoida	1.25	0.193	36	0.512953
10	26	St7_46mm(36)_x1.25.tif	Diplodus vulgaris	0.079	Harpacticoida	1.25	0.193	36	0.409326
11	26	St7_46mm(36)_x1.25.tif	Diplodus vulgaris	0.125	Harpacticoida	1.25	0.193	36	0.647668
12	26	St7_46mm(36)_x1.25.tif	Diplodus vulgaris	0.123	Harpacticoida	1.25	0.193	36	0.637306
13	26	St7_46mm(36)_x1.25.tif	Diplodus vulgaris	0.128	Ostracoda	1.25	0.193	36	0.663212
14	26	St7_46mm(36)_x1.25.tif	Diplodus vulgaris	0.122	Ostracoda	1.25	0.193	36	0.632124
15	26	St7_46mm(36)_x1.25.tif	Diplodus vulgaris	0.143	Ostracoda	1.25	0.193	36	0.740933
16	26	St7_46mm(36)_x1.25.tif	Diplodus vulgaris	0.093	Ostracoda	1.25	0.193	36	0.481865
17	26	St7_46mm(36)_x1.25.tif	Diplodus vulgaris	0.105	Ostracoda	1.25	0.193	36	0.544041
1	27	St7_46mm(37)_x1.6.tif	Diplodus vulgaris	0.233	Harpacticoida	1.6	0.247	37	0.94332
2	27	St7_46mm(37)_x1.6.tif	Diplodus vulgaris	0.308	Harpacticoida	1.6	0.247	37	1.24696
3	27	St7_46mm(37)_x1.6.tif	Diplodus vulgaris	0.31	Harpacticoida	1.6	0.247	37	1.25506
4	27	St7_46mm(37)_x1.6.tif	Diplodus vulgaris	0.234	Harpacticoida	1.6	0.247	37	0.947368
5	27	St7_46mm(37)_x1.6.tif	Diplodus vulgaris	0.25	Harpacticoida	1.6	0.247	37	1.01215
1	28	St7_47mm(38)_x1.6.tif	Diplodus vulgaris	0.26	Harpacticoida	1.6	0.247	38	1.05263
2	28	St7_47mm(38)_x1.6.tif	Diplodus vulgaris	0.14	Harpacticoida	1.6	0.247	38	0.566802
3	28	St7_47mm(38)_x1.6.tif	Diplodus vulgaris	0.217	Harpacticoida	1.6	0.247	38	0.878543
4	28	St7_47mm(38)_x1.6.tif	Diplodus vulgaris	0.163	Harpacticoida	1.6	0.247	38	0.659919
5	28	St7_47mm(38)_x1.6.tif	Diplodus vulgaris	0.213	Harpacticoida	1.6	0.247	38	0.862348
6	28	St7_47mm(38)_x1.6.tif	Diplodus vulgaris	0.252	Harpacticoida	1.6	0.247	38	1.02024
7	28	St7_47mm(38)_x1.6.tif	Diplodus vulgaris	0.295	Harpacticoida	1.6	0.247	38	1.19433
8	28	St7_47mm(38)_x1.6.tif	Diplodus vulgaris	0.386	Isopoda	1.6	0.247	38	1.56275
9	28	St7_47mm(38)_x1.6.tif	Diplodus vulgaris	0.539	Caprellidae	1.6	0.247	38	2.18219
1	29	St7_50mm(41)_x2_1.tif	Diplodus vulgaris	0.214	Harpacticoida	2	0.31	41	0.690323
2	29	St7_50mm(41)_x2_1.tif	Diplodus vulgaris	0.147	Harpacticoida	2	0.31	41	0.474194
3	29	St7_50mm(41)_x2_1.tif	Diplodus vulgaris	0.273	Harpacticoida	2	0.31	41	0.880645
4	29	St7_50mm(41)_x2_1.tif	Diplodus vulgaris	0.135	Harpacticoida	2	0.31	41	0.435484
5	29	St7_50mm(41)_x2_1.tif	Diplodus vulgaris	0.276	Harpacticoida	2	0.31	41	0.890323
6	29	St7_50mm(41)_x2_1.tif	Diplodus vulgaris	0.186	Harpacticoida	2	0.31	41	0.6
7	29	St7_50mm(41)_x2_1.tif	Diplodus vulgaris	0.16	Harpacticoida	2	0.31	41	0.516129
8	29	St7_50mm(41)_x2_1.tif	Diplodus vulgaris	0.17	Harpacticoida	2	0.31	41	0.548387
9	29	St7_50mm(41)_x2_1.tif	Diplodus vulgaris	0.433	Amphipoda	2	0.31	41	1.39677
10	29	St7_50mm(41)_x2_1.tif	Diplodus vulgaris	0.437	Cumacea	2	0.31	41	1.40968
11	29	St7_50mm(41)_x2_1.tif	Diplodus vulgaris	0.184	Amphipoda	2	0.31	41	0.593548
12	29	St7_50mm(41)_x2_1.tif	Diplodus vulgaris	0.164	Amphipoda	2	0.31	41	0.529032
13	29	St7_50mm(41)_x2_1.tif	Diplodus vulgaris	0.268	Amphipoda	2	0.31	41	0.864516
1	30	St12_36mmcl_x1.25.tif	Diplodus vulgaris	0.123	Ostracoda	1.25	0.193	36	0.637306
2	30	St12_36mmcl_x1.25.tif	Diplodus vulgaris	0.135	Ostracoda	1.25	0.193	36	0.699482
3	30	St12_36mmcl_x1.25.tif	Diplodus vulgaris	0.12	Ostracoda	1.25	0.193	36	0.621762
4	30	St12_36mmcl_x1.25.tif	Diplodus vulgaris	0.167	Ostracoda	1.25	0.193	36	0.865285
5	30	St12_36mmcl_x1.25.tif	Diplodus vulgaris	0.159	Gastropoda	1.25	0.193	36	0.823834
6	30	St12_36mmcl_x1.25.tif	Diplodus vulgaris	0.164	Gastropoda	1.25	0.193	36	0.849741
7	30	St12_36mmcl_x1.25.tif	Diplodus vulgaris	0.19	Gastropoda	1.25	0.193	36	0.984456
1	31	St12_38mm_x1.25.tif	Diplodus vulgaris	0.228	Gastropoda	1.25	0.193	38	1.18135
2	31	St12_38mm_x1.25.tif	Diplodus vulgaris	0.209	Gastropoda	1.25	0.193	38	1.0829
3	31	St12_38mm_x1.25.tif	Diplodus vulgaris	0.138	Ostracoda	1.25	0.193	38	0.715026
4	31	St12_38mm_x1.25.tif	Diplodus vulgaris	0.104	Ostracoda	1.25	0.193	38	0.53886
5	31	St12_38mm_x1.25.tif	Diplodus vulgaris	0.129	Ostracoda	1.25	0.193	38	0.668394
6	31	St12_38mm_x1.25.tif	Diplodus vulgaris	0.117	Ostracoda	1.25	0.193	38	0.606218
7	31	St12_38mm_x1.25.tif	Diplodus vulgaris	0.123	Ostracoda	1.25	0.193	38	0.637306
8	31	St12_38mm_x1.25.tif	Diplodus vulgaris	0.127	Ostracoda	1.25	0.193	38	0.658031
9	31	St12_38mm_x1.25.tif	Diplodus vulgaris	0.096	Ostracoda	1.25	0.193	38	0.497409
11	32	St12_38mmcl_x0.71.tif	Diplodus vulgaris	1.244	Natantia	0.71	0.113	38	11.0088
1	33	St12_50mm_cl_x1.2.tif	Diplodus vulgaris	1.194	Polychaeta	1.25	0.193	50	6.18653
2	33	St12_50mm_cl_x1.2.tif	Diplodus vulgaris	0.398	Polychaeta	1.25	0.193	50	2.06218
3	33	St12_50mm_cl_x1.2.tif	Diplodus vulgaris	0.367	Polychaeta	1.25	0.193	50	1.90155
4	33	St12_50mm_cl_x1.2.tif	Diplodus vulgaris	0.162	Gastropoda	1.25	0.193	50	0.839378
5	33	St12_50mm_cl_x1.2.tif	Diplodus vulgaris	0.29	Gastropoda	1.25	0.193	50	1.50259
6	33	St12_50mm_cl_x1.2.tif	Diplodus vulgaris	0.165	Gastropoda	1.25	0.193	50	0.854922
7	33	St12_50mm_cl_x1.2.tif	Diplodus vulgaris	0.137	Gastropoda	1.25	0.193	50	0.709845
8	33	St12_50mm_cl_x1.2.tif	Diplodus vulgaris	0.314	Gastropoda	1.25	0.193	50	1.62694
9	33	St12_50mm_cl_x1.2.tif	Diplodus vulgaris	0.106	Ostracoda	1.25	0.193	50	0.549223
10	33	St12_50mm_cl_x1.2.tif	Diplodus vulgaris	0.103	Ostracoda	1.25	0.193	50	0.533679
1	34	St14_52mmcl_x1.6.tif	Diplodus vulgaris	0.388	Gastropoda	1.6	0.247	52	1.57085
2	34	St14_52mmcl_x1.6.tif	Diplodus vulgaris	0.361	Gastropoda	1.6	0.247	52	1.46154
3	34	St14_52mmcl_x1.6.tif	Diplodus vulgaris	0.291	Harpacticoida	1.6	0.247	52	1.17814
4	34	St14_52mmcl_x1.6.tif	Diplodus vulgaris	0.318	Harpacticoida	1.6	0.247	52	1.28745
5	34	St14_52mmcl_x1.6.tif	Diplodus vulgaris	0.361	Amphipoda	1.6	0.247	52	1.46154
6	34	St14_52mmcl_x1.6.tif	Diplodus vulgaris	0.42	Unknown	1.6	0.247	52	1.7004
1	35	St14_52mmcl_x1.25.tif	Diplodus vulgaris	0.306	Gastropoda	1.25	0.193	52	1.58549
2	35	St14_52mmcl_x1.25.tif	Diplodus vulgaris	0.194	Gastropoda	1.25	0.193	52	1.00518
3	35	St14_52mmcl_x1.25.tif	Diplodus vulgaris	0.272	Gastropoda	1.25	0.193	52	1.40933
4	35	St14_52mmcl_x1.25.tif	Diplodus vulgaris	0.193	Gastropoda	1.25	0.193	52	1
5	35	St14_52mmcl_x1.25.tif	Diplodus vulgaris	0.305	Gastropoda	1.25	0.193	52	1.58031
6	35	St14_52mmcl_x1.25.tif	Diplodus vulgaris	0.247	Gastropoda	1.25	0.193	52	1.27979
7	35	St14_52mmcl_x1.25.tif	Diplodus vulgaris	0.237	Gastropoda	1.25	0.193	52	1.22798
8	35	St14_52mmcl_x1.25.tif	Diplodus vulgaris	0.322	Gastropoda	1.25	0.193	52	1.66839
1	36	39mm_x1.25.tif	Diplodus vulgaris	0.228	Gastropoda	1.25	0.193	39	1.18135
2	36	39mm_x1.25.tif	Diplodus vulgaris	0.258	Gastropoda	1.25	0.193	39	1.33679
3	36	39mm_x1.25.tif	Diplodus vulgaris	0.29	Gastropoda	1.25	0.193	39	1.50259
4	36	39mm_x1.25.tif	Diplodus vulgaris	0.172	Gastropoda	1.25	0.193	39	0.891192
5	36	39mm_x1.25.tif	Diplodus vulgaris	0.127	Ostracoda	1.25	0.193	39	0.658031
6	36	39mm_x1.25.tif	Diplodus vulgaris	0.117	Ostracoda	1.25	0.193	39	0.606218
7	36	39mm_x1.25.tif	Diplodus vulgaris	0.127	Ostracoda	1.25	0.193	39	0.658031
8	36	39mm_x1.25.tif	Diplodus vulgaris	0.113	Ostracoda	1.25	0.193	39	0.585492
9	36	39mm_x1.25.tif	Diplodus vulgaris	0.118	Ostracoda	1.25	0.193	39	0.611399
10	36	39mm_x1.25.tif	Diplodus vulgaris	0.155	Amphipoda	1.25	0.193	39	0.803109
11	36	39mm_x1.25.tif	Diplodus vulgaris	0.301	Amphipoda	1.25	0.193	39	1.55959
12	36	39mm_x1.25.tif	Diplodus vulgaris	0.254	Amphipoda	1.25	0.193	39	1.31606
13	36	39mm_x1.25.tif	Diplodus vulgaris	0.153	Amphipoda	1.25	0.193	39	0.792746
14	36	39mm_x1.25.tif	Diplodus vulgaris	0.245	Amphipoda	1.25	0.193	39	1.26943
15	36	39mm_x1.25.tif	Diplodus vulgaris	0.12	Harpacticoida	1.25	0.193	39	0.621762
16	36	39mm_x1.25.tif	Diplodus vulgaris	0.124	Harpacticoida	1.25	0.193	39	0.642487
17	36	39mm_x1.25.tif	Diplodus vulgaris	0.204	Harpacticoida	1.25	0.193	39	1.05699
1	37	40mm_x1.25_2.tif	Diplodus vulgaris	0.128	Ostracoda	1.25	0.193	40	0.663212
2	37	40mm_x1.25_2.tif	Diplodus vulgaris	0.133	Ostracoda	1.25	0.193	40	0.689119
3	37	40mm_x1.25_2.tif	Diplodus vulgaris	0.096	Ostracoda	1.25	0.193	40	0.497409
4	37	40mm_x1.25_2.tif	Diplodus vulgaris	0.115	Ostracoda	1.25	0.193	40	0.595855
5	37	40mm_x1.25_2.tif	Diplodus vulgaris	0.132	Ostracoda	1.25	0.193	40	0.683938
6	37	40mm_x1.25_2.tif	Diplodus vulgaris	0.103	Ostracoda	1.25	0.193	40	0.533679
7	37	40mm_x1.25_2.tif	Diplodus vulgaris	0.121	Ostracoda	1.25	0.193	40	0.626943
8	37	40mm_x1.25_2.tif	Diplodus vulgaris	0.124	Ostracoda	1.25	0.193	40	0.642487
9	37	40mm_x1.25_2.tif	Diplodus vulgaris	0.189	Gastropoda	1.25	0.193	40	0.979275
10	37	40mm_x1.25_2.tif	Diplodus vulgaris	0.18	Gastropoda	1.25	0.193	40	0.932642
11	37	40mm_x1.25_2.tif	Diplodus vulgaris	0.211	Gastropoda	1.25	0.193	40	1.09326
12	37	40mm_x1.25_2.tif	Diplodus vulgaris	0.213	Gastropoda	1.25	0.193	40	1.10363
13	37	40mm_x1.25_2.tif	Diplodus vulgaris	0.186	Gastropoda	1.25	0.193	40	0.963731
14	37	40mm_x1.25_2.tif	Diplodus vulgaris	0.199	Gastropoda	1.25	0.193	40	1.03109
15	37	40mm_x1.25_2.tif	Diplodus vulgaris	0.188	Gastropoda	1.25	0.193	40	0.974093
16	37	40mm_x1.25_2.tif	Diplodus vulgaris	0.245	Gastropoda	1.25	0.193	40	1.26943
17	37	40mm_x1.25_2.tif	Diplodus vulgaris	0.154	Harpacticoida	1.25	0.193	40	0.797927
18	37	40mm_x1.25_2.tif	Diplodus vulgaris	0.151	Harpacticoida	1.25	0.193	40	0.782383
19	37	40mm_x1.25_2.tif	Diplodus vulgaris	0.2	Harpacticoida	1.25	0.193	40	1.03627
20	37	40mm_x1.25_2.tif	Diplodus vulgaris	0.182	Harpacticoida	1.25	0.193	40	0.943005
21	37	40mm_x1.25_2.tif	Diplodus vulgaris	0.152	Harpacticoida	1.25	0.193	40	0.787565
22	37	40mm_x1.25_2.tif	Diplodus vulgaris	0.094	Harpacticoida	1.25	0.193	40	0.487047
23	37	40mm_x1.25_2.tif	Diplodus vulgaris	0.106	Harpacticoida	1.25	0.193	40	0.549223
24	37	40mm_x1.25_2.tif	Diplodus vulgaris	0.144	Harpacticoida	1.25	0.193	40	0.746114
25	37	40mm_x1.25_2.tif	Diplodus vulgaris	0.164	Harpacticoida	1.25	0.193	40	0.849741
26	37	40mm_x1.25_2.tif	Diplodus vulgaris	0.157	Harpacticoida	1.25	0.193	40	0.813472
27	37	40mm_x1.25_2.tif	Diplodus vulgaris	0.102	Harpacticoida	1.25	0.193	40	0.528497
28	37	40mm_x1.25_2.tif	Diplodus vulgaris	0.203	Harpacticoida	1.25	0.193	40	1.05181
29	37	40mm_x1.25_2.tif	Diplodus vulgaris	0.155	Harpacticoida	1.25	0.193	40	0.803109
30	37	40mm_x1.25_2.tif	Diplodus vulgaris	0.091	Harpacticoida	1.25	0.193	40	0.471503
31	37	40mm_x1.25_2.tif	Diplodus vulgaris	0.143	Harpacticoida	1.25	0.193	40	0.740933
32	37	40mm_x1.25_2.tif	Diplodus vulgaris	0.117	Harpacticoida	1.25	0.193	40	0.606218
33	37	40mm_x1.25_2.tif	Diplodus vulgaris	0.129	Harpacticoida	1.25	0.193	40	0.668394
34	37	40mm_x1.25_2.tif	Diplodus vulgaris	0.128	Harpacticoida	1.25	0.193	40	0.663212
35	37	40mm_x1.25_2.tif	Diplodus vulgaris	0.128	Harpacticoida	1.25	0.193	40	0.663212
36	37	40mm_x1.25_2.tif	Diplodus vulgaris	0.142	Harpacticoida	1.25	0.193	40	0.735751
37	37	40mm_x1.25_2.tif	Diplodus vulgaris	0.095	Harpacticoida	1.25	0.193	40	0.492228
38	37	40mm_x1.25_2.tif	Diplodus vulgaris	0.124	Amphipoda	1.25	0.193	40	0.642487
39	37	40mm_x1.25_2.tif	Diplodus vulgaris	0.114	Amphipoda	1.25	0.193	40	0.590674
40	37	40mm_x1.25_2.tif	Diplodus vulgaris	0.257	Amphipoda	1.25	0.193	40	1.33161
41	37	40mm_x1.25_2.tif	Diplodus vulgaris	0.134	Amphipoda	1.25	0.193	40	0.694301
1	38	40mm_x1.25.tif	Diplodus vulgaris	0.634	Tanaidacea	1.25	0.193	40	3.28497
2	38	40mm_x1.25.tif	Diplodus vulgaris	0.549	Appendage Decapoda	1.25	0.193	40	2.84456
3	38	40mm_x1.25.tif	Diplodus vulgaris	0.66	Diptera	1.25	0.193	40	3.41969
4	38	40mm_x1.25.tif	Diplodus vulgaris	0.476	Caprellidae	1.25	0.193	40	2.46632
5	38	40mm_x1.25.tif	Diplodus vulgaris	0.41	Amphipoda	1.25	0.193	40	2.12435
6	38	40mm_x1.25.tif	Diplodus vulgaris	0.143	Amphipoda	1.25	0.193	40	0.740933
7	38	40mm_x1.25.tif	Diplodus vulgaris	0.157	Amphipoda	1.25	0.193	40	0.813472
8	38	40mm_x1.25.tif	Diplodus vulgaris	0.17	Harpacticoida	1.25	0.193	40	0.880829
9	38	40mm_x1.25.tif	Diplodus vulgaris	0.277	Harpacticoida	1.25	0.193	40	1.43523
10	38	40mm_x1.25.tif	Diplodus vulgaris	0.314	Harpacticoida	1.25	0.193	40	1.62694
1	39	41mm_x1.0.tif	Diplodus vulgaris	0.105	Ostracoda	1	0.153	41	0.686275
2	39	41mm_x1.0.tif	Diplodus vulgaris	0.101	Ostracoda	1	0.153	41	0.660131
3	39	41mm_x1.0.tif	Diplodus vulgaris	0.109	Ostracoda	1	0.153	41	0.712418
4	39	41mm_x1.0.tif	Diplodus vulgaris	0.1	Ostracoda	1	0.153	41	0.653595
5	39	41mm_x1.0.tif	Diplodus vulgaris	0.114	Amphipoda	1	0.153	41	0.745098
6	39	41mm_x1.0.tif	Diplodus vulgaris	0.098	Amphipoda	1	0.153	41	0.640523
7	39	41mm_x1.0.tif	Diplodus vulgaris	0.082	Amphipoda	1	0.153	41	0.535948
8	39	41mm_x1.0.tif	Diplodus vulgaris	0.084	Amphipoda	1	0.153	41	0.54902
9	39	41mm_x1.0.tif	Diplodus vulgaris	0.1	Amphipoda	1	0.153	41	0.653595
10	39	41mm_x1.0.tif	Diplodus vulgaris	0.144	Amphipoda	1	0.153	41	0.941176
11	39	41mm_x1.0.tif	Diplodus vulgaris	0.098	Amphipoda	1	0.153	41	0.640523
12	39	41mm_x1.0.tif	Diplodus vulgaris	0.135	Amphipoda	1	0.153	41	0.882353
13	39	41mm_x1.0.tif	Diplodus vulgaris	0.21	Harpacticoida	1	0.153	41	1.37255
14	39	41mm_x1.0.tif	Diplodus vulgaris	0.089	Harpacticoida	1	0.153	41	0.581699
15	39	41mm_x1.0.tif	Diplodus vulgaris	0.171	Harpacticoida	1	0.153	41	1.11765
1	40	42mm_x1.25.tif	Diplodus vulgaris	0.132	Ostracoda	1.25	0.193	42	0.683938
2	40	42mm_x1.25.tif	Diplodus vulgaris	0.102	Ostracoda	1.25	0.193	42	0.528497
3	40	42mm_x1.25.tif	Diplodus vulgaris	0.128	Ostracoda	1.25	0.193	42	0.663212
4	40	42mm_x1.25.tif	Diplodus vulgaris	0.144	Ostracoda	1.25	0.193	42	0.746114
5	40	42mm_x1.25.tif	Diplodus vulgaris	0.124	Ostracoda	1.25	0.193	42	0.642487
6	40	42mm_x1.25.tif	Diplodus vulgaris	0.142	Ostracoda	1.25	0.193	42	0.735751
7	40	42mm_x1.25.tif	Diplodus vulgaris	0.123	Ostracoda	1.25	0.193	42	0.637306
8	40	42mm_x1.25.tif	Diplodus vulgaris	0.137	Ostracoda	1.25	0.193	42	0.709845
9	40	42mm_x1.25.tif	Diplodus vulgaris	0.303	Isopoda	1.25	0.193	42	1.56995
10	40	42mm_x1.25.tif	Diplodus vulgaris	0.158	Harpacticoida	1.25	0.193	42	0.818653
11	40	42mm_x1.25.tif	Diplodus vulgaris	0.914	Amphipoda	1.25	0.193	42	4.73575
1	41	32mm_x1.tif	Diplodus vulgaris	0.171	Amphipoda	1	0.153	32	1.11765
2	41	32mm_x1.tif	Diplodus vulgaris	0.143	Amphipoda	1	0.153	32	0.934641
3	41	32mm_x1.tif	Diplodus vulgaris	0.103	Amphipoda	1	0.153	32	0.673203
4	41	32mm_x1.tif	Diplodus vulgaris	0.139	Amphipoda	1	0.153	32	0.908497
5	41	32mm_x1.tif	Diplodus vulgaris	0.11	Amphipoda	1	0.153	32	0.718954
6	41	32mm_x1.tif	Diplodus vulgaris	0.122	Amphipoda	1	0.153	32	0.797386
7	41	32mm_x1.tif	Diplodus vulgaris	0.099	Harpacticoida	1	0.153	32	0.647059
8	41	32mm_x1.tif	Diplodus vulgaris	0.114	Harpacticoida	1	0.153	32	0.745098
9	41	32mm_x1.tif	Diplodus vulgaris	0.236	Harpacticoida	1	0.153	32	1.54248
10	41	32mm_x1.tif	Diplodus vulgaris	0.134	Harpacticoida	1	0.153	32	0.875817
11	41	32mm_x1.tif	Diplodus vulgaris	0.126	Harpacticoida	1	0.153	32	0.823529
12	41	32mm_x1.tif	Diplodus vulgaris	0.127	Harpacticoida	1	0.153	32	0.830065
13	41	32mm_x1.tif	Diplodus vulgaris	0.132	Harpacticoida	1	0.153	32	0.862745
14	41	32mm_x1.tif	Diplodus vulgaris	0.115	Ostracoda	1	0.153	32	0.751634
15	41	32mm_x1.tif	Diplodus vulgaris	0.113	Ostracoda	1	0.153	32	0.738562
16	41	32mm_x1.tif	Diplodus vulgaris	0.09	Ostracoda	1	0.153	32	0.588235
17	41	32mm_x1.tif	Diplodus vulgaris	0.13	Ostracoda	1	0.153	32	0.849673
18	41	32mm_x1.tif	Diplodus vulgaris	0.209	Tanaidacea	1	0.153	32	1.36601
1	42	30mm_x1.6.tif	Diplodus vulgaris	0.116	Harpacticoida	1.6	0.247	30	0.469636
2	42	30mm_x1.6.tif	Diplodus vulgaris	0.109	Harpacticoida	1.6	0.247	30	0.441296
3	42	30mm_x1.6.tif	Diplodus vulgaris	0.134	Harpacticoida	1.6	0.247	30	0.54251
4	42	30mm_x1.6.tif	Diplodus vulgaris	0.114	Harpacticoida	1.6	0.247	30	0.461538
5	42	30mm_x1.6.tif	Diplodus vulgaris	0.143	Harpacticoida	1.6	0.247	30	0.578947
6	42	30mm_x1.6.tif	Diplodus vulgaris	0.154	Harpacticoida	1.6	0.247	30	0.623482
7	42	30mm_x1.6.tif	Diplodus vulgaris	0.136	Harpacticoida	1.6	0.247	30	0.550607
8	42	30mm_x1.6.tif	Diplodus vulgaris	0.13	Harpacticoida	1.6	0.247	30	0.526316
9	42	30mm_x1.6.tif	Diplodus vulgaris	0.119	Harpacticoida	1.6	0.247	30	0.481781
10	42	30mm_x1.6.tif	Diplodus vulgaris	0.199	Harpacticoida	1.6	0.247	30	0.805668
11	42	30mm_x1.6.tif	Diplodus vulgaris	0.605	Diptera	1.6	0.247	30	2.44939
12	42	30mm_x1.6.tif	Diplodus vulgaris	0.14	Gastropoda	1.6	0.247	30	0.566802
13	42	30mm_x1.6.tif	Diplodus vulgaris	0.227	Amphipoda	1.6	0.247	30	0.919028
1	43	28mm_x1.6.tif	Diplodus vulgaris	0.165	Ostracoda	1.6	0.247	28	0.668016
2	43	28mm_x1.6.tif	Diplodus vulgaris	0.144	Ostracoda	1.6	0.247	28	0.582996
3	43	28mm_x1.6.tif	Diplodus vulgaris	0.168	Ostracoda	1.6	0.247	28	0.680162
4	43	28mm_x1.6.tif	Diplodus vulgaris	0.15	Ostracoda	1.6	0.247	28	0.607287
5	43	28mm_x1.6.tif	Diplodus vulgaris	0.153	Ostracoda	1.6	0.247	28	0.619433
6	43	28mm_x1.6.tif	Diplodus vulgaris	0.166	Ostracoda	1.6	0.247	28	0.672065
7	43	28mm_x1.6.tif	Diplodus vulgaris	0.155	Harpacticoida	1.6	0.247	28	0.62753
8	43	28mm_x1.6.tif	Diplodus vulgaris	0.197	Harpacticoida	1.6	0.247	28	0.797571
9	43	28mm_x1.6.tif	Diplodus vulgaris	0.127	Harpacticoida	1.6	0.247	28	0.51417
10	43	28mm_x1.6.tif	Diplodus vulgaris	0.215	Harpacticoida	1.6	0.247	28	0.870445
11	43	28mm_x1.6.tif	Diplodus vulgaris	0.127	Harpacticoida	1.6	0.247	28	0.51417
12	43	28mm_x1.6.tif	Diplodus vulgaris	0.108	Harpacticoida	1.6	0.247	28	0.437247
13	43	28mm_x1.6.tif	Diplodus vulgaris	0.097	Harpacticoida	1.6	0.247	28	0.392713
14	43	28mm_x1.6.tif	Diplodus vulgaris	0.066	Harpacticoida	1.6	0.247	28	0.267206
15	43	28mm_x1.6.tif	Diplodus vulgaris	0.25	Harpacticoida	1.6	0.247	28	1.01215
16	43	28mm_x1.6.tif	Diplodus vulgaris	0.252	Mysidacea	1.6	0.247	28	1.02024
17	43	28mm_x1.6.tif	Diplodus vulgaris	0.075	Foraminifera	1.6	0.247	28	0.303644
18	43	28mm_x1.6.tif	Diplodus vulgaris	0.104	Acari	1.6	0.247	28	0.421053
1	44	34mm_x1.tif	Diplodus vulgaris	0.126	Harpacticoida	1	0.153	34	0.823529
2	44	34mm_x1.tif	Diplodus vulgaris	0.13	Harpacticoida	1	0.153	34	0.849673
3	44	34mm_x1.tif	Diplodus vulgaris	0.134	Harpacticoida	1	0.153	34	0.875817
4	44	34mm_x1.tif	Diplodus vulgaris	0.097	Harpacticoida	1	0.153	34	0.633987
5	44	34mm_x1.tif	Diplodus vulgaris	0.143	Harpacticoida	1	0.153	34	0.934641
6	44	34mm_x1.tif	Diplodus vulgaris	0.102	Harpacticoida	1	0.153	34	0.666667
7	44	34mm_x1.tif	Diplodus vulgaris	0.127	Harpacticoida	1	0.153	34	0.830065
8	44	34mm_x1.tif	Diplodus vulgaris	0.071	Harpacticoida	1	0.153	34	0.464052
9	44	34mm_x1.tif	Diplodus vulgaris	0.132	Harpacticoida	1	0.153	34	0.862745
10	44	34mm_x1.tif	Diplodus vulgaris	0.07	Harpacticoida	1	0.153	34	0.457516
11	44	34mm_x1.tif	Diplodus vulgaris	0.08	Harpacticoida	1	0.153	34	0.522876
12	44	34mm_x1.tif	Diplodus vulgaris	0.077	Harpacticoida	1	0.153	34	0.503268
13	44	34mm_x1.tif	Diplodus vulgaris	0.192	Harpacticoida	1	0.153	34	1.2549
14	44	34mm_x1.tif	Diplodus vulgaris	0.086	Harpacticoida	1	0.153	34	0.562092
15	44	34mm_x1.tif	Diplodus vulgaris	0.076	Harpacticoida	1	0.153	34	0.496732
16	44	34mm_x1.tif	Diplodus vulgaris	0.071	Harpacticoida	1	0.153	34	0.464052
17	44	34mm_x1.tif	Diplodus vulgaris	0.095	Harpacticoida	1	0.153	34	0.620915
18	44	34mm_x1.tif	Diplodus vulgaris	0.203	Amphipoda	1	0.153	34	1.3268
1	45	32mm_x1.6_2.tif	Diplodus vulgaris	0.186	Harpacticoida	1.6	0.247	32	0.753036
2	45	32mm_x1.6_2.tif	Diplodus vulgaris	0.249	Harpacticoida	1.6	0.247	32	1.0081
3	45	32mm_x1.6_2.tif	Diplodus vulgaris	0.234	Harpacticoida	1.6	0.247	32	0.947368
4	45	32mm_x1.6_2.tif	Diplodus vulgaris	0.097	Harpacticoida	1.6	0.247	32	0.392713
5	45	32mm_x1.6_2.tif	Diplodus vulgaris	0.172	Amphipoda	1.6	0.247	32	0.696356
6	45	32mm_x1.6_2.tif	Diplodus vulgaris	0.201	Amphipoda	1.6	0.247	32	0.813765
7	45	32mm_x1.6_2.tif	Diplodus vulgaris	0.318	Amphipoda	1.6	0.247	32	1.28745
8	45	32mm_x1.6_2.tif	Diplodus vulgaris	0.418	Isopoda	1.6	0.247	32	1.69231
9	45	32mm_x1.6_2.tif	Diplodus vulgaris	0.391	Gastropoda	1.6	0.247	32	1.583
1	46	30mm_x1.0.tif	Diplodus vulgaris	0.133	Harpacticoida	1	0.153	30	0.869281
2	46	30mm_x1.0.tif	Diplodus vulgaris	0.06	Harpacticoida	1	0.153	30	0.392157
3	46	30mm_x1.0.tif	Diplodus vulgaris	0.122	Harpacticoida	1	0.153	30	0.797386
4	46	30mm_x1.0.tif	Diplodus vulgaris	0.074	Harpacticoida	1	0.153	30	0.48366
5	46	30mm_x1.0.tif	Diplodus vulgaris	0.127	Harpacticoida	1	0.153	30	0.830065
6	46	30mm_x1.0.tif	Diplodus vulgaris	0.108	Harpacticoida	1	0.153	30	0.705882
7	46	30mm_x1.0.tif	Diplodus vulgaris	0.079	Harpacticoida	1	0.153	30	0.51634
8	46	30mm_x1.0.tif	Diplodus vulgaris	0.079	Harpacticoida	1	0.153	30	0.51634
9	46	30mm_x1.0.tif	Diplodus vulgaris	0.055	Harpacticoida	1	0.153	30	0.359477
10	46	30mm_x1.0.tif	Diplodus vulgaris	0.084	Harpacticoida	1	0.153	30	0.54902
11	46	30mm_x1.0.tif	Diplodus vulgaris	0.073	Harpacticoida	1	0.153	30	0.477124
12	46	30mm_x1.0.tif	Diplodus vulgaris	0.079	Harpacticoida	1	0.153	30	0.51634
13	46	30mm_x1.0.tif	Diplodus vulgaris	0.064	Harpacticoida	1	0.153	30	0.418301
14	46	30mm_x1.0.tif	Diplodus vulgaris	0.072	Harpacticoida	1	0.153	30	0.470588
15	46	30mm_x1.0.tif	Diplodus vulgaris	0.092	Harpacticoida	1	0.153	30	0.601307
16	46	30mm_x1.0.tif	Diplodus vulgaris	0.044	Harpacticoida	1	0.153	30	0.287582
17	46	30mm_x1.0.tif	Diplodus vulgaris	0.063	Harpacticoida	1	0.153	30	0.411765
18	46	30mm_x1.0.tif	Diplodus vulgaris	0.09	Harpacticoida	1	0.153	30	0.588235
19	46	30mm_x1.0.tif	Diplodus vulgaris	0.096	Amphipoda	1	0.153	30	0.627451
20	46	30mm_x1.0.tif	Diplodus vulgaris	0.151	Amphipoda	1	0.153	30	0.986928
21	46	30mm_x1.0.tif	Diplodus vulgaris	0.079	Amphipoda	1	0.153	30	0.51634
22	46	30mm_x1.0.tif	Diplodus vulgaris	0.208	Amphipoda	1	0.153	30	1.35948
23	46	30mm_x1.0.tif	Diplodus vulgaris	0.127	Harpacticoida	1.6	0.247	30	0.51417
24	46	30mm_x1.0.tif	Diplodus vulgaris	0.089	Harpacticoida	1.6	0.247	30	0.360324
1	47	29mm_x1.6.tif	Diplodus vulgaris	0.261	Harpacticoida	1.6	0.247	29	1.05668
2	47	29mm_x1.6.tif	Diplodus vulgaris	0.167	Harpacticoida	1.6	0.247	29	0.676113
3	47	29mm_x1.6.tif	Diplodus vulgaris	0.198	Harpacticoida	1.6	0.247	29	0.801619
4	47	29mm_x1.6.tif	Diplodus vulgaris	0.141	Harpacticoida	1.6	0.247	29	0.57085
5	47	29mm_x1.6.tif	Diplodus vulgaris	0.14	Harpacticoida	1.6	0.247	29	0.566802
6	47	29mm_x1.6.tif	Diplodus vulgaris	0.142	Harpacticoida	1.6	0.247	29	0.574899
7	47	29mm_x1.6.tif	Diplodus vulgaris	0.09	Harpacticoida	1.6	0.247	29	0.364372
8	47	29mm_x1.6.tif	Diplodus vulgaris	0.196	Harpacticoida	1.6	0.247	29	0.793522
9	47	29mm_x1.6.tif	Diplodus vulgaris	0.137	Harpacticoida	1.6	0.247	29	0.554656
10	47	29mm_x1.6.tif	Diplodus vulgaris	0.17	Harpacticoida	1.6	0.247	29	0.688259
11	47	29mm_x1.6.tif	Diplodus vulgaris	0.165	Harpacticoida	1.6	0.247	29	0.668016
12	47	29mm_x1.6.tif	Diplodus vulgaris	0.137	Harpacticoida	1.6	0.247	29	0.554656
13	47	29mm_x1.6.tif	Diplodus vulgaris	0.094	Harpacticoida	1.6	0.247	29	0.380567
14	47	29mm_x1.6.tif	Diplodus vulgaris	0.107	Harpacticoida	1.6	0.247	29	0.433198
15	47	29mm_x1.6.tif	Diplodus vulgaris	0.146	Harpacticoida	1.6	0.247	29	0.591093
1	48	32mm_x1.6.tif	Diplodus vulgaris	0.18	Ostracoda	1.6	0.247	32	0.728745
2	48	32mm_x1.6.tif	Diplodus vulgaris	0.218	Harpacticoida	1.6	0.247	32	0.882591
3	48	32mm_x1.6.tif	Diplodus vulgaris	0.24	Harpacticoida	1.6	0.247	32	0.97166
4	48	32mm_x1.6.tif	Diplodus vulgaris	0.345	Harpacticoida	1.6	0.247	32	1.39676
5	48	32mm_x1.6.tif	Diplodus vulgaris	0.133	Harpacticoida	1.6	0.247	32	0.538462
6	48	32mm_x1.6.tif	Diplodus vulgaris	0.176	Harpacticoida	1.6	0.247	32	0.712551
7	48	32mm_x1.6.tif	Diplodus vulgaris	0.223	Harpacticoida	1.6	0.247	32	0.902834
8	48	32mm_x1.6.tif	Diplodus vulgaris	0.189	Harpacticoida	1.6	0.247	32	0.765182
9	48	32mm_x1.6.tif	Diplodus vulgaris	0.912	Caprellidae	1.6	0.247	32	3.69231
1	49	34mm_x1.6.tif	Diplodus vulgaris	0.181	Ostracoda	1.6	0.247	34	0.732794
2	49	34mm_x1.6.tif	Diplodus vulgaris	0.136	Ostracoda	1.6	0.247	34	0.550607
3	49	34mm_x1.6.tif	Diplodus vulgaris	0.16	Ostracoda	1.6	0.247	34	0.647773
4	49	34mm_x1.6.tif	Diplodus vulgaris	0.147	Ostracoda	1.6	0.247	34	0.595142
5	49	34mm_x1.6.tif	Diplodus vulgaris	0.181	Harpacticoida	1.6	0.247	34	0.732794
6	49	34mm_x1.6.tif	Diplodus vulgaris	0.116	Harpacticoida	1.6	0.247	34	0.469636
7	49	34mm_x1.6.tif	Diplodus vulgaris	0.168	Harpacticoida	1.6	0.247	34	0.680162
8	49	34mm_x1.6.tif	Diplodus vulgaris	0.122	Harpacticoida	1.6	0.247	34	0.493927
9	49	34mm_x1.6.tif	Diplodus vulgaris	0.161	Harpacticoida	1.6	0.247	34	0.651822
10	49	34mm_x1.6.tif	Diplodus vulgaris	0.132	Harpacticoida	1.6	0.247	34	0.534413
11	49	34mm_x1.6.tif	Diplodus vulgaris	0.154	Harpacticoida	1.6	0.247	34	0.623482
12	49	34mm_x1.6.tif	Diplodus vulgaris	0.19	Harpacticoida	1.6	0.247	34	0.769231
13	49	34mm_x1.6.tif	Diplodus vulgaris	0.087	Harpacticoida	1.6	0.247	34	0.352227
14	49	34mm_x1.6.tif	Diplodus vulgaris	0.13	Harpacticoida	1.6	0.247	34	0.526316
15	49	34mm_x1.6.tif	Diplodus vulgaris	0.221	Amphipoda	1.6	0.247	34	0.894737
16	49	34mm_x1.6.tif	Diplodus vulgaris	0.2	Amphipoda	1.6	0.247	34	0.809717
1	50	41mm_x1.tif	Diplodus vulgaris	0.961	Polychaeta	1	0.153	41	6.28105
2	50	41mm_x1.tif	Diplodus vulgaris	0.606	Polychaeta	1	0.153	41	3.96078
3	50	41mm_x1.tif	Diplodus vulgaris	0.871	Polychaeta	1	0.153	41	5.69281
4	50	41mm_x1.tif	Diplodus vulgaris	0.26	Polychaeta	1	0.153	41	1.69935
5	50	41mm_x1.tif	Diplodus vulgaris	0.148	Amphipoda	1	0.153	41	0.96732
6	50	41mm_x1.tif	Diplodus vulgaris	0.166	Amphipoda	1	0.153	41	1.08497
7	50	41mm_x1.tif	Diplodus vulgaris	0.13	Harpacticoida	1	0.153	41	0.849673
8	50	41mm_x1.tif	Diplodus vulgaris	0.21	Harpacticoida	1	0.153	41	1.37255
9	50	41mm_x1.tif	Diplodus vulgaris	0.186	Harpacticoida	1	0.153	41	1.21569
10	50	41mm_x1.tif	Diplodus vulgaris	0.177	Harpacticoida	1	0.153	41	1.15686
11	50	41mm_x1.tif	Diplodus vulgaris	0.157	Harpacticoida	1	0.153	41	1.02614

## Sheet: Calibration
Magnification	No. of pixels in 1mm
0.71	0.113
1	0.153
1.25	0.193
1.6	0.247
2	0.31
2.5	0.39
3.2	0.494
4	0.617
5	0.78
6.3	0.98
8	1.247
10	1.56
11.5	1.837

## Sheet: Caudal length vs total length
Species	Caudal length	Total length	Predicted
Diplodus vulgaris	41	50	50
	38	47	47
	37	46	45
	34	42	42
	33	42	41
	35	42	43
	41	49	50
	34	43	42
	32	40	40
	29	36	37
	30	37	38
	34	43	42
	28	36	36
Coris julis	92	105	104
	80	91	91
	57	64	64
	46	51	52
	75	84	85
	60	67	68
	42	48	47
	56	63	63
	55	63	62
Symphodus o.	50	60	60
	53	63	64
	48	58	57
	53	63	64
	66	83	82
	51	60	61
	45	54	53
	50	60	60
	47	57	56
